# Supplementary material
Source: PubMed Central journal article supplement (PMC3474693)
Supplement: psb-7-951-s01.pdf [file psb-7-951-s01.pdf]

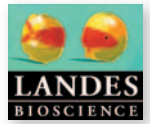

## **Supplemental Material to:**

**Rohini Garg, Akhilesh K. Tyagi and Mukesh Jain  
Microarray analysis reveals overlapping and specific  
transcriptional responses to different plant hormones in  
rice**

**Plant Signaling & Behavior 2012; 7(8)**

**<http://dx.doi.org/10.4161/psb.20910>**

**<http://www.landesbioscience.com/journals/psb/article/20910>**

Supplemental Table S1. List of rice genes differentially expressed in the presence of different plant hormones.

| Probe Set ID       | Locus          | Gene description                                                                  | IAA         |            | BAP         |            | ABA         |            | ACC         |            | SA          |            | JA          |            | Hormone specificity |
|--------------------|----------------|-----------------------------------------------------------------------------------|-------------|------------|-------------|------------|-------------|------------|-------------|------------|-------------|------------|-------------|------------|---------------------|
|                    |                |                                                                                   | Fold change | Regulation |                     |
| Os.10006.1.S1_at   | LOC_Os01g47400 | OsMan01 - Endo-Beta-Mannanase, expressed                                          | 1.15        | up         | 1.12        | up         | 2.07        | down       | 1.02        | up         | 1.11        | down       | 1.02        | up         | ABA                 |
| Os.10006.2.S1_x_at | LOC_Os01g47400 | OsMan01 - Endo-Beta-Mannanase, expressed                                          | 1.59        | up         | 1.09        | down       | 2.23        | down       | 1.09        | down       | 1.22        | down       | 1.11        | up         | ABA                 |
| Os.10025.1.S1_a_at | LOC_Os12g43130 | phytoene synthase, chloroplast precursor, putative, expressed                     | 1.16        | up         | 1.04        | up         | 3.28        | down       | 1.08        | down       | 1.61        | down       | 1.05        | down       | ABA                 |
| Os.10031.1.S1_at   | LOC_Os05g35140 | nodulin MtN3 family protein, putative, expressed                                  | 1.29        | up         | 1.25        | up         | 7.61        | up         | 1.18        | down       | 1.18        | down       | 1.36        | down       | ABA                 |
| Os.10058.1.S1_at   | LOC_Os05g31620 | OsCML15 - Calmodulin-related calcium sensor protein, expressed                    | 1.20        | down       | 1.23        | down       | 2.27        | up         | 1.44        | down       | 1.13        | up         | 1.13        | down       | ABA                 |
| Os.10071.1.S1_at   | LOC_Os12g44300 | CHX28, putative, expressed                                                        | 1.00        | up         | 1.10        | up         | 1.04        | down       | 1.00        | up         | 1.05        | up         | 6.42        | up         | JA                  |
| Os.10095.1.S1_at   | LOC_Os03g60340 | leaf senescence related protein, putative, expressed                              | 1.05        | up         | 1.14        | up         | 2.17        | down       | 1.25        | down       | 1.34        | down       | 1.09        | down       | ABA                 |
| Os.10096.1.S1_a_at | LOC_Os01g05830 | expressed protein                                                                 | 1.09        | up         | 1.13        | down       | 7.87        | up         | 1.52        | down       | 1.35        | up         | 1.17        | down       | ABA                 |
| Os.10096.1.S1_at   | LOC_Os01g05830 | expressed protein                                                                 | 1.00        | down       | 1.09        | up         | 6.95        | up         | 1.08        | down       | 1.40        | up         | 1.01        | down       | ABA                 |
| Os.10096.2.S1_x_at | LOC_Os01g05830 | expressed protein                                                                 | 1.27        | up         | 1.05        | up         | 7.31        | up         | 1.07        | down       | 1.32        | up         | 1.08        | up         | ABA                 |
| Os.10097.1.S1_at   | LOC_Os04g17100 | heavy metal-associated domain containing protein, expressed                       | 1.41        | up         | 1.42        | down       | 10.10       | up         | 1.94        | down       | 1.67        | up         | 1.23        | down       | ABA                 |
| Os.10099.1.S1_at   | LOC_Os03g13870 | expressed protein                                                                 | 1.27        | down       | 1.31        | down       | 5.50        | down       | 1.67        | down       | 2.05        | down       | 1.07        | down       | 2                   |
| Os.10099.2.S1_at   | LOC_Os03g13870 | expressed protein                                                                 | 1.11        | down       | 1.24        | up         | 2.98        | down       | 1.67        | down       | 1.46        | down       | 1.19        | down       | ABA                 |
| Os.10101.1.S1_at   | LOC_Os05g36990 | ATOFFP18/OFPP18, putative, expressed                                              | 1.11        | down       | 1.04        | down       | 7.95        | down       | 1.05        | up         | 1.40        | down       | 1.31        | down       | ABA                 |
| Os.10117.1.S1_at   | LOC_Os04g41460 | transporter family protein, putative, expressed                                   | 1.06        | up         | 1.12        | down       | 2.05        | up         | 1.12        | down       | 1.12        | up         | 1.11        | up         | ABA                 |
| Os.10120.2.S1_at   | LOC_Os11g02424 | LTP19 - Protease inhibitor/seed storage/LTP family protein precursor, expressed   | 1.10        | down       | 1.48        | up         | 8.57        | down       | 1.37        | down       | 2.24        | down       | 1.48        | down       | 2                   |
| Os.10121.1.S1_at   | LOC_Os01g62070 | cation efflux family protein, putative, expressed                                 | 1.64        | up         | 1.11        | up         | 2.42        | up         | 1.06        | up         | 1.08        | up         | 1.06        | up         | ABA                 |
| Os.10122.1.S1_at   | LOC_Os01g32330 | heavy metal-associated domain containing protein, expressed                       | 1.41        | up         | 1.01        | down       | 2.58        | up         | 1.09        | down       | 1.08        | up         | 1.15        | down       | ABA                 |
| Os.10123.1.S1_at   | LOC_Os01g58114 | expressed protein                                                                 | 1.09        | up         | 1.14        | down       | 2.63        | up         | 1.03        | down       | 1.49        | up         | 1.02        | up         | ABA                 |
| Os.10123.2.S1_x_at | LOC_Os01g58114 | expressed protein                                                                 | 1.27        | up         | 1.11        | down       | 2.95        | up         | 1.09        | up         | 1.63        | up         | 1.34        | up         | ABA                 |
| Os.10131.1.S1_a_at | LOC_Os05g51670 | NAD dependent epimerase/dehydratase family protein, putative, expressed           | 1.11        | down       | 1.03        | up         | 12.62       | up         | 1.14        | up         | 2.29        | up         | 1.19        | up         | 2                   |
| Os.10141.1.S1_at   | LOC_Os03g53750 | nuclear prelamin A recognition factor, putative, expressed                        | 1.76        | up         | 1.13        | down       | 2.02        | up         | 1.01        | up         | 2.37        | up         | 1.27        | up         | 2                   |
| Os.10146.1.S1_at   | LOC_Os03g59320 | expressed protein                                                                 | 1.31        | up         | 1.46        | down       | 7.42        | up         | 1.11        | up         | 2.16        | up         | 1.27        | up         | 2                   |
| Os.10168.1.S1_at   | LOC_Os12g25120 | core histone H2A/H2B/H3/H4, putative, expressed                                   | 1.09        | down       | 1.15        | up         | 2.18        | down       | 1.02        | up         | 1.41        | down       | 1.34        | down       | ABA                 |
| Os.10179.1.S1_at   | LOC_Os06g03640 | BAG domain containing protein, expressed                                          | 1.16        | down       | 1.14        | down       | 3.21        | down       | 1.22        | down       | 1.54        | down       | 1.72        | up         | ABA                 |
| Os.10183.1.S2_at   | LOC_Os05g08370 | CESA1 - cellulose synthase, expressed                                             | 1.04        | down       | 1.05        | down       | 2.21        | down       | 1.29        | down       | 1.57        | down       | 1.17        | up         | ABA                 |
| Os.10186.1.S1_s_at | LOC_Os08g32170 | oxidoreductase, 2OG-Fell oxygenase domain containing protein, putative, expressed | 1.37        | down       | 1.11        | up         | 2.22        | down       | 1.05        | up         | 1.05        | down       | 1.17        | up         | ABA                 |
| Os.10196.1.S1_at   | LOC_Os01g58320 | Expressed protein                                                                 | 1.09        | down       | 1.22        | up         | 44.30       | up         | 1.01        | down       | 1.01        | up         | 1.13        | down       | ABA                 |
| Os.10197.1.S1_at   | LOC_Os11g24060 | permease domain containing protein, putative, expressed                           | 1.95        | up         | 1.13        | down       | 3.91        | up         | 1.07        | up         | 1.14        | up         | 1.81        | down       | ABA                 |
| Os.10204.1.S1_at   | LOC_Os01g09590 | myb-like DNA-binding domain containing protein, putative, expressed               | 1.52        | down       | 1.43        | up         | 3.00        | down       | 1.13        | up         | 1.04        | down       | 1.74        | up         | ABA                 |
| Os.10244.1.S1_s_at | LOC_Os02g02340 | glycerol-3-phosphate acyltransferase, putative, expressed                         | 1.06        | down       | 1.00        | down       | 2.44        | up         | 1.03        | up         | 1.74        | up         | 3.20        | up         | 2                   |
| Os.10245.1.S1_at   | LOC_Os04g37700 | expressed protein                                                                 | 1.45        | down       | 2.14        | up         | 1.23        | down       | 1.23        | down       | 1.94        | up         | 2.16        | down       | 2                   |
| Os.10246.3.S1_at   | LOC_Os06g06460 | histone H3, putative, expressed                                                   | 1.26        | down       | 1.25        | down       | 2.84        | down       | 1.31        | down       | 1.96        | down       | 1.79        | down       | ABA                 |
| Os.10246.5.S1_at   | LOC_Os06g06490 | U-box domain containing heat shock protein, putative, expressed                   | 1.32        | down       | 1.14        | down       | 2.77        | down       | 1.22        | down       | 1.83        | down       | 1.36        | down       | ABA                 |
| Os.10254.1.S1_at   | LOC_Os08g38600 | copine, putative, expressed                                                       | 1.46        | up         | 1.19        | up         | 1.38        | up         | 1.52        | up         | 8.13        | up         | 1.12        | up         | SA                  |
| Os.10258.1.S1_at   | LOC_Os01g68970 | HYS1, putative, expressed                                                         | 1.01        | up         | 1.19        | down       | 2.05        | up         | 1.03        | down       | 1.29        | up         | 1.10        | down       | ABA                 |
| Os.10262.1.S1_at   | LOC_Os08g02140 | STIP1 homology and U box-containing protein 1, putative, expressed                | 1.08        | down       | 1.01        | up         | 2.08        | up         | 1.08        | up         | 1.14        | up         | 1.01        | down       | ABA                 |
| Os.10271.1.S1_x_at | LOC_Os01g15860 | pre-mRNA splicing factor-related prp1                                             | 1.04        | down       | 1.11        | up         | 2.78        | up         | 1.01        | up         | 1.15        | down       | 1.05        | down       | ABA                 |
| Os.10273.1.S1_at   | LOC_Os08g31660 | VQ domain containing protein, putative, expressed                                 | 1.63        | down       | 2.51        | up         | 3.33        | down       | 1.26        | up         | 1.09        | up         | 1.37        | up         | 2                   |
| Os.10280.1.A1_at   | LOC_Os02g04510 | UOS1, putative, expressed                                                         | 1.29        | up         | 1.63        | down       | 3.54        | down       | 1.78        | up         | 1.19        | up         | 1.17        | up         | ABA                 |
| Os.10303.1.S2_at   | LOC_Os03g01350 | expressed protein                                                                 | 1.80        | up         | 1.08        | up         | 2.45        | up         | 1.04        | down       | 1.05        | down       | 1.07        | up         | ABA                 |
| Os.10305.1.S1_at   | LOC_Os08g41880 | nucleotide pyrophosphatase/phosphodiesterase, putative, expressed                 | 1.68        | down       | 1.14        | down       | 4.21        | down       | 1.52        | down       | 1.54        | down       | 1.64        | up         | ABA                 |
| Os.10306.2.S1_x_at | LOC_Os01g24480 | DUF1399 containing protein, putative, expressed                                   | 1.05        | up         | 1.35        | down       | 3.48        | up         | 1.04        | down       | 1.26        | up         | 1.27        | down       | ABA                 |
| Os.10310.1.S1_at   | LOC_Os01g38359 | peptidyl-prolyl cis-trans isomerase, FKBP-type, putative, expressed               | 1.17        | up         | 1.02        | down       | 2.29        | down       | 1.13        | up         | 1.22        | down       | 1.06        | up         | ABA                 |
| Os.10311.1.S1_a_at | LOC_Os06g14324 | caleosin related protein, putative, expressed                                     | 1.31        | up         | 1.13        | up         | 2.22        | down       | 1.11        | down       | 1.39        | down       | 1.03        | down       | ABA                 |
| Os.10322.1.S1_s_at | LOC_Os07g38170 | remorin, putative, expressed                                                      | 1.75        | up         | 2.18        | up         | 1.66        | up         | 1.04        | down       | 1.07        | up         | 1.28        | down       | BAP                 |
| Os.10339.1.S1_at   | LOC_Os03g04770 | beta-amylase, putative, expressed                                                 | 1.35        | down       | 1.14        | down       | 17.09       | up         | 1.10        | down       | 1.31        | up         | 1.10        | up         | ABA                 |
| Os.10348.1.S1_at   | LOC_Os01g41430 | UDP-glucuronosyl and UDP-glucosyl transferase, putative, expressed                | 5.24        | up         | 1.25        | up         | 1.48        | down       | 1.75        | up         | 4.43        | up         | 2.31        | up         | 3                   |
| Os.10352.1.S1_at   | LOC_Os05g01470 | methionine S-methyltransferase, putative, expressed                               | 1.14        | down       | 1.28        | up         | 2.24        | down       | 1.04        | down       | 1.33        | down       | 1.33        | up         | ABA                 |
| Os.10356.1.S1_at   | LOC_Os03g08320 | ZIM domain containing protein, putative, expressed                                | 1.82        | up         | 1.08        | down       | 3.99        | up         | 1.57        | down       | 1.88        | up         | 7.31        | up         | 2                   |

|                    |                |                                                                                     |      |      |      |      |       |      |      |      |      |      |      |      |     |
|--------------------|----------------|-------------------------------------------------------------------------------------|------|------|------|------|-------|------|------|------|------|------|------|------|-----|
| Os.10373.1.S1_at   | LOC_Os07g41410 | EGG APPARATUS-1, putative, expressed                                                | 1.19 | down | 1.06 | down | 2.16  | down | 1.12 | down | 1.30 | up   | 1.16 | down | ABA |
| Os.10378.2.A1_s_at | LOC_Os01g72570 | expressed protein                                                                   | 1.24 | up   | 1.12 | down | 2.47  | up   | 1.15 | up   | 1.61 | up   | 1.41 | up   | ABA |
| Os.10381.1.S1_at   | LOC_Os06g06080 | serine esterase family protein, putative, expressed                                 | 1.39 | up   | 1.05 | up   | 3.40  | up   | 1.47 | up   | 1.31 | up   | 1.60 | up   | ABA |
| Os.10382.1.S1_at   | LOC_Os07g07974 | tesmin/TSO1-like CXC domain containing protein, expressed                           | 1.28 | up   | 1.13 | down | 3.50  | up   | 1.04 | down | 1.34 | up   | 1.10 | down | ABA |
| Os.10391.1.S1_a_at | LOC_Os05g51630 | early-responsive to dehydration protein-related, putative, expressed                | 1.12 | up   | 1.11 | down | 2.43  | up   | 1.13 | down | 1.08 | down | 1.23 | down | ABA |
| Os.10399.1.S1_at   | LOC_Os05g02310 | soluble inorganic pyrophosphatase, putative, expressed                              | 1.02 | down | 1.07 | down | 2.22  | down | 1.52 | down | 2.41 | down | 1.78 | up   | 2   |
| Os.1041.1.S1_x_at  | LOC_Os01g42850 | ThiF family domain containing protein, putative, expressed                          | 1.35 | up   | 1.10 | up   | 3.16  | up   | 1.07 | up   | 1.35 | up   | 1.11 | up   | ABA |
| Os.10411.1.S1_at   | LOC_Os01g62190 | ZOS1-15 - C2H2 zinc finger protein, expressed                                       | 1.64 | up   | 1.46 | up   | 3.60  | up   | 1.05 | down | 3.08 | up   | 1.22 | down | 2   |
| Os.10416.1.S1_at   | CT829780       | Oryza sativa (indica cultivar-group) cDNA clone:OSIGCSN085D03, full insert sequence | 1.09 | up   | 1.29 | up   | 2.86  | down | 1.47 | down | 2.16 | down | 3.68 | up   | 3   |
| Os.10423.1.S1_at   | LOC_Os07g48630 | ethylene-insensitive 3, putative, expressed                                         | 1.28 | up   | 1.16 | up   | 3.03  | up   | 1.14 | down | 1.08 | up   | 2.40 | up   | 2   |
| Os.10423.1.S1_s_at | LOC_Os07g48630 | ethylene-insensitive 3, putative, expressed                                         | 1.11 | up   | 1.01 | down | 2.48  | up   | 1.07 | down | 1.03 | up   | 2.03 | up   | 2   |
| Os.10424.1.S1_at   | LOC_Os08g34220 | omega-6 fatty acid desaturase, chloroplast precursor, putative, expressed           | 1.15 | up   | 1.08 | up   | 3.13  | down | 1.05 | down | 1.68 | down | 1.22 | down | ABA |
| Os.10468.1.S1_at   | LOC_Os03g51470 | expressed protein                                                                   | 1.03 | up   | 1.08 | down | 1.63  | down | 1.26 | up   | 2.36 | up   | 1.11 | up   | SA  |
| Os.10473.1.S1_at   | LOC_Os12g25690 | UDP-glucose 6-dehydrogenase, putative, expressed                                    | 1.07 | down | 1.16 | down | 4.84  | down | 1.12 | down | 2.18 | down | 1.14 | up   | 2   |
| Os.10483.1.S1_at   | LOC_Os07g39620 | C2 domain containing protein, putative, expressed                                   | 1.19 | up   | 1.03 | up   | 2.00  | up   | 1.24 | up   | 1.33 | up   | 1.11 | up   | ABA |
| Os.10494.1.S1_at   | LOC_Os01g14140 | X8 domain containing protein, expressed                                             | 1.06 | down | 1.12 | down | 3.96  | down | 1.14 | down | 2.18 | down | 1.87 | down | 2   |
| Os.10497.1.S1_s_at | LOC_Os07g23640 | retrotransposon protein, putative, Ty3-gypsy subclass, expressed                    | 1.16 | down | 1.24 | down | 2.93  | up   | 1.30 | down | 1.05 | up   | 1.94 | up   | ABA |
| Os.10505.1.S1_a_at | LOC_Os10g39010 | TKL_IRAK_CrRLK1L-1.16 - The CrRLK1L-1 subfamily has homology to the CrRLK1L         | 1.03 | up   | 1.10 | down | 3.29  | down | 1.18 | up   | 1.12 | up   | 1.25 | up   | ABA |
| Os.10510.1.S1_at   | LOC_Os03g03034 | flavonol synthase/flavanone 3-hydroxylase, putative, expressed                      | 1.10 | up   | 2.55 | up   | 5.91  | down | 1.26 | up   | 2.64 | up   | 3.12 | up   | 4   |
| Os.10512.1.S1_at   | LOC_Os04g53740 | thioredoxin, putative, expressed                                                    | 1.08 | down | 1.01 | up   | 2.02  | up   | 1.30 | down | 1.06 | up   | 1.30 | down | ABA |
| Os.10524.2.S1_at   | LOC_Os12g03070 | FHA domain containing protein, putative, expressed                                  | 2.25 | down | 1.03 | up   | 2.23  | down | 1.61 | down | 1.51 | down | 1.42 | down | 2   |
| Os.10556.1.S1_at   | CT837713       | Oryza sativa (indica cultivar-group) cDNA clone:OSIGCSA011G13, full insert sequence | 1.01 | down | 2.07 | down | 31.52 | up   | 1.15 | down | 1.86 | up   | 1.11 | down | 2   |
| Os.10570.1.S1_at   | LOC_Os06g35960 | HSF-type DNA-binding domain containing protein, expressed                           | 1.35 | up   | 1.27 | down | 47.71 | up   | 1.97 | down | 1.91 | up   | 1.15 | down | ABA |
| Os.10572.1.S1_at   | LOC_Os03g59360 | remorin, putative, expressed                                                        | 1.10 | up   | 1.23 | down | 3.00  | up   | 1.17 | down | 1.14 | up   | 1.16 | down | ABA |
| Os.10574.1.S1_at   | LOC_Os10g02770 | glycosyl hydrolases family 16, putative, expressed                                  | 1.20 | down | 1.17 | up   | 3.53  | down | 1.11 | up   | 1.32 | down | 1.74 | down | ABA |
| Os.10576.1.S1_at   | LOC_Os02g33550 | harpin-induced protein 1 domain containing protein, expressed                       | 1.07 | up   | 1.12 | down | 3.12  | down | 1.07 | down | 1.31 | down | 1.24 | up   | ABA |
| Os.10578.1.A1_at   | LOC_Os03g20420 | alpha-N-arabinofuranosidase A, putative, expressed                                  | 1.07 | up   | 1.17 | down | 1.97  | down | 1.04 | down | 1.91 | down | 2.13 | down | JA  |
| Os.10579.1.S1_at   | LOC_Os08g02700 | fructose-bisphosphate aldolase isozyme, putative, expressed                         | 1.58 | up   | 1.39 | down | 5.28  | up   | 1.08 | up   | 7.72 | up   | 4.53 | up   | 3   |
| Os.10580.1.S1_at   | LOC_Os01g34790 | expressed protein                                                                   | 1.00 | down | 2.01 | up   | 1.08  | down | 1.00 | up   | 1.04 | down | 1.03 | up   | BAP |
| Os.10590.1.S1_at   | LOC_Os08g01370 | expressed protein similar to seed maturation protein PM28                           | 1.01 | up   | 1.02 | up   | 17.92 | up   | 1.01 | down | 1.03 | up   | 1.09 | up   | ABA |
| Os.10590.1.S1_s_at | LOC_Os08g01370 | expressed protein similar to seed maturation protein PM28                           | 1.01 | down | 1.09 | down | 41.92 | up   | 1.02 | up   | 1.24 | down | 1.25 | down | ABA |
| Os.10597.1.S1_at   | LOC_Os01g53350 | anthocyanidin 5,3-O-glucosyltransferase, putative, expressed                        | 1.04 | up   | 1.27 | up   | 2.27  | down | 1.08 | up   | 1.62 | up   | 1.48 | down | ABA |
| Os.10612.1.S1_at   | LOC_Os03g61960 | 2Fe-2S iron-sulfur cluster binding domain containing protein, expressed             | 1.03 | up   | 1.00 | down | 1.83  | down | 1.16 | up   | 1.29 | up   | 2.06 | up   | JA  |
| Os.10628.1.S1_at   | LOC_Os02g03730 | SWIB/MDM2 domain containing protein, expressed                                      | 1.07 | up   | 1.06 | up   | 2.73  | down | 1.01 | down | 1.55 | down | 1.38 | down | ABA |
| Os.10652.1.S1_at   | LOC_Os03g03810 | DEF8 - Defensin and Defensin-like DEFL family, expressed                            | 1.17 | down | 3.59 | up   | 5.59  | up   | 1.06 | up   | 1.38 | down | 1.86 | up   | 2   |
| Os.10657.1.S1_at   | LOC_Os03g63280 | regulatory protein, putative, expressed                                             | 1.45 | down | 1.00 | up   | 5.20  | up   | 2.10 | down | 1.16 | up   | 1.27 | up   | 2   |
| Os.10662.1.S1_at   | LOC_Os01g15320 | RALFL9 - Rapid ALKalinization Factor RALF family protein precursor, expressed       | 1.12 | down | 1.32 | up   | 5.54  | down | 1.14 | down | 2.12 | down | 1.09 | down | 2   |
| Os.10665.1.S1_at   | LOC_Os12g05550 | sialyltransferase family domain containing protein, expressed                       | 1.35 | down | 1.14 | up   | 4.77  | down | 1.07 | up   | 1.40 | down | 1.10 | up   | ABA |
| Os.10672.1.S1_at   | LOC_Os03g10080 | expressed protein                                                                   | 1.06 | up   | 1.07 | down | 3.02  | up   | 1.24 | down | 1.01 | up   | 1.01 | down | ABA |
| Os.10679.1.S1_at   | LOC_Os02g03740 | pyridoxal biosynthesis protein PDX2, putative, expressed                            | 1.55 | up   | 1.14 | up   | 1.07  | up   | 1.31 | up   | 2.01 | up   | 2.06 | up   | 2   |
| Os.10683.1.A1_s_at | LOC_Os02g51300 | AP2 domain containing protein, expressed                                            | 1.59 | up   | 1.10 | down | 2.68  | up   | 1.09 | down | 1.23 | up   | 1.25 | down | ABA |
| Os.10686.1.S1_at   | LOC_Os06g41770 | bZIP transcription factor domain containing protein, expressed                      | 1.05 | up   | 1.34 | up   | 2.03  | down | 1.00 | down | 1.06 | down | 1.00 | up   | ABA |
| Os.10689.1.S1_at   | LOC_Os06g02019 | cytochrome P450, putative, expressed                                                | 1.51 | up   | 1.60 | up   | 1.64  | down | 1.26 | up   | 3.42 | down | 2.55 | down | 2   |
| Os.10733.1.S1_at   | LOC_Os07g38130 | polygalacturonase inhibitor 1 precursor, putative, expressed                        | 1.42 | up   | 1.25 | up   | 7.12  | up   | 1.44 | up   | 1.32 | up   | 1.06 | up   | ABA |
| Os.10735.1.S1_at   | LOC_Os09g36860 | acyl carrier protein, putative, expressed                                           | 1.07 | down | 1.05 | down | 2.08  | down | 1.05 | down | 1.12 | down | 1.22 | up   | ABA |
| Os.10754.1.S1_at   | LOC_Os03g06520 | sulfate transporter, putative, expressed                                            | 1.11 | down | 1.25 | up   | 13.52 | up   | 1.42 | down | 1.02 | up   | 1.36 | up   | ABA |
| Os.10760.1.S1_at   | LOC_Os01g62110 | expressed protein                                                                   | 1.10 | up   | 1.10 | up   | 11.64 | down | 2.51 | down | 1.12 | up   | 3.79 | down | 3   |
| Os.10765.1.S1_at   | LOC_Os11g07960 | transferase family protein, putative, expressed                                     | 3.50 | up   | 1.42 | up   | 1.01  | down | 1.94 | up   | 2.48 | up   | 1.26 | up   | 2   |
| Os.10779.1.S1_at   | LOC_Os03g14690 | vacuolar ATP synthase 98 kDa subunit, putative, expressed                           | 1.02 | up   | 1.10 | down | 2.26  | up   | 1.01 | down | 1.74 | up   | 1.34 | up   | ABA |
| Os.10786.1.S1_at   | LOC_Os03g31550 | aldehyde oxidase, putative, expressed                                               | 1.04 | up   | 1.09 | up   | 2.32  | up   | 1.05 | up   | 1.42 | up   | 1.15 | up   | ABA |
| Os.10800.1.S1_at   | LOC_Os03g21900 | uroporphyrinogen decarboxylase, putative, expressed                                 | 1.14 | up   | 1.12 | up   | 3.11  | down | 1.21 | down | 1.58 | down | 1.37 | down | ABA |
| Os.10817.3.S1_x_at | LOC_Os11g32110 | auxin response factor, putative, expressed                                          | 2.27 | up   | 1.13 | up   | 1.22  | up   | 1.09 | down | 1.02 | up   | 1.08 | up   | IAA |
| Os.10820.1.S1_at   | LOC_Os10g39220 | tobamovirus multiplication protein, putative, expressed                             | 1.22 | up   | 1.16 | down | 3.53  | up   | 1.10 | up   | 1.66 | up   | 1.20 | up   | ABA |
| Os.10845.1.S1_s_at | LOC_Os03g60370 | histidine acid phosphatase, putative, expressed                                     | 1.01 | up   | 1.16 | down | 4.64  | up   | 1.08 | down | 2.73 | up   | 1.27 | up   | 2   |
| Os.10853.1.S1_at   | LOC_Os02g39930 | OsTIL-1 Temperature-induced lipocalin-1, expressed                                  | 1.35 | up   | 1.03 | up   | 3.05  | up   | 1.22 | down | 1.21 | up   | 1.10 | down | ABA |

|                    |                |                                                                                     |      |      |      |      |        |      |      |      |       |      |       |      |     |
|--------------------|----------------|-------------------------------------------------------------------------------------|------|------|------|------|--------|------|------|------|-------|------|-------|------|-----|
| Os.10855.1.S1_at   | LOC_Os03g56060 | CSLC9 - cellulose synthase-like family C, expressed                                 | 1.23 | up   | 1.20 | up   | 4.17   | up   | 1.29 | up   | 1.39  | up   | 1.08  | up   | ABA |
| Os.10859.1.S1_a_at | LOC_Os01g67290 | cyclin-related protein, putative, expressed                                         | 1.27 | up   | 1.11 | down | 2.31   | up   | 1.00 | down | 1.10  | up   | 1.12  | up   | ABA |
| Os.10860.2.S1_at   | LOC_Os04g44320 | transposon protein, putative, unclassified, expressed                               | 1.12 | down | 1.02 | down | 3.81   | down | 1.03 | up   | 1.48  | down | 2.30  | down | 2   |
| Os.10870.1.S1_at   | LOC_Os02g51890 | RNA recognition motif containing protein, putative, expressed                       | 1.39 | up   | 1.23 | down | 4.17   | up   | 1.52 | up   | 2.15  | up   | 1.74  | down | 2   |
| Os.10872.1.S1_at   | LOC_Os07g09420 | ATPase, putative, expressed                                                         | 2.08 | up   | 1.44 | up   | 1.70   | up   | 1.12 | up   | 2.96  | up   | 2.16  | up   | 3   |
| Os.10884.1.S1_at   | LOC_Os03g58790 | ATPase, putative, expressed                                                         | 1.55 | up   | 1.36 | up   | 2.32   | down | 1.18 | up   | 4.19  | up   | 1.07  | up   | 2   |
| Os.10926.1.S1_at   | LOC_Os07g14850 | CESA6 - cellulose synthase, expressed                                               | 1.09 | down | 1.07 | down | 2.15   | down | 1.15 | down | 1.58  | down | 1.31  | up   | ABA |
| Os.10930.1.S1_at   | LOC_Os02g41670 | phenylalanine ammonia-lyase, putative, expressed                                    | 1.01 | down | 1.39 | up   | 14.26  | down | 1.31 | up   | 1.25  | down | 2.72  | up   | 2   |
| Os.10933.1.S1_at   | LOC_Os01g50910 | late embryogenesis abundant protein, group 3, putative, expressed                   | 1.04 | up   | 1.07 | up   | 98.33  | up   | 1.73 | down | 3.79  | up   | 2.90  | up   | 3   |
| Os.10937.1.S1_at   | LOC_Os03g09250 | inositol-3-phosphate synthase, putative, expressed                                  | 1.12 | down | 1.14 | down | 3.97   | up   | 1.01 | down | 1.45  | up   | 1.09  | up   | ABA |
| Os.10956.1.S1_at   | LOC_Os01g62370 | ENTH domain containing protein, expressed                                           | 1.04 | down | 1.18 | down | 2.25   | up   | 1.04 | up   | 1.13  | down | 1.41  | down | ABA |
| Os.10960.1.S1_at   | LOC_Os09g39670 | oxidoreductase, short chain dehydrogenase/reductase family domain containing family | 1.08 | down | 1.19 | down | 2.12   | down | 1.07 | down | 1.29  | down | 1.06  | down | ABA |
| Os.10972.1.S1_at   | LOC_Os01g65670 | amino acid transporter, putative, expressed                                         | 1.15 | down | 1.35 | down | 2.81   | up   | 1.97 | down | 1.38  | up   | 1.63  | down | ABA |
| Os.10972.2.S1_x_at | LOC_Os01g65670 | amino acid transporter, putative, expressed                                         | 1.04 | down | 1.29 | down | 4.37   | up   | 1.33 | down | 1.36  | up   | 1.18  | down | ABA |
| Os.10982.1.S1_at   | LOC_Os02g46170 | senescence-associated protein-related                                               | 1.65 | up   | 1.92 | up   | 5.82   | up   | 2.19 | down | 2.19  | down | 3.19  | down | 4   |
| Os.10991.1.S1_at   | LOC_Os06g13810 | pyrophosphate-fructose 6-phosphate 1-phosphotransferase subunit beta, putative, exp | 1.03 | down | 1.09 | up   | 2.08   | down | 1.04 | up   | 1.31  | down | 1.11  | down | ABA |
| Os.11018.1.S1_at   | LOC_Os08g33710 | ribonuclease T2 family domain containing protein, expressed                         | 1.11 | up   | 1.24 | down | 6.31   | up   | 1.17 | down | 2.67  | up   | 1.12  | up   | 2   |
| Os.11039.1.S1_s_at | LOC_Os04g01740 | heat shock protein, putative, expressed                                             | 1.75 | down | 1.07 | down | 1.64   | up   | 1.14 | down | 18.55 | up   | 6.49  | up   | 2   |
| Os.11039.3.S1_at   | LOC_Os04g01740 | heat shock protein, putative, expressed                                             | 1.04 | down | 1.00 | up   | 1.33   | up   | 1.02 | down | 18.99 | up   | 10.08 | up   | 2   |
| Os.11040.1.S1_x_at | LOC_Os10g31320 | retrotransposon protein, putative, unclassified, expressed                          | 1.15 | down | 1.18 | down | 3.90   | up   | 1.06 | down | 1.13  | up   | 1.66  | up   | ABA |
| Os.11053.1.S1_at   | LOC_Os08g36440 | HVA22, putative, expressed                                                          | 1.47 | up   | 1.08 | up   | 110.29 | up   | 1.02 | down | 1.16  | down | 1.27  | down | ABA |
| Os.11053.1.S1_s_at | LOC_Os08g36440 | HVA22, putative, expressed                                                          | 1.01 | down | 1.21 | up   | 44.45  | up   | 1.11 | down | 1.07  | down | 1.24  | down | ABA |
| Os.11061.1.S1_at   | LOC_Os10g05210 | OsFBX368 - F-box domain containing protein, expressed                               | 1.38 | up   | 1.01 | down | 2.47   | up   | 1.10 | up   | 1.27  | up   | 1.27  | up   | ABA |
| Os.11064.1.S1_a_at | LOC_Os10g25010 | OsCML8 - Calmodulin-related calcium sensor protein, expressed                       | 1.06 | up   | 1.30 | down | 3.85   | up   | 1.01 | down | 1.53  | up   | 1.16  | down | ABA |
| Os.11076.1.S1_at   | LOC_Os12g43550 | ras-related protein, putative, expressed                                            | 1.12 | down | 1.18 | down | 2.18   | up   | 1.15 | up   | 1.41  | up   | 1.01  | up   | ABA |
| Os.11092.1.S1_at   | LOC_Os04g32950 | calreticulin precursor protein, putative, expressed                                 | 1.15 | down | 1.01 | down | 2.31   | down | 1.02 | up   | 1.35  | down | 1.10  | up   | ABA |
| Os.11106.1.S1_at   | LOC_Os06g46900 | phosphosulfolactate synthase-related protein, putative, expressed                   | 1.07 | down | 1.10 | down | 11.00  | up   | 1.02 | up   | 1.42  | up   | 1.35  | down | ABA |
| Os.11129.1.S1_at   | LOC_Os10g35840 | shikimate/quinic acid 5-dehydrogenase, putative, expressed                          | 1.71 | up   | 1.19 | up   | 3.04   | down | 1.24 | down | 1.59  | down | 1.29  | down | ABA |
| Os.11139.1.S1_at   | LOC_Os05g49880 | lactate/malate dehydrogenase, putative, expressed                                   | 1.06 | down | 1.06 | up   | 2.04   | down | 1.04 | up   | 1.11  | down | 1.05  | down | ABA |
| Os.11143.1.S1_at   | LOC_Os03g51980 | expressed protein                                                                   | 1.06 | up   | 2.40 | up   | 6.95   | up   | 1.41 | up   | 1.26  | down | 2.02  | down | 3   |
| Os.11151.1.S1_a_at | LOC_Os01g61670 | ureidoglycolate hydrolase, putative, expressed                                      | 1.06 | down | 1.14 | down | 2.36   | up   | 1.09 | down | 1.32  | up   | 1.31  | up   | ABA |
| Os.11154.1.S1_a_at | LOC_Os03g06705 | 3-ketoacyl-CoA synthase, putative, expressed                                        | 1.17 | up   | 1.29 | up   | 1.42   | down | 4.07 | up   | 1.56  | down | 1.00  | up   | ACC |
| Os.11164.1.S1_at   | LOC_Os07g03279 | SCP-like extracellular protein, expressed                                           | 1.12 | down | 1.21 | up   | 1.47   | down | 1.34 | up   | 1.16  | down | 1.78  | up   | ABA |
| Os.11166.1.S1_s_at | LOC_Os01g09830 | OsGrx_A2 - glutaredoxin subgroup III, expressed                                     | 1.55 | down | 1.07 | down | 2.41   | down | 1.15 | up   | 1.30  | down | 1.62  | up   | ABA |
| Os.11183.1.S1_s_at | LOC_Os06g18000 | protein kinase domain containing protein, expressed                                 | 1.04 | down | 1.05 | up   | 3.01   | down | 1.18 | up   | 1.04  | down | 1.12  | down | ABA |
| Os.11185.1.S1_a_at | LOC_Os02g17500 | transporter family protein, putative, expressed                                     | 1.04 | up   | 1.14 | down | 2.63   | up   | 1.14 | down | 1.18  | up   | 1.36  | up   | ABA |
| Os.11193.1.S1_at   | LOC_Os03g55240 | cytochrome P450, putative, expressed                                                | 1.11 | up   | 1.50 | up   | 2.65   | up   | 1.53 | down | 2.99  | up   | 1.16  | down | 2   |
| Os.11195.1.S1_at   | LOC_Os07g17330 | B12D protein, putative, expressed                                                   | 1.10 | up   | 1.02 | down | 1.39   | up   | 1.05 | up   | 2.83  | up   | 2.60  | up   | 2   |
| Os.11197.2.S1_x_at | LOC_Os09g30438 | expressed protein                                                                   | 1.22 | up   | 1.28 | down | 2.53   | down | 1.01 | up   | 4.01  | up   | 1.16  | up   | 2   |
| Os.11198.1.S1_a_at | LOC_Os07g43940 | X8 domain containing protein, expressed                                             | 1.12 | down | 1.02 | up   | 2.63   | up   | 1.07 | down | 1.03  | up   | 1.08  | down | ABA |
| Os.11198.3.S1_x_at | LOC_Os07g43940 | X8 domain containing protein, expressed                                             | 1.11 | up   | 1.15 | up   | 3.25   | up   | 1.23 | down | 1.07  | up   | 1.46  | down | ABA |
| Os.11202.1.S1_at   | LOC_Os08g06100 | O-methyltransferase, putative, expressed                                            | 1.00 | up   | 1.00 | up   | 2.16   | down | 1.11 | down | 1.30  | down | 1.05  | down | ABA |
| Os.11212.1.S1_at   | LOC_Os07g18750 | LTPL42 - Protease inhibitor/seed storage/LTP family protein precursor, expressed    | 1.09 | down | 1.08 | up   | 3.19   | down | 1.16 | down | 1.70  | down | 1.97  | down | ABA |
| Os.11219.1.S1_at   | LOC_Os03g17084 | Core histone H2A                                                                    | 1.66 | down | 1.22 | down | 2.31   | up   | 1.08 | up   | 1.22  | up   | 1.14  | down | ABA |
| Os.11222.1.S1_at   | LOC_Os01g40630 | uncharacterized protein PA4923, putative, expressed                                 | 2.39 | up   | 1.31 | up   | 2.84   | down | 1.37 | down | 1.57  | down | 1.05  | up   | 2   |
| Os.11222.2.S1_x_at | LOC_Os01g40630 | uncharacterized protein PA4923, putative, expressed                                 | 2.65 | up   | 1.41 | up   | 2.59   | down | 1.60 | down | 1.57  | down | 1.03  | up   | 2   |
| Os.11225.1.S1_at   | LOC_Os07g40850 | retrotransposon protein, putative, unclassified, expressed                          | 1.14 | up   | 1.44 | up   | 4.73   | up   | 1.23 | down | 1.39  | up   | 1.16  | up   | ABA |
| Os.11240.1.S1_at   | LOC_Os01g03914 | cation efflux family protein, putative, expressed                                   | 1.01 | down | 1.00 | up   | 3.50   | up   | 1.07 | up   | 1.07  | up   | 1.04  | down | ABA |
| Os.11241.1.S1_at   | LOC_Os11g03240 | MATE efflux family protein, putative, expressed                                     | 2.18 | down | 1.31 | down | 1.50   | down | 1.07 | up   | 1.67  | down | 1.06  | up   | IAA |
| Os.11249.1.S1_at   | LOC_Os05g15630 | membrane associated DUF588 domain containing protein, putative, expressed           | 1.19 | up   | 1.24 | up   | 2.91   | up   | 1.56 | down | 1.20  | down | 1.32  | down | ABA |
| Os.11250.1.S1_at   | LOC_Os02g13800 | HSF-type DNA-binding domain containing protein, expressed                           | 1.01 | up   | 1.66 | down | 36.43  | up   | 1.31 | down | 1.36  | up   | 1.08  | down | ABA |
| Os.11252.1.S1_at   | LOC_Os02g37160 | heavy metal transport/detoxification protein, putative, expressed                   | 1.62 | down | 1.31 | up   | 2.67   | down | 1.28 | up   | 1.07  | up   | 1.13  | down | ABA |
| Os.11260.1.S1_at   | LOC_Os05g31670 | AWPM-19-like membrane family protein, putative, expressed                           | 1.04 | down | 1.02 | down | 4.40   | up   | 1.02 | down | 1.24  | up   | 1.17  | up   | ABA |
| Os.11266.1.S1_at   | LOC_Os04g27060 | oxidoreductase, aldo/keto reductase family protein, putative, expressed             | 3.92 | up   | 1.30 | down | 1.14   | down | 1.09 | up   | 11.94 | up   | 2.07  | up   | 3   |
| Os.11284.1.S1_at   | LOC_Os08g01760 | dehydrogenase, putative, expressed                                                  | 1.23 | up   | 1.26 | down | 1.36   | up   | 1.20 | up   | 2.14  | up   | 1.88  | up   | SA  |

|                    |                |                                                                                    |      |      |      |      |       |      |      |      |      |      |      |      |     |
|--------------------|----------------|------------------------------------------------------------------------------------|------|------|------|------|-------|------|------|------|------|------|------|------|-----|
| Os.11286.1.A1_at   | LOC_Os04g13140 | vignain precursor, putative, expressed                                             | 2.13 | down | 4.87 | down | 4.69  | down | 1.83 | down | 2.53 | up   | 1.33 | up   | 4   |
| Os.11287.1.S1_at   | LOC_Os06g50920 | protein kinase family protein, putative, expressed                                 | 1.02 | up   | 1.38 | up   | 2.69  | up   | 1.38 | up   | 2.63 | up   | 2.12 | up   | 3   |
| Os.11296.1.S1_a_at | LOC_Os09g11460 | AP2 domain containing protein, expressed                                           | 1.00 | up   | 1.45 | up   | 2.34  | down | 2.74 | up   | 1.15 | up   | 1.92 | down | 2   |
| Os.11300.2.S1_at   | LOC_Os10g38910 | expressed protein                                                                  | 1.32 | up   | 1.31 | up   | 2.33  | down | 1.14 | down | 1.24 | down | 1.45 | down | ABA |
| Os.11303.1.S1_at   | LOC_Os01g72170 | glutathione S-transferase, putative, expressed                                     | 1.35 | up   | 1.13 | up   | 1.99  | down | 1.01 | up   | 2.47 | up   | 1.26 | down | SA  |
| Os.11303.1.S1_s_at | LOC_Os01g72170 | glutathione S-transferase, putative, expressed                                     | 1.41 | up   | 1.07 | up   | 1.99  | down | 1.01 | down | 2.54 | up   | 1.01 | down | SA  |
| Os.11305.1.S1_at   | LOC_Os12g29400 | GRAM domain containing protein, expressed                                          | 1.29 | down | 1.31 | down | 55.52 | up   | 1.62 | down | 4.70 | up   | 1.06 | up   | 2   |
| Os.11307.1.S1_at   | LOC_Os06g40440 | expressed protein                                                                  | 1.02 | up   | 1.06 | down | 3.18  | down | 1.01 | up   | 1.26 | down | 1.11 | up   | ABA |
| Os.11309.1.S1_x_at | LOC_Os05g04490 | peroxidase precursor, putative, expressed                                          | 1.13 | down | 1.52 | up   | 4.87  | down | 1.42 | up   | 1.24 | down | 1.37 | down | ABA |
| Os.1131.1.S1_at    | LOC_Os06g16350 | peroxidase precursor, putative, expressed                                          | 1.01 | up   | 1.13 | up   | 3.76  | up   | 1.20 | down | 1.50 | up   | 1.25 | down | ABA |
| Os.1131.2.S1_x_at  | LOC_Os06g16350 | peroxidase precursor, putative, expressed                                          | 1.42 | up   | 1.25 | up   | 4.29  | up   | 1.33 | down | 1.40 | up   | 1.16 | down | ABA |
| Os.11323.1.S1_at   | LOC_Os03g20120 | glycosyl transferase 8 domain containing protein, putative, expressed              | 1.08 | down | 1.51 | up   | 2.30  | up   | 1.26 | down | 1.77 | down | 1.07 | up   | ABA |
| Os.11327.1.S1_at   | LOC_Os03g18120 | proteins of unknown function domain containing protein, expressed                  | 1.03 | down | 1.03 | up   | 2.39  | up   | 1.47 | up   | 1.59 | up   | 1.49 | up   | ABA |
| Os.11330.1.S2_at   | AK105524       | Oryza sativa aquaporin (PIP2a) mRNA, complete cds                                  | 1.03 | up   | 1.20 | up   | 2.21  | down | 1.66 | down | 1.42 | up   | 2.65 | up   | 2   |
| Os.11331.1.S1_at   | LOC_Os08g10500 | Oryza sativa Japonica Group cDNA clone:001-105-E11, full insert sequence.          | 1.04 | up   | 1.01 | up   | 21.10 | up   | 1.66 | down | 2.00 | up   | 1.27 | down | ABA |
| Os.11334.1.S1_x_at | LOC_Os09g25090 | CAMK_KIN1/SNF1/Nim1_like.34 - CAMK includes calcium/calmodulin dependent protein   | 1.16 | up   | 1.17 | up   | 12.06 | up   | 1.41 | up   | 3.35 | up   | 1.46 | down | 2   |
| Os.11335.1.S1_at   | LOC_Os04g33450 | expressed protein                                                                  | 1.32 | up   | 1.10 | up   | 7.71  | down | 1.34 | down | 1.80 | down | 1.14 | down | ABA |
| Os.11335.3.S1_x_at | LOC_Os01g52260 | serine acetyltransferase protein, putative, expressed                              | 3.00 | up   | 1.14 | down | 6.60  | up   | 1.07 | up   | 7.17 | up   | 2.02 | up   | 4   |
| Os.11354.1.S1_at   | LOC_Os04g51460 | glycosyl hydrolases family 16, putative, expressed                                 | 3.00 | up   | 1.96 | up   | 5.39  | up   | 1.83 | up   | 2.07 | up   | 1.34 | up   | 3   |
| Os.11356.1.A1_at   | LOC_Os02g12670 | protein kinase family protein, putative, expressed                                 | 1.06 | up   | 1.06 | down | 2.47  | up   | 1.29 | down | 1.16 | up   | 1.04 | up   | ABA |
| Os.11364.1.S1_at   | LOC_Os12g33080 | 2-oxoglutarate/malate translocator, chloroplast precursor, putative, expressed     | 1.00 | down | 1.01 | down | 2.97  | down | 1.04 | down | 1.55 | down | 1.11 | down | ABA |
| Os.11365.1.S1_at   | LOC_Os02g52210 | zinc finger, C3HC4 type domain containing protein, expressed                       | 1.08 | up   | 1.36 | down | 9.85  | up   | 1.02 | down | 1.32 | up   | 3.17 | up   | 2   |
| Os.11368.1.S1_at   | LOC_Os02g37800 | lecithin:cholesterol acyltransferase, putative, expressed                          | 1.10 | up   | 1.01 | up   | 2.08  | down | 1.27 | down | 1.06 | down | 1.22 | up   | ABA |
| Os.11383.1.S1_a_at | LOC_Os07g22400 | POLA3 - Putative DNA polymerase alpha complex subunit, expressed                   | 1.26 | down | 1.02 | down | 5.05  | down | 1.09 | down | 2.58 | down | 1.79 | down | 2   |
| Os.11385.1.S1_a_at | LOC_Os11g34270 | ubiquitin carboxyl-terminal hydrolase domain containing protein, expressed         | 1.28 | up   | 1.01 | up   | 3.95  | up   | 1.02 | down | 1.25 | up   | 1.50 | down | ABA |
| Os.11392.2.S1_at   | LOC_Os02g07820 | DUF581 domain containing protein, expressed                                        | 1.14 | down | 1.16 | up   | 4.58  | down | 1.34 | down | 1.34 | down | 1.28 | down | ABA |
| Os.11393.1.S1_at   | LOC_Os06g47200 | LTP185 - Protease inhibitor/seed storage/LTP family protein precursor, expressed   | 1.25 | up   | 1.15 | down | 3.55  | up   | 1.01 | up   | 3.95 | up   | 1.30 | up   | 2   |
| Os.11393.1.S2_at   | LOC_Os06g47200 | LTP185 - Protease inhibitor/seed storage/LTP family protein precursor, expressed   | 1.06 | up   | 1.09 | down | 2.11  | up   | 1.01 | up   | 1.85 | up   | 1.18 | up   | ABA |
| Os.11407.1.S1_at   | LOC_Os04g57550 | amine oxidase, flavin-containing, domain containing protein, expressed             | 1.43 | up   | 1.13 | up   | 3.54  | up   | 1.22 | up   | 3.49 | up   | 2.02 | up   | 3   |
| Os.11408.1.S1_at   | LOC_Os09g37100 | phospholipase D, putative, expressed                                               | 1.01 | down | 1.12 | up   | 5.49  | up   | 1.65 | down | 1.13 | down | 1.43 | down | ABA |
| Os.11408.1.S2_at   | LOC_Os09g37100 | phospholipase D, putative, expressed                                               | 1.00 | down | 1.05 | up   | 8.13  | up   | 1.23 | down | 1.37 | up   | 1.14 | up   | ABA |
| Os.11419.1.S1_at   | LOC_Os03g11910 | DnaK family protein, putative, expressed                                           | 1.15 | down | 1.05 | down | 5.01  | up   | 1.05 | down | 1.58 | up   | 1.17 | down | ABA |
| Os.11421.1.S1_at   | LOC_Os03g58170 | stem-specific protein TSJT1, putative, expressed                                   | 1.12 | up   | 1.02 | up   | 7.32  | up   | 1.12 | up   | 1.58 | up   | 1.04 | down | ABA |
| Os.11421.2.S1_x_at | LOC_Os03g58170 | stem-specific protein TSJT1, putative, expressed                                   | 1.00 | up   | 1.04 | down | 7.13  | up   | 1.05 | down | 1.54 | up   | 1.37 | down | ABA |
| Os.11423.1.S1_at   | LOC_Os11g17610 | expressed protein                                                                  | 1.06 | down | 1.05 | down | 3.97  | up   | 1.17 | up   | 1.34 | up   | 1.23 | up   | ABA |
| Os.11443.1.S1_a_at | LOC_Os01g65630 | expressed protein                                                                  | 1.28 | down | 1.24 | up   | 3.91  | down | 1.63 | down | 1.30 | down | 1.80 | down | ABA |
| Os.11450.1.S1_at   | LOC_Os01g52110 | RING finger and CHY zinc finger domain-containing protein 1, putative, expressed   | 1.21 | up   | 1.16 | down | 18.58 | up   | 1.00 | down | 1.81 | up   | 1.39 | down | ABA |
| Os.11450.1.S2_a_at | LOC_Os01g52110 | RING finger and CHY zinc finger domain-containing protein 1, putative, expressed   | 1.11 | up   | 1.04 | down | 17.02 | up   | 1.28 | up   | 1.76 | up   | 1.17 | down | ABA |
| Os.11450.1.S3_a_at | LOC_Os01g52110 | RING finger and CHY zinc finger domain-containing protein 1, putative, expressed   | 1.10 | up   | 1.05 | down | 11.84 | up   | 1.31 | up   | 1.64 | up   | 1.28 | down | ABA |
| Os.11460.1.S1_at   | LOC_Os07g46490 | phosphatidylinositol-4-phosphate 5-kinase, putative, expressed                     | 2.19 | up   | 1.00 | down | 2.20  | down | 1.14 | down | 1.20 | down | 1.17 | down | 2   |
| Os.11464.1.S1_at   | LOC_Os03g41510 | oxidoreductase, aldo/keto reductase family protein, putative, expressed            | 1.13 | up   | 1.03 | up   | 2.09  | down | 1.18 | down | 1.35 | down | 1.27 | down | ABA |
| Os.11471.1.S1_at   | LOC_Os04g54610 | Conserved hypothetical protein                                                     | 1.15 | up   | 2.78 | up   | 1.00  | up   | 3.44 | down | 1.26 | up   | 5.26 | up   | 3   |
| Os.11474.1.S1_at   | LOC_Os02g51350 | OsFBK10 - F-box domain and kelch repeat containing protein, expressed              | 1.06 | up   | 1.18 | down | 2.51  | up   | 1.20 | up   | 2.24 | up   | 1.49 | up   | 2   |
| Os.11491.1.S1_at   | LOC_Os03g19290 | mitochondrial import inner membrane translocase subunit Tim17, putative, expressed | 1.29 | up   | 1.14 | up   | 75.29 | up   | 1.80 | down | 1.04 | up   | 1.08 | up   | ABA |
| Os.11493.1.A1_at   | LOC_Os05g35580 | amidophosphoribosyltransferase, chloroplast precursor, putative, expressed         | 1.28 | up   | 1.22 | up   | 3.77  | down | 1.17 | up   | 1.22 | down | 1.10 | down | ABA |
| Os.11520.1.S1_at   | AK288438       | Oryza sativa Japonica Group cDNA, clone: J090034C21, full insert sequence.         | 1.10 | down | 1.27 | down | 3.08  | down | 1.49 | down | 1.36 | down | 2.44 | down | 2   |
| Os.1153.1.S1_at    | LOC_Os01g15830 | peroxidase precursor, putative, expressed                                          | 1.18 | up   | 1.02 | down | 1.93  | up   | 1.20 | down | 1.23 | up   | 2.30 | up   | JA  |
| Os.11530.1.S1_at   | LOC_Os04g31820 | hypothetical protein                                                               | 1.08 | down | 1.03 | down | 2.09  | down | 1.26 | down | 1.44 | down | 1.23 | down | ABA |
| Os.11534.1.S1_at   | LOC_Os05g10670 | zinc finger CCH type family protein, putative, expressed                           | 1.17 | up   | 1.24 | down | 11.03 | up   | 1.10 | up   | 1.33 | up   | 1.78 | down | ABA |
| Os.11546.1.S1_at   | LOC_Os06g35520 | peroxidase precursor, putative, expressed                                          | 2.06 | down | 1.03 | up   | 1.66  | down | 2.73 | up   | 1.89 | up   | 4.87 | up   | 3   |
| Os.11547.1.S1_s_at | LOC_Os06g48030 | peroxidase precursor, putative, expressed                                          | 1.01 | up   | 1.60 | up   | 4.23  | up   | 1.36 | up   | 1.21 | up   | 1.60 | down | ABA |
| Os.11548.1.S1_at   | LOC_Os03g55420 | peroxidase precursor, putative, expressed                                          | 1.44 | down | 1.06 | up   | 5.27  | up   | 1.98 | up   | 1.57 | up   | 1.59 | up   | ABA |
| Os.11549.1.S1_at   | LOC_Os12g02080 | peroxidase precursor, putative, expressed                                          | 1.13 | down | 1.57 | up   | 2.51  | up   | 1.40 | down | 1.86 | up   | 1.18 | down | ABA |
| Os.11551.1.S1_at   | LOC_Os05g04410 | peroxidase precursor, putative, expressed                                          | 1.05 | up   | 1.19 | down | 2.28  | down | 1.52 | up   | 1.01 | up   | 2.32 | up   | 2   |
| Os.11552.1.S1_at   | LOC_Os04g59150 | peroxidase precursor, putative, expressed                                          | 1.23 | up   | 1.11 | up   | 3.50  | down | 1.27 | up   | 2.35 | down | 1.97 | up   | 2   |

|                    |                |                                                                                       |      |      |      |      |       |      |      |      |       |      |      |      |     |
|--------------------|----------------|---------------------------------------------------------------------------------------|------|------|------|------|-------|------|------|------|-------|------|------|------|-----|
| Os.11552.1.S2_at   | LOC_Os04g59150 | peroxidase precursor, putative, expressed                                             | 1.05 | up   | 1.23 | up   | 2.55  | down | 1.58 | up   | 1.91  | down | 2.12 | up   | 2   |
| Os.11553.1.S1_at   | LOC_Os03g02939 | peroxidase precursor, putative, expressed                                             | 3.46 | down | 2.63 | down | 15.08 | down | 1.06 | down | 1.45  | down | 1.61 | down | 3   |
| Os.11556.1.S1_at   | LOC_Os07g48030 | peroxidase precursor, putative, expressed                                             | 2.69 | down | 1.24 | down | 22.56 | down | 1.16 | down | 6.52  | down | 1.20 | down | 3   |
| Os.11575.1.S1_a_at | LOC_Os03g46440 | BTBA4 - Bric-a-Brac,Tramtrack, Broad Complex BTB domain with Ankyrin repeat region    | 1.15 | down | 1.25 | down | 3.84  | down | 1.07 | up   | 1.14  | down | 1.32 | up   | ABA |
| Os.11575.3.S1_x_at | LOC_Os08g40480 | transposon protein, putative, Pong sub-class, expressed                               | 1.50 | down | 1.19 | down | 5.48  | down | 1.05 | up   | 1.06  | down | 1.53 | up   | ABA |
| Os.11578.1.S1_at   | LOC_Os08g40160 | thylakoid lumen protein, chloroplast precursor, putative, expressed                   | 1.13 | up   | 1.10 | up   | 3.18  | down | 1.07 | down | 1.66  | down | 1.32 | down | ABA |
| Os.11580.1.S1_at   | LOC_Os06g01972 | auxin-induced protein 5NG4, putative, expressed                                       | 1.63 | up   | 1.65 | up   | 10.40 | down | 1.12 | up   | 3.09  | down | 2.05 | up   | 3   |
| Os.11604.1.S1_at   | LOC_Os10g42190 | leucine rich repeat containing protein, expressed                                     | 1.56 | down | 1.35 | down | 2.29  | up   | 1.07 | up   | 1.19  | up   | 1.12 | down | ABA |
| Os.11610.1.S1_at   | LOC_Os02g42020 | expressed protein                                                                     | 1.17 | up   | 1.15 | down | 5.30  | up   | 1.13 | down | 1.83  | up   | 1.03 | down | ABA |
| Os.11610.2.S1_at   | LOC_Os02g42020 | expressed protein                                                                     | 1.02 | down | 1.61 | down | 2.20  | up   | 1.08 | down | 1.48  | up   | 1.35 | up   | ABA |
| Os.11622.1.S1_at   | LOC_Os06g01360 | homogentisate 1,2-dioxygenase, putative, expressed                                    | 1.12 | up   | 1.00 | down | 2.79  | up   | 1.27 | up   | 1.34  | up   | 1.24 | up   | ABA |
| Os.11634.1.S1_at   | LOC_Os02g05630 | protein phosphatase 2C, putative, expressed                                           | 1.24 | up   | 1.06 | down | 2.08  | up   | 1.04 | down | 1.03  | up   | 1.06 | down | ABA |
| Os.11651.1.S1_at   | NM_001060567   | Oryza sativa (japonica cultivar-group) Os04g0639200 (Os04g0639200) mRNA, complete cds | 1.68 | up   | 1.42 | down | 2.48  | up   | 1.10 | down | 1.35  | up   | 1.09 | up   | ABA |
| Os.11657.1.S1_at   | LOC_Os01g47760 | OsGrx_11 - glutaredoxin subgroup III, expressed                                       | 1.81 | up   | 1.20 | up   | 2.23  | up   | 1.16 | up   | 1.94  | up   | 1.51 | up   | ABA |
| Os.11665.1.S1_at   | LOC_Os01g58790 | GHMP kinases ATP-binding protein, putative, expressed                                 | 1.79 | down | 1.24 | down | 1.44  | down | 1.06 | down | 1.25  | down | 2.18 | up   | JA  |
| Os.11666.1.S1_at   | LOC_Os09g36200 | senescence-inducible chloroplast stay-green protein 1, putative, expressed            | 1.26 | down | 1.05 | down | 10.50 | up   | 1.01 | up   | 1.40  | up   | 4.37 | up   | 2   |
| Os.11666.1.S1_s_at | LOC_Os09g36200 | senescence-inducible chloroplast stay-green protein 1, putative, expressed            | 1.04 | up   | 1.03 | up   | 9.95  | up   | 1.13 | up   | 1.46  | up   | 4.18 | up   | 2   |
| Os.11704.1.S1_at   | LOC_Os03g58090 | expressed protein                                                                     | 1.02 | up   | 1.00 | up   | 2.11  | down | 1.06 | down | 1.25  | down | 1.26 | down | ABA |
| Os.11711.1.S1_at   | LOC_Os12g17880 | armadillo/beta-catenin repeat protein-related, putative, expressed                    | 1.10 | up   | 1.09 | down | 3.28  | down | 1.43 | up   | 1.19  | up   | 1.24 | down | ABA |
| Os.11717.1.S1_at   | LOC_Os01g50450 | expressed protein                                                                     | 1.18 | up   | 1.14 | down | 3.09  | up   | 1.23 | up   | 1.27  | up   | 1.13 | up   | ABA |
| Os.11724.2.S1_s_at | LOC_Os06g24730 | hydrolase, alpha/beta fold family domain containing protein, expressed                | 1.20 | up   | 1.25 | down | 7.67  | up   | 1.05 | up   | 1.16  | up   | 1.11 | up   | ABA |
| Os.11724.2.S2_s_at | LOC_Os06g24730 | hydrolase, alpha/beta fold family domain containing protein, expressed                | 1.25 | down | 1.19 | down | 4.09  | up   | 1.13 | up   | 1.31  | up   | 1.31 | up   | ABA |
| Os.11730.1.S1_at   | LOC_Os05g21180 | phosphatidic acid phosphatase-related, putative, expressed                            | 1.33 | up   | 1.09 | down | 3.29  | up   | 1.21 | up   | 1.54  | up   | 1.63 | up   | ABA |
| Os.11736.1.S1_at   | LOC_Os02g22100 | OsRhmbd6 - Putative Rhomboid homolog, expressed                                       | 1.25 | up   | 1.18 | down | 3.81  | down | 1.41 | down | 1.58  | down | 1.71 | down | ABA |
| Os.11752.1.S1_at   | LOC_Os04g35570 | Regulator of chromosome condensation domain containing protein, expressed             | 1.03 | up   | 1.11 | down | 2.23  | down | 1.10 | down | 1.14  | down | 1.31 | up   | ABA |
| Os.11757.1.S1_at   | LOC_Os03g48660 | DUF1336 domain containing protein, expressed                                          | 1.01 | down | 1.12 | down | 2.05  | up   | 1.01 | up   | 1.16  | up   | 1.28 | up   | ABA |
| Os.11766.1.S1_at   | LOC_Os07g36170 | chitin-inducible gibberellin-responsive protein, putative, expressed                  | 1.59 | up   | 1.01 | up   | 2.66  | up   | 1.01 | down | 1.57  | up   | 1.07 | down | ABA |
| Os.11771.1.S1_at   | LOC_Os06g12320 | transmembrane amino acid transporter protein, putative, expressed                     | 1.46 | up   | 1.41 | up   | 9.66  | down | 1.74 | down | 6.25  | down | 4.12 | up   | 3   |
| Os.11781.1.S1_at   | LOC_Os02g52780 | bZIP transcription factor, putative, expressed                                        | 1.19 | up   | 1.51 | down | 7.07  | up   | 1.31 | down | 1.52  | up   | 1.32 | up   | ABA |
| Os.11789.1.S1_at   | LOC_Os03g01880 | possible lysine decarboxylase domain containing protein, expressed                    | 4.75 | up   | 1.25 | down | 1.28  | up   | 2.13 | down | 1.63  | up   | 1.39 | up   | 2   |
| Os.11798.1.S1_at   | LOC_Os07g40290 | OsGH3.8 - Probable indole-3-acetic acid-amido synthetase, expressed                   | 6.94 | up   | 2.33 | up   | 1.09  | up   | 1.29 | up   | 1.11  | up   | 1.17 | down | 2   |
| Os.11803.1.A1_at   | AU056598       |                                                                                       | 1.66 | up   | 1.12 | up   | 2.83  | up   | 1.12 | down | 1.34  | up   | 1.08 | up   | ABA |
| Os.11808.1.S1_at   | LOC_Os03g06580 | MTN26L2 - MTN26 family protein precursor, expressed                                   | 1.31 | up   | 1.07 | down | 4.50  | up   | 1.16 | up   | 1.30  | up   | 1.02 | down | ABA |
| Os.11808.2.S1_at   | NM_187768      |                                                                                       | 2.26 | up   | 1.07 | up   | 11.88 | up   | 1.00 | up   | 1.01  | down | 1.07 | down | 2   |
| Os.11808.2.S1_x_at | LOC_Os03g06580 | MTN26L2 - MTN26 family protein precursor, expressed                                   | 1.14 | up   | 1.11 | down | 4.86  | up   | 1.05 | up   | 1.09  | up   | 1.09 | down | ABA |
| Os.11816.1.S1_at   | LOC_Os04g37490 | oxidoreductase, aldo/keto reductase family protein, putative, expressed               | 9.11 | up   | 1.19 | down | 4.26  | up   | 1.18 | down | 22.72 | up   | 1.18 | up   | 3   |
| Os.11818.1.S1_at   | LOC_Os10g26680 | pectinesterase, putative, expressed                                                   | 1.02 | down | 1.08 | down | 3.01  | up   | 1.50 | up   | 1.78  | up   | 1.28 | up   | ABA |
| Os.1182.1.S1_x_at  | LOC_Os01g03144 | white-brown complex homolog protein 7, putative, expressed                            | 1.19 | up   | 1.04 | down | 7.90  | up   | 1.20 | up   | 2.34  | up   | 1.40 | down | 2   |
| Os.11826.1.S1_at   | LOC_Os06g30130 | cysteine-rich receptor-like protein kinase 10 precursor, putative, expressed          | 1.14 | up   | 1.32 | down | 3.11  | up   | 1.18 | up   | 1.71  | up   | 1.33 | up   | ABA |
| Os.11827.1.S1_a_at | LOC_Os01g34480 | NAD dependent epimerase/dehydratase family protein, putative, expressed               | 1.74 | up   | 1.16 | down | 1.63  | up   | 1.16 | up   | 2.68  | up   | 1.46 | up   | SA  |
| Os.11829.1.S2_at   | LOC_Os01g25920 | expressed protein                                                                     | 1.42 | down | 1.37 | down | 3.28  | up   | 1.59 | down | 5.43  | up   | 1.09 | down | 2   |
| Os.11833.1.S1_at   | LOC_Os07g14610 | IAA-amino acid hydrolase ILR1-like 6 precursor, putative, expressed                   | 1.16 | down | 1.05 | down | 4.31  | up   | 1.52 | up   | 1.95  | up   | 1.07 | up   | ABA |
| Os.11844.1.S1_at   | LOC_Os01g37040 | retrotransposon protein, putative, Ty1-copia subclass, expressed                      | 1.23 | up   | 1.18 | up   | 4.06  | down | 1.17 | down | 1.45  | down | 1.04 | up   | ABA |
| Os.11855.1.S1_at   | LOC_Os02g44910 | transmembrane protein, putative, expressed                                            | 1.62 | up   | 1.07 | down | 4.40  | up   | 1.26 | up   | 1.42  | up   | 1.11 | up   | ABA |
| Os.11875.1.S1_a_at | LOC_Os12g18650 | Regulator of chromosome condensation domain containing protein, expressed             | 1.09 | up   | 1.25 | down | 3.38  | up   | 1.09 | up   | 1.26  | up   | 1.04 | up   | ABA |
| Os.11882.1.S1_at   | LOC_Os10g38040 | lysM domain containing protein, putative, expressed                                   | 1.11 | up   | 1.38 | up   | 2.13  | up   | 1.21 | up   | 2.36  | up   | 1.99 | up   | 2   |
| Os.11885.1.S1_at   | LOC_Os08g06010 | transporter, major facilitator family, putative, expressed                            | 1.22 | up   | 1.57 | down | 2.77  | up   | 1.07 | up   | 1.60  | up   | 1.41 | down | ABA |
| Os.1189.1.S1_at    | LOC_Os06g16370 | CCT/B-box zinc finger protein, putative, expressed                                    | 1.01 | down | 1.00 | up   | 3.83  | up   | 1.00 | down | 1.00  | up   | 1.02 | up   | ABA |
| Os.11897.1.S1_at   | LOC_Os03g61150 | expressed protein                                                                     | 1.20 | down | 1.39 | up   | 10.68 | up   | 1.94 | up   | 2.18  | up   | 2.72 | down | 3   |
| Os.11907.1.S1_at   | LOC_Os11g41600 | expressed protein                                                                     | 1.35 | up   | 2.06 | down | 5.14  | up   | 1.08 | up   | 1.78  | up   | 2.07 | up   | 3   |
| Os.11908.1.S1_s_at | LOC_Os11g03230 | nucleoside-triphosphatase, putative, expressed                                        | 1.01 | up   | 1.27 | down | 2.75  | down | 1.96 | down | 1.31  | up   | 2.05 | up   | 2   |
| Os.11912.1.S1_at   | LOC_Os09g25580 | monogalactosyldiacylglycerol synthase, putative, expressed                            | 1.01 | down | 1.05 | up   | 2.86  | down | 1.01 | down | 1.27  | down | 1.25 | up   | ABA |
| Os.11914.1.S1_at   | LOC_Os06g11240 | 12-oxophytodiene reductase, putative, expressed                                       | 5.81 | up   | 1.75 | up   | 2.00  | down | 1.21 | up   | 2.63  | up   | 3.71 | up   | 4   |
| Os.11935.1.S1_at   | LOC_Os02g32520 | ERD1 protein, chloroplast precursor, putative, expressed                              | 1.49 | up   | 1.12 | down | 6.58  | up   | 1.01 | up   | 1.25  | up   | 1.42 | up   | ABA |
| Os.11939.1.S1_at   | LOC_Os10g36000 | remorin C-terminal domain containing protein, putative, expressed                     | 1.39 | up   | 1.18 | down | 2.76  | up   | 1.79 | down | 1.20  | up   | 1.67 | down | ABA |

|                    |                |                                                                                    |       |      |      |      |        |      |      |      |       |      |      |      |     |
|--------------------|----------------|------------------------------------------------------------------------------------|-------|------|------|------|--------|------|------|------|-------|------|------|------|-----|
| Os.11942.1.S1_at   | LOC_Os04g48390 | uncharacterized membrane protein, putative, expressed                              | 1.26  | up   | 1.31 | down | 4.67   | up   | 1.69 | down | 1.26  | up   | 1.04 | up   | ABA |
| Os.11946.1.S1_at   | LOC_Os06g21380 | OsCtP3 - Putative C-terminal processing peptidase homologue, expressed             | 1.45  | up   | 1.86 | down | 6.57   | up   | 1.17 | up   | 1.67  | up   | 1.71 | up   | ABA |
| Os.11949.1.S1_at   | LOC_Os03g12350 | two-component response regulator, putative, expressed                              | 1.18  | up   | 1.20 | down | 2.52   | up   | 1.05 | up   | 1.32  | up   | 1.03 | up   | ABA |
| Os.11960.1.S1_at   | LOC_Os07g48160 | alpha-galactosidase precursor, putative, expressed                                 | 1.11  | up   | 1.09 | up   | 6.28   | up   | 1.11 | down | 1.21  | up   | 1.51 | down | ABA |
| Os.11963.1.S2_at   | LOC_Os04g02910 | membrane related protein CP5, putative, expressed                                  | 1.08  | down | 1.02 | down | 2.04   | down | 1.19 | down | 1.27  | down | 1.14 | up   | ABA |
| Os.11967.1.S1_at   | LOC_Os03g45170 | amino acid permease, putative, expressed                                           | 1.11  | down | 1.38 | down | 1.51   | down | 1.30 | up   | 1.21  | down | 2.01 | up   | JA  |
| Os.11970.1.S1_at   | LOC_Os09g20240 | DUF581 domain containing protein, expressed                                        | 1.05  | up   | 1.08 | down | 3.62   | down | 1.28 | up   | 1.39  | down | 1.33 | down | ABA |
| Os.11970.2.S1_x_at | LOC_Os09g20240 | DUF581 domain containing protein, expressed                                        | 1.01  | up   | 1.55 | down | 3.86   | down | 1.28 | up   | 1.57  | down | 1.20 | down | ABA |
| Os.11972.1.S1_at   | LOC_Os05g33010 | heat shock protein DnaJ, putative, expressed                                       | 1.02  | up   | 1.22 | up   | 2.02   | up   | 1.02 | up   | 1.20  | up   | 1.29 | down | ABA |
| Os.11982.1.S1_at   | LOC_Os07g07470 | transketolase, putative, expressed                                                 | 1.13  | up   | 1.00 | up   | 3.06   | up   | 1.06 | up   | 1.72  | up   | 1.78 | up   | ABA |
| Os.11999.1.S1_at   | LOC_Os05g02010 | expressed protein                                                                  | 1.18  | up   | 1.07 | up   | 3.15   | up   | 1.19 | up   | 1.41  | up   | 1.15 | up   | ABA |
| Os.12012.1.S1_at   | LOC_Os10g25290 | ZIM domain containing protein, putative, expressed                                 | 1.03  | up   | 1.84 | up   | 1.42   | up   | 1.12 | up   | 1.59  | up   | 5.18 | up   | JA  |
| Os.12021.1.S1_at   | LOC_Os12g16290 | isoflavone reductase, putative, expressed                                          | 1.88  | down | 1.77 | down | 4.93   | up   | 1.03 | down | 1.72  | up   | 1.05 | down | ABA |
| Os.12030.1.S1_at   | LOC_Os01g67480 | helix-loop-helix DNA-binding domain containing protein, expressed                  | 1.19  | up   | 1.05 | down | 2.07   | up   | 1.43 | up   | 1.78  | up   | 1.06 | down | ABA |
| Os.12034.2.S1_at   | LOC_Os09g39462 | nucleic acid binding protein, putative, expressed                                  | 2.45  | up   | 1.15 | up   | 1.17   | down | 1.11 | up   | 1.14  | up   | 1.18 | up   | IAA |
| Os.12035.1.S1_at   | LOC_Os02g50130 | hydrolase, NUDIX family, domain containing protein, expressed                      | 1.21  | down | 1.11 | down | 1.78   | down | 1.25 | down | 1.42  | up   | 2.03 | down | JA  |
| Os.12046.1.S1_at   | LOC_Os03g56370 | methyltransferase, putative, expressed                                             | 1.75  | up   | 1.44 | down | 3.75   | down | 1.17 | down | 1.22  | down | 1.05 | up   | ABA |
| Os.1205.1.S1_at    | LOC_Os01g12580 | late embryogenesis abundant protein, putative, expressed                           | 1.01  | down | 2.39 | up   | 904.00 | up   | 1.11 | down | 1.25  | up   | 1.23 | up   | 2   |
| Os.12058.1.S1_at   | LOC_Os02g49870 | expressed protein                                                                  | 1.04  | up   | 1.63 | down | 3.52   | down | 1.15 | down | 1.63  | down | 1.21 | down | ABA |
| Os.12074.1.S1_at   | LOC_Os07g09680 | ras-related protein, putative, expressed                                           | 1.06  | up   | 1.12 | down | 2.43   | up   | 1.04 | up   | 1.26  | up   | 1.00 | down | ABA |
| Os.12077.1.S1_at   | LOC_Os08g44270 | vignain precursor, putative, expressed                                             | 1.02  | up   | 1.19 | up   | 4.82   | up   | 1.05 | down | 1.25  | down | 1.69 | down | ABA |
| Os.12082.1.S1_at   | LOC_Os04g39350 | heavy metal associated domain containing protein, expressed                        | 1.34  | down | 1.13 | down | 2.03   | down | 1.01 | up   | 1.06  | down | 1.44 | down | ABA |
| Os.12092.2.S1_a_at | LOC_Os03g05620 | inorganic phosphate transporter, putative, expressed                               | 1.07  | up   | 1.16 | down | 2.31   | down | 1.09 | up   | 1.04  | down | 1.18 | down | ABA |
| Os.12094.1.S1_a_at | LOC_Os02g33820 | abscisic stress-ripening, putative, expressed                                      | 1.05  | down | 1.01 | up   | 2.45   | down | 1.00 | up   | 1.11  | down | 1.48 | down | ABA |
| Os.12134.1.S1_at   | LOC_Os04g45810 | homeobox associated leucine zipper, putative, expressed                            | 1.13  | down | 2.45 | down | 35.35  | up   | 1.49 | down | 1.46  | up   | 1.12 | down | 2   |
| Os.12138.1.A1_at   | AK062378       | Oryza sativa Japonica Group cDNA clone:001-102-B06, full insert sequence.          | 1.07  | down | 1.57 | up   | 5.31   | up   | 1.05 | up   | 1.59  | up   | 1.00 | up   | ABA |
| Os.12145.1.S1_at   | LOC_Os02g47470 | cytochrome P450, putative, expressed                                               | 1.71  | up   | 1.10 | up   | 6.96   | up   | 1.05 | up   | 1.04  | down | 1.93 | down | ABA |
| Os.1215.1.S1_at    | LOC_Os04g37500 | glutamate decarboxylase, putative, expressed                                       | 1.18  | down | 1.04 | up   | 2.55   | up   | 1.08 | up   | 1.16  | down | 1.54 | down | ABA |
| Os.12163.1.S1_at   | LOC_Os03g12510 | non-symbiotic hemoglobin 2, putative, expressed                                    | 1.76  | down | 1.17 | up   | 1.85   | up   | 1.80 | up   | 11.44 | up   | 7.25 | up   | 2   |
| Os.12167.1.S1_at   | LOC_Os02g44870 | dehydrin, putative, expressed                                                      | 1.04  | down | 1.13 | down | 7.54   | up   | 1.15 | down | 1.34  | up   | 1.75 | down | ABA |
| Os.12186.2.S1_at   | BGIOSFCE10264  |                                                                                    | 1.21  | down | 1.04 | up   | 2.20   | up   | 1.00 | up   | 1.01  | down | 1.01 | down | ABA |
| Os.12186.2.S1_x_at | LOC_Os03g21040 | stress responsive protein, putative, expressed                                     | 1.01  | down | 1.03 | up   | 3.10   | up   | 1.08 | down | 1.11  | down | 1.00 | down | ABA |
| Os.12187.1.S1_at   | LOC_Os11g10750 | OsSCP48 - Putative Serine Carboxypeptidase homologue, expressed                    | 1.30  | down | 1.09 | down | 3.84   | down | 1.03 | up   | 1.18  | down | 1.24 | down | ABA |
| Os.12191.1.S1_s_at | LOC_Os03g12510 | non-symbiotic hemoglobin 2, putative, expressed                                    | 1.55  | down | 1.20 | up   | 1.15   | up   | 1.37 | up   | 8.56  | up   | 5.18 | up   | 2   |
| Os.12199.1.S1_at   | LOC_Os01g66120 | No apical meristem protein, putative, expressed                                    | 1.52  | up   | 1.04 | down | 4.21   | up   | 1.17 | up   | 1.18  | up   | 1.80 | up   | ABA |
| Os.12200.1.S1_s_at | LOC_Os03g57200 | glutathione S-transferase, putative, expressed                                     | 7.99  | up   | 1.35 | up   | 5.54   | up   | 1.03 | down | 13.76 | up   | 4.59 | up   | 4   |
| Os.12216.2.S1_a_at | LOC_Os08g04210 | cysteine-rich repeat secretory protein 55 precursor, putative, expressed           | 1.24  | down | 1.34 | down | 19.49  | up   | 1.02 | down | 13.00 | up   | 1.32 | up   | 2   |
| Os.12219.1.S1_at   | LOC_Os01g59930 | NADH-cytochrome b5 reductase, putative, expressed                                  | 1.06  | down | 1.13 | up   | 2.29   | down | 1.09 | up   | 1.16  | down | 1.29 | up   | ABA |
| Os.12221.1.S1_at   | LOC_Os07g24000 | AWPM-19-like membrane family protein, putative, expressed                          | 1.40  | down | 1.39 | down | 70.17  | up   | 1.69 | down | 2.10  | up   | 1.15 | up   | 2   |
| Os.12223.2.S1_at   | LOC_Os03g53410 | protein kinase domain containing protein, expressed                                | 1.43  | down | 1.52 | up   | 6.99   | up   | 1.04 | down | 1.57  | up   | 1.71 | down | ABA |
| Os.12234.1.S1_s_at | LOC_Os10g40730 | expansin precursor, putative, expressed                                            | 1.10  | down | 1.15 | down | 3.10   | down | 1.14 | up   | 1.29  | down | 1.02 | down | ABA |
| Os.12251.1.S1_at   | LOC_Os03g49190 | oleosin, putative, expressed                                                       | 2.34  | down | 1.09 | down | 48.69  | up   | 1.01 | down | 1.06  | down | 1.06 | down | 2   |
| Os.12252.1.S1_at   | LOC_Os03g41060 | GASR2 - Gibberellin-regulated GASA/GAST/Snakin family protein precursor, putative, | 1.04  | down | 1.50 | down | 5.33   | up   | 1.52 | down | 1.01  | up   | 1.68 | down | ABA |
| Os.12253.1.S1_at   | LOC_Os01g45110 | anthocyanin 3-O-beta-glucosyltransferase, putative, expressed                      | 36.63 | up   | 1.53 | up   | 9.07   | up   | 1.28 | up   | 17.26 | up   | 1.63 | up   | 3   |
| Os.12275.1.S1_at   | LOC_Os04g57280 | expressed protein                                                                  | 1.00  | up   | 1.01 | up   | 16.81  | up   | 1.01 | up   | 1.00  | up   | 1.03 | up   | ABA |
| Os.12281.1.S1_at   | LOC_Os05g38150 | amino acid kinase, putative, expressed                                             | 1.12  | up   | 1.06 | down | 2.67   | up   | 1.22 | up   | 1.24  | up   | 1.04 | down | ABA |
| Os.12282.1.S1_a_at | LOC_Os11g08569 | cycloartenol synthase, putative, expressed                                         | 1.20  | down | 1.57 | down | 2.13   | down | 1.40 | up   | 1.01  | up   | 1.13 | up   | ABA |
| Os.12283.1.S1_at   | LOC_Os08g13920 | glycosyl hydrolases family 16, putative, expressed                                 | 1.10  | down | 1.38 | up   | 2.39   | down | 1.06 | down | 1.58  | down | 1.28 | up   | ABA |
| Os.12305.1.S1_at   | LOC_Os05g44050 | ras-related protein, putative, expressed                                           | 1.09  | up   | 1.00 | up   | 2.01   | up   | 1.01 | up   | 1.15  | up   | 1.16 | up   | ABA |
| Os.12309.1.S1_at   | LOC_Os03g40550 | kinase, pfkB family, putative, expressed                                           | 1.73  | up   | 1.58 | up   | 4.89   | down | 1.21 | down | 1.94  | down | 1.31 | down | ABA |
| Os.12312.1.S1_at   | LOC_Os01g69920 | histidine kinase, putative, expressed                                              | 1.06  | up   | 1.51 | down | 3.03   | up   | 1.01 | down | 1.26  | up   | 1.23 | up   | ABA |
| Os.12314.1.S1_at   | LOC_Os05g07650 | transmembrane 9 superfamily member, putative, expressed                            | 1.07  | up   | 1.36 | down | 2.85   | down | 1.19 | down | 1.53  | down | 1.16 | up   | ABA |
| Os.12326.1.S1_s_at | LOC_Os07g42160 | HD domain containing protein, putative, expressed                                  | 1.11  | down | 1.50 | down | 5.13   | up   | 1.05 | up   | 1.53  | up   | 1.10 | up   | ABA |
| Os.12329.1.S1_at   | LOC_Os01g65920 | F-box/LRR-repeat protein 2, putative, expressed                                    | 1.16  | up   | 1.06 | down | 3.11   | up   | 1.07 | down | 1.25  | up   | 1.31 | down | ABA |
| Os.12340.1.S1_at   | LOC_Os01g11730 | GDSL-like lipase/acylhydrolase, putative, expressed                                | 1.10  | up   | 1.66 | up   | 10.85  | down | 2.38 | up   | 3.19  | down | 1.63 | down | 3   |

|                    |                |                                                                                       |      |      |      |      |        |      |      |      |      |      |      |      |     |
|--------------------|----------------|---------------------------------------------------------------------------------------|------|------|------|------|--------|------|------|------|------|------|------|------|-----|
| Os.12342.1.S1_at   | LOC_Os12g04204 | expressed protein                                                                     | 1.03 | down | 1.22 | up   | 2.19   | up   | 1.10 | up   | 1.37 | up   | 1.22 | down | ABA |
| Os.12342.1.S2_at   | LOC_Os12g04204 | expressed protein                                                                     | 1.12 | up   | 1.25 | up   | 2.06   | up   | 1.15 | up   | 1.45 | up   | 1.08 | down | ABA |
| Os.12347.1.S1_x_at | LOC_Os11g04390 | RNA recognition motif containing protein, expressed                                   | 1.36 | up   | 1.11 | up   | 4.83   | up   | 1.18 | down | 1.14 | up   | 1.18 | down | ABA |
| Os.12363.1.S1_at   | LOC_Os04g58200 | protochlorophyllide reductase A, chloroplast precursor, putative, expressed           | 1.09 | up   | 1.01 | down | 13.27  | down | 1.65 | down | 2.80 | down | 1.46 | down | 2   |
| Os.12372.1.S1_s_at | LOC_Os08g06280 | LSD1 zinc finger domain containing protein, expressed                                 | 1.16 | down | 1.02 | down | 3.58   | down | 1.05 | down | 1.23 | down | 1.27 | down | ABA |
| Os.12372.2.S1_x_at | LOC_Os08g06280 | LSD1 zinc finger domain containing protein, expressed                                 | 1.15 | down | 1.10 | up   | 3.68   | down | 1.03 | down | 1.28 | down | 1.24 | down | ABA |
| Os.12374.1.S1_at   | LOC_Os12g42876 | 5-methyltetrahydropteroyltriglutamate--homocysteine methyltransferase, putative, expr | 1.01 | up   | 1.06 | up   | 2.13   | down | 1.02 | up   | 1.19 | down | 1.25 | up   | ABA |
| Os.12393.1.S2_a_at | LOC_Os06g50300 | heat shock protein, putative, expressed                                               | 1.19 | down | 1.09 | up   | 2.25   | down | 1.11 | up   | 1.20 | down | 1.23 | up   | ABA |
| Os.12393.2.S1_at   | LOC_Os08g01380 | 2Fe-2S iron-sulfur cluster binding domain containing protein, expressed               | 1.73 | up   | 1.00 | down | 3.94   | down | 1.83 | down | 2.42 | down | 1.54 | down | 2   |
| Os.12400.2.S1_x_at | LOC_Os08g30020 | membrane protein, putative, expressed                                                 | 1.28 | down | 1.09 | down | 3.95   | up   | 1.13 | down | 1.03 | up   | 4.32 | up   | 2   |
| Os.12400.4.S1_at   | LOC_Os08g30020 | membrane protein, putative, expressed                                                 | 1.22 | down | 1.15 | down | 2.96   | up   | 1.14 | down | 1.06 | down | 4.28 | up   | 2   |
| Os.12402.2.S1_x_at | LOC_Os05g44320 | WD domain, G-beta repeat domain containing protein, expressed                         | 1.06 | up   | 1.20 | up   | 2.33   | down | 1.19 | up   | 1.16 | down | 1.24 | down | ABA |
| Os.12403.1.S1_a_at | LOC_Os06g40360 | OsFBL30 - F-box domain and LRR containing protein, expressed                          | 1.05 | down | 1.12 | down | 1.15   | up   | 2.03 | up   | 1.03 | up   | 1.24 | down | ACC |
| Os.12412.1.S1_at   | LOC_Os02g16500 | arabinogalactan-protein (AGP16)                                                       | 1.13 | down | 1.25 | down | 2.79   | down | 1.19 | down | 1.69 | down | 1.52 | down | ABA |
| Os.12415.1.S1_at   | CT829836       | Oryza sativa (indica cultivar-group) cDNA clone:OSIGCSN080M19, full insert sequenc    | 2.54 | up   | 1.50 | up   | 383.95 | up   | 1.39 | up   | 2.29 | up   | 1.40 | down | 3   |
| Os.12419.1.S1_at   | AK062306       | expressed protein                                                                     | 2.69 | up   | 1.07 | up   | 4.90   | down | 1.26 | down | 1.67 | down | 1.23 | down | 2   |
| Os.12420.1.S1_at   | LOC_Os08g27720 | pirin, putative, expressed                                                            | 1.00 | up   | 1.88 | down | 1.98   | down | 1.03 | down | 2.23 | up   | 1.37 | up   | SA  |
| Os.12421.1.S1_at   | LOC_Os11g42960 | integral membrane protein TIGR01569 containing protein, expressed                     | 2.11 | down | 1.80 | down | 4.52   | down | 1.27 | up   | 1.47 | up   | 2.00 | up   | 3   |
| Os.12429.1.S1_at   | LOC_Os07g07040 | erythrocyte binding protein 3, putative, expressed                                    | 1.18 | down | 1.08 | down | 10.27  | up   | 1.02 | down | 1.08 | up   | 1.06 | down | ABA |
| Os.12440.1.S1_at   | AK243174       | expressed protein                                                                     | 1.22 | up   | 1.08 | down | 2.34   | up   | 1.38 | down | 1.05 | down | 1.13 | down | ABA |
| Os.12457.1.S1_at   | LOC_Os03g31679 | annexin A7, putative, expressed                                                       | 1.05 | down | 1.17 | up   | 4.80   | down | 1.13 | up   | 1.66 | down | 1.11 | down | ABA |
| Os.12475.1.S1_s_at | LOC_Os05g37470 | transmembrane amino acid transporter protein, putative, expressed                     | 1.19 | down | 1.14 | up   | 5.86   | down | 1.15 | down | 1.57 | down | 1.41 | down | ABA |
| Os.12501.1.S1_at   | LOC_Os01g55940 | OsGH3.2 - Probable indole-3-acetic acid-amido synthetase, expressed                   | 9.64 | up   | 1.47 | down | 1.18   | up   | 1.23 | up   | 5.74 | up   | 1.56 | up   | 2   |
| Os.12528.1.S1_x_at | LOC_Os03g31750 | pyruvate, phosphate dikinase, chloroplast precursor, putative, expressed              | 1.67 | down | 1.22 | down | 2.74   | up   | 2.21 | up   | 3.41 | up   | 1.32 | down | 3   |
| Os.12568.1.S1_at   | LOC_Os05g03820 | glutamate--cysteine ligase, chloroplast precursor, putative, expressed                | 1.51 | up   | 1.04 | up   | 1.71   | up   | 1.26 | up   | 2.24 | up   | 1.49 | up   | SA  |
| Os.12583.1.S1_at   | LOC_Os03g16440 | outer membrane protein, OMP85 family, putative, expressed                             | 1.08 | up   | 1.04 | up   | 2.24   | down | 1.00 | down | 1.44 | down | 1.19 | down | ABA |
| Os.12591.2.S1_x_at | LOC_Os11g10480 | dehydrogenase, putative, expressed                                                    | 1.15 | down | 1.00 | down | 2.54   | up   | 1.52 | up   | 1.75 | up   | 1.30 | up   | ABA |
| Os.12614.1.A1_at   | LOC_Os11g12320 | disease resistance protein RPM1, putative                                             | 1.39 | down | 1.46 | up   | 6.41   | down | 1.34 | up   | 1.48 | down | 1.49 | down | ABA |
| Os.12628.1.S1_at   | LOC_Os06g02380 | T-complex protein, putative, expressed                                                | 1.02 | down | 1.03 | down | 2.12   | down | 1.05 | down | 1.29 | down | 1.11 | down | ABA |
| Os.12633.1.S1_s_at | LOC_Os11g26790 | dehydrin, putative, expressed                                                         | 1.63 | up   | 3.65 | up   | 9.11   | up   | 1.11 | down | 1.21 | down | 1.01 | up   | 2   |
| Os.12644.1.S1_at   | LOC_Os07g41140 | receptor-like protein kinase precursor, putative, expressed                           | 1.10 | up   | 1.08 | down | 2.62   | up   | 1.33 | up   | 1.44 | up   | 1.23 | up   | ABA |
| Os.12645.1.S1_at   | LOC_Os03g27280 | CAMK_CAMK_like.19 - CAMK includes calcium/calmodulin dependent protein kinases, e     | 1.18 | up   | 1.13 | down | 6.59   | up   | 1.03 | up   | 1.93 | up   | 1.37 | up   | ABA |
| Os.12646.1.S1_at   | LOC_Os01g64970 | CAMK_CAMK_like.11 - CAMK includes calcium/calmodulin dependent protein kinases, e     | 1.13 | up   | 1.02 | up   | 2.00   | up   | 1.01 | up   | 1.11 | up   | 1.28 | down | ABA |
| Os.12654.1.S1_at   | LOC_Os09g39930 | tyrosine protein kinase domain containing protein, putative, expressed                | 1.01 | down | 1.01 | up   | 2.52   | up   | 1.01 | down | 1.13 | up   | 1.16 | up   | ABA |
| Os.12660.1.S1_at   | LOC_Os07g38800 | lectin-like receptor kinase, putative, expressed                                      | 1.23 | up   | 1.05 | down | 2.42   | down | 1.22 | down | 1.19 | down | 1.16 | down | ABA |
| Os.12664.1.S1_at   | LOC_Os07g35810 | TKL_IRAK_DUF26-ld.6 - DUF26 kinases have homology to DUF26 containing loci, exp       | 1.41 | down | 1.33 | up   | 8.51   | down | 1.90 | up   | 1.22 | down | 1.64 | down | ABA |
| Os.12669.1.S1_at   | LOC_Os09g03620 | wall-associated receptor kinase-like 20 precursor, putative, expressed                | 1.11 | up   | 1.08 | down | 2.68   | up   | 1.00 | down | 1.10 | up   | 1.06 | down | ABA |
| Os.12686.1.S1_at   | LOC_Os05g16824 | SHR5-receptor-like kinase, putative, expressed                                        | 1.17 | up   | 1.04 | down | 1.43   | up   | 1.18 | up   | 1.60 | up   | 6.72 | up   | JA  |
| Os.12693.3.S1_at   | LOC_Os07g49400 | OsAPx2 - Cytosolic Ascorbate Peroxidase encoding gene 4,5,6,8, expressed              | 2.09 | down | 1.82 | down | 1.52   | up   | 1.24 | up   | 1.35 | up   | 1.33 | up   | IAA |
| Os.12701.1.S1_at   | LOC_Os04g55650 | oryzain alpha chain precursor, putative, expressed                                    | 1.09 | up   | 1.54 | down | 2.13   | up   | 1.01 | down | 1.14 | up   | 1.45 | up   | ABA |
| Os.12703.1.S1_at   | LOC_Os03g10090 | transporter family protein, putative, expressed                                       | 1.38 | up   | 1.24 | down | 2.70   | up   | 1.74 | down | 1.08 | down | 1.22 | up   | ABA |
| Os.12710.1.S1_at   | LOC_Os07g42370 | zinc-finger protein, putative, expressed                                              | 1.13 | up   | 1.11 | up   | 2.09   | down | 1.12 | up   | 1.43 | down | 2.29 | up   | 2   |
| Os.12714.1.S1_at   | AK058850       | Oryza sativa Japonica Group cDNA clone:001-004-H10, full insert sequence.             | 1.35 | up   | 1.22 | down | 3.33   | up   | 1.51 | up   | 2.50 | up   | 1.45 | up   | 2   |
| Os.12715.1.S1_at   | LOC_Os01g12650 | reticulon domain containing protein, putative, expressed                              | 1.05 | down | 1.03 | up   | 2.51   | down | 1.07 | down | 1.72 | down | 1.19 | down | ABA |
| Os.12724.1.S1_a_at | LOC_Os08g36320 | decarboxylase, putative, expressed                                                    | 1.22 | up   | 1.31 | down | 12.11  | up   | 1.64 | down | 1.23 | up   | 1.68 | down | ABA |
| Os.12725.1.S1_at   | LOC_Os06g06560 | starch synthase, putative, expressed                                                  | 1.39 | up   | 1.21 | up   | 11.13  | up   | 1.04 | up   | 1.04 | down | 1.19 | down | ABA |
| Os.12732.1.S1_a_at | LOC_Os10g42320 | nonsense-mediated mRNA decay protein 3, putative, expressed                           | 1.50 | up   | 1.26 | up   | 1.13   | down | 1.24 | up   | 2.50 | up   | 1.18 | up   | SA  |
| Os.12737.1.S1_at   | LOC_Os06g43800 | methyltransferase domain containing protein, putative, expressed                      | 1.32 | up   | 1.15 | up   | 2.35   | down | 1.05 | up   | 1.19 | down | 1.09 | down | ABA |
| Os.12738.1.S2_a_at | LOC_Os01g48960 | glutamate synthase, chloroplast precursor, putative, expressed                        | 1.13 | up   | 1.44 | down | 2.64   | up   | 1.03 | down | 5.71 | up   | 1.74 | up   | 2   |
| Os.12751.1.S1_at   | LOC_Os02g48470 | expressed protein                                                                     | 1.02 | up   | 1.19 | down | 2.50   | down | 1.31 | down | 1.59 | down | 1.09 | up   | ABA |
| Os.12758.1.S1_at   | LOC_Os08g42040 | LTP180 - Protease inhibitor/seed storage/LTP family protein precursor, expressed      | 1.28 | up   | 1.01 | down | 2.22   | down | 1.01 | down | 1.08 | down | 1.08 | up   | ABA |
| Os.12761.1.S1_at   | LOC_Os03g46060 | thaumatin family domain containing protein, expressed                                 | 1.20 | down | 4.22 | up   | 4.07   | up   | 1.31 | down | 1.12 | up   | 1.29 | down | 2   |
| Os.12766.1.S1_at   | LOC_Os03g14570 | expressed protein                                                                     | 1.19 | up   | 1.36 | down | 3.52   | up   | 1.34 | down | 1.13 | up   | 1.24 | down | ABA |
| Os.12769.1.S1_at   | AK119705       | Oryza sativa Japonica Group cDNA clone:J023119K19, full insert sequence.              | 1.07 | down | 1.00 | up   | 2.62   | down | 1.08 | down | 1.30 | down | 1.23 | up   | ABA |
| Os.12780.1.S1_at   | LOC_Os08g02120 | kinase, pfkB family, putative, expressed                                              | 1.08 | up   | 1.02 | down | 3.35   | down | 1.11 | down | 1.50 | down | 1.09 | up   | ABA |



|                    |                |                                                                                       |      |      |      |      |        |      |      |      |       |      |      |      |     |
|--------------------|----------------|---------------------------------------------------------------------------------------|------|------|------|------|--------|------|------|------|-------|------|------|------|-----|
| Os.12812.1.S1_at   | LOC_Os05g28210 | small hydrophilic plant seed protein, putative, expressed                             | 2.17 | up   | 1.48 | up   | 5.54   | up   | 1.39 | down | 1.28  | up   | 1.01 | up   | 2   |
| Os.12829.1.S1_at   | LOC_Os02g44320 | LTP113 - Protease inhibitor/seed storage/LTP family protein precursor, expressed      | 1.11 | up   | 1.05 | down | 3.54   | down | 1.02 | up   | 1.41  | down | 1.25 | down | ABA |
| Os.12830.1.S1_at   | LOC_Os04g55920 | zinc-finger protein, putative, expressed                                              | 1.22 | down | 1.13 | down | 1.12   | down | 1.08 | up   | 1.10  | down | 2.34 | up   | JA  |
| Os.12843.1.S1_at   | LOC_Os03g22020 | peroxidase precursor, putative, expressed                                             | 5.68 | up   | 4.01 | up   | 6.06   | up   | 1.78 | up   | 9.62  | up   | 3.29 | up   | 5   |
| Os.12851.1.S1_at   | LOC_Os01g14670 | Cupin domain containing protein, expressed                                            | 1.44 | down | 1.16 | up   | 2.70   | down | 1.03 | down | 1.44  | down | 1.06 | down | ABA |
| Os.12866.1.S1_at   | LOC_Os02g48360 | pyrophosphate-fructose 6-phosphate 1-phosphotransferase subunit alpha, putative, ex   | 1.16 | down | 1.13 | down | 3.53   | down | 1.03 | down | 1.86  | down | 1.32 | down | ABA |
| Os.12918.2.S1_x_at | LOC_Os04g58320 | zinc finger, RING-type, putative, expressed                                           | 1.09 | down | 1.39 | down | 2.03   | up   | 1.05 | down | 1.15  | up   | 1.12 | down | ABA |
| Os.12934.1.S1_at   | LOC_Os01g24030 | AMP-binding enzyme, putative, expressed                                               | 3.63 | up   | 1.53 | up   | 1.51   | up   | 1.20 | up   | 13.20 | up   | 1.69 | up   | 2   |
| Os.12950.1.S1_at   | LOC_Os03g29180 | ubiquinone biosynthesis protein COQ9, mitochondrial precursor, putative, expressed    | 1.24 | up   | 1.01 | down | 2.98   | up   | 1.15 | up   | 1.65  | up   | 1.21 | up   | ABA |
| Os.12952.1.S1_at   | LOC_Os01g71860 | glycosyl hydrolases family 17, putative, expressed                                    | 1.60 | down | 1.05 | down | 1.26   | up   | 1.84 | up   | 1.30  | up   | 5.70 | up   | JA  |
| Os.12965.1.S1_at   | LOC_Os09g25290 | methyladenine glycosylase, putative, expressed                                        | 1.84 | down | 1.26 | down | 3.13   | down | 1.30 | down | 1.53  | down | 1.33 | down | ABA |
| Os.12974.1.S1_at   | LOC_Os11g29380 | MCM2 - Putative minichromosome maintenance MCM complex subunit 2, expressed           | 1.11 | down | 1.05 | down | 4.89   | down | 1.11 | down | 2.01  | down | 1.82 | down | 2   |
| Os.12979.3.S1_x_at | LOC_Os01g61720 | IQ calmodulin-binding motif domain containing protein, expressed                      | 1.01 | down | 1.17 | down | 2.37   | down | 1.04 | down | 1.07  | down | 1.21 | down | ABA |
| Os.12990.1.S1_x_at | LOC_Os03g50970 | retrotransposon protein, putative, Ty1-copia subclass, expressed                      | 1.70 | down | 1.73 | down | 1.79   | down | 1.35 | up   | 1.09  | up   | 2.91 | up   | JA  |
| Os.12993.1.S1_at   | LOC_Os05g07090 | acyl-coenzyme A dehydrogenase, mitochondrial precursor, putative, expressed           | 1.11 | up   | 1.02 | down | 4.48   | up   | 1.28 | up   | 2.11  | up   | 2.58 | up   | 3   |
| Os.12995.1.S1_at   | LOC_Os04g59420 | expressed protein                                                                     | 1.64 | up   | 1.22 | down | 5.70   | up   | 1.66 | up   | 1.63  | up   | 1.30 | down | ABA |
| Os.12999.1.S1_at   | NM_001060566   | Oryza sativa (japonica cultivar-group) Os04g0639100 (Os04g0639100) mRNA, comple       | 1.22 | down | 1.12 | up   | 1.72   | down | 2.95 | down | 1.22  | down | 1.83 | up   | ACC |
| Os.13014.1.S1_a_at | LOC_Os10g38140 | glutathione S-transferase, putative, expressed                                        | 1.07 | up   | 1.00 | down | 2.37   | down | 1.07 | down | 1.08  | up   | 1.02 | down | ABA |
| Os.13016.1.S1_a_at | LOC_Os07g07320 | glutathione S-transferase, putative, expressed                                        | 1.04 | up   | 1.21 | up   | 3.55   | down | 1.37 | down | 1.18  | up   | 1.69 | up   | ABA |
| Os.1307.1.S1_a_at  | LOC_Os11g05190 | phytosulfokines precursor, putative, expressed                                        | 1.40 | down | 5.96 | up   | 2.79   | down | 1.47 | up   | 1.02  | up   | 4.83 | up   | 3   |
| Os.13102.1.S1_at   | LOC_Os01g55650 | phospholipase, patatin family, putative, expressed                                    | 1.03 | up   | 1.15 | down | 2.47   | up   | 1.40 | up   | 1.83  | up   | 1.47 | up   | ABA |
| Os.1311.1.S1_at    | LOC_Os02g02410 | DnaK family protein, putative, expressed                                              | 1.54 | down | 1.08 | up   | 3.05   | down | 1.13 | up   | 1.40  | down | 1.13 | up   | ABA |
| Os.1316.1.S2_at    | LOC_Os02g04780 | expressed protein                                                                     | 1.00 | down | 1.07 | down | 328.27 | up   | 1.13 | down | 2.35  | up   | 1.01 | down | 2   |
| Os.13246.1.S1_at   | LOC_Os01g59870 | LTP165 - Protease inhibitor/seed storage/LTP family protein precursor, expressed      | 1.23 | up   | 1.06 | up   | 5.32   | down | 1.03 | up   | 1.05  | down | 1.03 | up   | ABA |
| Os.1344.1.S1_at    | LOC_Os02g43700 | triacylglycerol lipase like protein, putative, expressed                              | 1.39 | up   | 1.17 | up   | 1.35   | down | 1.10 | down | 1.07  | down | 4.02 | up   | JA  |
| Os.13466.1.S1_at   | LOC_Os02g43300 | expressed protein                                                                     | 1.18 | down | 1.11 | down | 2.89   | up   | 1.05 | up   | 1.08  | up   | 1.01 | up   | ABA |
| Os.13497.1.S2_at   | LOC_Os03g13820 | protein kinase family protein, putative, expressed                                    | 1.22 | up   | 1.19 | down | 2.11   | up   | 1.08 | down | 1.05  | down | 1.10 | down | ABA |
| Os.13500.1.S1_at   | LOC_Os01g20940 | PHS1, putative, expressed                                                             | 1.03 | down | 1.04 | up   | 2.10   | up   | 1.14 | down | 1.11  | down | 1.22 | down | ABA |
| Os.13500.2.S1_x_at | LOC_Os01g20940 | PHS1, putative, expressed                                                             | 1.56 | up   | 1.00 | up   | 2.98   | up   | 1.11 | down | 1.06  | down | 1.11 | up   | ABA |
| Os.13516.1.S1_at   | LOC_Os12g05540 | Ser/Thr protein phosphatase family protein, putative, expressed                       | 1.16 | down | 1.00 | up   | 49.30  | up   | 1.02 | up   | 4.47  | up   | 1.07 | up   | 2   |
| Os.13543.1.S1_at   | LOC_Os12g23280 | heavy metal-associated domain containing protein, expressed                           | 1.44 | down | 1.11 | down | 2.37   | down | 1.04 | down | 1.03  | down | 1.43 | up   | ABA |
| Os.13544.1.S1_x_at | LOC_Os01g37832 | thioredoxin, putative, expressed                                                      | 1.01 | up   | 1.06 | up   | 2.48   | up   | 1.18 | down | 1.09  | up   | 1.21 | down | ABA |
| Os.13595.1.S1_at   | LOC_Os01g70310 | inducer of CBF expression 2, putative, expressed                                      | 1.01 | up   | 1.38 | down | 5.96   | up   | 1.06 | up   | 1.05  | down | 1.05 | up   | ABA |
| Os.13595.2.S1_x_at | LOC_Os01g70310 | inducer of CBF expression 2, putative, expressed                                      | 1.59 | up   | 1.42 | down | 7.31   | up   | 1.01 | down | 1.03  | down | 1.04 | up   | ABA |
| Os.13596.1.S1_at   | LOC_Os03g10320 | expressed protein                                                                     | 1.07 | down | 1.57 | up   | 3.96   | up   | 1.14 | down | 1.31  | up   | 1.00 | up   | ABA |
| Os.13604.1.S1_at   | LOC_Os02g30100 | cytochrome P450, putative, expressed                                                  | 1.35 | up   | 1.20 | down | 4.33   | up   | 1.17 | up   | 2.61  | up   | 5.06 | up   | 3   |
| Os.13615.1.S1_at   | LOC_Os01g47262 | AMSH-like protease, putative, expressed                                               | 1.06 | up   | 1.24 | down | 2.57   | up   | 1.12 | down | 1.06  | up   | 1.48 | down | ABA |
| Os.13615.4.S1_x_at | LOC_Os01g47262 | AMSH-like protease, putative, expressed                                               | 1.25 | up   | 1.15 | down | 3.18   | up   | 1.04 | down | 1.05  | up   | 1.31 | down | ABA |
| Os.13624.1.S1_at   | LOC_Os01g38510 | Oryza sativa Japonica Group cDNA clone:J013042A04, full insert sequence.              | 1.24 | down | 1.13 | up   | 3.37   | down | 1.05 | up   | 1.25  | down | 1.18 | up   | ABA |
| Os.13690.1.S1_at   | LOC_Os02g42000 | expressed protein                                                                     | 1.94 | up   | 1.01 | down | 5.11   | up   | 1.04 | up   | 1.63  | up   | 1.02 | down | ABA |
| Os.13704.1.S1_x_at | AK288399       | Oryza sativa Japonica Group cDNA, clone: J090029F22, full insert sequence.            | 1.01 | up   | 1.02 | up   | 2.57   | up   | 1.41 | up   | 64.53 | up   | 1.13 | up   | 2   |
| Os.13708.2.A1_at   | LOC_Os03g22790 | beta-amylase, putative, expressed                                                     | 1.36 | down | 1.01 | down | 10.87  | up   | 1.23 | up   | 1.60  | up   | 1.25 | up   | ABA |
| Os.13735.1.S1_at   | LOC_Os02g58150 | expressed protein                                                                     | 1.37 | down | 1.32 | down | 2.61   | up   | 1.08 | up   | 1.30  | up   | 1.28 | up   | ABA |
| Os.1376.1.S1_at    | LOC_Os03g11540 | RPA1B - Putative single-stranded DNA binding complex subunit 1, expressed             | 1.40 | down | 1.09 | down | 11.42  | down | 1.24 | down | 2.54  | down | 1.96 | down | 2   |
| Os.13781.1.S2_at   | LOC_Os02g54254 | saccharopine dehydrogenase, putative, expressed                                       | 1.38 | down | 1.19 | down | 4.68   | up   | 1.26 | up   | 1.46  | up   | 1.58 | up   | ABA |
| Os.13800.1.S1_at   | LOC_Os05g04870 | oxidoreductase, short chain dehydrogenase/reductase family protein, putative, express | 1.00 | down | 1.00 | up   | 291.57 | up   | 1.01 | up   | 1.04  | up   | 1.02 | up   | ABA |
| Os.13812.1.S1_a_at | LOC_Os03g61600 | phosphoribosylformylglycinamide synthase, putative, expressed                         | 1.06 | down | 1.02 | up   | 2.14   | down | 1.16 | up   | 1.30  | down | 1.05 | down | ABA |
| Os.13917.1.S1_at   | LOC_Os05g49170 | cold acclimation protein WCOR413, putative, expressed                                 | 1.12 | up   | 1.14 | down | 3.26   | up   | 1.31 | down | 1.13  | down | 1.04 | up   | ABA |
| Os.13954.1.S1_x_at | LOC_Os08g31950 | hypothetical protein                                                                  | 1.33 | up   | 1.09 | up   | 17.73  | up   | 1.37 | up   | 1.46  | up   | 1.37 | up   | ABA |
| Os.13968.1.S1_a_at | AF503583       | Oryza sativa (indica cultivar-group) early drought induced protein (R1G1B) mRNA, cor  | 1.05 | up   | 1.03 | up   | 2.75   | up   | 1.01 | up   | 1.38  | up   | 1.01 | down | ABA |
| Os.13968.2.S1_a_at | LOC_Os05g04700 | Hydrophobic protein LT16b, putative                                                   | 1.13 | down | 1.03 | up   | 6.70   | up   | 1.02 | down | 1.33  | up   | 1.07 | up   | ABA |
| Os.13972.1.S1_at   | LOC_Os07g44430 | peroxiredoxin, putative                                                               | 1.20 | up   | 1.16 | up   | 381.99 | up   | 1.47 | up   | 6.91  | up   | 1.95 | up   | 2   |
| Os.13996.1.S1_at   | LOC_Os07g40860 | retrotransposon protein, putative, unclassified, expressed                            | 1.22 | up   | 1.26 | up   | 2.60   | up   | 1.43 | down | 1.05  | down | 1.23 | down | ABA |
| Os.13999.1.S1_at   | LOC_Os02g08150 | CCT/B-box zinc finger protein, putative, expressed                                    | 1.07 | up   | 1.18 | up   | 3.08   | down | 1.01 | up   | 1.73  | down | 1.07 | up   | ABA |
| Os.14042.1.S1_at   | CT833862       | Oryza sativa (indica cultivar-group) cDNA clone:OSIGCEA031G18, full insert sequence   | 1.12 | up   | 1.02 | down | 3.53   | up   | 1.11 | down | 1.59  | down | 1.24 | down | ABA |

|                    |                |                                                                                            |      |      |      |      |       |      |      |      |      |      |       |      |     |
|--------------------|----------------|--------------------------------------------------------------------------------------------|------|------|------|------|-------|------|------|------|------|------|-------|------|-----|
| Os.14052.1.S1_at   | LOC_Os03g45210 | 2-aminoethanethiol dioxygenase, putative, expressed                                        | 1.47 | down | 1.26 | down | 41.03 | up   | 1.01 | up   | 1.01 | down | 1.02  | up   | ABA |
| Os.14071.1.S1_at   | LOC_Os09g29940 | auxin-independent growth promoter protein, putative, expressed                             | 1.04 | down | 1.57 | up   | 6.13  | up   | 1.13 | up   | 1.40 | up   | 1.59  | up   | ABA |
| Os.14080.1.S1_s_at | LOC_Os03g47120 | CBS domain containing protein, expressed                                                   | 1.01 | up   | 1.04 | down | 5.91  | up   | 1.07 | up   | 1.06 | up   | 1.33  | up   | ABA |
| Os.14084.1.S1_at   | LOC_Os03g61920 | electron transfer flavoprotein subunit alpha, mitochondrial precursor, putative, expressed | 1.08 | up   | 1.10 | up   | 3.25  | up   | 1.12 | up   | 1.74 | up   | 1.25  | up   | ABA |
| Os.14088.1.S1_at   | LOC_Os08g04830 | expressed protein                                                                          | 1.09 | up   | 1.19 | down | 3.97  | up   | 1.03 | down | 1.23 | up   | 1.00  | up   | ABA |
| Os.14092.1.S1_at   | LOC_Os02g44710 | expressed protein                                                                          | 1.02 | down | 1.15 | down | 2.10  | down | 1.11 | down | 1.15 | down | 1.79  | down | ABA |
| Os.14101.3.S1_at   | LOC_Os01g61200 | GDSSL-like lipase                                                                          | 3.25 | up   | 1.78 | up   | 2.07  | up   | 1.52 | up   | 1.01 | up   | 1.38  | down | 2   |
| Os.14105.1.S1_at   | LOC_Os11g05380 | cytochrome P450, putative, expressed                                                       | 2.14 | up   | 1.30 | up   | 1.53  | down | 1.11 | up   | 4.76 | up   | 11.32 | up   | 3   |
| Os.1411.1.S1_at    | LOC_Os01g10890 | CAMK_KIN1/SNF1/Nim1_like.8 - CAMK includes calcium/calmodulin dependent protein            | 1.29 | up   | 1.23 | down | 9.07  | up   | 2.04 | down | 1.39 | up   | 1.32  | down | 2   |
| Os.14119.2.S1_x_at | LOC_Os10g41040 | ternary complex factor MIP1, putative, expressed                                           | 1.07 | up   | 1.08 | up   | 2.02  | down | 1.04 | down | 1.39 | up   | 1.05  | up   | ABA |
| Os.14121.1.S1_at   | LOC_Os11g06900 | amidase family protein, putative, expressed                                                | 1.08 | up   | 1.04 | up   | 10.50 | down | 1.08 | down | 2.22 | down | 1.09  | down | 2   |
| Os.14122.1.S1_at   | LOC_Os01g13210 | salt stress root protein RS1, putative, expressed                                          | 1.42 | up   | 1.28 | down | 2.57  | up   | 1.09 | down | 1.09 | up   | 1.15  | down | ABA |
| Os.14139.1.S1_at   | LOC_Os04g31340 | CBS domain containing membrane protein, putative, expressed                                | 1.04 | up   | 1.13 | up   | 2.18  | up   | 1.02 | up   | 1.28 | up   | 1.04  | down | ABA |
| Os.14152.1.S1_at   | LOC_Os09g19790 | puromycin-sensitive aminopeptidase, putative, expressed                                    | 1.01 | up   | 1.09 | down | 1.07  | up   | 1.02 | down | 1.02 | up   | 2.89  | up   | JA  |
| Os.14184.1.S1_at   | LOC_Os06g11410 | cyclin, putative, expressed                                                                | 1.30 | down | 1.23 | up   | 3.36  | down | 1.01 | down | 1.36 | down | 1.76  | down | ABA |
| Os.14191.1.S1_at   | LOC_Os08g04310 | plastocyanin-like domain containing protein, putative, expressed                           | 1.04 | up   | 1.06 | up   | 2.40  | down | 1.02 | down | 1.06 | down | 1.11  | down | ABA |
| Os.14200.1.S1_at   | LOC_Os10g24070 | expressed protein                                                                          | 1.06 | up   | 1.05 | down | 2.50  | up   | 1.04 | down | 1.17 | up   | 1.07  | down | ABA |
| Os.14200.2.S1_x_at | LOC_Os10g24070 | expressed protein                                                                          | 1.10 | up   | 1.14 | down | 2.66  | up   | 1.03 | up   | 1.23 | up   | 1.29  | up   | ABA |
| Os.14205.1.S1_at   | LOC_Os05g41620 | expressed protein                                                                          | 1.17 | up   | 1.03 | up   | 8.00  | up   | 1.15 | down | 1.61 | up   | 1.18  | down | ABA |
| Os.14208.1.S1_at   | LOC_Os06g28000 | carboxyl-terminal peptidase, putative, expressed                                           | 1.52 | down | 1.74 | down | 2.06  | down | 1.08 | down | 1.07 | down | 1.19  | down | ABA |
| Os.14210.1.S1_at   | LOC_Os10g36360 | expressed protein                                                                          | 4.72 | up   | 1.17 | up   | 5.64  | up   | 1.13 | up   | 1.00 | up   | 2.01  | down | 3   |
| Os.14232.1.S1_at   | LOC_Os01g46120 | GDSSL-like lipase/acylhydrolase, putative, expressed                                       | 1.06 | up   | 1.32 | up   | 1.17  | down | 2.07 | down | 1.13 | up   | 1.19  | up   | ACC |
| Os.14251.1.S1_a_at | LOC_Os03g14380 | autophagy protein 9, putative, expressed                                                   | 1.00 | up   | 1.25 | down | 3.36  | up   | 1.20 | up   | 1.41 | up   | 1.36  | up   | ABA |
| Os.14251.1.S1_at   | LOC_Os03g14380 | autophagy protein 9, putative, expressed                                                   | 1.30 | up   | 1.07 | down | 2.91  | up   | 1.01 | up   | 1.33 | up   | 1.20  | up   | ABA |
| Os.14251.1.S2_at   | LOC_Os03g14380 | autophagy protein 9, putative, expressed                                                   | 1.20 | up   | 1.11 | down | 3.11  | up   | 1.13 | up   | 1.42 | up   | 1.25  | up   | ABA |
| Os.14251.2.S1_x_at | LOC_Os03g14380 | autophagy protein 9, putative, expressed                                                   | 1.10 | up   | 1.27 | down | 3.48  | up   | 1.13 | up   | 1.38 | up   | 1.38  | up   | ABA |
| Os.14289.1.S1_at   | LOC_Os04g45750 | expressed protein                                                                          | 1.02 | down | 1.43 | down | 2.73  | up   | 1.07 | up   | 1.38 | up   | 1.25  | up   | ABA |
| Os.14332.1.S1_at   | LOC_Os02g28340 | transferase family protein, putative, expressed                                            | 1.83 | up   | 1.08 | up   | 3.09  | up   | 1.18 | up   | 8.89 | up   | 2.00  | up   | 3   |
| Os.14358.1.S1_at   | LOC_Os02g12730 | beta-galactosidase precursor, putative, expressed                                          | 1.71 | down | 1.06 | down | 3.84  | down | 1.45 | down | 1.48 | down | 1.50  | down | ABA |
| Os.14358.4.S1_x_at | LOC_Os02g12730 | beta-galactosidase precursor, putative, expressed                                          | 1.21 | down | 1.16 | down | 4.92  | down | 1.67 | down | 1.69 | down | 1.39  | down | ABA |
| Os.14366.1.S1_s_at | LOC_Os08g37840 | phosphate-induced protein 1 conserved region domain containing protein, expressed          | 1.01 | up   | 1.31 | down | 2.48  | up   | 1.13 | down | 2.32 | up   | 2.61  | up   | 3   |
| Os.14381.1.S1_at   | LOC_Os03g28300 | protein kinase domain containing protein, expressed                                        | 1.03 | up   | 1.28 | down | 2.39  | up   | 1.69 | down | 1.20 | up   | 1.31  | down | ABA |
| Os.14390.1.S1_at   | LOC_Os06g11380 | geminivirus Rep-interacting motor protein, putative, expressed                             | 1.23 | up   | 1.19 | up   | 2.21  | down | 1.29 | down | 1.30 | down | 1.32  | down | ABA |
| Os.14395.1.S1_at   | LOC_Os01g07700 | expressed protein                                                                          | 1.05 | up   | 1.07 | down | 4.04  | up   | 1.04 | down | 1.08 | up   | 1.12  | up   | ABA |
| Os.14407.1.S1_at   | LOC_Os08g01890 | DNA binding protein, putative, expressed                                                   | 1.08 | up   | 1.05 | down | 3.06  | up   | 1.11 | down | 1.19 | down | 1.30  | down | ABA |
| Os.14427.1.S1_at   | LOC_Os01g57420 | diacylglycerol kinase, putative, expressed                                                 | 1.08 | up   | 1.02 | down | 8.82  | up   | 1.23 | down | 1.06 | up   | 1.13  | up   | ABA |
| Os.1443.1.S1_a_at  | LOC_Os01g06640 | basic helix-loop-helix, putative, expressed                                                | 1.09 | down | 1.24 | down | 8.45  | up   | 1.01 | down | 2.15 | up   | 1.29  | up   | 2   |
| Os.14430.1.S1_at   | LOC_Os02g20540 | fasciclin domain containing protein, expressed                                             | 1.14 | down | 1.30 | down | 5.00  | down | 1.24 | down | 1.69 | down | 1.17  | down | ABA |
| Os.1445.1.S1_at    | LOC_Os01g06660 | thiamine pyrophosphate enzyme, C-terminal TPP binding domain containing protein, expressed | 1.16 | up   | 1.00 | up   | 5.76  | up   | 1.19 | up   | 3.18 | up   | 1.58  | up   | 2   |
| Os.14476.1.S1_a_at | LOC_Os02g07230 | porphobilinogen deaminase, chloroplast precursor, putative, expressed                      | 1.18 | up   | 1.02 | down | 2.70  | down | 1.06 | down | 1.51 | down | 1.05  | down | ABA |
| Os.14546.1.S1_at   | LOC_Os02g26650 | delta14-sterol reductase, putative, expressed                                              | 1.02 | down | 1.13 | down | 2.13  | down | 1.08 | down | 1.26 | down | 1.20  | down | ABA |
| Os.14563.1.S1_at   | LOC_Os07g49460 | response regulator receiver domain containing protein, expressed                           | 1.23 | up   | 1.10 | up   | 2.28  | up   | 1.11 | up   | 9.36 | up   | 4.28  | up   | 3   |
| Os.14565.1.S1_at   | LOC_Os07g12250 | ribosomal protein L24, putative, expressed                                                 | 1.02 | down | 1.06 | up   | 2.25  | down | 1.01 | down | 1.39 | down | 1.21  | down | ABA |
| Os.14574.1.S1_at   | LOC_Os04g51970 | synaptic vesicle 2-related protein, putative, expressed                                    | 1.36 | up   | 1.07 | down | 2.44  | up   | 1.04 | down | 1.66 | up   | 1.25  | up   | ABA |
| Os.14592.1.S1_at   | LOC_Os06g39260 | solute carrier family 35 member B1, putative, expressed                                    | 1.60 | down | 1.20 | up   | 3.69  | down | 1.14 | up   | 1.68 | down | 1.32  | up   | ABA |
| Os.14616.1.S1_at   | LOC_Os07g34260 | chalcone and stilbene synthases, putative, expressed                                       | 1.02 | down | 1.27 | down | 4.75  | down | 1.02 | down | 1.08 | up   | 2.21  | up   | 2   |
| Os.14645.1.S1_s_at | LOC_Os05g11840 | expressed protein                                                                          | 1.18 | down | 1.06 | down | 2.78  | up   | 1.17 | down | 1.24 | up   | 1.05  | down | ABA |
| Os.14645.3.S1_at   | LOC_Os05g11840 | expressed protein                                                                          | 1.04 | up   | 1.17 | down | 7.57  | up   | 1.01 | up   | 1.25 | up   | 1.25  | up   | ABA |
| Os.14762.3.S1_at   | LOC_Os11g47930 | alpha-hemolysin, putative                                                                  | 1.75 | down | 1.14 | down | 3.57  | up   | 1.61 | up   | 1.76 | up   | 1.26  | up   | ABA |
| Os.14775.1.S1_at   | LOC_Os01g67420 | lipase, putative, expressed                                                                | 1.25 | up   | 1.04 | down | 2.07  | up   | 1.04 | up   | 1.69 | up   | 1.21  | up   | ABA |
| Os.14791.1.S1_at   | LOC_Os11g32500 | rubredoxin family protein, putative, expressed                                             | 1.28 | up   | 1.06 | down | 3.75  | down | 1.17 | down | 1.90 | down | 1.36  | down | ABA |
| Os.14809.1.S1_at   | LOC_Os03g56430 | expressed protein                                                                          | 1.12 | down | 1.11 | down | 2.36  | down | 1.43 | down | 1.66 | down | 1.55  | up   | ABA |
| Os.14823.1.S1_s_at | LOC_Os03g20090 | MYB family transcription factor, putative, expressed                                       | 1.09 | up   | 1.19 | down | 1.33  | up   | 1.03 | up   | 1.06 | down | 2.25  | up   | JA  |
| Os.14844.1.A1_at   | NM_001055743   | Oryza sativa (japonica cultivar-group) Os03g0187300 (Os03g0187300) mRNA, partial           | 1.03 | down | 1.06 | up   | 2.53  | up   | 1.05 | down | 1.16 | up   | 1.21  | down | ABA |
| Os.14848.1.S1_at   | LOC_Os06g48040 | zinc finger, C3HC4 type domain containing protein, expressed                               | 1.01 | down | 1.10 | down | 3.35  | up   | 1.15 | up   | 1.00 | down | 1.06  | down | ABA |

|                    |                |                                                                                            |      |      |      |      |       |      |       |      |      |      |      |      |     |
|--------------------|----------------|--------------------------------------------------------------------------------------------|------|------|------|------|-------|------|-------|------|------|------|------|------|-----|
| Os.14852.1.A1_at   | LOC_Os06g40060 | glycosyltransferase family protein, putative, expressed                                    | 1.02 | up   | 1.01 | down | 2.98  | up   | 1.00  | up   | 1.14 | up   | 1.18 | up   | ABA |
| Os.14854.1.S1_at   | LOC_Os05g36360 | U-box domain containing protein, expressed                                                 | 1.13 | down | 1.07 | down | 3.84  | down | 1.31  | up   | 1.32 | down | 1.26 | down | ABA |
| Os.14862.1.S1_s_at | LOC_Os08g10320 | SHR5-receptor-like kinase, putative, expressed                                             | 1.21 | down | 1.73 | up   | 5.95  | down | 1.95  | up   | 2.42 | down | 1.42 | down | 2   |
| Os.14869.1.S1_at   | LOC_Os01g49110 | prenyltransferase, putative, expressed                                                     | 1.20 | down | 1.01 | down | 3.32  | down | 1.16  | down | 1.29 | down | 1.25 | up   | ABA |
| Os.14885.1.S1_at   | LOC_Os05g43460 | DUF567 domain containing protein, putative, expressed                                      | 1.01 | down | 1.55 | down | 2.41  | up   | 1.35  | down | 1.01 | down | 1.11 | down | ABA |
| Os.14901.1.A1_a_at | LOC_Os09g33820 | lecithine cholesterol acyltransferase, putative, expressed                                 | 1.05 | up   | 1.04 | up   | 6.24  | up   | 1.34  | up   | 1.68 | up   | 1.50 | up   | ABA |
| Os.14911.1.S1_at   | LOC_Os08g16480 | ATPase, AFG1 family domain containing protein, expressed                                   | 1.04 | up   | 1.07 | down | 2.35  | up   | 1.31  | up   | 1.49 | up   | 1.17 | up   | ABA |
| Os.14917.1.S1_x_at | LOC_Os01g10280 | phosphoribosylaminoimidazole carboxylase, chloroplast precursor, putative, expressed       | 1.02 | up   | 1.11 | up   | 2.01  | down | 1.18  | up   | 1.37 | down | 1.08 | down | ABA |
| Os.14934.1.S1_at   | LOC_Os04g08740 | ethylene receptor, putative, expressed                                                     | 1.14 | up   | 1.45 | up   | 1.43  | down | 2.67  | up   | 1.08 | down | 1.31 | down | ACC |
| Os.14934.2.S1_at   | LOC_Os04g08740 | ethylene receptor, putative, expressed                                                     | 1.12 | down | 1.88 | up   | 1.03  | down | 10.48 | up   | 1.25 | up   | 1.08 | up   | ACC |
| Os.14946.1.S1_at   | LOC_Os03g04920 | multidrug resistance-associated protein, putative, expressed                               | 1.10 | down | 1.06 | down | 3.36  | up   | 1.06  | down | 1.81 | up   | 1.13 | up   | ABA |
| Os.14951.1.S1_at   | LOC_Os08g39730 | cytochrome P450, putative, expressed                                                       | 1.40 | down | 1.51 | up   | 8.98  | up   | 1.53  | down | 4.25 | up   | 2.63 | up   | 3   |
| Os.14963.1.S1_at   | LOC_Os04g52140 | protein kinase domain containing protein, expressed                                        | 1.24 | up   | 1.31 | down | 2.23  | up   | 1.15  | down | 3.00 | up   | 1.61 | down | 2   |
| Os.14978.1.S1_a_at | LOC_Os07g35510 | glucan endo-1,3-beta-glucosidase precursor, putative, expressed                            | 1.06 | down | 1.15 | up   | 2.64  | up   | 1.22  | down | 1.75 | up   | 1.38 | up   | ABA |
| Os.1503.1.S1_at    | LOC_Os06g45140 | bZIP transcription factor domain containing protein, expressed                             | 1.04 | up   | 1.05 | down | 3.24  | down | 1.13  | down | 1.47 | up   | 1.87 | up   | ABA |
| Os.15045.1.S1_at   | LOC_Os04g56790 | TLD family protein, putative, expressed                                                    | 1.54 | up   | 1.04 | up   | 6.26  | up   | 1.04  | down | 1.31 | up   | 1.01 | down | ABA |
| Os.15046.1.S1_at   | LOC_Os02g33230 | nucleoside-diphosphate-sugar epimerase, putative, expressed                                | 1.15 | down | 1.03 | down | 2.21  | up   | 1.09  | up   | 1.36 | up   | 1.11 | up   | ABA |
| Os.15077.1.S1_a_at | LOC_Os01g32080 | thiamine pyrophosphate enzyme, C-terminal TPP binding domain containing protein, expressed | 1.25 | up   | 1.03 | up   | 1.33  | up   | 1.06  | up   | 2.11 | up   | 1.22 | up   | SA  |
| Os.15087.1.S1_at   | LOC_Os03g12150 | serine/threonine-protein kinase receptor precursor, putative, expressed                    | 1.14 | up   | 1.26 | down | 5.69  | down | 1.27  | down | 1.33 | down | 1.61 | down | ABA |
| Os.15092.1.S1_at   | LOC_Os09g31130 | citrate transporter, putative, expressed                                                   | 2.87 | up   | 1.22 | up   | 26.19 | up   | 1.31  | down | 3.93 | up   | 1.39 | up   | 3   |
| Os.15125.1.S1_x_at | LOC_Os04g07110 | expressed protein                                                                          | 1.00 | down | 1.18 | down | 2.24  | down | 1.29  | up   | 1.43 | down | 4.25 | up   | 2   |
| Os.152.1.S1_at     | LOC_Os11g01340 | omega-3 fatty acid desaturase, chloroplast precursor, putative, expressed                  | 1.10 | down | 1.16 | down | 4.62  | down | 1.10  | down | 1.48 | down | 1.03 | up   | ABA |
| Os.15206.1.S1_at   | LOC_Os01g21630 | pectinacetylesterase domain containing protein, expressed                                  | 1.29 | down | 1.47 | down | 5.43  | up   | 1.17  | up   | 1.08 | up   | 1.02 | down | ABA |
| Os.15216.1.S1_at   | LOC_Os05g36190 | OsFBT7 - F-box and tubby domain containing protein, expressed                              | 1.06 | up   | 1.39 | down | 2.29  | up   | 1.00  | down | 1.11 | up   | 1.30 | up   | ABA |
| Os.15219.1.S1_at   | LOC_Os06g11320 | peptidyl-prolyl cis-trans isomerase CYP40, putative, expressed                             | 1.14 | down | 1.00 | down | 2.61  | down | 1.16  | up   | 1.50 | down | 1.29 | down | ABA |
| Os.15220.1.S2_at   | LOC_Os07g07230 | protein kinase, putative, expressed                                                        | 1.08 | down | 1.11 | down | 2.15  | up   | 1.01  | down | 1.12 | up   | 1.02 | up   | ABA |
| Os.15259.1.S2_at   | LOC_Os09g24990 | CAF1 family ribonuclease containing protein, putative, expressed                           | 1.04 | down | 1.10 | down | 2.04  | up   | 1.00  | up   | 1.01 | down | 1.00 | down | ABA |
| Os.15260.1.S1_s_at | LOC_Os01g70550 | heparan-alpha-glucosaminide N-acetyltransferase, putative, expressed                       | 1.12 | down | 1.08 | up   | 4.45  | up   | 1.03  | down | 1.01 | up   | 1.30 | down | ABA |
| Os.15281.1.S1_x_at | LOC_Os07g46920 | sex determination protein tasselseed-2, putative, expressed                                | 2.12 | down | 1.66 | down | 2.30  | down | 4.63  | down | 1.07 | up   | 5.05 | up   | 4   |
| Os.15298.1.S1_at   | LOC_Os03g19990 | WD40-like Beta Propeller Repeat family protein, expressed                                  | 1.53 | down | 1.14 | down | 10.38 | down | 1.72  | up   | 1.98 | down | 1.06 | up   | ABA |
| Os.153.1.S1_at     | LOC_Os05g41990 | peroxidase precursor, putative, expressed                                                  | 1.98 | down | 1.87 | down | 6.78  | down | 1.01  | down | 2.00 | down | 1.36 | down | 3   |
| Os.15304.1.A1_at   | LOC_Os02g10780 | SPX domain containing protein, putative, expressed                                         | 1.02 | down | 1.73 | down | 4.66  | up   | 1.21  | up   | 1.37 | up   | 1.98 | down | ABA |
| Os.15398.1.S1_at   | LOC_Os07g17970 | AMP-binding domain containing protein, expressed                                           | 1.57 | down | 1.21 | down | 5.70  | down | 1.05  | up   | 1.86 | down | 1.10 | up   | ABA |
| Os.15426.1.S1_at   | LOC_Os07g35370 | TKL_IRAK_DUF26-1c.15 - DUF26 kinases have homology to DUF26 containing loci, expressed     | 1.23 | down | 1.11 | down | 7.09  | down | 1.57  | up   | 1.10 | down | 1.02 | down | ABA |
| Os.15428.1.S1_at   | LOC_Os01g50622 | DNA-binding protein DSP1, putative, expressed                                              | 2.03 | up   | 1.62 | up   | 3.49  | down | 1.00  | up   | 1.22 | down | 1.39 | down | 2   |
| Os.15430.1.A1_at   | LOC_Os02g48170 | class E vacuolar protein-sorting machinery protein HSE1, putative, expressed               | 1.17 | up   | 1.54 | down | 3.94  | up   | 1.01  | down | 1.12 | up   | 1.10 | down | ABA |
| Os.15454.2.S1_at   | LOC_Os06g06760 | protein kinase, putative, expressed                                                        | 1.10 | down | 1.39 | down | 3.67  | up   | 1.17  | up   | 1.37 | up   | 1.30 | up   | ABA |
| Os.15471.1.S1_at   | LOC_Os07g44410 | WD40-like Beta Propeller Repeat family protein, expressed                                  | 1.13 | up   | 1.19 | up   | 6.95  | up   | 1.55  | up   | 6.58 | up   | 1.73 | up   | 2   |
| Os.15490.1.S1_at   | LOC_Os01g16170 | PQ loop repeat domain containing protein, expressed                                        | 1.43 | up   | 1.04 | up   | 6.01  | up   | 1.28  | down | 3.42 | up   | 1.03 | up   | 2   |
| Os.15557.1.S1_at   | CT829996       | Oryza sativa (indica cultivar-group) cDNA clone:OSIGCSN033J11, full insert sequence        | 1.37 | up   | 1.25 | down | 56.84 | up   | 1.05  | up   | 5.98 | up   | 1.28 | up   | 2   |
| Os.15573.1.A1_s_at | LOC_Os04g58734 | expressed protein                                                                          | 7.44 | up   | 1.50 | down | 1.66  | up   | 1.22  | down | 1.06 | up   | 1.46 | down | IAA |
| Os.15574.1.S1_at   | LOC_Os03g08390 | expressed protein                                                                          | 1.15 | up   | 1.06 | up   | 3.99  | up   | 1.06  | down | 1.24 | down | 1.18 | down | ABA |
| Os.15580.1.S1_at   | LOC_Os03g42600 | expressed protein                                                                          | 1.05 | up   | 1.82 | down | 5.68  | up   | 1.79  | down | 1.27 | up   | 1.28 | down | ABA |
| Os.15587.1.S1_x_at | LOC_Os04g41100 | cyclin-dependent kinase G-2, putative, expressed                                           | 1.06 | up   | 1.02 | down | 2.16  | up   | 1.08  | down | 1.19 | up   | 1.09 | down | ABA |
| Os.15637.1.S1_s_at | LOC_Os03g14420 | cytochrome P450, putative, expressed                                                       | 1.61 | up   | 1.26 | down | 2.28  | up   | 1.20  | down | 1.09 | down | 1.02 | up   | ABA |
| Os.15671.1.A2_at   | LOC_Os11g42510 | tyrosine aminotransferase, putative, expressed                                             | 1.22 | down | 1.05 | up   | 2.02  | up   | 1.04  | up   | 1.55 | up   | 1.20 | up   | ABA |
| Os.15679.1.S1_s_at | LOC_Os08g35210 | ferric reductase, putative, expressed                                                      | 1.52 | down | 1.02 | up   | 3.00  | down | 1.11  | down | 1.72 | down | 1.52 | up   | ABA |
| Os.15696.1.S1_a_at | LOC_Os02g43010 | vacuolar-processing enzyme precursor, putative, expressed                                  | 1.02 | up   | 1.01 | up   | 5.60  | up   | 1.10  | up   | 1.32 | up   | 1.15 | up   | ABA |
| Os.15700.1.S1_at   | LOC_Os05g07130 | 6PF-2-K/Fru-2,6-P2ASE liver isozyme, putative, expressed                                   | 1.20 | up   | 1.01 | up   | 2.78  | down | 1.05  | down | 1.41 | down | 1.12 | down | ABA |
| Os.15708.1.S1_a_at | LOC_Os04g38720 | no apical meristem protein, putative, expressed                                            | 1.06 | up   | 1.26 | up   | 12.17 | up   | 1.36  | down | 1.31 | down | 1.47 | down | ABA |
| Os.15711.1.S1_at   | LOC_Os09g28310 | bZIP transcription factor, putative, expressed                                             | 1.04 | up   | 1.02 | down | 2.49  | up   | 1.33  | down | 1.15 | up   | 1.08 | down | ABA |
| Os.15713.1.S1_a_at | LOC_Os04g42620 | uncharacterized protein At4g06744 precursor, putative, expressed                           | 1.11 | down | 1.33 | down | 3.22  | down | 1.06  | down | 1.37 | down | 1.06 | up   | ABA |
| Os.15729.2.S1_x_at | LOC_Os04g49570 | glutamate receptor, putative, expressed                                                    | 1.39 | up   | 1.06 | down | 2.77  | down | 1.45  | down | 1.28 | down | 1.10 | up   | ABA |
| Os.15732.1.S1_s_at | LOC_Os03g29850 | metal cation transporter, putative, expressed                                              | 1.22 | down | 1.36 | down | 2.04  | down | 1.20  | up   | 1.04 | up   | 1.02 | down | ABA |
| Os.15738.1.S1_at   | LOC_Os12g44020 | Ser/Thr protein phosphatase family protein, putative, expressed                            | 1.38 | down | 1.35 | up   | 3.42  | down | 1.25  | up   | 1.37 | down | 2.10 | down | 2   |

|                    |                |                                                                                    |       |      |      |      |        |      |      |      |      |      |      |      |     |
|--------------------|----------------|------------------------------------------------------------------------------------|-------|------|------|------|--------|------|------|------|------|------|------|------|-----|
| Os.15747.1.A1_at   | LOC_Os09g39910 | ABC transporter, ATP-binding protein, putative, expressed                          | 1.02  | up   | 1.23 | down | 21.15  | up   | 1.12 | up   | 3.51 | up   | 1.71 | up   | 2   |
| Os.15757.1.S1_at   | LOC_Os02g39710 | CCT/B-box zinc finger protein, putative, expressed                                 | 1.38  | down | 1.01 | down | 2.08   | down | 1.07 | up   | 1.49 | down | 1.48 | down | ABA |
| Os.15767.2.S1_x_at | LOC_Os10g37210 | FAD dependent oxidoreductase domain containing protein, expressed                  | 1.15  | up   | 1.02 | up   | 2.55   | up   | 1.14 | up   | 1.78 | up   | 1.42 | up   | ABA |
| Os.15780.1.S1_at   | LOC_Os02g08220 | expressed protein                                                                  | 1.25  | up   | 1.00 | down | 5.00   | down | 1.10 | down | 1.16 | down | 1.19 | down | ABA |
| Os.15789.1.S1_at   | LOC_Os12g08920 | peroxidase precursor, putative, expressed                                          | 1.25  | up   | 1.85 | up   | 8.82   | down | 2.19 | up   | 1.54 | down | 1.24 | down | 2   |
| Os.15789.1.S1_x_at | LOC_Os12g08920 | peroxidase precursor, putative, expressed                                          | 1.15  | up   | 1.60 | up   | 7.39   | down | 1.72 | up   | 1.48 | down | 1.25 | down | ABA |
| Os.15797.1.S1_at   | LOC_Os05g06990 | TKL_IRAK_CrRLK1L-1.10 - The CrRLK1L-1 subfamily has homology to the CrRLK1L        | 1.32  | up   | 1.07 | down | 3.33   | up   | 1.22 | up   | 1.23 | up   | 1.11 | down | ABA |
| Os.15798.1.S1_at   | LOC_Os06g07040 | OslAA20 - Auxin-responsive Aux/IAA gene family member, expressed                   | 21.52 | up   | 1.00 | up   | 5.69   | up   | 1.27 | up   | 2.22 | up   | 1.31 | up   | 3   |
| Os.15799.1.S1_at   | LOC_Os03g11420 | Os3bglu6 - beta-glucosidase/beta-fucosidase/beta-galactosidase, expressed          | 1.06  | down | 1.09 | up   | 4.96   | up   | 1.17 | up   | 1.01 | down | 1.79 | down | ABA |
| Os.158.1.S1_at     | LOC_Os10g02070 | peroxidase precursor, putative, expressed                                          | 1.69  | down | 1.56 | down | 10.61  | down | 1.36 | up   | 1.37 | down | 2.22 | up   | 2   |
| Os.15807.1.S1_s_at | LOC_Os12g32260 | expressed protein                                                                  | 1.62  | down | 1.24 | up   | 2.16   | down | 1.11 | down | 1.17 | down | 1.12 | up   | ABA |
| Os.15809.1.S1_at   | AK108095       | Oryza sativa Japonica Group cDNA clone:002-139-A07, full insert sequence.          | 1.14  | down | 1.03 | down | 7.98   | up   | 1.09 | down | 1.08 | up   | 1.05 | down | ABA |
| Os.15813.1.S1_at   | LOC_Os03g56610 | expressed protein                                                                  | 1.18  | up   | 1.05 | up   | 2.18   | down | 1.10 | down | 1.11 | down | 1.28 | up   | ABA |
| Os.15815.1.S1_at   | LOC_Os08g01490 | cytochrome P450, putative, expressed                                               | 1.05  | down | 1.27 | up   | 2.60   | up   | 1.66 | down | 1.68 | up   | 1.82 | up   | ABA |
| Os.15815.2.S1_x_at | LOC_Os08g01490 | cytochrome P450, putative, expressed                                               | 1.05  | down | 1.08 | up   | 3.30   | up   | 2.35 | down | 1.45 | up   | 2.36 | up   | 3   |
| Os.15821.3.A1_at   | LOC_Os05g01240 | AML1, putative, expressed                                                          | 1.25  | up   | 1.13 | up   | 3.38   | up   | 1.20 | down | 1.11 | down | 1.91 | down | ABA |
| Os.15822.1.S1_s_at | LOC_Os08g32980 | expressed protein                                                                  | 1.24  | up   | 1.04 | up   | 6.53   | up   | 1.49 | down | 1.19 | up   | 1.01 | up   | ABA |
| Os.15825.1.S2_at   | LOC_Os04g53720 | SNF2 family N-terminal domain containing protein, expressed                        | 1.08  | down | 1.37 | down | 2.59   | up   | 1.20 | up   | 1.56 | up   | 1.12 | down | ABA |
| Os.15830.1.S1_at   | LOC_Os05g39760 | VHS and GAT domain containing protein, expressed                                   | 1.60  | down | 1.10 | up   | 9.17   | up   | 1.68 | up   | 1.56 | up   | 3.53 | up   | 2   |
| Os.15841.1.S1_a_at | LOC_Os11g05290 | stress responsive A/B Barrel domain containing protein, expressed                  | 1.17  | up   | 1.53 | up   | 2.93   | down | 1.29 | down | 1.81 | down | 1.48 | down | ABA |
| Os.15852.1.S1_at   | LOC_Os10g03320 | UDP-glucuronosyl and UDP-glucosyl transferase domain containing protein, expressed | 1.06  | up   | 1.25 | up   | 2.32   | up   | 1.25 | up   | 1.19 | up   | 1.22 | up   | ABA |
| Os.15853.1.S1_at   | LOC_Os02g37610 | expressed protein                                                                  | 1.19  | down | 1.67 | up   | 2.64   | up   | 1.68 | down | 1.24 | down | 3.02 | down | 2   |
| Os.15867.1.A1_at   | LOC_Os02g45690 | uncharacterized mscS family protein, putative, expressed                           | 1.01  | down | 1.02 | up   | 18.63  | up   | 1.00 | down | 1.00 | up   | 1.01 | up   | ABA |
| Os.15874.1.A1_at   | LOC_Os03g60570 | ZOS3-22 - C2H2 zinc finger protein, expressed                                      | 1.70  | up   | 1.64 | up   | 3.41   | up   | 1.64 | down | 2.87 | up   | 1.32 | down | 2   |
| Os.15908.1.S1_s_at | LOC_Os01g72330 | OsRR4 type-A response regulator, expressed                                         | 2.13  | down | 7.82 | up   | 1.90   | down | 1.19 | up   | 4.50 | down | 3.33 | down | 4   |
| Os.15913.1.S1_a_at | LOC_Os02g37880 | cyclin G-associated kinase, putative, expressed                                    | 1.11  | up   | 1.05 | down | 2.07   | up   | 1.09 | down | 1.05 | down | 1.26 | down | ABA |
| Os.15914.1.S1_at   | LOC_Os09g23350 | trehalose synthase, putative, expressed                                            | 1.72  | up   | 1.19 | down | 3.03   | up   | 1.01 | down | 1.25 | up   | 1.10 | up   | ABA |
| Os.15918.1.S1_x_at | LOC_Os03g63060 | P21-Rho-binding domain containing protein, putative, expressed                     | 1.21  | down | 1.03 | up   | 2.24   | up   | 1.30 | down | 1.32 | down | 1.22 | down | ABA |
| Os.1592.1.S1_at    | LOC_Os01g51380 | ATP synthase, putative, expressed                                                  | 1.22  | up   | 1.04 | up   | 2.86   | up   | 1.61 | down | 1.21 | up   | 1.05 | down | ABA |
| Os.15938.1.S1_at   | LOC_Os03g17790 | OsRC12-5 - Putative low temperature and salt responsive protein, expressed         | 1.21  | up   | 1.29 | up   | 52.85  | up   | 1.18 | down | 1.22 | up   | 1.18 | up   | ABA |
| Os.15939.1.S2_at   | LOC_Os01g53670 | ENTH domain containing protein, expressed                                          | 1.02  | up   | 1.14 | down | 2.90   | up   | 1.17 | up   | 1.36 | up   | 1.02 | down | ABA |
| Os.15941.2.S1_x_at | LOC_Os01g65510 | OsFBX31 - F-box domain containing protein, expressed                               | 1.35  | up   | 1.17 | up   | 11.20  | up   | 1.27 | down | 1.58 | down | 1.99 | down | ABA |
| Os.15951.1.S1_at   | LOC_Os03g48150 | Oryza sativa Japonica Group cDNA clone:J013022N15, full insert sequence.           | 1.26  | down | 1.06 | up   | 2.16   | down | 1.11 | down | 1.39 | down | 1.33 | down | ABA |
| Os.15985.1.S1_at   | LOC_Os11g24570 | PPR repeat domain containing protein, putative, expressed                          | 1.14  | up   | 1.21 | up   | 2.27   | down | 1.02 | up   | 1.27 | down | 1.35 | down | ABA |
| Os.15988.1.S1_at   | LOC_Os06g27770 | isoflavone reductase homolog IRL, putative, expressed                              | 1.79  | up   | 1.01 | up   | 5.43   | up   | 1.44 | up   | 3.11 | up   | 1.28 | up   | 2   |
| Os.16010.1.S1_at   | LOC_Os05g42150 | OsGH3.4 - Probable indole-3-acetic acid-amido synthetase, expressed                | 20.34 | up   | 1.90 | up   | 1.20   | up   | 1.34 | up   | 1.05 | up   | 1.81 | up   | IAA |
| Os.16018.1.S1_at   | LOC_Os01g63010 | universal stress protein domain containing protein, putative, expressed            | 1.01  | down | 1.00 | down | 4.94   | up   | 1.01 | down | 1.00 | up   | 1.01 | up   | ABA |
| Os.16030.1.S1_at   | AK107816       | Oryza sativa (japonica cultivar-group) Os03g0371400 (Os03g0371400) mRNA, partial   | 3.06  | up   | 1.15 | up   | 1.78   | down | 3.09 | down | 1.81 | down | 3.34 | down | 3   |
| Os.16037.1.S1_at   | AK242368       | Oryza sativa Japonica Group cDNA, clone: J080035A07, full insert sequence.         | 1.08  | up   | 1.03 | down | 4.42   | down | 1.57 | down | 1.02 | up   | 1.04 | down | ABA |
| Os.16039.1.S1_s_at | LOC_Os02g28720 | spotted leaf 11, putative, expressed                                               | 1.27  | up   | 1.13 | down | 3.57   | up   | 1.24 | down | 1.25 | up   | 1.13 | down | ABA |
| Os.16041.1.S1_at   | LOC_Os03g16940 | glyoxalase family protein, putative, expressed                                     | 1.00  | up   | 1.00 | up   | 90.68  | up   | 1.18 | down | 1.16 | down | 1.15 | down | ABA |
| Os.16043.1.S1_at   | LOC_Os11g45290 | retrotransposon protein, putative, unclassified, expressed                         | 1.10  | up   | 1.09 | down | 2.14   | down | 1.21 | down | 1.91 | down | 1.36 | down | ABA |
| Os.16044.1.S1_at   | LOC_Os02g30910 | nodulin MtN3 family protein, putative, expressed                                   | 7.27  | up   | 1.37 | up   | 705.84 | up   | 1.89 | up   | 1.17 | up   | 1.43 | up   | 2   |
| Os.16049.1.S1_at   | LOC_Os09g36360 | protein of unknown function containing protein, expressed                          | 1.02  | up   | 1.00 | up   | 2.92   | up   | 1.00 | up   | 1.13 | up   | 1.02 | down | ABA |
| Os.16068.1.S1_at   | AK064638       | Oryza sativa Japonica Group cDNA clone:002-114-A10, full insert sequence.          | 1.25  | up   | 1.19 | up   | 11.57  | up   | 1.02 | up   | 2.17 | up   | 1.02 | up   | 2   |
| Os.16068.3.S1_at   | LOC_Os02g47840 | universal stress protein domain containing protein, putative, expressed            | 1.10  | up   | 1.15 | up   | 7.60   | up   | 1.18 | down | 3.59 | up   | 1.15 | up   | 2   |
| Os.16089.1.A1_at   | LOC_Os05g32320 | integral membrane transporter family protein, putative, expressed                  | 1.24  | up   | 1.18 | down | 9.02   | up   | 1.11 | down | 1.04 | up   | 1.03 | down | ABA |
| Os.16105.1.S1_at   | LOC_Os10g07450 | expressed protein                                                                  | 1.16  | down | 1.07 | down | 2.28   | down | 1.14 | up   | 1.05 | up   | 1.12 | up   | ABA |
| Os.16119.1.S1_at   | LOC_Os03g05310 | pheophorbide a oxygenase, chloroplast precursor, putative, expressed               | 1.38  | down | 1.41 | down | 2.91   | up   | 1.31 | up   | 1.26 | up   | 1.61 | up   | ABA |
| Os.16133.1.S1_at   | LOC_Os01g11960 | histone-lysine N-methyltransferase ATX5, putative, expressed                       | 1.09  | down | 1.13 | down | 2.84   | up   | 1.15 | down | 1.05 | down | 1.36 | down | ABA |
| Os.16142.1.S1_at   | LOC_Os03g31510 | cysteine proteinase inhibitor 8 precursor, putative, expressed                     | 1.01  | up   | 1.04 | down | 2.98   | up   | 1.27 | up   | 1.25 | up   | 1.06 | up   | ABA |
| Os.16151.1.S1_at   | LOC_Os03g12160 | leucine-rich repeat family protein, putative, expressed                            | 1.17  | down | 1.37 | down | 5.52   | up   | 1.17 | up   | 1.31 | up   | 1.04 | up   | ABA |
| Os.16163.1.S1_at   | LOC_Os02g15740 | expressed protein                                                                  | 1.01  | up   | 1.01 | up   | 261.96 | up   | 1.08 | up   | 1.01 | down | 1.02 | up   | ABA |
| Os.16164.1.S1_at   | LOC_Os06g10530 | expressed protein                                                                  | 1.21  | up   | 1.61 | up   | 49.91  | up   | 1.35 | up   | 1.34 | up   | 1.10 | down | ABA |
| Os.1617.1.S1_at    | LOC_Os01g04910 | TP53RK-binding protein, putative, expressed                                        | 1.06  | down | 1.13 | up   | 2.04   | down | 1.13 | down | 1.41 | down | 1.11 | down | ABA |

|                    |                |                                                                                                 |      |      |      |      |       |      |      |      |      |      |       |      |     |
|--------------------|----------------|-------------------------------------------------------------------------------------------------|------|------|------|------|-------|------|------|------|------|------|-------|------|-----|
| Os.16187.1.S1_at   | LOC_Os02g10630 | GRAM and C2 domains containing protein, putative, expressed                                     | 1.12 | up   | 1.13 | up   | 4.62  | up   | 1.01 | up   | 1.16 | up   | 1.64  | down | ABA |
| Os.16214.1.S1_at   | LOC_Os11g05490 | expressed protein                                                                               | 1.64 | down | 2.04 | up   | 8.04  | down | 1.19 | down | 1.02 | up   | 1.58  | down | 2   |
| Os.16218.1.S1_at   | LOC_Os06g30370 | osMFT1 MFT-Like1 homologous to Mother of FT and TFL1 gene; contains Pfam profilin domain        | 1.49 | up   | 1.26 | up   | 88.45 | up   | 1.10 | down | 1.44 | up   | 1.16  | down | ABA |
| Os.16231.1.S1_s_at | LOC_Os04g36890 | peptidyl-prolyl cis-trans isomerase, FKBP-type, putative, expressed                             | 1.04 | down | 1.03 | up   | 2.29  | down | 1.04 | down | 1.01 | down | 1.10  | up   | ABA |
| Os.1625.1.S1_at    | LOC_Os01g05010 | mitochondrial glycoprotein, putative, expressed                                                 | 1.11 | up   | 1.12 | up   | 2.54  | down | 1.27 | up   | 1.34 | down | 1.02  | down | ABA |
| Os.16282.1.A1_at   | LOC_Os06g37080 | L-ascorbate oxidase precursor, putative, expressed                                              | 1.12 | down | 1.05 | up   | 2.23  | down | 1.13 | up   | 1.40 | down | 1.18  | up   | ABA |
| Os.16320.1.S1_at   | LOC_Os07g39520 | STE_PAK_Ste20_Slob_Wnk.5 - STE kinases include homologs to sterile 7, sterile 11 and sterile 22 | 1.89 | up   | 1.16 | up   | 6.22  | up   | 1.29 | up   | 3.47 | up   | 1.24  | up   | 2   |
| Os.16326.1.S1_at   | LOC_Os02g17780 | ent-kaurene synthase, chloroplast precursor, putative, expressed                                | 1.48 | down | 1.99 | up   | 8.36  | down | 1.29 | down | 2.15 | down | 1.42  | up   | 3   |
| Os.16327.1.S1_at   | LOC_Os08g26230 | expressed protein                                                                               | 1.00 | down | 1.39 | down | 2.40  | down | 1.10 | down | 1.31 | up   | 1.38  | up   | ABA |
| Os.16333.1.S1_at   | LOC_Os04g40310 | dehydrogenase, putative, expressed                                                              | 1.36 | up   | 1.01 | up   | 1.82  | up   | 1.23 | up   | 2.43 | up   | 1.57  | up   | SA  |
| Os.16334.1.S1_at   | LOC_Os06g15380 | acylphosphatase, putative                                                                       | 1.30 | down | 1.00 | down | 2.08  | up   | 1.38 | up   | 1.36 | up   | 1.29  | up   | ABA |
| Os.16365.1.S1_at   | LOC_Os09g32100 | expressed protein                                                                               | 1.28 | down | 1.29 | down | 16.01 | down | 1.06 | down | 1.69 | down | 1.06  | down | ABA |
| Os.1637.1.S1_at    | LOC_Os01g02020 | acetyl-CoA acetyltransferase, cytosolic, putative, expressed                                    | 1.12 | up   | 1.03 | down | 4.86  | up   | 1.39 | up   | 2.88 | up   | 2.35  | up   | 3   |
| Os.16429.1.S1_at   | LOC_Os01g52630 | regulator of chromosome condensation, putative, expressed                                       | 1.05 | down | 1.01 | down | 4.36  | up   | 1.04 | up   | 1.09 | up   | 1.13  | up   | ABA |
| Os.16453.1.S1_at   | LOC_Os12g39400 | ZOS12-09 - C2H2 zinc finger protein, expressed                                                  | 1.05 | down | 1.03 | up   | 12.58 | up   | 1.20 | up   | 1.31 | up   | 1.19  | up   | ABA |
| Os.16463.1.S1_at   | LOC_Os04g58310 | CBS domain-containing protein, putative, expressed                                              | 1.08 | down | 1.35 | down | 20.96 | up   | 1.14 | down | 1.00 | up   | 1.14  | up   | ABA |
| Os.16506.1.A1_at   | LOC_Os12g01830 | staphylococcal nuclease homologue, putative, expressed                                          | 2.21 | down | 1.45 | down | 4.10  | down | 1.23 | up   | 1.36 | down | 1.79  | down | 2   |
| Os.16532.1.S1_at   | LOC_Os03g52370 | PllI4 - Proteinase inhibitor II family protein precursor, expressed                             | 1.02 | down | 2.14 | up   | 1.31  | up   | 1.10 | down | 1.88 | up   | 1.12  | down | BAP |
| Os.16558.1.S1_at   | LOC_Os01g73200 | peroxidase precursor, putative, expressed                                                       | 1.00 | up   | 1.61 | up   | 1.33  | down | 6.19 | up   | 1.17 | up   | 1.14  | up   | ACC |
| Os.16582.1.S1_at   | LOC_Os07g42910 | cytochrome c oxidase subunit, putative, expressed                                               | 1.37 | down | 1.05 | down | 6.80  | up   | 1.37 | up   | 1.55 | up   | 1.26  | up   | ABA |
| Os.16605.1.S1_at   | LOC_Os10g30280 | OsFBX386 - F-box domain containing protein, expressed                                           | 1.37 | down | 1.23 | down | 5.50  | down | 1.07 | down | 1.49 | down | 1.62  | down | ABA |
| Os.16612.1.S1_at   | AK100307       | Oryza sativa Japonica Group cDNA clone:J023078G11, full insert sequence.                        | 1.13 | down | 1.10 | up   | 2.11  | down | 1.03 | down | 1.21 | down | 1.23  | down | ABA |
| Os.16627.1.S1_at   | AK102170       | phytochelatin synthetase, putative                                                              | 1.42 | down | 1.06 | down | 2.18  | down | 1.22 | down | 1.30 | down | 1.38  | up   | ABA |
| Os.1665.1.S1_a_at  | LOC_Os01g07300 | uncharacterized 50.6 kDa protein in the 5region of gyrA and gyrB, putative, expressed           | 1.82 | up   | 1.58 | up   | 2.14  | up   | 1.57 | up   | 1.95 | up   | 1.30  | down | ABA |
| Os.1665.2.S1_x_at  | LOC_Os01g07300 | uncharacterized 50.6 kDa protein in the 5region of gyrA and gyrB, putative, expressed           | 1.40 | up   | 1.45 | up   | 2.02  | up   | 1.63 | up   | 1.87 | up   | 1.17  | down | ABA |
| Os.16704.1.S1_at   | LOC_Os07g42940 | CAMK_CAMK like.7 - CAMK includes calcium/calmodulin dependent protein kinases, expressed        | 1.03 | down | 1.32 | up   | 2.42  | down | 1.06 | up   | 1.37 | down | 1.03  | down | ABA |
| Os.16712.1.S1_at   | LOC_Os03g02560 | cyclin-like F-box, putative, expressed                                                          | 1.11 | up   | 1.16 | down | 5.55  | up   | 1.05 | up   | 1.96 | up   | 1.04  | up   | ABA |
| Os.16743.1.S1_at   | LOC_Os12g01930 | lipase-related, putative, expressed                                                             | 1.28 | up   | 1.23 | up   | 2.27  | up   | 1.07 | up   | 1.19 | up   | 1.08  | down | ABA |
| Os.16759.1.S1_at   | CT836471       | Oryza sativa (indica cultivar-group) cDNA clone:OSIGCSN061M08, full insert sequence.            | 1.00 | down | 1.01 | up   | 4.77  | up   | 1.01 | up   | 1.03 | up   | 1.02  | up   | ABA |
| Os.16760.1.S1_at   | LOC_Os07g47270 | protein kinase APK1B, chloroplast precursor, putative, expressed                                | 1.04 | up   | 1.12 | down | 4.15  | up   | 1.02 | up   | 1.04 | up   | 1.28  | down | ABA |
| Os.1678.1.S1_at    | LOC_Os01g07420 | hydrolase, alpha/beta fold family protein, putative, expressed                                  | 1.31 | down | 1.37 | up   | 3.80  | down | 1.22 | down | 2.11 | down | 1.26  | down | 2   |
| Os.16797.1.S1_at   | LOC_Os02g08320 | haemolysin-III, putative, expressed                                                             | 1.16 | down | 1.28 | up   | 5.02  | up   | 1.17 | up   | 1.19 | up   | 1.15  | down | ABA |
| Os.16804.1.S1_at   | LOC_Os10g23060 | expressed protein                                                                               | 1.23 | down | 1.41 | up   | 7.44  | up   | 1.04 | up   | 1.76 | down | 2.69  | down | 2   |
| Os.16810.1.S1_at   | LOC_Os03g11290 | expressed protein                                                                               | 1.06 | up   | 1.06 | up   | 2.92  | up   | 1.02 | down | 1.09 | down | 1.05  | up   | ABA |
| Os.16862.1.S1_at   | LOC_Os03g02610 | glycosyl hydrolases family 16 protein, protein, expressed                                       | 1.13 | down | 1.15 | down | 2.49  | down | 1.11 | down | 1.29 | down | 1.14  | down | ABA |
| Os.16879.1.S1_at   | LOC_Os06g20820 | expressed protein                                                                               | 1.05 | down | 1.09 | down | 1.80  | up   | 1.01 | down | 2.27 | up   | 1.45  | up   | SA  |
| Os.16889.1.S1_a_at | LOC_Os01g17320 | PPR repeat domain containing protein, putative, expressed                                       | 1.11 | down | 1.04 | up   | 2.07  | down | 1.20 | up   | 1.23 | down | 1.04  | down | ABA |
| Os.16899.1.S1_at   | LOC_Os07g30150 | phosphoribosyl transferase, putative, expressed                                                 | 1.09 | up   | 2.95 | up   | 8.65  | down | 1.38 | up   | 2.57 | down | 1.49  | down | 3   |
| Os.16902.1.S1_at   | LOC_Os02g41780 | transporter-related, putative, expressed                                                        | 1.04 | up   | 1.15 | down | 8.41  | down | 1.67 | down | 2.04 | down | 1.11  | down | 2   |
| Os.16912.1.A1_at   | LOC_Os02g53994 | DUF1771 domain containing protein, putative, expressed                                          | 1.11 | up   | 1.19 | down | 2.56  | up   | 1.18 | down | 1.12 | down | 1.18  | down | ABA |
| Os.16914.1.S2_at   | LOC_Os02g27400 | OsFBX49 - F-box domain containing protein, expressed                                            | 1.12 | up   | 1.02 | down | 2.39  | up   | 1.14 | up   | 1.11 | up   | 1.22  | up   | ABA |
| Os.16922.1.S1_at   | LOC_Os09g33530 | expressed protein                                                                               | 1.14 | down | 1.38 | up   | 2.22  | up   | 1.17 | up   | 1.09 | up   | 1.70  | up   | ABA |
| Os.16968.1.S1_at   | LOC_Os03g03990 | signal recognition particle 43 kDa protein, chloroplast precursor, putative, expressed          | 1.04 | down | 1.15 | up   | 3.65  | down | 1.24 | down | 1.67 | down | 1.47  | down | ABA |
| Os.16973.1.S1_at   | LOC_Os02g35830 | extracellular ligand-gated ion channel, putative, expressed                                     | 1.45 | up   | 1.02 | up   | 3.13  | up   | 1.28 | down | 1.10 | up   | 1.31  | down | ABA |
| Os.16987.1.S1_at   | LOC_Os04g47700 | expressed protein                                                                               | 1.02 | up   | 1.38 | up   | 9.97  | up   | 1.26 | down | 1.30 | up   | 1.19  | down | ABA |
| Os.170.1.S1_at     | LOC_Os01g64110 | glycosyl hydrolase, putative, expressed                                                         | 1.49 | up   | 1.07 | up   | 4.51  | down | 1.28 | up   | 1.17 | down | 1.40  | down | ABA |
| Os.17002.1.S1_at   | LOC_Os01g26039 | expressed protein                                                                               | 1.10 | up   | 1.05 | up   | 8.55  | up   | 1.11 | up   | 1.09 | up   | 1.63  | up   | ABA |
| Os.17074.1.S1_at   | LOC_Os03g44200 | beclin-1, putative, expressed                                                                   | 1.06 | up   | 1.00 | down | 2.28  | up   | 1.05 | down | 1.18 | up   | 1.08  | down | ABA |
| Os.17076.1.S1_at   | LOC_Os09g10340 | cytochrome P450, putative, expressed                                                            | 1.34 | down | 1.65 | up   | 30.76 | down | 6.91 | down | 1.56 | down | 3.48  | up   | 3   |
| Os.17112.1.S1_at   | LOC_Os03g18030 | leucoanthocyanidin dioxygenase, putative, expressed                                             | 1.24 | down | 1.11 | down | 2.07  | down | 1.06 | up   | 1.64 | up   | 18.46 | up   | 2   |
| Os.17125.1.S1_at   | LOC_Os08g41090 | peroxidase precursor, putative, expressed                                                       | 1.17 | down | 1.03 | down | 3.35  | down | 1.08 | down | 1.20 | down | 1.60  | down | ABA |
| Os.17136.1.S1_at   | LOC_Os03g51920 | peptidase, M50 family, putative, expressed                                                      | 1.42 | down | 1.14 | down | 21.49 | up   | 1.97 | down | 1.90 | up   | 1.47  | up   | ABA |
| Os.17144.1.A1_at   | LOC_Os04g59000 | protein kinase family protein, putative, expressed                                              | 1.26 | down | 1.41 | down | 2.05  | down | 1.05 | down | 1.73 | down | 1.09  | up   | ABA |
| Os.17147.1.S1_x_at | LOC_Os06g12310 | aquaporin protein, putative, expressed                                                          | 1.06 | up   | 1.13 | down | 4.70  | down | 1.34 | down | 1.98 | down | 1.26  | down | ABA |
| Os.17149.1.S1_at   | LOC_Os03g60910 | PPR repeat domain containing protein, putative, expressed                                       | 1.06 | up   | 1.16 | up   | 2.01  | down | 1.12 | down | 1.46 | down | 1.44  | down | ABA |

|                    |                |                                                                                     |      |      |      |      |       |      |      |      |      |      |      |      |     |
|--------------------|----------------|-------------------------------------------------------------------------------------|------|------|------|------|-------|------|------|------|------|------|------|------|-----|
| Os.17167.1.S1_at   | LOC_Os06g03540 | oligopeptide transporter, putative, expressed                                       | 1.25 | down | 1.62 | down | 2.83  | up   | 1.13 | up   | 1.45 | up   | 1.12 | down | ABA |
| Os.17173.1.S1_at   | LOC_Os05g08640 | transferase family protein, putative, expressed                                     | 1.57 | down | 1.27 | down | 1.12  | down | 1.15 | up   | 1.12 | up   | 2.33 | up   | JA  |
| Os.17189.1.S1_at   | LOC_Os05g44070 | ras-related protein, putative, expressed                                            | 1.29 | down | 1.02 | down | 3.87  | down | 1.06 | down | 1.42 | down | 1.40 | down | ABA |
| Os.17195.1.A1_at   | AK068772       | glycosyl hydrolase family 1 protein                                                 | 1.17 | down | 1.48 | down | 16.41 | up   | 1.71 | down | 1.33 | up   | 1.14 | up   | ABA |
| Os.17210.1.S1_at   | LOC_Os02g57750 | protein binding protein, putative, expressed                                        | 1.07 | down | 1.15 | down | 2.07  | up   | 1.01 | down | 1.10 | up   | 1.01 | down | ABA |
| Os.1723.1.S1_at    | LOC_Os01g18220 | expressed protein                                                                   | 1.22 | down | 2.10 | down | 27.18 | up   | 1.17 | down | 1.99 | up   | 1.37 | up   | 2   |
| Os.17250.1.S1_x_at | LOC_Os10g33170 | POT domain containing peptide transporter, putative, expressed                      | 1.02 | up   | 1.04 | down | 2.65  | down | 1.64 | down | 1.30 | down | 1.27 | down | ABA |
| Os.17280.1.A1_at   | LOC_Os06g22080 | diacylglycerol O-acyltransferase, putative, expressed                               | 1.01 | down | 1.01 | up   | 2.09  | up   | 1.17 | up   | 1.56 | up   | 1.06 | up   | ABA |
| Os.17286.1.S1_at   | LOC_Os03g21060 | No apical meristem protein, putative, expressed                                     | 1.09 | up   | 1.25 | down | 14.16 | up   | 1.47 | up   | 1.58 | up   | 1.08 | up   | ABA |
| Os.17315.1.S1_at   | LOC_Os03g04140 | serine acetyltransferase protein, putative, expressed                               | 1.07 | up   | 1.01 | down | 2.07  | down | 1.14 | down | 1.10 | down | 1.21 | down | ABA |
| Os.17323.2.S1_at   | LOC_Os02g48190 | expressed protein                                                                   | 1.21 | up   | 1.33 | down | 5.37  | up   | 1.23 | up   | 1.71 | up   | 2.23 | up   | 2   |
| Os.17334.1.S1_at   | AK069265       | Oryza sativa Japonica Group cDNA clone:J023012L05, full insert sequence.            | 1.14 | down | 1.02 | down | 3.60  | up   | 1.36 | up   | 1.04 | down | 1.15 | up   | ABA |
| Os.17334.1.S1_s_at | AK069265       | Oryza sativa Japonica Group cDNA clone:J023012L05, full insert sequence.            | 1.36 | down | 1.02 | down | 2.40  | up   | 1.32 | up   | 1.01 | up   | 1.14 | up   | ABA |
| Os.17334.2.S1_x_at | AK066992       | Oryza sativa Japonica Group cDNA clone:J013089P17, full insert sequence.            | 1.19 | down | 1.02 | down | 2.41  | up   | 1.28 | up   | 1.02 | down | 1.26 | up   | ABA |
| Os.17348.1.S1_at   | LOC_Os05g39070 | NLI interacting factor-like phosphatase, putative, expressed                        | 1.12 | up   | 1.04 | up   | 2.51  | up   | 1.06 | down | 1.24 | up   | 1.02 | down | ABA |
| Os.17353.1.S1_at   | LOC_Os06g45380 | vacuolar-sorting receptor precursor, putative, expressed                            | 1.13 | down | 1.12 | up   | 2.44  | down | 1.01 | down | 1.27 | down | 1.05 | up   | ABA |
| Os.17359.1.S1_at   | LOC_Os05g27780 | expressed protein                                                                   | 1.07 | down | 1.14 | up   | 2.65  | up   | 1.01 | up   | 1.00 | up   | 1.00 | down | ABA |
| Os.17368.1.S1_at   | LOC_Os02g52420 | peptidase, M24 family protein, putative, expressed                                  | 1.07 | up   | 1.09 | up   | 2.13  | down | 1.16 | down | 1.30 | down | 1.18 | down | ABA |
| Os.1740.1.S1_at    | LOC_Os01g26120 | membrane associated DUF588 domain containing protein, putative, expressed           | 1.25 | down | 1.11 | up   | 5.38  | down | 1.28 | down | 1.51 | up   | 1.22 | up   | ABA |
| Os.17403.1.S1_a_at | LOC_Os03g42070 | cyclin, putative, expressed                                                         | 1.66 | down | 1.60 | down | 3.52  | down | 1.18 | up   | 1.21 | down | 1.62 | down | ABA |
| Os.17405.1.S1_a_at | LOC_Os12g31860 | ureide permease, putative, expressed                                                | 1.08 | down | 1.03 | down | 3.64  | up   | 1.14 | up   | 1.87 | up   | 1.05 | down | ABA |
| Os.17419.1.S1_at   | LOC_Os10g09850 | EF hand family protein, putative, expressed                                         | 1.05 | down | 1.04 | down | 15.53 | up   | 1.10 | down | 1.13 | down | 1.03 | up   | ABA |
| Os.17424.1.S1_at   | LOC_Os03g24730 | expressed protein                                                                   | 1.21 | up   | 1.13 | up   | 4.28  | up   | 1.34 | down | 1.34 | up   | 1.57 | down | ABA |
| Os.17424.1.S1_x_at | LOC_Os03g24730 | expressed protein                                                                   | 1.37 | up   | 1.24 | up   | 3.98  | up   | 1.35 | down | 1.22 | up   | 1.67 | down | ABA |
| Os.17433.1.S1_at   | LOC_Os09g33690 | Os9bglu32 - beta-glucosidase homologue, similar to G. max hydroxyisourate hydrolase | 1.00 | up   | 1.03 | down | 3.83  | up   | 1.01 | down | 1.04 | up   | 1.01 | up   | ABA |
| Os.17437.1.S1_at   | LOC_Os01g53390 | glucosyltransferase, putative, expressed                                            | 2.33 | down | 1.01 | up   | 1.92  | down | 1.67 | up   | 1.17 | up   | 1.84 | up   | IAA |
| Os.17446.1.S1_at   | LOC_Os04g48270 | OsFBX148 - F-box domain containing protein, expressed                               | 1.27 | up   | 1.04 | up   | 6.37  | up   | 1.28 | down | 1.11 | up   | 1.01 | up   | ABA |
| Os.17446.2.S1_at   | LOC_Os04g48270 | OsFBX148 - F-box domain containing protein, expressed                               | 1.62 | up   | 1.26 | up   | 9.69  | up   | 1.44 | down | 1.16 | up   | 1.08 | up   | ABA |
| Os.17484.1.S1_at   | LOC_Os04g35280 | neutral/alkaline invertase, putative, expressed                                     | 1.16 | up   | 1.11 | up   | 2.97  | up   | 1.20 | down | 1.09 | up   | 1.10 | down | ABA |
| Os.17491.1.S1_at   | LOC_Os10g35070 | alpha-galactosidase precursor, putative, expressed                                  | 1.07 | down | 1.02 | down | 34.60 | up   | 1.68 | down | 2.82 | up   | 1.02 | down | 2   |
| Os.17494.2.S1_at   | LOC_Os06g28194 | expressed protein                                                                   | 1.11 | up   | 1.46 | up   | 2.81  | down | 1.28 | down | 1.26 | down | 1.07 | down | ABA |
| Os.17496.1.S1_at   | LOC_Os12g16080 | expressed protein                                                                   | 1.07 | up   | 1.20 | down | 1.03  | down | 1.47 | down | 2.21 | up   | 1.03 | down | SA  |
| Os.17501.1.A1_at   | LOC_Os09g38410 | sialin, putative, expressed                                                         | 1.09 | up   | 1.23 | down | 2.95  | up   | 1.02 | up   | 1.33 | up   | 1.04 | up   | ABA |
| Os.17502.1.S1_at   | LOC_Os11g32880 | DEAD-box ATP-dependent RNA helicase, putative, expressed                            | 1.19 | up   | 1.32 | up   | 2.54  | down | 1.03 | down | 1.53 | down | 1.41 | down | ABA |
| Os.17506.1.S1_at   | LOC_Os10g32680 | expressed protein                                                                   | 1.05 | up   | 1.08 | up   | 6.51  | up   | 1.96 | up   | 3.67 | up   | 1.95 | up   | 2   |
| Os.17522.1.S1_s_at | LOC_Os10g37290 | DEFL6 - Defensin and Defensin-like DEFL family, expressed                           | 2.08 | down | 1.24 | up   | 20.46 | down | 1.03 | down | 1.42 | up   | 1.37 | down | 2   |
| Os.17554.1.S1_at   | LOC_Os08g37760 | zinc finger, C3HC4 type domain containing protein, expressed                        | 2.06 | down | 1.04 | down | 1.36  | down | 1.50 | up   | 1.30 | up   | 1.26 | up   | IAA |
| Os.17584.1.S1_at   | LOC_Os02g56860 | 3-ketoacyl-CoA synthase, putative, expressed                                        | 1.51 | up   | 1.55 | up   | 3.90  | up   | 1.37 | up   | 1.59 | up   | 1.58 | up   | ABA |
| Os.17619.1.S1_at   | LOC_Os02g17534 | xyloglucan fucosyltransferase, putative, expressed                                  | 1.23 | down | 1.05 | down | 2.66  | down | 1.08 | up   | 1.31 | down | 1.07 | down | ABA |
| Os.17623.1.S1_at   | LOC_Os07g49310 | omega-3 fatty acid desaturase, chloroplast precursor, putative, expressed           | 1.26 | up   | 1.19 | up   | 7.07  | down | 1.06 | down | 2.45 | down | 1.63 | down | 2   |
| Os.17652.1.S1_s_at | LOC_Os03g43720 | transporter family protein, putative, expressed                                     | 1.30 | up   | 1.10 | down | 17.29 | up   | 1.50 | up   | 2.83 | up   | 1.21 | up   | 2   |
| Os.17652.1.S2_s_at | LOC_Os03g43720 | transporter family protein, putative, expressed                                     | 1.11 | up   | 1.02 | down | 15.78 | up   | 1.41 | up   | 2.98 | up   | 1.27 | up   | 2   |
| Os.17653.1.S1_at   | LOC_Os03g55870 | membrane associated DUF588 domain containing protein, putative, expressed           | 1.89 | up   | 1.05 | down | 14.64 | up   | 1.37 | down | 1.03 | up   | 1.17 | down | ABA |
| Os.17655.1.S1_at   | LOC_Os02g49160 | OslAA8 - Auxin-responsive Aux/IAA gene family member, expressed                     | 1.26 | down | 1.03 | down | 2.68  | down | 1.50 | up   | 1.25 | up   | 1.04 | down | ABA |
| Os.17663.1.S1_at   | LOC_Os01g64860 | OsSub11 - Putative Subtilisin homologue, expressed                                  | 1.03 | up   | 1.08 | up   | 5.43  | down | 1.32 | down | 2.30 | down | 1.22 | down | 2   |
| Os.17691.1.S1_at   | LOC_Os08g35620 | HD domain containing protein, putative, expressed                                   | 1.02 | up   | 1.07 | down | 2.42  | up   | 1.01 | down | 1.17 | down | 1.14 | down | ABA |
| Os.17718.1.S1_at   | LOC_Os05g39410 | expressed protein                                                                   | 1.13 | up   | 1.24 | down | 4.66  | up   | 1.32 | up   | 1.81 | up   | 1.27 | up   | ABA |
| Os.17722.1.S1_at   | LOC_Os01g22249 | peroxidase precursor, putative, expressed                                           | 1.06 | down | 1.18 | up   | 7.08  | down | 2.55 | up   | 1.49 | down | 1.32 | up   | 2   |
| Os.17746.1.S1_s_at | LOC_Os01g64540 | anthocyanidin 3-O-glucosyltransferase, putative, expressed                          | 1.09 | down | 1.29 | up   | 3.66  | down | 1.79 | down | 1.34 | up   | 1.03 | down | ABA |
| Os.17761.1.S1_a_at | LOC_Os04g32110 | ACT domain containing protein, expressed                                            | 1.44 | down | 1.09 | up   | 2.11  | down | 1.28 | up   | 1.69 | down | 1.97 | up   | ABA |
| Os.17762.1.S1_at   | LOC_Os06g29844 | MATE efflux family protein, putative, expressed                                     | 1.10 | up   | 1.39 | down | 3.64  | up   | 1.05 | down | 1.32 | up   | 1.04 | down | ABA |
| Os.17765.1.A1_at   | LOC_Os05g37160 | tubulin/FtsZ domain containing protein, putative, expressed                         | 1.10 | down | 1.03 | down | 2.31  | down | 1.10 | down | 1.50 | down | 1.20 | down | ABA |
| Os.17787.1.S1_at   | LOC_Os07g48090 | CAMK_KIN1/SNF1/Nim1_like.30 - CAMK includes calcium/calmodulin dependent protein    | 1.18 | down | 1.28 | down | 2.10  | up   | 1.06 | down | 1.05 | up   | 1.60 | up   | ABA |
| Os.17805.1.S1_at   | LOC_Os01g63930 | cytochrome P450, putative, expressed                                                | 1.28 | up   | 1.30 | up   | 5.50  | up   | 1.08 | down | 1.25 | down | 2.68 | up   | 2   |
| Os.17841.2.S1_x_at | LOC_Os07g06940 | valyl-tRNA synthetase, putative, expressed                                          | 1.12 | up   | 1.01 | down | 2.45  | down | 1.16 | down | 1.52 | down | 1.26 | down | ABA |

|                    |                |                                                                                     |       |      |      |      |       |      |      |      |       |      |      |      |     |
|--------------------|----------------|-------------------------------------------------------------------------------------|-------|------|------|------|-------|------|------|------|-------|------|------|------|-----|
| Os.17890.1.S1_at   | LOC_Os03g22120 | sucrose synthase, putative, expressed                                               | 1.10  | up   | 1.08 | up   | 8.54  | up   | 1.20 | up   | 1.34  | up   | 1.33 | down | ABA |
| Os.17895.1.S1_a_at | LOC_Os10g30860 | nicotiana lesion-inducing like, putative, expressed                                 | 1.03  | down | 1.22 | down | 2.28  | down | 1.19 | down | 1.46  | down | 1.17 | up   | ABA |
| Os.17895.1.S1_at   | LOC_Os10g30870 | expressed protein                                                                   | 1.13  | down | 1.09 | down | 2.10  | down | 1.12 | down | 1.29  | down | 1.02 | up   | ABA |
| Os.17895.2.S1_x_at | LOC_Os10g30860 | nicotiana lesion-inducing like, putative, expressed                                 | 1.02  | down | 1.14 | down | 2.21  | down | 1.25 | down | 1.24  | down | 1.20 | up   | ABA |
| Os.17902.1.S1_at   | LOC_Os05g02420 | expressed protein                                                                   | 1.50  | down | 1.92 | down | 3.25  | down | 1.03 | down | 1.46  | down | 1.47 | down | ABA |
| Os.17921.1.S1_at   | LOC_Os05g47540 | CPuORF26 - conserved peptide uORF-containing transcript, expressed                  | 2.26  | down | 5.61 | up   | 47.08 | down | 1.29 | down | 13.79 | down | 5.55 | down | 5   |
| Os.17961.1.S1_a_at | LOC_Os02g20560 | fasciclin domain containing protein, expressed                                      | 1.03  | down | 1.27 | down | 5.76  | down | 1.20 | down | 1.50  | down | 1.12 | down | ABA |
| Os.17994.1.S1_at   | LOC_Os04g41300 | ribosome recycling factor, putative, expressed                                      | 1.10  | up   | 1.12 | up   | 2.25  | down | 1.06 | up   | 1.63  | down | 1.29 | down | ABA |
| Os.17997.1.S1_at   | LOC_Os10g26570 | phosphofructokinase, putative, expressed                                            | 1.07  | up   | 1.32 | down | 1.55  | up   | 1.07 | up   | 2.87  | up   | 2.10 | up   | 2   |
| Os.17997.2.S1_x_at | LOC_Os10g26570 | phosphofructokinase, putative, expressed                                            | 1.31  | up   | 1.41 | down | 1.51  | up   | 1.14 | down | 2.69  | up   | 2.28 | up   | 2   |
| Os.18019.1.S1_at   | LOC_Os08g18150 | WD domain, G-beta repeat domain containing protein, expressed                       | 1.41  | down | 1.07 | down | 2.96  | up   | 1.08 | down | 1.36  | down | 1.52 | down | ABA |
| Os.18064.1.S1_at   | LOC_Os08g40320 | retrotransposon protein, putative, unclassified                                     | 1.77  | down | 2.04 | down | 4.49  | up   | 1.31 | down | 14.82 | up   | 1.17 | up   | 3   |
| Os.18078.1.S1_at   | AK241601       | Oryza sativa Japonica Group cDNA, clone: J065183115, full insert sequence.          | 1.07  | down | 1.04 | down | 1.77  | up   | 1.46 | up   | 40.89 | up   | 1.08 | up   | SA  |
| Os.18082.1.S1_at   | LOC_Os03g51330 | GRAS family transcription factor domain containing protein, expressed               | 1.35  | down | 1.06 | down | 2.08  | up   | 1.25 | up   | 1.10  | up   | 1.03 | down | ABA |
| Os.18087.1.S1_at   | LOC_Os03g30570 | protein of unknown function DUF1675 domain containing protein, expressed            | 1.12  | up   | 1.13 | up   | 3.74  | up   | 1.28 | up   | 1.09  | down | 1.02 | up   | ABA |
| Os.18094.2.S1_a_at | LOC_Os05g46040 | protein phosphatase 2C, putative, expressed                                         | 1.67  | up   | 1.38 | down | 16.96 | up   | 1.24 | down | 1.71  | up   | 1.03 | up   | ABA |
| Os.18105.1.S1_at   | LOC_Os12g13640 | glycosyltransferase, putative, expressed                                            | 1.52  | up   | 1.09 | up   | 4.10  | up   | 1.08 | up   | 1.27  | up   | 1.25 | up   | ABA |
| Os.18109.1.S1_at   | LOC_Os10g34420 | lysM domain containing protein, putative, expressed                                 | 1.06  | down | 1.18 | down | 2.53  | up   | 1.21 | up   | 1.34  | up   | 1.49 | up   | ABA |
| Os.18122.1.S1_at   | LOC_Os03g07790 | zinc finger, C3HC4 type domain containing protein, expressed                        | 1.14  | down | 1.18 | up   | 2.14  | down | 1.06 | down | 1.25  | down | 1.44 | down | ABA |
| Os.1814.1.S1_a_at  | LOC_Os05g06670 | gibberellin 2-oxidase, putative, expressed                                          | 4.39  | up   | 2.10 | down | 2.82  | down | 6.74 | up   | 1.86  | down | 1.42 | up   | 4   |
| Os.18157.1.S2_at   | LOC_Os01g18360 | OslIAA4 - Auxin-responsive Aux/IAA gene family member, expressed                    | 1.01  | down | 1.00 | up   | 2.54  | up   | 1.01 | up   | 1.13  | up   | 1.02 | up   | ABA |
| Os.18169.1.S1_at   | LOC_Os01g18360 | OslIAA4 - Auxin-responsive Aux/IAA gene family member, expressed                    | 9.29  | up   | 1.13 | down | 1.01  | down | 1.05 | up   | 1.11  | up   | 1.49 | up   | IAA |
| Os.18169.2.S1_at   | LOC_Os01g18360 | OslIAA4 - Auxin-responsive Aux                                                      | 46.49 | up   | 1.00 | up   | 1.01  | down | 1.00 | up   | 1.00  | down | 1.01 | up   | IAA |
| Os.18169.2.S1_x_at | LOC_Os01g18360 | OslIAA4 - Auxin-responsive Aux/IAA gene family member, expressed                    | 28.09 | up   | 1.38 | down | 1.09  | up   | 1.00 | up   | 1.03  | up   | 1.01 | up   | IAA |
| Os.18177.1.S1_at   | LOC_Os11g04104 | major facilitator superfamily antiporter, putative, expressed                       | 1.07  | up   | 1.30 | down | 3.79  | up   | 1.12 | up   | 4.68  | up   | 3.00 | up   | 3   |
| Os.18196.1.S1_at   | LOC_Os07g42700 | paramyosin, putative, expressed                                                     | 1.11  | down | 1.18 | down | 2.18  | up   | 1.29 | down | 1.16  | up   | 1.19 | down | ABA |
| Os.18229.1.S1_at   | LOC_Os01g72610 | glycosyltransferase, putative, expressed                                            | 1.01  | up   | 1.59 | down | 2.64  | up   | 1.36 | up   | 1.90  | up   | 1.58 | up   | ABA |
| Os.18235.1.S1_at   | LOC_Os04g37550 | aspartic proteinase nepenthesin-2 precursor, putative, expressed                    | 1.14  | up   | 1.14 | up   | 2.01  | up   | 1.43 | down | 1.00  | down | 1.35 | down | ABA |
| Os.18241.2.A1_x_at | LOC_Os05g44570 | histidine-containing phosphotransfer protein, putative, expressed                   | 1.19  | up   | 1.05 | up   | 7.61  | up   | 1.05 | up   | 1.16  | up   | 1.15 | up   | ABA |
| Os.18257.1.S1_at   | LOC_Os07g10840 | uncharacterized glycosyltransferase, putative, expressed                            | 1.01  | down | 1.08 | up   | 7.10  | up   | 1.09 | down | 1.92  | up   | 1.13 | down | ABA |
| Os.18267.1.S1_at   | LOC_Os08g05630 | expressed protein                                                                   | 1.11  | up   | 1.04 | up   | 2.31  | up   | 1.14 | down | 1.04  | up   | 1.09 | down | ABA |
| Os.18296.1.S1_x_at | LOC_Os01g10440 | xylosyltransferase, putative, expressed                                             | 1.38  | up   | 1.18 | up   | 7.06  | up   | 1.36 | up   | 5.38  | up   | 1.21 | up   | 2   |
| Os.18299.1.S1_at   | LOC_Os07g07410 | oxidoreductase, 2OG-Fe oxygenase family protein, putative, expressed                | 1.27  | up   | 1.07 | down | 3.65  | up   | 1.03 | up   | 1.68  | up   | 1.24 | up   | ABA |
| Os.18302.1.S1_at   | LOC_Os01g06920 | resistance protein SlVE1 precursor, putative, expressed                             | 1.00  | down | 1.00 | up   | 5.59  | up   | 1.01 | down | 1.01  | down | 1.02 | up   | ABA |
| Os.18305.1.S1_at   | LOC_Os05g50550 | polyprenyl synthetase, putative, expressed                                          | 1.23  | up   | 1.02 | down | 2.15  | down | 1.05 | down | 1.13  | down | 1.13 | up   | ABA |
| Os.18305.1.S2_at   | LOC_Os05g50550 | polyprenyl synthetase, putative, expressed                                          | 1.19  | up   | 1.05 | up   | 2.13  | down | 1.02 | up   | 1.12  | down | 1.04 | up   | ABA |
| Os.18307.1.S1_at   | LOC_Os07g38950 | expressed protein                                                                   | 1.22  | up   | 1.12 | up   | 2.60  | down | 1.22 | down | 1.47  | down | 1.13 | down | ABA |
| Os.18318.1.S1_at   | LOC_Os03g10240 | DUF677 domain containing protein, putative, expressed                               | 1.09  | up   | 1.13 | up   | 2.20  | up   | 1.15 | up   | 1.31  | down | 1.07 | up   | ABA |
| Os.18323.1.S1_at   | LOC_Os04g52590 | protein kinase domain containing protein, expressed                                 | 1.15  | down | 1.18 | down | 1.32  | down | 1.79 | up   | 1.14  | down | 8.77 | up   | JA  |
| Os.18349.1.A1_s_at | LOC_Os11g08090 | expressed protein                                                                   | 1.14  | down | 1.06 | down | 2.32  | down | 1.05 | down | 1.33  | down | 1.22 | down | ABA |
| Os.18355.1.A1_at   | C99457         | ---                                                                                 | 1.44  | up   | 1.06 | up   | 2.03  | down | 1.12 | up   | 1.11  | up   | 1.47 | down | ABA |
| Os.18364.1.S1_at   | LOC_Os04g48760 | leucine-rich repeat family protein, putative, expressed                             | 1.54  | up   | 1.34 | down | 2.01  | down | 1.10 | up   | 1.61  | down | 1.08 | down | ABA |
| Os.18374.1.A1_at   | CT835882       | Oryza sativa (indica cultivar-group) cDNA clone:OSIGCSA026A15, full insert sequence | 1.15  | up   | 1.55 | down | 5.66  | up   | 1.13 | down | 1.35  | up   | 1.08 | down | ABA |
| Os.18376.1.S1_at   | LOC_Os11g29780 | plant-specific domain TIGR01627 family protein, expressed                           | 1.15  | down | 1.13 | down | 32.66 | up   | 1.02 | up   | 1.04  | down | 1.01 | up   | ABA |
| Os.18381.1.S1_at   | LOC_Os04g19740 | transketolase, chloroplast precursor, putative, expressed                           | 1.03  | down | 1.20 | down | 28.81 | up   | 1.21 | down | 1.18  | up   | 1.14 | up   | ABA |
| Os.18383.1.A1_at   | LOC_Os08g37115 | expressed protein                                                                   | 1.08  | up   | 1.54 | down | 6.21  | up   | 1.56 | down | 1.07  | down | 1.72 | down | ABA |
| Os.18383.1.A1_x_at | LOC_Os08g37115 | expressed protein                                                                   | 1.25  | up   | 1.17 | down | 4.28  | up   | 1.09 | down | 1.12  | up   | 1.40 | down | ABA |
| Os.18395.1.S1_s_at | LOC_Os06g15620 | GASR7 - Gibberellin-regulated GASA/GAST/Snakin family protein precursor, expressed  | 1.33  | up   | 1.01 | down | 8.15  | down | 1.43 | up   | 1.04  | down | 1.27 | down | ABA |
| Os.18397.1.S1_at   | LOC_Os02g46640 | heat shock protein DnaJ, putative, expressed                                        | 1.06  | down | 1.01 | up   | 2.19  | up   | 1.08 | down | 1.10  | up   | 1.00 | down | ABA |
| Os.18406.1.S1_at   | LOC_Os07g40220 | expressed protein                                                                   | 1.07  | up   | 1.39 | down | 2.01  | up   | 1.46 | down | 1.51  | up   | 2.18 | down | 2   |
| Os.18418.1.S1_at   | LOC_Os07g06600 | glutaredoxin, putative, expressed                                                   | 1.14  | down | 1.23 | down | 2.01  | up   | 1.08 | up   | 1.15  | up   | 1.08 | up   | ABA |
| Os.18419.1.S1_at   | LOC_Os03g63450 | snRK1-interacting protein 1, putative, expressed                                    | 1.10  | down | 1.06 | up   | 1.36  | down | 1.01 | down | 1.09  | down | 2.10 | up   | JA  |
| Os.18421.1.S1_a_at | LOC_Os03g01800 | glycosyl hydrolases family 16, putative, expressed                                  | 1.06  | up   | 1.04 | down | 21.11 | down | 1.30 | up   | 1.71  | down | 1.07 | up   | ABA |
| Os.18430.1.S1_at   | LOC_Os04g35380 | expressed protein                                                                   | 1.02  | down | 1.00 | up   | 2.79  | up   | 1.07 | up   | 1.41  | up   | 1.03 | up   | ABA |
| Os.18458.1.S1_at   | LOC_Os01g57150 | SR protein related family member, putative, expressed                               | 1.21  | up   | 1.47 | up   | 2.33  | down | 1.24 | down | 1.62  | down | 1.43 | down | ABA |

|                    |                |                                                                                         |      |      |      |      |        |      |      |      |      |      |       |      |     |
|--------------------|----------------|-----------------------------------------------------------------------------------------|------|------|------|------|--------|------|------|------|------|------|-------|------|-----|
| Os.18486.1.S1_at   | LOC_Os09g32670 | UDP-glucuronate 4-epimerase, putative, expressed                                        | 1.37 | down | 1.14 | down | 3.40   | down | 1.07 | down | 1.19 | up   | 1.11  | up   | ABA |
| Os.1849.1.S1_at    | LOC_Os01g02390 | protein kinase domain containing protein, expressed                                     | 1.41 | up   | 1.28 | down | 3.73   | up   | 1.02 | up   | 2.14 | up   | 1.28  | up   | 2   |
| Os.18490.1.S1_x_at | LOC_Os03g47610 | thiamine biosynthesis protein thiC, putative, expressed                                 | 1.74 | up   | 1.07 | up   | 2.75   | down | 1.22 | down | 1.23 | down | 1.48  | down | ABA |
| Os.18490.3.S1_at   | LOC_Os03g47610 | thiamine biosynthesis protein thiC, putative, expressed                                 | 1.46 | up   | 1.26 | up   | 2.20   | down | 1.15 | down | 1.35 | down | 1.41  | down | ABA |
| Os.18493.1.S1_at   | LOC_Os09g37480 | OsSAUR53 - Auxin-responsive SAUR gene family member, expressed                          | 1.65 | up   | 1.13 | down | 3.19   | down | 1.10 | down | 1.24 | up   | 1.68  | down | ABA |
| Os.18513.1.S1_at   | LOC_Os05g32820 | peptide-N4-asparagine amidase A, putative, expressed                                    | 1.14 | down | 1.00 | up   | 4.09   | down | 1.64 | down | 1.43 | down | 1.10  | down | ABA |
| Os.1852.1.S1_at    | LOC_Os09g23150 | monoglyceride lipase, putative, expressed                                               | 1.22 | down | 1.23 | down | 3.65   | up   | 1.26 | up   | 1.57 | up   | 1.19  | up   | ABA |
| Os.18552.1.S1_at   | LOC_Os11g31980 | OsSCP63 - Putative Serine Carboxypeptidase homologue, expressed                         | 1.14 | down | 1.33 | down | 3.24   | down | 1.15 | down | 1.06 | up   | 1.60  | down | ABA |
| Os.18556.1.S1_x_at | LOC_Os03g64030 | receptor protein kinase, putative, expressed                                            | 1.00 | down | 1.00 | down | 2.93   | down | 1.10 | down | 1.65 | down | 1.28  | down | ABA |
| Os.18566.1.S1_at   | LOC_Os01g37490 | dynein light chain type 1 domain containing protein, expressed                          | 1.23 | down | 1.15 | down | 3.10   | down | 1.07 | down | 1.78 | down | 1.67  | down | ABA |
| Os.18572.1.S1_at   | LOC_Os04g52310 | metal cation transporter, putative, expressed                                           | 1.07 | down | 1.82 | down | 32.56  | down | 1.88 | down | 1.17 | up   | 1.42  | up   | ABA |
| Os.18573.1.S1_at   | LOC_Os07g43390 | 4-alpha-glucanotransferase, chloroplast precursor, putative, expressed                  | 1.23 | up   | 1.13 | up   | 2.41   | up   | 1.28 | up   | 1.10 | up   | 1.15  | up   | ABA |
| Os.18583.1.S1_at   | LOC_Os01g07260 | expressed protein                                                                       | 1.45 | down | 1.08 | down | 4.40   | down | 1.03 | down | 1.72 | down | 1.65  | down | ABA |
| Os.18583.2.S1_at   | LOC_Os01g07260 | expressed protein                                                                       | 1.42 | down | 1.09 | down | 9.15   | down | 1.14 | down | 2.31 | down | 1.68  | down | 2   |
| Os.18583.2.S1_x_at | LOC_Os01g07260 | expressed protein                                                                       | 1.18 | down | 1.09 | down | 4.51   | down | 1.04 | up   | 1.60 | down | 1.18  | down | ABA |
| Os.18587.1.S1_at   | LOC_Os07g08140 | heat stress transcription factor, putative, expressed                                   | 1.09 | down | 1.14 | down | 2.26   | up   | 1.91 | down | 1.28 | down | 1.35  | down | ABA |
| Os.18595.1.A1_at   | LOC_Os07g48450 | no apical meristem protein, putative, expressed                                         | 1.53 | down | 1.38 | down | 5.61   | up   | 2.05 | up   | 1.15 | up   | 1.02  | up   | 2   |
| Os.18597.1.S1_at   | LOC_Os03g09930 | sulfate transporter, putative, expressed                                                | 1.43 | up   | 1.17 | up   | 1.75   | up   | 2.04 | down | 1.13 | down | 1.70  | down | ACC |
| Os.18598.1.S1_at   | LOC_Os03g49260 | lipoxigenase, putative, expressed                                                       | 1.83 | down | 1.04 | down | 15.66  | down | 1.39 | up   | 4.49 | down | 1.37  | up   | 2   |
| Os.18599.1.S1_at   | LOC_Os03g57970 | LTPL73 - Protease inhibitor/seed storage/LTP family protein precursor, expressed        | 1.05 | up   | 1.20 | up   | 2.11   | up   | 1.49 | down | 1.08 | up   | 1.14  | down | ABA |
| Os.18612.1.S1_s_at | LOC_Os04g36050 | cleft lip and palate transmembrane protein 1, putative, expressed                       | 1.15 | up   | 1.12 | up   | 2.38   | down | 1.09 | down | 1.58 | down | 1.19  | down | ABA |
| Os.18612.1.S1_x_at | LOC_Os04g36050 | cleft lip and palate transmembrane protein 1, putative, expressed                       | 1.06 | up   | 1.08 | up   | 2.10   | down | 1.00 | down | 1.42 | down | 1.04  | down | ABA |
| Os.18615.1.S1_at   | LOC_Os03g41390 | ZOS3-15 - C2H2 zinc finger protein, expressed                                           | 1.27 | up   | 1.04 | down | 4.08   | up   | 1.10 | up   | 1.26 | down | 1.45  | down | ABA |
| Os.18615.1.S1_x_at | LOC_Os03g41390 | ZOS3-15 - C2H2 zinc finger protein, expressed                                           | 1.20 | up   | 1.06 | down | 4.76   | up   | 1.24 | up   | 1.08 | down | 1.17  | down | ABA |
| Os.18623.1.S1_at   | LOC_Os03g04530 | cytochrome P450, putative, expressed                                                    | 1.16 | down | 1.18 | down | 69.34  | down | 1.20 | down | 1.63 | down | 1.08  | down | ABA |
| Os.18627.1.S1_at   | LOC_Os03g53950 | strictosidine synthase, putative, expressed                                             | 1.02 | up   | 1.05 | up   | 2.45   | down | 1.15 | down | 1.34 | down | 1.18  | up   | ABA |
| Os.18633.1.S1_at   | LOC_Os04g43710 | CAMK_CAMK_like.3 - CAMK includes calcium/calmodulin dependent protein kinases, ex       | 1.07 | up   | 1.84 | down | 3.63   | up   | 1.07 | down | 1.17 | down | 2.43  | down | 2   |
| Os.18648.1.S1_at   | AK108823       | Oryza sativa (japonica cultivar-group) Os07g0142300 (Os07g0142300) mRNA, comple         | 1.03 | down | 1.03 | up   | 2.93   | up   | 1.24 | down | 1.17 | up   | 1.25  | down | ABA |
| Os.18653.1.S1_at   | LOC_Os03g24844 | expressed protein                                                                       | 1.21 | up   | 1.20 | up   | 2.19   | down | 1.09 | down | 1.43 | down | 1.39  | down | ABA |
| Os.18654.1.S1_x_at | LOC_Os08g36630 | bifunctional monodehydroascorbate reductase and carbonic anhydrase/nectarin-3 precu     | 1.26 | down | 1.60 | up   | 2.74   | up   | 1.18 | up   | 1.17 | down | 1.79  | up   | ABA |
| Os.18664.1.S1_a_at | LOC_Os01g71810 | glycosyl hydrolases family 17, putative, expressed                                      | 1.57 | down | 1.23 | up   | 8.29   | up   | 1.42 | up   | 1.42 | up   | 2.68  | up   | 2   |
| Os.18664.1.S1_x_at | LOC_Os01g71820 | glycosyl hydrolases family 17, putative, expressed                                      | 1.17 | down | 1.45 | up   | 10.09  | up   | 1.62 | up   | 1.50 | up   | 2.66  | up   | 2   |
| Os.18664.2.S1_x_at | LOC_Os01g71810 | glycosyl hydrolases family 17, putative, expressed                                      | 1.03 | up   | 1.48 | up   | 4.49   | up   | 1.63 | up   | 1.66 | up   | 2.97  | up   | 2   |
| Os.18692.1.S1_at   | LOC_Os02g43290 | protein kinase domain containing protein, expressed                                     | 2.18 | down | 1.34 | down | 3.80   | down | 1.17 | up   | 1.19 | down | 1.33  | up   | 2   |
| Os.18712.1.S1_at   | LOC_Os08g40940 | expressed protein                                                                       | 1.36 | up   | 2.04 | down | 7.63   | down | 1.01 | up   | 2.22 | up   | 2.95  | up   | 4   |
| Os.18714.1.S1_a_at | LOC_Os10g14920 | integral membrane protein DUF6 containing protein, expressed                            | 1.16 | up   | 1.15 | down | 2.71   | down | 1.05 | up   | 1.47 | down | 1.93  | down | ABA |
| Os.18718.1.S1_at   | LOC_Os05g32530 | mannosylglycoprotein endo-beta-mannosidase, putative, expressed                         | 1.08 | down | 1.11 | up   | 2.78   | up   | 1.02 | down | 1.13 | down | 1.17  | down | ABA |
| Os.18723.1.S1_at   | LOC_Os08g37210 | patatin, putative, expressed                                                            | 1.72 | down | 1.29 | down | 2.06   | up   | 2.49 | up   | 2.03 | up   | 40.46 | up   | 4   |
| Os.18724.1.S1_a_at | LOC_Os01g54620 | CESA4 - cellulose synthase, expressed                                                   | 1.12 | up   | 1.06 | up   | 3.59   | down | 1.33 | down | 2.28 | down | 1.10  | up   | 2   |
| Os.18724.1.S1_at   | LOC_Os01g54620 | CESA4 - cellulose synthase, expressed                                                   | 1.08 | up   | 1.05 | up   | 3.72   | down | 1.31 | down | 2.09 | down | 1.06  | down | 2   |
| Os.18724.2.S1_x_at | LOC_Os01g54620 | CESA4 - cellulose synthase, expressed                                                   | 1.10 | up   | 1.14 | up   | 3.29   | down | 1.38 | down | 2.32 | down | 1.09  | up   | 2   |
| Os.18725.1.S1_at   | LOC_Os03g56090 | MYB family transcription factor, putative, expressed                                    | 1.48 | up   | 1.53 | up   | 3.04   | up   | 1.46 | down | 3.39 | up   | 1.34  | down | 2   |
| Os.18734.1.S1_at   | LOC_Os03g01700 | expressed protein                                                                       | 1.51 | down | 3.53 | down | 155.65 | down | 1.10 | up   | 3.79 | down | 1.06  | down | 3   |
| Os.18736.1.S1_at   | LOC_Os01g70200 | exostosin family domain containing protein, expressed                                   | 1.08 | up   | 1.06 | down | 2.94   | down | 1.32 | down | 1.74 | down | 1.20  | up   | ABA |
| Os.18742.1.A1_at   | LOC_Os05g30010 | WD domain, G-beta repeat domain containing protein, expressed                           | 1.72 | down | 1.36 | down | 3.14   | down | 1.08 | down | 1.43 | down | 1.15  | down | ABA |
| Os.18744.1.S1_at   | LOC_Os01g59570 | senescence-induced receptor-like serine/threonine-protein kinase precursor, putative, e | 1.38 | down | 1.30 | up   | 7.76   | down | 1.30 | up   | 1.57 | down | 4.24  | down | 2   |
| Os.1880.1.A1_at    | AK068081       | Yippee-like protein                                                                     | 1.00 | up   | 1.63 | up   | 3.24   | up   | 1.12 | up   | 1.27 | up   | 1.08  | down | ABA |
| Os.18818.1.S1_a_at | LOC_Os01g12710 | oxidoreductase, short chain dehydrogenase/reductase family domain containing protei     | 1.40 | up   | 1.12 | up   | 9.86   | up   | 1.12 | down | 1.07 | up   | 1.09  | up   | ABA |
| Os.18819.1.S1_at   | LOC_Os05g06660 | OsSCP26 - Putative Serine Carboxypeptidase homologue, expressed                         | 1.08 | up   | 1.06 | up   | 3.34   | down | 1.18 | down | 1.78 | down | 1.34  | down | ABA |
| Os.18826.1.S1_at   | LOC_Os03g15850 | josephin, putative, expressed                                                           | 1.18 | up   | 1.03 | down | 2.75   | up   | 1.01 | down | 1.26 | up   | 1.20  | down | ABA |
| Os.18830.1.S1_at   | LOC_Os03g44150 | aminotransferase, putative, expressed                                                   | 1.18 | down | 1.29 | down | 3.38   | up   | 1.26 | up   | 1.93 | down | 1.43  | up   | ABA |
| Os.18830.1.S2_at   | LOC_Os03g44150 | aminotransferase, putative, expressed                                                   | 1.03 | up   | 1.10 | down | 2.87   | up   | 1.30 | up   | 1.81 | up   | 1.31  | up   | ABA |
| Os.18847.1.S1_at   | LOC_Os01g63180 | laccase-6 precursor, putative, expressed                                                | 2.52 | down | 1.54 | down | 6.10   | down | 1.09 | up   | 2.46 | down | 3.00  | down | 4   |
| Os.18861.1.S1_a_at | LOC_Os06g35910 | FYVE zinc finger domain containing protein, expressed                                   | 1.09 | up   | 1.28 | down | 2.51   | up   | 1.08 | up   | 1.25 | up   | 1.14  | up   | ABA |
| Os.18879.1.S1_at   | LOC_Os12g37840 | boron transporter protein, putative, expressed                                          | 1.24 | up   | 1.06 | down | 1.42   | up   | 1.10 | up   | 2.46 | up   | 1.08  | up   | SA  |



|                    |                |                                                                                  |      |      |      |      |       |      |      |      |        |      |      |      |     |
|--------------------|----------------|----------------------------------------------------------------------------------|------|------|------|------|-------|------|------|------|--------|------|------|------|-----|
| Os.18879.1.S2_at   | LOC_Os12g37840 | boron transporter protein, putative, expressed                                   | 1.07 | down | 1.21 | down | 1.50  | up   | 1.11 | up   | 2.29   | up   | 1.03 | down | SA  |
| Os.18881.1.S1_at   | LOC_Os05g37700 | periplasmic beta-glucosidase precursor, putative, expressed                      | 1.09 | up   | 1.34 | down | 5.52  | up   | 1.36 | down | 1.85   | up   | 1.69 | up   | ABA |
| Os.18919.1.A1_at   | LOC_Os03g49620 | BRASSINOSTEROID INSENSITIVE 1-associated receptor kinase 1 precursor, putative   | 1.02 | down | 1.11 | down | 3.62  | down | 1.07 | up   | 1.11   | down | 1.00 | up   | ABA |
| Os.18922.2.S1_at   | LOC_Os01g72530 | OsCML31 - Calmodulin-related calcium sensor protein, expressed                   | 1.84 | up   | 1.15 | up   | 1.95  | up   | 1.20 | down | 2.84   | up   | 1.11 | down | SA  |
| Os.18927.1.S1_at   | LOC_Os05g25450 | TKL_IRAK_CrRLK1L-1.3 - The CrRLK1L-1 subfamily has homology to the CrRLK1L ho    | 1.22 | up   | 1.15 | down | 2.18  | down | 1.12 | up   | 1.08   | up   | 1.26 | up   | ABA |
| Os.18933.1.S1_at   | LOC_Os02g12680 | cytochrome P450, putative, expressed                                             | 1.13 | down | 1.12 | down | 65.05 | up   | 3.71 | up   | 2.98   | up   | 4.16 | up   | 4   |
| Os.18941.1.S1_at   | LOC_Os07g03050 | expressed protein                                                                | 1.53 | up   | 1.29 | up   | 2.76  | up   | 1.04 | up   | 1.14   | up   | 1.04 | down | ABA |
| Os.18946.1.S1_at   | LOC_Os06g06050 | OsFBL27 - F-box domain and LRR containing protein, expressed                     | 1.06 | up   | 1.39 | up   | 6.55  | up   | 1.04 | up   | 1.03   | down | 1.23 | up   | ABA |
| Os.18946.2.S1_at   | AK107102       | F-box family protein                                                             | 1.14 | down | 1.17 | up   | 2.86  | up   | 1.01 | down | 1.10   | up   | 1.08 | up   | ABA |
| Os.18948.1.S1_at   | LOC_Os02g04840 | GHMP kinases ATP-binding protein, putative, expressed                            | 1.05 | up   | 1.06 | down | 4.96  | up   | 1.14 | down | 1.34   | up   | 1.47 | down | ABA |
| Os.18954.1.S1_at   | LOC_Os04g48230 | dehydration response related protein, putative, expressed                        | 1.10 | down | 1.10 | down | 2.01  | down | 1.15 | down | 1.39   | down | 1.05 | up   | ABA |
| Os.18955.1.S1_at   | LOC_Os06g51260 | MYB family transcription factor, putative, expressed                             | 1.40 | down | 1.28 | down | 3.33  | up   | 1.11 | down | 1.03   | down | 1.27 | down | ABA |
| Os.19003.1.S1_a_at | LOC_Os01g21160 | 2-oxo acid dehydrogenases acyltransferase domain containing protein, expressed   | 1.11 | up   | 1.01 | down | 3.44  | up   | 1.68 | up   | 2.38   | up   | 3.92 | up   | 3   |
| Os.19019.1.S1_a_at | LOC_Os08g02850 | zinc finger family protein, putative, expressed                                  | 1.11 | up   | 1.17 | down | 2.40  | up   | 1.12 | up   | 1.04   | up   | 1.33 | up   | ABA |
| Os.19021.1.S1_at   | LOC_Os06g34040 | DJ-1 family protein, putative, expressed                                         | 1.13 | up   | 1.12 | up   | 2.28  | up   | 1.00 | up   | 1.06   | down | 1.06 | up   | ABA |
| Os.19026.1.S1_at   | LOC_Os07g08210 | cytidyltransferase domain containing protein, expressed                          | 1.43 | up   | 1.02 | up   | 3.31  | up   | 1.16 | down | 1.35   | up   | 1.10 | up   | ABA |
| Os.19034.1.S1_at   | LOC_Os05g51620 | expressed protein                                                                | 1.03 | down | 1.18 | down | 3.95  | down | 1.24 | down | 1.19   | down | 1.25 | down | ABA |
| Os.19044.1.S1_at   | LOC_Os10g04520 | expressed protein                                                                | 1.02 | up   | 1.48 | down | 2.46  | up   | 1.04 | up   | 1.47   | up   | 1.15 | up   | ABA |
| Os.19070.1.S1_at   | LOC_Os11g09020 | amino acid transporter, putative, expressed                                      | 1.23 | down | 1.13 | down | 5.72  | up   | 1.07 | up   | 1.82   | up   | 1.08 | down | ABA |
| Os.19131.1.A1_at   | LOC_Os09g28910 | carbonic anhydrase, chloroplast precursor, putative, expressed                   | 1.03 | up   | 1.02 | down | 3.79  | up   | 1.03 | up   | 1.12   | up   | 1.29 | up   | ABA |
| Os.19134.1.S1_at   | LOC_Os07g29224 | expressed protein                                                                | 1.43 | up   | 1.04 | up   | 3.03  | up   | 1.01 | down | 1.25   | up   | 1.21 | up   | ABA |
| Os.19165.1.S1_at   | LOC_Os11g29900 | expressed protein                                                                | 1.02 | up   | 1.04 | down | 3.28  | up   | 1.25 | up   | 1.15   | up   | 1.38 | up   | ABA |
| Os.19187.1.S1_at   | LOC_Os02g10470 | EF hand family protein, putative, expressed                                      | 1.10 | down | 1.10 | down | 4.94  | up   | 1.16 | down | 1.12   | up   | 1.09 | up   | ABA |
| Os.19230.2.S1_at   | LOC_Os06g40050 | mitochondrial carrier protein, putative, expressed                               | 1.41 | up   | 1.09 | up   | 2.06  | up   | 1.31 | up   | 1.56   | up   | 1.28 | up   | ABA |
| Os.19307.1.S1_at   | LOC_Os08g03430 | extracellular ligand-gated ion channel, putative, expressed                      | 1.13 | up   | 1.05 | up   | 7.63  | up   | 1.06 | down | 1.11   | up   | 1.15 | up   | ABA |
| Os.19350.1.S1_at   | LOC_Os04g45290 | glycosyl hydrolases, putative, expressed                                         | 1.02 | up   | 1.11 | up   | 9.61  | down | 1.20 | up   | 1.58   | down | 1.26 | down | ABA |
| Os.19361.1.S1_at   | LOC_Os04g45290 | glycosyl hydrolases, putative, expressed                                         | 1.21 | up   | 1.25 | up   | 1.37  | up   | 1.15 | down | 1.13   | down | 3.10 | up   | JA  |
| Os.19361.1.S2_at   | LOC_Os04g45290 | glycosyl hydrolases, putative, expressed                                         | 1.22 | up   | 1.29 | up   | 1.43  | up   | 1.08 | down | 1.02   | up   | 2.29 | up   | JA  |
| Os.19366.1.S1_a_at | AK100298       | Oryza sativa Japonica Group cDNA clone:J023077J24, full insert sequence.         | 1.32 | down | 1.20 | down | 2.30  | up   | 1.17 | up   | 1.16   | up   | 1.01 | up   | ABA |
| Os.19366.1.S2_at   | AK100298       | Oryza sativa Japonica Group cDNA clone:J023077J24, full insert sequence.         | 1.17 | up   | 1.02 | up   | 2.12  | up   | 1.41 | down | 1.17   | down | 1.44 | down | ABA |
| Os.19366.4.A1_a_at | AK100298       | Oryza sativa Japonica Group cDNA clone:J023077J24, full insert sequence.         | 1.23 | down | 1.27 | down | 2.31  | up   | 1.06 | up   | 1.23   | up   | 1.11 | up   | ABA |
| Os.19375.1.S1_at   | LOC_Os08g34780 | adenyllyl cyclase-associated protein, putative, expressed                        | 1.18 | up   | 1.61 | up   | 2.53  | down | 1.62 | up   | 1.29   | down | 2.75 | up   | 2   |
| Os.19385.1.S1_at   | LOC_Os01g52730 | DUF584 domain containing protein, putative, expressed                            | 1.66 | up   | 1.04 | down | 28.93 | up   | 1.37 | up   | 1.99   | up   | 1.05 | down | ABA |
| Os.19465.1.S1_at   | NM_001060676   | Oryza sativa (japonica cultivar-group) Os04g0660100 (Os04g0660100) mRNA, comple  | 2.03 | up   | 1.06 | up   | 1.02  | down | 1.09 | up   | 1.18   | up   | 1.59 | up   | IAA |
| Os.19472.1.S1_at   | LOC_Os01g03330 | BBT13 - Bowman-Birk type bran trypsin inhibitor precursor, expressed             | 1.13 | down | 1.25 | up   | 3.42  | up   | 2.31 | up   | 2.30   | up   | 6.28 | up   | 4   |
| Os.19480.1.S1_at   | LOC_Os03g20870 | zinc finger, C3HC4 type domain containing protein, expressed                     | 1.36 | up   | 1.12 | down | 4.85  | up   | 1.35 | up   | 2.51   | up   | 1.17 | up   | 2   |
| Os.19493.1.S1_at   | LOC_Os08g01940 | non-lysosomal glucosylceramidase, putative, expressed                            | 1.60 | down | 1.33 | up   | 5.64  | down | 1.02 | down | 1.09   | down | 2.78 | up   | 2   |
| Os.19539.1.S1_at   | LOC_Os02g47560 | DNA-binding protein, putative, expressed                                         | 2.09 | up   | 1.09 | down | 2.45  | up   | 1.22 | up   | 2.00   | up   | 1.88 | up   | 3   |
| Os.19547.1.S1_at   | LOC_Os08g02030 | transferase family protein, putative, expressed                                  | 1.40 | up   | 1.25 | up   | 9.25  | up   | 1.15 | up   | 10.73  | up   | 1.19 | up   | 2   |
| Os.19553.1.S1_at   | LOC_Os05g49420 | transcription factor, putative, expressed                                        | 1.17 | down | 1.10 | down | 5.39  | up   | 1.46 | up   | 1.57   | up   | 2.43 | up   | 2   |
| Os.19586.1.S1_at   | LOC_Os12g12934 | peptide transporter PTR3-A, putative, expressed                                  | 2.74 | down | 1.28 | up   | 12.58 | down | 1.12 | down | 1.67   | down | 1.35 | down | 2   |
| Os.19593.1.S1_s_at | NM_001056753   | Oryza sativa (japonica cultivar-group) Os03g0375900 (Os03g0375900) mRNA, comple  | 1.57 | down | 1.10 | up   | 2.88  | down | 1.34 | up   | 1.24   | down | 2.28 | up   | 2   |
| Os.19608.1.S1_at   | LOC_Os09g38130 | auxin efflux carrier component, putative, expressed                              | 2.18 | up   | 1.57 | down | 3.49  | up   | 1.60 | up   | 2.48   | up   | 2.27 | up   | 4   |
| Os.19617.1.S1_at   | LOC_Os01g66760 | inactive receptor kinase At2g26730 precursor, putative, expressed                | 1.11 | down | 1.20 | up   | 1.89  | down | 1.77 | up   | 1.04   | down | 2.12 | up   | JA  |
| Os.19626.1.S1_at   | LOC_Os02g39600 | outer envelope protein, putative, expressed                                      | 1.28 | up   | 1.10 | up   | 2.58  | down | 1.20 | down | 1.42   | down | 1.47 | down | ABA |
| Os.19632.1.S1_at   | LOC_Os03g46470 | metal cation transporter, putative, expressed                                    | 1.59 | down | 2.97 | down | 7.24  | down | 1.33 | down | 1.24   | down | 1.01 | down | 2   |
| Os.19740.1.S2_at   | LOC_Os03g02874 | retrotransposon protein, putative, Ty3-gypsy subclass, expressed                 | 1.02 | down | 1.18 | down | 9.00  | up   | 2.79 | up   | 137.60 | up   | 1.81 | up   | 3   |
| Os.1977.1.S1_a_at  | LOC_Os01g02400 | protein kinase domain containing protein, expressed                              | 1.03 | up   | 1.39 | down | 2.15  | up   | 2.06 | down | 2.32   | up   | 1.02 | up   | 2   |
| Os.1977.3.S1_x_at  | LOC_Os01g02600 | Ser/Thr receptor-like kinase, putative, expressed                                | 1.22 | up   | 1.37 | down | 2.09  | up   | 1.12 | down | 1.77   | up   | 1.15 | up   | ABA |
| Os.19771.1.S1_at   | LOC_Os01g51360 | lipase, putative, expressed                                                      | 1.12 | down | 1.30 | up   | 3.79  | down | 1.24 | up   | 1.66   | down | 1.25 | down | ABA |
| Os.19851.1.S1_at   | LOC_Os03g13520 | endonuclease/exonuclease/phosphatase family domain containing protein, expressed | 1.57 | down | 1.28 | down | 5.19  | down | 1.08 | up   | 1.69   | down | 1.49 | down | ABA |
| Os.19863.1.S1_a_at | LOC_Os04g36560 | chloride channel protein, putative, expressed                                    | 2.26 | up   | 1.02 | down | 8.76  | up   | 1.13 | down | 1.83   | up   | 1.14 | up   | 2   |
| Os.19895.1.S1_at   | LOC_Os11g46860 | wall-associated receptor kinase-like 4 precursor, putative, expressed            | 2.03 | down | 1.18 | up   | 3.32  | down | 1.09 | up   | 2.02   | down | 1.14 | up   | 3   |
| Os.19951.1.A1_at   | AJ494928       | Oryza sativa Z226 snoRNA                                                         | 1.10 | up   | 1.83 | up   | 2.70  | down | 1.71 | up   | 3.30   | up   | 1.66 | up   | 2   |
| Os.19951.1.S1_at   | AJ494928       | Oryza sativa Z226 snoRNA.                                                        | 1.00 | up   | 1.16 | up   | 2.45  | down | 1.27 | up   | 1.88   | up   | 1.49 | up   | ABA |

|                    |                |                                                                                   |       |      |      |      |       |      |      |      |       |      |      |      |     |
|--------------------|----------------|-----------------------------------------------------------------------------------|-------|------|------|------|-------|------|------|------|-------|------|------|------|-----|
| Os.19951.1.S1_x_at | AJ494928       | Oryza sativa Z226 snoRNA.                                                         | 1.01  | up   | 1.16 | up   | 2.31  | down | 1.21 | up   | 1.95  | up   | 1.42 | up   | ABA |
| Os.19954.1.S1_at   | LOC_Os09g28690 | gibberellin receptor GID1L2, putative, expressed                                  | 2.02  | up   | 1.21 | up   | 1.70  | down | 1.09 | up   | 1.11  | up   | 1.27 | up   | IAA |
| Os.20001.1.S1_at   | LOC_Os04g32080 | 11-beta-hydroxysteroid dehydrogenase, putative, expressed                         | 1.00  | down | 1.02 | up   | 27.44 | up   | 1.02 | down | 1.02  | down | 1.01 | up   | ABA |
| Os.20067.1.S1_at   | LOC_Os04g38530 | aldose 1-epimerase, putative, expressed                                           | 1.20  | down | 1.04 | down | 2.47  | down | 1.16 | up   | 1.28  | down | 1.60 | down | ABA |
| Os.20079.1.S2_at   | LOC_Os11g25160 | tropinone reductase 2, putative, expressed                                        | 1.33  | down | 1.89 | down | 1.90  | up   | 1.17 | down | 1.30  | up   | 2.38 | down | JA  |
| Os.20120.1.S1_at   | LOC_Os01g18670 | MDR-like ABC transporter, putative, expressed                                     | 1.02  | down | 1.03 | down | 2.49  | down | 1.13 | up   | 1.07  | up   | 1.83 | up   | ABA |
| Os.20154.1.S1_at   | LOC_Os02g56700 | dehydrogenase, putative, expressed                                                | 10.92 | up   | 1.51 | down | 1.10  | up   | 1.07 | up   | 65.90 | up   | 1.28 | up   | 2   |
| Os.20163.1.S1_at   | LOC_Os03g02860 | heavy metal-associated domain containing protein, expressed                       | 1.06  | up   | 1.58 | down | 3.29  | down | 1.15 | down | 1.48  | down | 1.64 | down | ABA |
| Os.20169.1.S1_at   | LOC_Os06g34730 | expressed protein                                                                 | 1.66  | down | 2.01 | up   | 2.95  | down | 1.16 | down | 2.12  | down | 1.12 | down | 3   |
| Os.20175.1.A1_x_at | LOC_Os04g47780 | transmembrane amino acid transporter protein, putative, expressed                 | 1.69  | up   | 1.46 | up   | 1.92  | down | 2.64 | up   | 1.37  | down | 1.17 | down | ACC |
| Os.2019.1.S1_at    | LOC_Os01g50460 | nodulin MtN3 family protein, putative, expressed                                  | 1.73  | up   | 1.51 | down | 4.98  | down | 1.80 | up   | 2.80  | down | 2.27 | up   | 3   |
| Os.2019.2.S1_x_at  | LOC_Os01g50460 | nodulin MtN3 family protein, putative, expressed                                  | 1.84  | up   | 1.66 | down | 2.81  | down | 1.50 | up   | 1.66  | down | 1.50 | up   | ABA |
| Os.20203.1.S1_at   | LOC_Os01g10210 | lachrymatory factor synthase, putative, expressed                                 | 1.32  | down | 1.00 | up   | 7.32  | down | 1.29 | down | 1.31  | down | 3.24 | up   | 2   |
| Os.20203.1.S1_s_at | LOC_Os01g10210 | lachrymatory factor synthase, putative, expressed                                 | 1.37  | down | 1.06 | up   | 4.99  | down | 1.13 | down | 1.09  | down | 3.57 | up   | 2   |
| Os.20204.2.S1_a_at | LOC_Os02g12350 | histone deacetylase, putative, expressed                                          | 1.31  | down | 1.22 | down | 2.85  | up   | 1.48 | up   | 4.99  | up   | 1.82 | up   | 2   |
| Os.20206.1.S1_at   | LOC_Os02g41840 | DUF584 domain containing protein, putative, expressed                             | 1.50  | up   | 2.19 | up   | 17.72 | up   | 1.23 | up   | 1.20  | up   | 1.04 | up   | 2   |
| Os.20210.1.S1_at   | LOC_Os02g13890 | FYVE zinc finger domain containing protein, expressed                             | 1.26  | up   | 1.03 | up   | 2.01  | up   | 1.00 | down | 1.18  | up   | 1.02 | up   | ABA |
| Os.20211.1.S1_at   | LOC_Os10g36710 | CAMK_CAMK_like.40 - CAMK includes calcium/calmodulin dependent protein kinases, e | 2.01  | up   | 1.06 | down | 1.64  | up   | 1.01 | up   | 1.17  | up   | 1.08 | up   | IAA |
| Os.20221.1.S1_at   | LOC_Os09g21710 | AN1-like zinc finger domain containing protein, expressed                         | 3.77  | up   | 1.05 | up   | 1.89  | up   | 1.76 | down | 5.01  | up   | 1.70 | down | 2   |
| Os.20224.1.S1_at   | LOC_Os12g37690 | MYB family transcription factor, putative, expressed                              | 1.12  | up   | 1.15 | down | 3.56  | up   | 1.25 | down | 1.15  | up   | 3.32 | up   | 2   |
| Os.20230.1.S1_at   | LOC_Os11g37950 | WIP3 - Wound-induced protein precursor, expressed                                 | 1.21  | down | 2.70 | up   | 4.37  | up   | 1.04 | up   | 1.19  | up   | 1.12 | up   | 2   |
| Os.20234.2.S1_at   | LOC_Os11g14570 | expressed protein                                                                 | 1.07  | up   | 1.06 | down | 2.70  | down | 1.32 | down | 1.74  | down | 1.38 | down | ABA |
| Os.20237.1.S1_at   | LOC_Os09g04710 | GDSL-like lipase/acylhydrolase, putative, expressed                               | 1.18  | up   | 1.05 | down | 3.44  | down | 1.10 | down | 1.13  | down | 1.14 | down | ABA |
| Os.20246.1.S1_at   | LOC_Os10g32444 | expressed protein                                                                 | 1.06  | up   | 1.06 | up   | 2.99  | up   | 1.08 | down | 1.12  | up   | 1.15 | down | ABA |
| Os.20262.1.S1_at   | LOC_Os05g03174 | glycosyltransferase family 43 protein, putative, expressed                        | 1.12  | down | 1.20 | down | 2.98  | down | 1.19 | down | 1.48  | down | 1.62 | up   | ABA |
| Os.20283.1.S1_at   | LOC_Os04g49900 | ABC transporter family protein, putative, expressed                               | 1.77  | down | 2.94 | down | 12.73 | down | 1.19 | up   | 2.23  | down | 1.59 | up   | 3   |
| Os.20289.1.S1_at   | LOC_Os11g37960 | WIP4 - Wound-induced protein precursor, expressed                                 | 1.15  | down | 2.54 | up   | 1.59  | up   | 1.64 | up   | 1.11  | down | 1.32 | down | BAP |
| Os.20290.1.S1_at   | LOC_Os07g01410 | peroxidase precursor, putative, expressed                                         | 1.15  | down | 1.04 | down | 5.15  | down | 1.29 | up   | 2.46  | down | 3.34 | down | 3   |
| Os.20300.1.S1_at   | LOC_Os12g05180 | avr9/Cf-9 rapidly elicited protein, putative, expressed                           | 1.36  | up   | 1.04 | up   | 2.74  | up   | 1.05 | down | 1.07  | down | 1.36 | down | ABA |
| Os.20327.1.S1_at   | LOC_Os06g44080 | ubiquitin family protein, putative, expressed                                     | 1.28  | down | 1.10 | down | 2.64  | down | 1.03 | up   | 1.42  | down | 1.27 | down | ABA |
| Os.20341.1.S1_s_at | LOC_Os03g52040 | OsSCP19 - Putative Serine Carboxypeptidase homologue, expressed                   | 1.20  | down | 1.01 | down | 2.58  | down | 1.18 | down | 1.31  | down | 1.83 | up   | ABA |
| Os.20341.2.S1_at   | LOC_Os03g52040 | OsSCP19 - Putative Serine Carboxypeptidase homologue, expressed                   | 1.30  | down | 1.05 | down | 3.60  | down | 1.29 | down | 1.58  | down | 1.84 | up   | ABA |
| Os.20342.1.S1_at   | LOC_Os03g02710 | hydroxymethylglutaryl-CoA synthase, putative, expressed                           | 1.15  | down | 1.05 | up   | 5.12  | up   | 1.23 | down | 2.14  | up   | 1.83 | up   | 2   |
| Os.20354.1.S1_at   | LOC_Os03g45370 | sodium/calcium exchanger protein, putative, expressed                             | 1.08  | up   | 1.52 | down | 5.82  | up   | 1.63 | up   | 1.05  | up   | 1.25 | up   | ABA |
| Os.20355.1.S1_at   | LOC_Os01g72100 | OsCML10 - Calmodulin-related calcium sensor protein, expressed                    | 1.39  | up   | 1.00 | up   | 3.17  | down | 1.12 | up   | 1.33  | down | 1.34 | down | ABA |
| Os.20404.1.S1_at   | LOC_Os01g16146 | phenazine biosynthesis protein, putative, expressed                               | 2.09  | up   | 1.15 | down | 2.21  | up   | 1.12 | up   | 2.78  | up   | 1.91 | up   | 3   |
| Os.20408.1.S1_at   | LOC_Os04g44980 | short-chain dehydrogenase/reductase, putative, expressed                          | 1.77  | up   | 2.54 | up   | 1.42  | up   | 1.31 | down | 1.21  | up   | 2.10 | down | 2   |
| Os.20441.1.A1_at   | AK240960       | Oryza sativa Japonica Group cDNA, clone: J065045M09, full insert sequence.        | 1.23  | down | 2.07 | up   | 1.51  | down | 1.02 | up   | 1.43  | down | 1.42 | down | BAP |
| Os.20447.1.S1_at   | LOC_Os04g38620 | NAP domain containing protein, putative, expressed                                | 1.13  | up   | 1.25 | up   | 2.44  | down | 1.17 | up   | 1.08  | down | 1.07 | down | ABA |
| Os.20482.1.S1_at   | LOC_Os03g02550 | OsFBX76 - F-box domain containing protein, expressed                              | 1.45  | up   | 1.37 | down | 2.38  | down | 1.56 | down | 1.03  | up   | 2.00 | up   | ABA |
| Os.20501.1.S1_at   | LOC_Os07g47670 | hypoxia-responsive family protein, putative, expressed                            | 2.09  | up   | 1.05 | up   | 11.17 | up   | 2.49 | up   | 2.54  | up   | 1.58 | up   | 3   |
| Os.20504.1.A1_at   | LOC_Os12g12880 | expressed protein                                                                 | 1.11  | down | 1.55 | down | 2.88  | up   | 1.06 | up   | 1.07  | up   | 1.21 | up   | ABA |
| Os.20531.1.S1_at   | LOC_Os04g54010 | serine/threonine-protein kinase receptor precursor, putative, expressed           | 1.08  | down | 1.69 | down | 3.00  | up   | 1.42 | down | 1.53  | up   | 1.35 | down | ABA |
| Os.20548.1.S1_at   | AK066753       | expressed protein                                                                 | 1.45  | up   | 1.56 | up   | 1.23  | down | 1.44 | up   | 1.96  | up   | 5.48 | down | JA  |
| Os.20557.1.S1_s_at | LOC_Os11g10760 | NBS-LRR disease resistance protein, putative, expressed                           | 1.26  | up   | 1.27 | up   | 5.00  | up   | 1.08 | up   | 1.63  | up   | 1.01 | up   | ABA |
| Os.20570.1.S1_x_at | LOC_Os06g02500 | superoxide dismutase, chloroplast, putative, expressed                            | 1.10  | up   | 1.20 | up   | 3.33  | down | 1.07 | down | 1.71  | down | 1.33 | down | ABA |
| Os.20579.1.S1_at   | LOC_Os01g52750 | OsSub3 - Putative Subtilisin homologue, expressed                                 | 1.04  | down | 1.22 | down | 2.00  | up   | 1.03 | up   | 1.28  | down | 1.83 | down | ABA |
| Os.20617.1.S1_at   | LOC_Os07g46280 | Os7bglu26 - beta-mannosidase/glucosidase/exoglucanase, expressed                  | 2.08  | down | 1.07 | down | 5.45  | up   | 1.28 | down | 1.76  | up   | 1.40 | up   | 2   |
| Os.20617.2.S1_s_at | LOC_Os03g20710 | beta-glucosidase, putative                                                        | 1.44  | down | 1.07 | down | 5.63  | up   | 1.28 | down | 1.65  | up   | 1.55 | up   | ABA |
| Os.20617.2.S1_x_at | LOC_Os07g46280 | Os7bglu26 - beta-mannosidase/glucosidase/exoglucanase, expressed                  | 1.53  | down | 1.04 | down | 5.57  | up   | 1.36 | down | 1.65  | up   | 1.51 | up   | ABA |
| Os.20697.1.S1_at   | LOC_Os09g34070 | RNA recognition motif containing protein, expressed                               | 1.06  | up   | 1.04 | up   | 2.22  | up   | 1.02 | up   | 1.15  | up   | 1.10 | down | ABA |
| Os.20701.1.S1_at   | LOC_Os02g52560 | xyloglucan fucosyltransferase, putative, expressed                                | 1.03  | up   | 1.17 | down | 2.00  | up   | 1.07 | up   | 1.05  | up   | 1.19 | up   | ABA |
| Os.20712.2.A1_at   | LOC_Os01g54030 | NADP-dependent malic enzyme, putative, expressed                                  | 1.20  | down | 1.19 | down | 8.14  | up   | 1.15 | down | 1.15  | down | 1.09 | up   | ABA |
| Os.20717.1.S1_at   | LOC_Os01g61460 | leaf senescence related protein, putative, expressed                              | 2.10  | up   | 1.20 | down | 1.06  | up   | 1.28 | up   | 1.10  | up   | 1.61 | up   | IAA |
| Os.2075.1.S1_at    | LOC_Os01g19220 | beta-D-xylosidase, putative, expressed                                            | 1.43  | down | 1.10 | up   | 4.36  | down | 1.07 | down | 1.57  | down | 1.05 | down | ABA |

|                    |                |                                                                                       |      |      |      |      |        |      |      |      |      |      |      |      |     |
|--------------------|----------------|---------------------------------------------------------------------------------------|------|------|------|------|--------|------|------|------|------|------|------|------|-----|
| Os.20750.1.S1_at   | LOC_Os01g72970 | DUF630/DUF632 domains containing protein, putative, expressed                         | 1.09 | up   | 1.35 | up   | 3.03   | up   | 1.27 | up   | 2.55 | up   | 1.23 | down | 2   |
| Os.20755.1.S1_at   | LOC_Os04g42690 | UDP-glucuronosyl and UDP-glucosyl transferase domain containing protein, expressed    | 2.04 | down | 1.55 | down | 3.49   | down | 1.01 | up   | 1.23 | down | 1.84 | down | 2   |
| Os.20773.1.S1_at   | LOC_Os06g10280 | CDP-alcohol phosphatidyltransferase, putative, expressed                              | 1.06 | up   | 1.11 | down | 3.26   | up   | 1.27 | down | 1.28 | up   | 1.02 | up   | ABA |
| Os.20853.1.S1_at   | LOC_Os09g38920 | thiol protease SEN102 precursor, putative, expressed                                  | 1.20 | down | 1.13 | down | 2.52   | up   | 1.41 | up   | 1.35 | up   | 1.64 | up   | ABA |
| Os.20863.1.S1_at   | LOC_Os01g62970 | expressed protein                                                                     | 1.05 | down | 1.47 | up   | 8.57   | up   | 1.18 | down | 1.03 | up   | 1.55 | down | ABA |
| Os.20863.2.S1_x_at | LOC_Os01g62970 | expressed protein                                                                     | 1.14 | down | 1.18 | up   | 7.57   | up   | 1.05 | up   | 1.06 | down | 1.12 | down | ABA |
| Os.20884.1.S1_at   | LOC_Os05g01760 | lysine ketoglutarate reductase trans-splicing related 1, putative, expressed          | 1.05 | up   | 1.25 | down | 2.40   | up   | 1.09 | up   | 1.53 | up   | 1.48 | up   | ABA |
| Os.20885.1.S1_at   | LOC_Os03g08170 | protein kinase APK1B, chloroplast precursor, putative, expressed                      | 1.80 | down | 1.09 | down | 5.33   | down | 1.08 | down | 1.52 | down | 1.77 | down | ABA |
| Os.209.1.S1_at     | LOC_Os01g16920 | embryonic protein DC-8, putative, expressed                                           | 1.04 | up   | 1.03 | up   | 15.39  | up   | 1.04 | up   | 1.03 | up   | 1.01 | down | ABA |
| Os.20902.1.A1_at   | LOC_Os11g01010 | autophagy-related protein 8D, putative, expressed                                     | 1.15 | up   | 1.06 | down | 2.02   | up   | 1.02 | up   | 1.42 | up   | 1.07 | up   | ABA |
| Os.20931.1.S1_s_at | LOC_Os02g13300 | mitochondrial carrier protein, putative, expressed                                    | 1.15 | up   | 1.05 | down | 5.43   | up   | 1.04 | up   | 1.99 | up   | 1.69 | up   | ABA |
| Os.20934.1.A1_at   | LOC_Os03g07190 | expressed protein                                                                     | 1.01 | down | 1.01 | down | 2.54   | up   | 1.01 | down | 1.01 | down | 1.00 | up   | ABA |
| Os.20936.1.S1_a_at | LOC_Os07g05365 | photosystem II 10 kDa polypeptide, chloroplast precursor, putative, expressed         | 1.68 | down | 1.66 | down | 150.22 | up   | 4.53 | down | 7.43 | up   | 1.30 | down | 3   |
| Os.20973.1.S1_s_at | LOC_Os05g44760 | hexokinase, putative, expressed                                                       | 1.27 | down | 1.03 | up   | 2.15   | down | 1.03 | down | 1.33 | down | 1.00 | down | ABA |
| Os.20980.1.S1_at   | LOC_Os01g56180 | expressed protein                                                                     | 1.29 | down | 1.00 | up   | 4.11   | up   | 1.08 | down | 1.14 | up   | 1.23 | up   | ABA |
| Os.20982.1.S1_at   | LOC_Os11g45400 | glycerol-3-phosphate acyltransferase, putative, expressed                             | 1.18 | down | 1.06 | down | 1.07   | up   | 1.34 | up   | 1.05 | up   | 3.75 | up   | JA  |
| Os.21044.1.S1_at   | LOC_Os07g29220 | Cyclopropane-fatty-acyl-phospholipid synthase, putative, expressed                    | 1.16 | down | 1.19 | up   | 2.45   | down | 1.10 | up   | 1.34 | down | 1.44 | up   | ABA |
| Os.21066.1.S1_at   | LOC_Os03g56250 | LRR receptor-like protein kinase, putative, expressed                                 | 1.49 | up   | 1.26 | down | 2.01   | up   | 1.27 | up   | 1.64 | up   | 1.31 | up   | ABA |
| Os.21108.1.S1_at   | LOC_Os05g50890 | OsGH3.5 - Probable indole-3-acetic acid-amido synthetase, expressed                   | 1.59 | up   | 1.01 | down | 3.58   | down | 1.14 | down | 1.06 | down | 1.76 | up   | ABA |
| Os.2117.1.S1_at    | LOC_Os01g33000 | expressed protein                                                                     | 1.05 | up   | 1.09 | down | 3.39   | up   | 1.03 | up   | 1.27 | up   | 1.18 | up   | ABA |
| Os.2117.1.S1_s_at  | LOC_Os01g33000 | expressed protein                                                                     | 1.17 | up   | 1.11 | up   | 2.70   | up   | 1.02 | up   | 1.14 | up   | 1.00 | up   | ABA |
| Os.2117.2.S1_x_at  | LOC_Os01g33000 | expressed protein                                                                     | 1.37 | up   | 1.05 | down | 3.75   | up   | 1.28 | down | 1.17 | up   | 1.05 | down | ABA |
| Os.21192.1.S1_at   | LOC_Os01g48820 | expressed protein                                                                     | 1.00 | up   | 1.01 | up   | 3.52   | up   | 1.01 | down | 1.01 | down | 1.00 | down | ABA |
| Os.21193.2.S1_x_at | LOC_Os10g27980 | transmembrane amino acid transporter protein, putative, expressed                     | 1.25 | down | 1.14 | down | 2.95   | down | 1.43 | down | 1.56 | down | 2.49 | up   | 2   |
| Os.2123.1.S1_at    | LOC_Os01g54300 | OsMan02 - Endo-Beta-Mannanase                                                         | 1.15 | up   | 1.03 | down | 4.10   | down | 1.22 | down | 1.91 | down | 1.53 | up   | ABA |
| Os.21230.1.S1_at   | LOC_Os12g07190 | CBS domain-containing protein, putative, expressed                                    | 1.27 | up   | 1.11 | up   | 3.25   | down | 1.19 | down | 1.30 | down | 1.03 | up   | ABA |
| Os.21243.1.S1_at   | LOC_Os02g36490 | expressed protein                                                                     | 1.05 | up   | 1.12 | down | 2.66   | up   | 1.25 | down | 1.28 | down | 1.10 | down | ABA |
| Os.21280.1.S1_at   | LOC_Os12g25490 | O-methyltransferase, putative, expressed                                              | 1.48 | down | 1.51 | down | 2.55   | down | 1.05 | down | 1.74 | down | 7.23 | up   | 2   |
| Os.21282.1.S1_at   | LOC_Os03g13600 | ZOS3-07 - C2H2 zinc finger protein, expressed                                         | 1.20 | down | 1.09 | up   | 2.47   | down | 1.05 | down | 1.04 | up   | 1.34 | down | ABA |
| Os.21289.1.S1_at   | LOC_Os11g05540 | rhoGAP domain containing protein, expressed                                           | 1.28 | down | 1.00 | down | 3.03   | down | 1.18 | down | 1.42 | down | 1.57 | down | ABA |
| Os.21323.1.S1_at   | LOC_Os04g38885 | expressed protein                                                                     | 2.08 | up   | 1.00 | up   | 4.83   | up   | 1.11 | up   | 1.09 | up   | 1.26 | up   | 2   |
| Os.21380.1.S1_at   | AK120358       | Oryza sativa Japonica Group cDNA clone:J013067F13, full insert sequence.              | 1.03 | up   | 1.08 | up   | 3.68   | up   | 1.15 | down | 1.19 | down | 1.13 | down | ABA |
| Os.21410.1.S1_at   | LOC_Os07g46780 | tyrosine-specific transport protein, putative, expressed                              | 1.98 | up   | 1.24 | up   | 4.11   | down | 2.07 | down | 1.88 | down | 1.81 | down | 3   |
| Os.21442.1.S1_at   | LOC_Os02g03960 | CPuORF1 - conserved peptide uORF-containing transcript, expressed                     | 1.44 | down | 1.07 | down | 2.01   | down | 1.19 | up   | 1.11 | down | 1.30 | down | ABA |
| Os.21442.1.S1_x_at | LOC_Os02g03960 | CPuORF1 - conserved peptide uORF-containing transcript, expressed                     | 1.35 | down | 1.03 | down | 2.23   | down | 1.11 | up   | 1.17 | down | 1.34 | down | ABA |
| Os.21454.1.S1_at   | LOC_Os02g04810 | auxin response factor 5, putative, expressed                                          | 1.53 | up   | 1.34 | down | 2.63   | up   | 1.71 | up   | 1.50 | up   | 1.91 | down | ABA |
| Os.21461.1.S1_at   | LOC_Os03g15430 | Ser/Thr protein phosphatase family protein, putative, expressed                       | 1.06 | up   | 1.01 | down | 2.33   | up   | 1.20 | up   | 1.30 | up   | 1.06 | down | ABA |
| Os.21563.1.S1_a_at | LOC_Os01g07120 | AP2 domain containing protein, expressed                                              | 1.01 | down | 1.11 | down | 4.25   | up   | 1.35 | up   | 1.56 | up   | 1.68 | up   | ABA |
| Os.21629.1.S1_at   | LOC_Os09g39940 | plastocyanin-like domain containing protein, putative, expressed                      | 1.21 | down | 1.66 | down | 4.25   | up   | 1.10 | down | 1.52 | up   | 1.53 | up   | ABA |
| Os.21635.1.S1_at   | LOC_Os12g03860 | major facilitator superfamily antiporter, putative, expressed                         | 1.56 | down | 1.28 | down | 4.04   | up   | 1.07 | up   | 1.54 | up   | 1.68 | down | ABA |
| Os.21636.2.S1_a_at | LOC_Os09g36250 | MYB family transcription factor, putative, expressed                                  | 1.29 | down | 1.79 | down | 3.52   | down | 1.35 | down | 1.38 | down | 1.19 | down | ABA |
| Os.21764.1.S1_at   | LOC_Os04g56710 | GTP cyclohydrolase I 1, putative, expressed                                           | 1.09 | up   | 1.15 | down | 2.35   | down | 1.39 | up   | 1.11 | down | 1.02 | up   | ABA |
| Os.21792.1.S1_at   | LOC_Os04g14790 | FAD dependent oxidoreductase domain containing protein, expressed                     | 1.00 | up   | 1.04 | down | 2.84   | up   | 1.06 | up   | 1.67 | up   | 1.28 | up   | ABA |
| Os.21806.1.S1_at   | AK063130       | Oryza sativa Japonica Group cDNA clone:001-111-F06, full insert sequence.             | 1.25 | up   | 1.22 | down | 5.75   | up   | 1.05 | down | 1.40 | down | 1.39 | down | ABA |
| Os.21817.1.S1_at   | LOC_Os01g21650 | plant protein of unknown function domain containing protein, expressed                | 4.87 | down | 1.03 | down | 16.67  | down | 1.35 | up   | 1.03 | down | 4.81 | down | 3   |
| Os.21858.2.S1_x_at | AK071600       | Oryza sativa Japonica Group cDNA clone:J023105E08, full insert sequence.              | 1.46 | up   | 1.17 | up   | 2.10   | down | 1.29 | up   | 1.30 | up   | 1.11 | up   | ABA |
| Os.21870.1.S1_at   | LOC_Os02g45750 | protein kinase domain containing protein, expressed                                   | 1.47 | down | 1.11 | down | 2.58   | down | 1.29 | up   | 1.25 | down | 1.35 | down | ABA |
| Os.21893.1.S1_x_at | LOC_Os04g59160 | peroxidase precursor, putative, expressed                                             | 2.09 | up   | 1.91 | up   | 2.61   | down | 1.81 | up   | 5.29 | down | 2.22 | down | 4   |
| Os.2202.2.S1_x_at  | BGIOSBCE000693 | Oryza sativa (japonica cultivar-group) Os01g0198100 (Os01g0198100) mRNA, partial cDNA | 1.02 | down | 1.01 | down | 2.12   | up   | 1.07 | down | 1.09 | down | 1.06 | down | ABA |
| Os.2202.3.S1_x_at  | LOC_Os01g01040 | RNA-dependent RNA polymerase, putative, expressed                                     | 1.14 | up   | 1.07 | down | 2.48   | up   | 1.00 | down | 1.06 | up   | 1.02 | up   | ABA |
| Os.22169.1.S1_a_at | LOC_Os06g51084 | 1,4-alpha-glucan-branching enzyme, chloroplast precursor, putative, expressed         | 1.13 | down | 1.02 | up   | 2.28   | up   | 1.08 | down | 1.02 | up   | 1.06 | down | ABA |
| Os.22169.2.S2_a_at | LOC_Os06g51084 | 1,4-alpha-glucan-branching enzyme, chloroplast precursor, putative, expressed         | 1.04 | down | 1.14 | down | 2.07   | up   | 1.10 | down | 1.01 | down | 1.06 | up   | ABA |
| Os.2219.1.S1_at    | LOC_Os03g58980 | Cupin domain containing protein, expressed                                            | 1.03 | down | 1.20 | up   | 4.46   | down | 1.65 | up   | 1.43 | down | 1.19 | down | ABA |
| Os.22241.1.S1_s_at | LOC_Os11g41150 | nitrilase-associated protein, putative, expressed                                     | 1.51 | down | 1.18 | up   | 4.40   | down | 1.00 | down | 1.88 | down | 1.19 | up   | ABA |
| Os.22263.1.S1_a_at | LOC_Os07g40550 | fBS1, putative, expressed                                                             | 1.05 | up   | 1.09 | up   | 2.17   | down | 1.07 | up   | 1.08 | down | 1.08 | down | ABA |

|                    |                |                                                                                             |      |      |      |      |        |      |      |      |       |      |      |      |     |
|--------------------|----------------|---------------------------------------------------------------------------------------------|------|------|------|------|--------|------|------|------|-------|------|------|------|-----|
| Os.22271.2.S1_x_at | AK103312       | transcriptional factor B3 family protein / auxin-responsive factor                          | 2.72 | up   | 1.05 | down | 1.32   | down | 1.21 | down | 1.41  | up   | 1.39 | up   | IAA |
| Os.22278.1.S1_at   | LOC_Os09g38320 | phytoene synthase, chloroplast precursor, putative, expressed                               | 1.51 | up   | 1.36 | down | 23.72  | up   | 1.26 | down | 2.13  | up   | 1.60 | up   | 2   |
| Os.2230.1.S1_at    | LOC_Os02g50960 | auxin efflux carrier component, putative, expressed                                         | 2.55 | up   | 1.15 | down | 1.65   | down | 1.08 | up   | 1.23  | up   | 1.20 | up   | IAA |
| Os.22312.2.S1_at   | AK063864       | Oryza sativa Japonica Group cDNA clone:001-122-E02, full insert sequence.                   | 1.09 | up   | 1.25 | up   | 3.83   | up   | 1.16 | up   | 1.14  | up   | 1.12 | down | ABA |
| Os.22312.3.A1_a_at | LOC_Os05g28740 | universal stress protein domain containing protein, putative, expressed                     | 1.13 | up   | 1.02 | up   | 2.37   | up   | 1.14 | down | 1.38  | up   | 1.96 | down | ABA |
| Os.2235.1.S1_a_at  | LOC_Os12g06010 | retrotransposon protein, putative, unclassified, expressed                                  | 1.04 | up   | 1.08 | up   | 39.94  | up   | 1.20 | down | 1.45  | up   | 1.17 | up   | ABA |
| Os.2239.1.S1_at    | LOC_Os03g02050 | LTP151 - Protease inhibitor/seed storage/LTP family protein precursor, expressed            | 2.76 | up   | 1.63 | up   | 101.58 | up   | 2.21 | up   | 2.09  | up   | 1.28 | up   | 4   |
| Os.22415.1.S1_s_at | LOC_Os06g43430 | cytochrome P450, putative, expressed                                                        | 1.73 | down | 1.43 | up   | 3.69   | down | 1.10 | up   | 1.40  | down | 1.66 | down | ABA |
| Os.2243.1.S1_a_at  | LOC_Os05g03610 | phospholipase C, putative, expressed                                                        | 1.32 | down | 1.76 | up   | 4.56   | down | 1.12 | down | 2.27  | down | 1.31 | up   | 2   |
| Os.22478.2.S1_at   | LOC_Os01g60650 | non-green plastid inner envelope membrane protein, putative, expressed                      | 1.94 | down | 1.90 | down | 2.84   | up   | 1.01 | down | 1.21  | down | 1.26 | down | ABA |
| Os.22485.1.A1_at   | LOC_Os11g29720 | cytochrome P450, putative, expressed                                                        | 1.37 | down | 2.38 | down | 3.10   | down | 2.27 | down | 3.18  | down | 2.18 | up   | 5   |
| Os.2250.1.S1_a_at  | LOC_Os05g49440 | DUF1264 domain containing protein, putative, expressed                                      | 1.05 | up   | 1.00 | up   | 436.61 | up   | 1.01 | down | 1.00  | up   | 1.05 | up   | ABA |
| Os.2254.1.S1_at    | LOC_Os07g03770 | Homeobox domain containing protein, expressed                                               | 1.01 | up   | 1.18 | down | 2.06   | down | 1.29 | up   | 1.14  | up   | 1.09 | down | ABA |
| Os.22563.1.S1_at   | LOC_Os03g61030 | transcription termination factor nusG family protein, expressed                             | 1.11 | up   | 1.39 | up   | 4.12   | down | 1.26 | down | 1.83  | down | 1.23 | down | ABA |
| Os.22571.1.S1_at   | AF022734       | Oryza sativa zinc inducible protein mRNA, complete cds.                                     | 1.04 | up   | 1.48 | up   | 10.22  | up   | 1.17 | up   | 2.66  | up   | 1.54 | up   | 2   |
| Os.22577.2.S1_x_at | LOC_Os01g32770 | DUF260 domain containing protein, putative, expressed                                       | 1.40 | down | 1.02 | up   | 2.92   | down | 1.51 | up   | 1.80  | down | 1.40 | down | ABA |
| Os.22594.1.S1_at   | LOC_Os01g03390 | BBT17 - Bowman-Birk type bran trypsin inhibitor precursor, expressed                        | 1.26 | down | 1.29 | up   | 4.89   | up   | 1.13 | up   | 2.00  | up   | 2.20 | up   | 3   |
| Os.2260.1.S1_at    | LOC_Os06g05690 | cysteine synthase, chloroplast/chromoplast precursor, putative, expressed                   | 1.75 | down | 2.85 | up   | 19.55  | down | 1.14 | down | 2.09  | down | 1.46 | down | 3   |
| Os.22624.1.A1_at   | LOC_Os02g43920 | cell division cycle protein 23, putative, expressed                                         | 1.04 | down | 1.18 | down | 17.41  | up   | 1.92 | down | 1.11  | down | 1.75 | down | ABA |
| Os.22631.1.S1_a_at | LOC_Os07g42960 | phospho-2-dehydro-3-deoxyheptonate aldolase, chloroplast precursor, putative, expressed     | 1.01 | down | 1.02 | up   | 2.79   | down | 1.24 | up   | 1.15  | down | 2.01 | up   | 2   |
| Os.22640.1.A1_at   | LOC_Os01g10830 | carnitine racemase like protein, putative, expressed                                        | 1.07 | up   | 1.49 | up   | 1.56   | up   | 1.20 | up   | 1.33  | up   | 3.42 | up   | JA  |
| Os.22651.1.S1_at   | LOC_Os04g56230 | polyprenyl synthetase, putative, expressed                                                  | 1.05 | down | 2.00 | up   | 7.68   | down | 1.37 | down | 2.32  | down | 1.80 | down | 3   |
| Os.22660.2.S1_at   | LOC_Os02g06640 | ubiquitin family protein, putative, expressed                                               | 1.16 | down | 1.15 | down | 2.57   | up   | 1.17 | up   | 1.62  | up   | 1.08 | up   | ABA |
| Os.22667.1.S1_at   | LOC_Os04g40910 | OsFBX146 - F-box domain containing protein, expressed                                       | 1.09 | up   | 1.21 | down | 3.22   | up   | 1.05 | up   | 1.28  | up   | 1.16 | up   | ABA |
| Os.22711.1.A1_at   | LOC_Os03g06350 | DUF623 domain containing protein, expressed                                                 | 1.23 | up   | 1.38 | down | 5.89   | up   | 1.26 | down | 1.22  | up   | 1.07 | up   | ABA |
| Os.22726.1.A1_at   | LOC_Os10g37110 | transposon protein, putative, unclassified, expressed                                       | 1.21 | up   | 1.40 | down | 3.22   | up   | 1.01 | down | 1.86  | up   | 1.46 | up   | ABA |
| Os.22730.1.S1_at   | AK069547       | heat shock protein, low molecular weight                                                    | 1.15 | down | 1.01 | up   | 1.25   | down | 1.17 | down | 2.83  | up   | 1.20 | down | SA  |
| Os.22731.1.S1_at   | D12635         | Oryza sativa Japonica Group mRNA for low molecular weight heat shock protein, complete cds. | 1.45 | down | 1.01 | up   | 2.12   | up   | 1.06 | up   | 18.01 | up   | 1.12 | up   | 2   |
| Os.22735.1.S1_at   | LOC_Os06g47150 | auxin response factor 18, putative, expressed                                               | 1.17 | up   | 1.05 | down | 2.34   | up   | 1.02 | down | 1.06  | up   | 1.10 | down | ABA |
| Os.22744.1.A1_at   | LOC_Os08g01370 | expressed protein                                                                           | 1.01 | down | 1.00 | up   | 88.85  | up   | 1.00 | up   | 1.00  | down | 1.01 | up   | ABA |
| Os.22783.1.S1_s_at | LOC_Os05g31750 | annexin, putative, expressed                                                                | 1.10 | up   | 1.07 | down | 3.27   | down | 1.25 | down | 1.34  | down | 2.56 | up   | 2   |
| Os.22812.1.S1_a_at | LOC_Os01g57720 | expressed protein                                                                           | 1.05 | up   | 1.19 | down | 2.06   | up   | 1.08 | up   | 1.24  | up   | 1.09 | up   | ABA |
| Os.22819.1.S1_at   | LOC_Os08g37060 | gibberellin receptor GID1L2, putative, expressed                                            | 1.39 | down | 1.03 | down | 2.30   | down | 1.05 | up   | 1.39  | down | 1.01 | up   | ABA |
| Os.22827.1.A1_x_at | LOC_Os12g06280 | expressed protein                                                                           | 1.50 | up   | 1.27 | down | 2.02   | up   | 1.86 | down | 1.09  | down | 1.39 | down | ABA |
| Os.22832.1.S1_at   | LOC_Os09g24620 | expressed protein                                                                           | 1.22 | down | 1.36 | up   | 6.03   | down | 1.93 | down | 2.78  | down | 1.84 | down | 2   |
| Os.22839.1.S1_at   | LOC_Os06g48200 | glycosyl hydrolases family 16, putative, expressed                                          | 1.39 | up   | 1.13 | up   | 14.69  | up   | 1.30 | down | 2.86  | up   | 1.36 | up   | 2   |
| Os.22839.1.S2_at   | LOC_Os06g48200 | glycosyl hydrolases family 16, putative, expressed                                          | 1.11 | up   | 1.01 | up   | 2.86   | up   | 1.12 | down | 1.82  | up   | 1.10 | up   | ABA |
| Os.22908.1.S1_at   | LOC_Os06g50400 | expansin precursor, putative, expressed                                                     | 1.05 | up   | 1.14 | down | 2.51   | down | 1.09 | down | 1.20  | up   | 3.84 | down | 2   |
| Os.22910.1.S1_at   | LOC_Os04g39880 | Os4bglu12 - beta-glucosidase, exo-beta-glucanase, expressed                                 | 1.35 | down | 1.32 | up   | 2.44   | down | 1.39 | up   | 1.34  | down | 1.46 | up   | ABA |
| Os.22910.2.S1_at   | AK105375       | glycosyl hydrolase family 1 protein                                                         | 1.84 | down | 1.58 | up   | 4.01   | down | 1.62 | up   | 1.12  | down | 1.80 | up   | ABA |
| Os.22911.1.S1_a_at | LOC_Os06g01630 | 2-oxo acid dehydrogenases acyltransferase domain containing protein, expressed              | 1.13 | up   | 1.05 | down | 2.68   | up   | 1.00 | down | 2.00  | up   | 1.62 | up   | ABA |
| Os.22928.2.S1_at   | LOC_Os02g37040 | peptide transporter PTR3-A, putative, expressed                                             | 1.40 | down | 1.35 | down | 3.66   | up   | 1.01 | up   | 1.59  | up   | 1.03 | up   | ABA |
| Os.22932.1.S1_at   | AK120355       | Oryza sativa (japonica cultivar-group) Os04g0540500 (Os04g0540500) mRNA, complete cds.      | 1.09 | down | 1.07 | down | 2.94   | up   | 1.26 | up   | 1.25  | up   | 1.19 | up   | ABA |
| Os.22957.1.S1_at   | LOC_Os01g72140 | glutathione S-transferase, expressed                                                        | 1.41 | up   | 1.18 | down | 2.99   | down | 1.79 | up   | 5.14  | down | 1.85 | down | 2   |
| Os.22966.1.S1_at   | LOC_Os03g17350 | white-brown complex homolog protein, putative, expressed                                    | 1.40 | up   | 1.20 | up   | 8.08   | up   | 1.20 | down | 1.50  | up   | 1.22 | down | ABA |
| Os.23021.1.S1_at   | LOC_Os03g62480 | anthocyanidin 5,3-O-glucosyltransferase, putative, expressed                                | 1.62 | up   | 1.21 | up   | 1.10   | up   | 1.36 | up   | 9.78  | up   | 1.43 | up   | SA  |
| Os.23028.1.S1_s_at | LOC_Os03g08490 | AP2 domain containing protein, expressed                                                    | 2.71 | up   | 1.07 | down | 2.44   | up   | 1.57 | up   | 1.84  | up   | 1.13 | down | 2   |
| Os.23033.1.S1_s_at | LOC_Os01g09020 | WD domain, G-beta repeat domain containing protein, expressed                               | 1.01 | down | 1.09 | down | 2.39   | up   | 1.00 | down | 1.50  | up   | 1.14 | down | ABA |
| Os.23043.1.A1_x_at | LOC_Os10g39720 | homeobox domain containing protein                                                          | 5.09 | up   | 1.60 | up   | 10.54  | up   | 1.03 | down | 1.03  | up   | 1.01 | up   | 2   |
| Os.23059.1.S1_s_at | CA754790       | expressed protein                                                                           | 2.49 | down | 1.39 | down | 14.57  | down | 1.01 | down | 1.48  | down | 3.44 | down | 3   |
| Os.23067.1.S1_at   | LOC_Os04g55600 | expressed protein                                                                           | 1.19 | down | 1.21 | up   | 9.87   | up   | 1.07 | up   | 1.14  | down | 3.66 | down | 2   |
| Os.2307.1.S1_at    | LOC_Os05g50360 | anaphase-promoting complex subunit 10, putative, expressed                                  | 1.18 | up   | 1.14 | up   | 2.24   | down | 1.11 | down | 1.85  | down | 1.40 | down | ABA |
| Os.23084.1.S1_at   | LOC_Os03g49270 | THION36 - Plant thionin family protein precursor, expressed                                 | 1.06 | down | 1.06 | up   | 2.42   | down | 1.17 | down | 1.67  | down | 2.54 | down | 2   |
| Os.23087.1.S1_at   | LOC_Os05g10690 | Myb transcription factor, putative, expressed                                               | 1.01 | down | 1.00 | up   | 4.63   | up   | 1.56 | down | 1.75  | down | 1.12 | down | ABA |
| Os.23100.1.S1_at   | LOC_Os07g37310 | uncharacterized secreted protein, putative, expressed                                       | 1.25 | up   | 1.02 | down | 4.07   | up   | 1.06 | down | 1.14  | down | 1.11 | up   | ABA |

|                    |                |                                                                                       |       |      |      |      |       |      |      |      |       |      |       |      |     |
|--------------------|----------------|---------------------------------------------------------------------------------------|-------|------|------|------|-------|------|------|------|-------|------|-------|------|-----|
| Os.23154.1.S1_at   | LOC_Os02g50690 | GDSL-like lipase/acylhydrolase, putative, expressed                                   | 1.02  | up   | 1.53 | down | 4.12  | up   | 1.64 | up   | 5.69  | up   | 1.72  | up   | 2   |
| Os.23164.1.S1_a_at | LOC_Os07g39980 | GA22009-PA, putative, expressed                                                       | 1.08  | up   | 1.53 | up   | 3.70  | down | 1.12 | down | 1.43  | down | 1.15  | down | ABA |
| Os.23174.1.S1_at   | LOC_Os08g14200 | glycosyl hydrolases family 16, putative, expressed                                    | 3.80  | down | 2.25 | down | 3.57  | down | 1.47 | down | 1.78  | up   | 2.30  | down | 4   |
| Os.23179.1.S1_at   | LOC_Os06g49990 | UPF0183 protein, putative, expressed                                                  | 1.19  | up   | 1.03 | up   | 2.03  | up   | 1.07 | down | 1.20  | up   | 1.12  | down | ABA |
| Os.23181.1.S1_at   | LOC_Os01g03530 | multicopper oxidase domain containing protein, expressed                              | 1.48  | up   | 1.10 | up   | 3.25  | up   | 4.41 | up   | 5.16  | up   | 1.37  | down | 3   |
| Os.23183.1.S1_at   | LOC_Os09g28160 | phosphate carrier protein, mitochondrial precursor, putative, expressed               | 2.27  | up   | 1.17 | up   | 2.54  | up   | 1.45 | up   | 5.32  | up   | 2.23  | up   | 4   |
| Os.23185.1.S1_at   | NM_001070757   | Oryza sativa (japonica cultivar-group) Os10g0167200 (Os10g0167200) mRNA, complete cds | 1.77  | up   | 1.32 | down | 2.56  | up   | 1.07 | down | 4.38  | up   | 2.68  | up   | 3   |
| Os.23215.1.S1_at   | LOC_Os06g24404 | GDSL-like lipase/acylhydrolase, putative, expressed                                   | 1.09  | down | 1.02 | down | 2.44  | down | 1.48 | down | 1.15  | down | 1.09  | up   | ABA |
| Os.23217.1.S1_s_at | LOC_Os05g03830 | aminotransferase, putative, expressed                                                 | 1.20  | up   | 1.12 | up   | 1.06  | up   | 1.23 | up   | 1.35  | up   | 2.21  | up   | JA  |
| Os.23219.1.S1_at   | LOC_Os01g52690 | retrotransposon protein, putative, unclassified, expressed                            | 1.40  | up   | 1.23 | down | 9.05  | up   | 1.21 | up   | 1.09  | up   | 1.04  | down | ABA |
| Os.23222.1.S1_at   | AU225797       |                                                                                       | 1.21  | down | 1.01 | up   | 1.70  | down | 1.44 | up   | 1.54  | down | 4.85  | down | JA  |
| Os.23231.1.A1_at   | LOC_Os03g09090 | expressed protein                                                                     | 1.02  | up   | 1.03 | down | 3.75  | up   | 1.02 | up   | 1.06  | up   | 1.22  | up   | ABA |
| Os.23252.1.S1_at   | LOC_Os10g40620 | expressed protein                                                                     | 1.09  | up   | 1.14 | up   | 2.84  | down | 1.13 | down | 1.52  | down | 1.16  | down | ABA |
| Os.23256.1.S1_at   | LOC_Os02g56120 | OslAA9 - Auxin-responsive Aux/IAA gene family member, expressed                       | 33.47 | up   | 1.28 | up   | 2.63  | up   | 1.25 | down | 1.73  | up   | 1.10  | up   | 2   |
| Os.23290.2.S1_x_at | LOC_Os10g40960 | oxidoreductase, 2OG-Fe oxygenase family protein, putative, expressed                  | 1.12  | up   | 1.48 | up   | 2.19  | down | 1.12 | down | 1.10  | down | 1.20  | down | ABA |
| Os.23297.1.S1_at   | LOC_Os03g56860 | expressed protein                                                                     | 1.43  | up   | 1.16 | up   | 4.95  | up   | 1.05 | down | 3.50  | up   | 1.19  | down | 2   |
| Os.23303.1.A1_at   | LOC_Os03g26044 | CSLA5 - cellulose synthase-like family A; mannan synthase, expressed                  | 1.04  | up   | 1.12 | down | 29.04 | up   | 1.04 | down | 1.26  | up   | 1.03  | down | ABA |
| Os.23359.1.S1_at   | LOC_Os05g39850 | MCM3 - Putative minichromosome maintenance MCM complex subunit 3, expressed           | 1.44  | down | 1.06 | down | 4.10  | down | 1.08 | down | 2.18  | down | 1.86  | down | 2   |
| Os.23381.1.A1_at   | LOC_Os09g19710 | hypersensitive-induced response protein, putative, expressed                          | 1.15  | down | 1.07 | down | 3.89  | up   | 4.13 | up   | 1.11  | up   | 2.03  | down | 3   |
| Os.23397.1.S1_at   | LOC_Os08g37874 | 2-nitropropane dioxygenase family, putative, expressed                                | 1.96  | up   | 1.00 | down | 8.28  | up   | 1.14 | up   | 12.75 | up   | 5.21  | up   | 3   |
| Os.23397.1.S2_at   | LOC_Os08g37874 | 2-nitropropane dioxygenase family, putative, expressed                                | 2.11  | up   | 1.14 | down | 24.00 | up   | 2.11 | up   | 18.76 | up   | 6.60  | up   | 5   |
| Os.23411.1.S1_at   | LOC_Os02g42660 | sphingolipid delta desaturase, putative, expressed                                    | 1.06  | down | 1.14 | down | 2.39  | down | 1.06 | up   | 1.34  | down | 1.11  | down | ABA |
| Os.23416.2.S1_at   | LOC_Os07g39270 | polyprenyl synthetase, putative, expressed                                            | 1.06  | down | 1.07 | up   | 2.12  | up   | 1.18 | up   | 1.08  | down | 1.75  | up   | ABA |
| Os.2344.1.S1_at    | LOC_Os10g28230 | Core histone H2A/H2B/H3/H4 domain containing protein, putative, expressed             | 1.29  | down | 1.11 | down | 3.51  | down | 1.27 | down | 1.79  | down | 1.72  | down | ABA |
| Os.23454.1.A1_at   | LOC_Os12g07810 | aldehyde dehydrogenase, putative, expressed                                           | 1.07  | down | 1.05 | down | 1.14  | down | 1.08 | down | 1.05  | up   | 2.18  | up   | JA  |
| Os.23468.1.A1_at   | LOC_Os09g27940 | aspartic proteinase nepenthesin-1 precursor, putative, expressed                      | 2.18  | up   | 1.22 | down | 6.53  | up   | 1.16 | up   | 2.50  | up   | 1.94  | up   | 3   |
| Os.23471.2.S1_x_at | LOC_Os11g18366 | cycloartenol synthase, putative, expressed                                            | 1.01  | down | 1.00 | up   | 2.86  | up   | 1.00 | up   | 1.00  | down | 1.04  | up   | ABA |
| Os.23482.1.S1_at   | LOC_Os08g19420 | O-methyltransferase, putative, expressed                                              | 1.23  | down | 1.48 | up   | 45.97 | up   | 1.06 | down | 1.36  | down | 1.24  | down | ABA |
| Os.23492.1.A1_at   | LOC_Os07g37820 | expressed protein                                                                     | 3.64  | up   | 1.35 | up   | 1.72  | up   | 1.00 | down | 1.09  | down | 2.33  | down | 2   |
| Os.23504.1.A1_at   | LOC_Os01g10530 | expressed protein                                                                     | 1.03  | up   | 1.21 | up   | 2.75  | up   | 1.11 | up   | 1.01  | down | 1.26  | up   | ABA |
| Os.23544.1.S1_at   | LOC_Os02g48740 | fibrin-like protein 2, putative, expressed                                            | 1.24  | up   | 1.11 | up   | 2.12  | up   | 1.16 | down | 1.20  | up   | 1.07  | down | ABA |
| Os.23551.1.S1_at   | LOC_Os02g05900 | ternary complex factor MIP1, putative, expressed                                      | 1.03  | up   | 1.10 | down | 2.47  | down | 1.04 | down | 1.05  | down | 1.30  | down | ABA |
| Os.2357.1.S1_at    | LOC_Os07g36190 | hydrolase, NUDIX family, domain containing protein, expressed                         | 1.11  | down | 1.08 | up   | 2.19  | down | 1.18 | down | 1.55  | down | 1.17  | down | ABA |
| Os.2362.1.S1_a_at  | LOC_Os02g35770 | homeobox associated leucine zipper, putative, expressed                               | 1.07  | up   | 1.08 | down | 24.27 | up   | 1.12 | up   | 1.11  | up   | 1.63  | up   | ABA |
| Os.2362.2.S1_x_at  | LOC_Os02g35770 | homeobox associated leucine zipper, putative, expressed                               | 1.02  | up   | 1.00 | down | 27.58 | up   | 1.08 | up   | 1.03  | up   | 1.20  | up   | ABA |
| Os.2363.1.S1_a_at  | LOC_Os09g35910 | homeobox associated leucine zipper, putative, expressed                               | 1.16  | down | 1.53 | down | 3.76  | up   | 1.03 | down | 1.24  | up   | 1.14  | down | ABA |
| Os.23632.1.S1_s_at | LOC_Os06g20610 | seven in absentia protein family domain containing protein, expressed                 | 1.01  | down | 1.03 | up   | 2.87  | up   | 1.11 | up   | 1.23  | up   | 1.01  | up   | ABA |
| Os.2365.1.S1_at    | LOC_Os06g04870 | homeobox associated leucine zipper, putative, expressed                               | 2.17  | up   | 1.10 | up   | 2.41  | down | 1.14 | down | 1.43  | up   | 1.45  | down | 2   |
| Os.23656.1.A1_at   | LOC_Os04g57650 | expressed protein                                                                     | 1.08  | down | 1.37 | down | 2.28  | down | 1.30 | down | 1.13  | up   | 1.11  | down | ABA |
| Os.2367.1.S1_at    | LOC_Os03g21820 | expansin precursor, putative, expressed                                               | 1.94  | up   | 1.07 | down | 2.08  | down | 1.77 | up   | 1.82  | up   | 1.01  | up   | ABA |
| Os.23678.1.A1_at   | LOC_Os12g21789 | expressed protein                                                                     | 1.43  | down | 1.40 | down | 2.71  | up   | 1.28 | up   | 1.29  | up   | 1.18  | up   | ABA |
| Os.23695.2.S1_at   | LOC_Os01g70950 | spermatogenesis-associated protein 20 precursor, putative, expressed                  | 1.14  | down | 1.01 | down | 4.17  | up   | 1.21 | down | 1.39  | up   | 1.07  | down | ABA |
| Os.23695.3.S1_x_at | LOC_Os01g70950 | spermatogenesis-associated protein 20 precursor, putative, expressed                  | 1.11  | up   | 1.14 | down | 4.43  | up   | 1.31 | down | 1.18  | up   | 1.05  | up   | ABA |
| Os.23700.1.A1_at   | AK243128       | phox (PX) domain-containing protein                                                   | 1.30  | down | 1.23 | down | 2.15  | up   | 1.34 | up   | 1.50  | up   | 1.37  | up   | ABA |
| Os.23712.2.S1_at   | LOC_Os08g17784 | purple acid phosphatase, putative, expressed                                          | 1.06  | up   | 1.02 | up   | 10.24 | up   | 1.04 | down | 1.40  | up   | 1.15  | down | ABA |
| Os.2373.1.S1_at    | LOC_Os10g40710 | expansin precursor, putative, expressed                                               | 1.23  | down | 1.27 | up   | 2.49  | down | 1.07 | up   | 2.94  | down | 1.51  | down | 2   |
| Os.2375.1.S1_at    | LOC_Os04g41980 | ATOZ11, putative, expressed                                                           | 1.14  | down | 1.00 | down | 1.09  | down | 1.11 | down | 1.28  | down | 10.91 | up   | JA  |
| Os.2376.1.S1_at    | LOC_Os03g17480 | IN2-1 protein, putative, expressed                                                    | 7.32  | up   | 1.46 | down | 17.21 | up   | 1.68 | up   | 21.71 | up   | 9.22  | up   | 4   |
| Os.23770.1.A1_s_at | LOC_Os01g49280 | zinc finger family protein, putative, expressed                                       | 1.97  | down | 2.12 | down | 7.84  | up   | 1.37 | down | 1.30  | up   | 1.00  | down | 2   |
| Os.23778.1.S1_at   | LOC_Os02g32590 | HSF-type DNA-binding domain containing protein, expressed                             | 1.63  | up   | 1.13 | down | 2.50  | up   | 1.27 | down | 1.83  | up   | 1.39  | down | ABA |
| Os.23802.1.A1_at   | LOC_Os04g39540 | expressed protein                                                                     | 1.31  | up   | 1.05 | up   | 2.17  | up   | 1.23 | up   | 1.61  | up   | 1.25  | down | ABA |
| Os.23942.1.A1_at   | LOC_Os02g35180 | OsRR2 type-A response regulator, expressed                                            | 1.95  | down | 6.67 | up   | 13.59 | down | 1.05 | up   | 3.72  | down | 2.20  | down | 4   |
| Os.23950.1.A1_at   | LOC_Os07g07310 | polynucleotide phosphorylase, putative, expressed                                     | 1.16  | up   | 1.09 | up   | 4.23  | down | 1.22 | down | 1.94  | down | 1.30  | down | ABA |
| Os.23978.1.A1_at   | LOC_Os04g41460 | transporter family protein, putative, expressed                                       | 1.12  | up   | 1.11 | up   | 2.47  | up   | 1.31 | down | 1.07  | down | 1.05  | up   | ABA |
| Os.24025.1.S1_at   | LOC_Os11g03160 | glycosyl transferase, family 8, putative, expressed                                   | 1.16  | down | 1.55 | up   | 2.06  | down | 1.05 | up   | 1.15  | down | 1.35  | down | ABA |

|                    |                |                                                                                      |      |      |      |      |       |      |      |      |       |      |      |      |     |
|--------------------|----------------|--------------------------------------------------------------------------------------|------|------|------|------|-------|------|------|------|-------|------|------|------|-----|
| Os.24032.1.S1_at   | AK100879       | Oryza sativa Japonica Group cDNA clone:J023127D23, full insert sequence.             | 2.71 | up   | 1.04 | up   | 3.76  | up   | 1.14 | down | 2.40  | up   | 1.10 | up   | 3   |
| Os.24032.2.S1_at   | LOC_Os02g50805 | transposon protein, putative, CACTA, En/Spm sub-class, expressed                     | 1.54 | up   | 1.37 | down | 3.84  | up   | 1.59 | up   | 2.44  | up   | 1.44 | up   | 2   |
| Os.24034.2.S1_x_at | LOC_Os01g65400 | DNA polymerase I, putative, expressed                                                | 1.06 | down | 1.11 | up   | 2.62  | down | 1.10 | down | 1.45  | down | 1.12 | down | ABA |
| Os.2404.1.S1_at    | LOC_Os10g40700 | expansin precursor, putative, expressed                                              | 1.03 | up   | 1.77 | up   | 6.45  | down | 1.04 | up   | 1.77  | down | 1.32 | down | ABA |
| Os.24051.2.S1_at   | LOC_Os04g33640 | glycosyl hydrolases family 17, putative, expressed                                   | 1.72 | up   | 1.01 | up   | 2.17  | up   | 1.02 | up   | 1.08  | down | 1.10 | down | ABA |
| Os.24059.1.A1_at   | LOC_Os04g10380 | glycine-rich protein, putative, expressed                                            | 1.03 | down | 1.16 | down | 2.55  | up   | 1.05 | up   | 1.21  | up   | 1.01 | down | ABA |
| Os.2406.2.S1_a_at  | LOC_Os02g44360 | scarecrow transcription factor family protein, putative, expressed                   | 1.06 | up   | 1.03 | down | 2.08  | down | 1.07 | up   | 1.06  | up   | 1.15 | down | ABA |
| Os.2407.1.S1_at    | LOC_Os09g31200 | AN1-like zinc finger domain containing protein, expressed                            | 1.72 | up   | 1.19 | up   | 4.06  | up   | 1.29 | up   | 1.31  | up   | 1.69 | up   | ABA |
| Os.24103.1.A1_at   | LOC_Os07g18990 | LTPL40 - Protease inhibitor/seed storage/LTP family protein precursor, expressed     | 1.29 | up   | 1.07 | up   | 5.26  | down | 1.07 | down | 1.01  | up   | 1.39 | down | ABA |
| Os.24106.3.S1_at   | LOC_Os03g49464 | tetratricopeptide-like helical, putative, expressed                                  | 1.40 | down | 1.19 | down | 2.47  | up   | 1.06 | down | 1.01  | up   | 1.39 | down | ABA |
| Os.24115.1.A1_at   | AK062932       | Oryza sativa (indica cultivar-group) cDNA clone:OSIGCPI025D23, full insert sequence. | 1.60 | down | 3.26 | up   | 1.03  | up   | 1.12 | down | 1.66  | down | 1.67 | down | BAP |
| Os.24154.1.A1_at   | LOC_Os11g02640 | expressed protein                                                                    | 1.15 | up   | 1.01 | up   | 2.05  | up   | 1.13 | down | 1.16  | up   | 1.08 | down | ABA |
| Os.24190.1.A1_at   | LOC_Os07g08320 | RNA recognition motif containing protein, expressed                                  | 1.17 | down | 1.18 | up   | 7.41  | up   | 1.23 | up   | 2.10  | up   | 1.54 | up   | 2   |
| Os.24338.1.A1_at   | AK111667       | Oryza sativa Japonica Group cDNA clone:J013155L06, full insert sequence.             | 2.09 | up   | 1.85 | up   | 1.03  | down | 1.11 | down | 1.13  | down | 1.10 | down | IAA |
| Os.24363.1.A1_at   | LOC_Os08g33740 | CSLA11 - cellulose synthase-like family A, expressed                                 | 1.49 | down | 1.21 | down | 3.21  | down | 1.25 | down | 1.20  | down | 1.14 | up   | ABA |
| Os.24379.1.A1_at   | LOC_Os02g44900 | expressed protein                                                                    | 1.62 | down | 1.04 | up   | 2.06  | up   | 1.33 | down | 1.15  | down | 1.38 | down | ABA |
| Os.24403.1.A1_at   | LOC_Os03g17660 | expressed protein                                                                    | 1.07 | up   | 1.19 | down | 13.59 | up   | 1.36 | down | 1.09  | down | 1.32 | down | ABA |
| Os.24424.1.S1_at   | LOC_Os08g41270 | endonuclease/exonuclease/phosphatase family domain containing protein, expressed     | 1.05 | up   | 1.23 | up   | 2.98  | up   | 1.47 | down | 1.05  | down | 1.24 | down | ABA |
| Os.24469.1.A1_at   | CA761866       | ---                                                                                  | 1.05 | down | 1.02 | down | 2.94  | up   | 1.04 | down | 1.12  | down | 1.03 | down | ABA |
| Os.24493.1.A1_at   | LOC_Os08g37500 | expressed protein                                                                    | 1.14 | up   | 1.07 | down | 2.94  | up   | 1.31 | up   | 1.56  | up   | 1.05 | up   | ABA |
| Os.24495.1.S1_at   | LOC_Os03g29980 | ACT domain containing protein, expressed                                             | 1.11 | up   | 1.26 | up   | 4.53  | down | 1.05 | up   | 1.06  | down | 1.83 | up   | ABA |
| Os.24495.2.S1_x_at | LOC_Os03g29980 | ACT domain containing protein, expressed                                             | 1.45 | up   | 1.41 | up   | 4.88  | down | 1.04 | down | 1.04  | down | 1.64 | up   | ABA |
| Os.24545.2.S1_at   | LOC_Os03g30300 | 6-phosphogluconolactonase, putative, expressed                                       | 1.06 | down | 1.24 | up   | 4.90  | up   | 1.25 | down | 1.79  | up   | 1.03 | down | ABA |
| Os.24548.1.A1_at   | LOC_Os02g07480 | transglycosylase SLT domain containing protein, expressed                            | 1.31 | up   | 1.16 | down | 3.28  | up   | 1.40 | down | 1.54  | up   | 1.13 | down | ABA |
| Os.24577.1.S1_at   | LOC_Os12g39320 | DUF221 domain containing protein, expressed                                          | 1.30 | down | 1.07 | down | 3.38  | up   | 1.04 | up   | 1.04  | up   | 1.10 | down | ABA |
| Os.24599.1.A1_at   | LOC_Os02g15870 | molybdenum cofactor biosynthesis protein 1, putative, expressed                      | 1.17 | up   | 1.10 | down | 3.35  | up   | 1.02 | up   | 1.56  | up   | 1.19 | up   | ABA |
| Os.24683.1.A1_s_at | LOC_Os09g14520 | integral membrane protein, putative, expressed                                       | 1.11 | up   | 1.06 | up   | 2.04  | down | 1.08 | down | 1.14  | down | 1.17 | down | ABA |
| Os.24690.1.A1_s_at | LOC_Os04g55210 | chloride channel protein, putative, expressed                                        | 1.31 | up   | 1.33 | down | 2.59  | up   | 1.22 | up   | 1.38  | up   | 1.08 | up   | ABA |
| Os.24690.2.S1_s_at | LOC_Os04g55210 | chloride channel protein, putative, expressed                                        | 1.33 | up   | 1.07 | down | 3.21  | up   | 1.26 | up   | 1.41  | up   | 1.29 | up   | ABA |
| Os.24691.1.A1_s_at | LOC_Os04g49320 | tRNA-splicing endonuclease positive effector-related, putative, expressed            | 1.07 | up   | 2.04 | up   | 1.80  | down | 1.14 | down | 1.19  | down | 1.38 | down | BAP |
| Os.24698.1.S1_at   | LOC_Os11g37260 | SEY1, putative, expressed                                                            | 1.47 | down | 1.02 | down | 25.45 | up   | 1.23 | down | 1.04  | up   | 1.20 | down | ABA |
| Os.24698.2.S1_x_at | LOC_Os11g37260 | SEY1, putative, expressed                                                            | 1.11 | up   | 1.28 | down | 32.41 | up   | 1.02 | down | 1.12  | up   | 1.05 | up   | ABA |
| Os.24889.1.S1_at   | LOC_Os01g55040 | 1,3-beta-glucan synthase component, putative, expressed                              | 1.69 | down | 1.12 | up   | 2.15  | up   | 1.11 | up   | 1.09  | up   | 1.01 | up   | ABA |
| Os.24890.1.S2_at   | LOC_Os01g72130 | glutathione S-transferase, putative, expressed                                       | 2.75 | up   | 1.07 | down | 1.61  | up   | 1.15 | up   | 13.11 | up   | 1.34 | up   | 2   |
| Os.24913.1.A1_at   | LOC_Os04g48260 | zinc RING finger protein, putative, expressed                                        | 1.07 | down | 1.06 | down | 4.06  | up   | 1.00 | up   | 1.13  | up   | 1.15 | down | ABA |
| Os.24917.1.S1_at   | LOC_Os01g36790 | TKL_IRAK_DUF26-If.2 - DUF26 kinases have homology to DUF26 containing loci, expr     | 1.52 | up   | 1.06 | down | 3.59  | up   | 1.99 | up   | 2.00  | up   | 1.75 | up   | 3   |
| Os.24927.1.S1_at   | LOC_Os03g56160 | lectin-like receptor kinase 7, putative, expressed                                   | 1.33 | down | 1.21 | up   | 2.55  | down | 1.12 | down | 1.47  | down | 1.17 | down | ABA |
| Os.24943.1.S1_at   | LOC_Os01g72230 | stromal membrane-associated protein, putative, expressed                             | 1.10 | up   | 1.13 | down | 2.36  | down | 1.02 | down | 1.30  | down | 1.25 | down | ABA |
| Os.24951.1.S1_at   | LOC_Os12g37400 | MCM7 - Putative minichromosome maintenance MCM complex subunit 7, expressed          | 1.44 | down | 1.09 | down | 9.99  | down | 1.12 | down | 2.29  | down | 1.51 | down | 2   |
| Os.24952.1.S1_at   | LOC_Os04g57720 | OsRR6 type-A response regulator, expressed                                           | 1.09 | down | 8.48 | up   | 2.12  | down | 1.15 | up   | 2.17  | down | 2.11 | down | 4   |
| Os.24965.1.S1_at   | AK070313       | Oryza sativa Japonica Group cDNA clone:J023049J12, full insert sequence.             | 1.05 | down | 1.25 | up   | 2.22  | down | 1.89 | down | 1.20  | down | 1.40 | down | ABA |
| Os.24993.1.A1_s_at | LOC_Os02g07044 | rhodanese-like domain containing protein, putative, expressed                        | 1.39 | up   | 1.18 | down | 2.13  | down | 1.01 | down | 1.96  | up   | 1.58 | up   | ABA |
| Os.24995.1.S1_a_at | LOC_Os07g47250 | lipase precursor, putative, expressed                                                | 1.17 | up   | 1.19 | up   | 3.52  | up   | 1.22 | up   | 1.16  | up   | 1.16 | down | ABA |
| Os.25027.1.S1_a_at | LOC_Os07g46700 | zinc finger, RING-type, putative, expressed                                          | 1.00 | down | 1.05 | down | 3.77  | up   | 1.85 | up   | 1.09  | down | 1.42 | down | ABA |
| Os.25027.3.S1_at   | LOC_Os07g46700 | zinc finger, RING-type, putative, expressed                                          | 1.04 | up   | 1.04 | up   | 3.79  | up   | 1.44 | up   | 1.07  | down | 1.03 | up   | ABA |
| Os.25027.3.S1_x_at | LOC_Os07g46700 | zinc finger, RING-type, putative, expressed                                          | 1.08 | up   | 1.00 | up   | 3.45  | up   | 1.71 | up   | 1.11  | down | 1.41 | down | ABA |
| Os.25065.3.S1_at   | LOC_Os01g60309 | retrotransposon protein, putative, Ty1-copia subclass                                | 1.18 | up   | 1.16 | down | 2.05  | up   | 1.03 | down | 1.16  | up   | 1.12 | down | ABA |
| Os.25097.1.S1_at   | LOC_Os02g02750 | CDP-alcohol phosphatidyltransferase, putative, expressed                             | 1.02 | up   | 1.10 | down | 2.02  | down | 1.01 | down | 1.18  | down | 1.00 | down | ABA |
| Os.25102.1.S1_at   | AK064481       | Oryza sativa Japonica Group cDNA clone:002-111-A10, full insert sequence.            | 1.09 | up   | 1.06 | up   | 3.09  | up   | 1.09 | up   | 1.41  | up   | 1.07 | down | ABA |
| Os.25107.1.S1_at   | LOC_Os01g08750 | expressed protein                                                                    | 1.03 | down | 1.04 | down | 2.05  | up   | 1.06 | down | 1.03  | up   | 1.31 | down | ABA |
| Os.25128.1.S1_at   | LOC_Os02g09810 | amino acid transporter, putative, expressed                                          | 1.24 | up   | 1.06 | down | 3.25  | up   | 1.01 | up   | 2.25  | up   | 1.50 | up   | 2   |
| Os.25130.1.S1_at   | LOC_Os08g02450 | ATCHX, putative, expressed                                                           | 1.06 | up   | 1.07 | down | 2.91  | up   | 1.09 | up   | 1.54  | up   | 1.02 | down | ABA |
| Os.25142.1.A1_at   | LOC_Os10g40490 | U-box domain containing protein, expressed                                           | 1.01 | down | 1.37 | down | 4.05  | up   | 1.39 | down | 3.83  | up   | 2.18 | up   | 3   |
| Os.25168.2.A1_at   | CA759316       |                                                                                      | 1.16 | down | 1.15 | down | 3.56  | down | 1.01 | down | 1.23  | down | 1.08 | down | ABA |
| Os.25266.1.S1_at   | LOC_Os01g71690 | recA protein, expressed                                                              | 1.00 | up   | 1.53 | down | 4.44  | up   | 1.33 | down | 1.04  | down | 1.04 | up   | ABA |

|                    |                |                                                                                           |       |      |      |      |       |      |      |      |       |      |      |      |     |
|--------------------|----------------|-------------------------------------------------------------------------------------------|-------|------|------|------|-------|------|------|------|-------|------|------|------|-----|
| Os.25309.2.A1_a_at | CB682760       | M0006974 Oryza sativa miR444b stem-loop                                                   | 1.08  | up   | 1.06 | up   | 2.05  | up   | 1.06 | up   | 1.25  | down | 1.07 | down | ABA |
| Os.25414.1.S1_at   | LOC_Os07g30810 | nucleobase-ascorbate transporter, putative, expressed                                     | 1.20  | down | 1.14 | down | 2.51  | down | 1.23 | down | 1.42  | down | 1.05 | up   | ABA |
| Os.25432.1.S1_at   | LOC_Os02g22260 | fruit protein PKIW1502, putative, expressed                                               | 1.16  | up   | 1.03 | up   | 2.10  | down | 1.23 | down | 1.53  | down | 1.21 | down | ABA |
| Os.25444.1.S1_s_at | LOC_Os10g35050 | aquaporin protein, putative, expressed                                                    | 1.07  | down | 1.06 | down | 31.96 | up   | 1.06 | down | 1.79  | up   | 1.26 | down | ABA |
| Os.25452.1.S1_s_at | LOC_Os04g20070 | tropinone reductase 2, putative, expressed                                                | 1.37  | up   | 1.14 | up   | 7.54  | up   | 1.08 | down | 1.78  | up   | 1.21 | up   | ABA |
| Os.25496.1.S1_at   | LOC_Os11g07930 | oxidoreductase, short chain dehydrogenase/reductase family domain containing family       | 1.17  | down | 1.31 | up   | 2.00  | up   | 1.93 | down | 1.04  | up   | 1.05 | down | ABA |
| Os.25497.1.S1_at   | AB027421       | Oryza sativa mRNA for class III chitinase homologue (OsChib3H-b), complete cds, clone     | 1.81  | down | 1.04 | down | 6.85  | up   | 1.03 | up   | 3.15  | up   | 1.19 | up   | 2   |
| Os.25497.1.S1_x_at | AB027421       | Oryza sativa mRNA for class III chitinase homologue (OsChib3H-b), complete cds, clone     | 1.65  | down | 1.06 | down | 8.69  | up   | 1.04 | up   | 3.42  | up   | 1.17 | up   | 2   |
| Os.25529.1.S1_at   | LOC_Os05g44330 | DJ-1 family protein, putative, expressed                                                  | 1.22  | up   | 1.09 | up   | 3.35  | down | 1.23 | down | 1.59  | down | 1.23 | down | ABA |
| Os.25544.1.S1_at   | LOC_Os07g19444 | regulatory protein, putative, expressed                                                   | 1.22  | up   | 1.37 | down | 3.19  | up   | 1.18 | up   | 1.32  | up   | 1.14 | up   | ABA |
| Os.25546.1.S1_at   | LOC_Os05g22730 | expressed protein                                                                         | 1.14  | down | 2.65 | up   | 2.29  | down | 1.25 | up   | 1.76  | down | 2.60 | down | 3   |
| Os.25561.1.S1_at   | LOC_Os05g48270 | auxin-responsive protein, putative, expressed                                             | 1.37  | up   | 1.19 | up   | 2.91  | down | 1.24 | down | 1.50  | down | 1.36 | down | ABA |
| Os.25562.1.S1_at   | LOC_Os10g33920 | transporter-related, putative, expressed                                                  | 1.21  | down | 1.19 | up   | 3.87  | down | 1.90 | down | 2.00  | down | 1.20 | down | 2   |
| Os.2558.1.S1_a_at  | AK066452       | Oryza sativa (indica cultivar-group) cDNA clone:OSIGCEA019J09, full insert sequence       | 1.75  | down | 1.46 | down | 2.62  | down | 1.15 | down | 1.35  | down | 1.99 | up   | ABA |
| Os.25589.1.S1_at   | CT829769       | Oryza sativa (indica cultivar-group) cDNA clone:OSIGCEA019J09, full insert sequence       | 1.12  | up   | 1.03 | up   | 3.60  | up   | 1.02 | up   | 1.72  | up   | 1.51 | down | ABA |
| Os.25589.3.S1_at   | LOC_Os11g25780 | PB1 domain containing protein, expressed                                                  | 1.14  | up   | 1.02 | down | 4.41  | up   | 1.29 | down | 1.29  | up   | 1.24 | down | ABA |
| Os.25589.3.S1_x_at | LOC_Os11g25780 | PB1 domain containing protein, expressed                                                  | 1.01  | up   | 1.06 | down | 4.45  | up   | 1.15 | down | 1.34  | up   | 1.23 | down | ABA |
| Os.25621.2.S1_at   | LOC_Os12g16720 | cytochrome P450 71A1, putative, expressed                                                 | 1.35  | down | 1.12 | up   | 2.88  | up   | 1.10 | down | 1.77  | up   | 1.16 | up   | ABA |
| Os.25651.1.S1_at   | LOC_Os01g27360 | glutathione S-transferase, putative, expressed                                            | 1.07  | up   | 1.01 | up   | 1.07  | up   | 1.78 | down | 1.50  | up   | 2.30 | up   | JA  |
| Os.25677.1.S1_at   | LOC_Os03g28330 | sucrose synthase, putative, expressed                                                     | 1.06  | up   | 1.01 | down | 2.69  | down | 1.09 | down | 1.31  | down | 1.04 | up   | ABA |
| Os.25687.1.S1_x_at | LOC_Os02g41680 | phenylalanine ammonia-lyase, putative, expressed                                          | 1.04  | down | 1.60 | up   | 2.83  | down | 1.12 | down | 1.84  | down | 1.19 | up   | ABA |
| Os.257.1.S1_at     | LOC_Os04g59380 | ZOS4-14 - C2H2 zinc finger protein, expressed                                             | 1.13  | down | 1.20 | down | 2.71  | down | 1.11 | up   | 1.09  | down | 1.02 | down | ABA |
| Os.25748.1.S1_at   | AF216530       | Oryza sativa ubiquitin RiP-20 mRNA, partial cds.                                          | 1.02  | up   | 1.06 | up   | 2.70  | up   | 1.12 | up   | 1.39  | up   | 1.03 | up   | ABA |
| Os.2580.1.S1_at    | LOC_Os10g33350 | endo-beta-N-acetylglucosaminidase, putative, expressed                                    | 1.05  | down | 1.15 | down | 4.13  | up   | 1.11 | up   | 1.04  | up   | 1.11 | down | ABA |
| Os.25825.1.S1_at   | LOC_Os03g22880 | nucleolar protein 5A, putative, expressed                                                 | 1.02  | up   | 1.14 | up   | 2.00  | down | 1.17 | up   | 1.27  | down | 1.18 | down | ABA |
| Os.25870.2.S1_a_at | LOC_Os02g12870 | expressed protein                                                                         | 1.14  | up   | 1.07 | down | 2.38  | up   | 1.08 | up   | 1.10  | up   | 1.19 | up   | ABA |
| Os.2611.1.S1_a_at  | LOC_Os10g36060 | protein transport protein-related, putative, expressed                                    | 1.33  | down | 1.30 | down | 2.96  | down | 1.47 | down | 1.66  | down | 1.11 | down | ABA |
| Os.2612.1.S1_at    | AF309378       | Oryza sativa (japonica cultivar-group) clone C12112_1A putative glutathione S-transferase | 18.83 | up   | 1.63 | up   | 7.64  | up   | 1.04 | down | 30.03 | up   | 4.45 | up   | 4   |
| Os.26133.1.S1_at   | LOC_Os02g47650 | universal stress protein domain containing protein, putative, expressed                   | 1.53  | down | 1.07 | up   | 2.81  | up   | 1.00 | up   | 2.68  | up   | 1.47 | up   | 2   |
| Os.2615.1.S1_at    | LOC_Os03g01260 | expansin precursor, putative, expressed                                                   | 1.88  | down | 1.04 | up   | 2.05  | down | 1.07 | up   | 1.11  | down | 1.12 | down | ABA |
| Os.2617.2.S1_a_at  | LOC_Os06g48810 | OshKT2;1 - Na+ transporter, expressed                                                     | 1.40  | down | 2.67 | down | 16.29 | up   | 1.87 | up   | 5.02  | up   | 1.58 | down | 3   |
| Os.26261.1.S1_at   | LOC_Os01g65520 | Sad1 / UNC-like C-terminal domain containing protein, putative, expressed                 | 1.37  | up   | 1.03 | up   | 6.91  | up   | 1.02 | up   | 1.49  | up   | 1.14 | up   | ABA |
| Os.26353.1.S1_at   | LOC_Os12g44380 | sucrose transporter, putative, expressed                                                  | 1.24  | up   | 1.33 | down | 3.61  | up   | 1.07 | up   | 1.98  | up   | 1.48 | up   | ABA |
| Os.26359.1.S1_a_at | LOC_Os02g53520 | kinesin motor domain containing protein, putative, expressed                              | 1.03  | up   | 1.01 | down | 2.18  | down | 1.03 | up   | 1.17  | down | 1.11 | down | ABA |
| Os.26367.1.S1_at   | LOC_Os01g58740 | glycerol-3-phosphate dehydrogenase, putative, expressed                                   | 1.33  | up   | 1.23 | up   | 2.81  | up   | 1.07 | up   | 1.24  | up   | 1.95 | up   | ABA |
| Os.26381.1.S1_x_at | LOC_Os07g29600 | zinc finger, C3HC4 type, domain containing protein, expressed                             | 1.24  | up   | 1.15 | up   | 2.04  | down | 1.15 | down | 1.08  | up   | 1.15 | up   | ABA |
| Os.264.1.S1_at     | LOC_Os04g59260 | peroxidase precursor, putative, expressed                                                 | 1.26  | up   | 1.08 | down | 1.52  | down | 1.29 | up   | 2.33  | down | 5.13 | up   | 2   |
| Os.26437.1.A1_s_at | LOC_Os12g40920 | bZIP transcription factor domain containing protein, expressed                            | 1.86  | up   | 1.04 | down | 5.02  | down | 1.19 | up   | 1.67  | down | 1.74 | down | ABA |
| Os.26443.1.S1_at   | LOC_Os01g73040 | CBS domain-containing protein, putative, expressed                                        | 1.11  | up   | 1.13 | down | 2.91  | up   | 1.08 | down | 1.50  | up   | 1.08 | down | ABA |
| Os.26447.1.A1_at   | LOC_Os01g48390 | expressed protein                                                                         | 1.35  | up   | 1.46 | up   | 3.03  | down | 1.28 | up   | 1.20  | down | 1.39 | up   | ABA |
| Os.26458.1.A1_at   | LOC_Os04g58570 | C2 domain containing protein, putative, expressed                                         | 1.09  | down | 1.02 | up   | 3.18  | down | 1.17 | up   | 1.55  | down | 1.46 | down | ABA |
| Os.26471.1.S1_at   | LOC_Os10g39760 | WD domain, G-beta repeat domain containing protein, expressed                             | 1.20  | down | 1.04 | down | 2.67  | up   | 1.07 | up   | 1.45  | up   | 1.00 | up   | ABA |
| Os.26471.2.S1_x_at | LOC_Os10g39760 | WD domain, G beta repeat domain containing protein                                        | 1.00  | up   | 1.00 | down | 2.70  | up   | 1.04 | up   | 1.20  | up   | 1.03 | up   | ABA |
| Os.26472.1.S1_at   | LOC_Os04g40630 | BTBZ4 - Bric-a-Brac, Tramtrack, Broad Complex BTB domain with TAZ zinc finger and         | 1.10  | up   | 1.06 | down | 3.91  | down | 1.38 | up   | 1.46  | up   | 1.82 | up   | ABA |
| Os.26483.1.S1_at   | LOC_Os04g55850 | nuclease PA3, putative, expressed                                                         | 1.49  | down | 1.25 | down | 1.11  | up   | 1.24 | up   | 1.57  | down | 2.31 | up   | JA  |
| Os.26484.1.S1_at   | LOC_Os01g65440 | universal stress protein domain containing protein, putative, expressed                   | 1.26  | up   | 1.05 | down | 2.18  | down | 1.22 | down | 1.26  | down | 1.51 | down | ABA |
| Os.26512.1.S1_at   | LOC_Os03g58350 | OslAA14 - Auxin-responsive Aux/IAA gene family member, expressed                          | 3.29  | up   | 1.11 | up   | 3.70  | down | 1.77 | down | 1.15  | down | 1.13 | down | 2   |
| Os.26517.1.S1_at   | LOC_Os02g44990 | OsFBDUF13 - F-box and DUF domain containing protein, expressed                            | 1.05  | up   | 2.68 | up   | 33.12 | up   | 1.35 | up   | 2.14  | up   | 1.10 | down | 3   |
| Os.26543.1.S1_at   | LOC_Os03g58110 | uncharacterized protein At4g06744 precursor, putative, expressed                          | 1.94  | down | 1.43 | up   | 4.20  | down | 1.18 | up   | 1.42  | down | 1.36 | down | ABA |
| Os.26565.3.S1_at   | LOC_Os01g10320 | class III HD-Zip protein 8, putative, expressed                                           | 1.09  | down | 1.08 | up   | 6.32  | up   | 1.02 | up   | 1.02  | up   | 1.05 | down | ABA |
| Os.26592.1.S2_at   | LOC_Os06g14370 | calceosin related protein, putative, expressed                                            | 1.06  | up   | 1.09 | up   | 2.80  | up   | 1.48 | down | 1.34  | down | 1.49 | down | ABA |
| Os.26629.1.S1_a_at | LOC_Os11g14190 | ARGOS, putative, expressed                                                                | 1.26  | up   | 1.44 | up   | 1.65  | down | 2.02 | up   | 1.02  | down | 1.61 | down | ACC |
| Os.26684.1.S1_at   | LOC_Os02g49760 | potassium transporter, putative, expressed                                                | 1.01  | down | 1.31 | down | 4.18  | up   | 1.07 | up   | 1.23  | up   | 1.21 | up   | ABA |
| Os.26695.1.S1_at   | LOC_Os03g60080 | NAC domain-containing protein 67, putative, expressed                                     | 1.61  | up   | 1.14 | up   | 4.82  | up   | 1.37 | up   | 1.51  | up   | 3.08 | up   | 2   |
| Os.26698.2.S1_at   | LOC_Os08g43300 | UBX domain-containing protein, putative, expressed                                        | 1.23  | down | 1.06 | down | 2.30  | up   | 1.12 | down | 1.39  | up   | 1.01 | down | ABA |

|                    |                |                                                                                      |      |      |      |      |       |      |      |      |      |      |      |      |     |
|--------------------|----------------|--------------------------------------------------------------------------------------|------|------|------|------|-------|------|------|------|------|------|------|------|-----|
| Os.26706.1.S1_at   | LOC_Os07g48229 | vacuolar-sorting receptor precursor, putative, expressed                             | 1.01 | down | 1.14 | up   | 2.70  | up   | 1.22 | up   | 1.03 | up   | 1.02 | up   | ABA |
| Os.26713.1.S1_at   | LOC_Os06g04780 | coiled-coil domain-containing protein 97, putative, expressed                        | 1.02 | up   | 1.13 | up   | 2.02  | up   | 1.14 | up   | 1.34 | up   | 1.15 | up   | ABA |
| Os.26716.1.S1_at   | LOC_Os05g34320 | beta-hexosaminidase precursor, putative, expressed                                   | 1.07 | up   | 1.16 | down | 5.26  | down | 1.17 | down | 1.37 | down | 1.10 | down | ABA |
| Os.26735.1.S1_at   | LOC_Os11g06440 | expressed protein                                                                    | 1.27 | up   | 1.11 | up   | 2.31  | up   | 1.01 | down | 1.02 | down | 1.47 | down | ABA |
| Os.26767.1.A1_at   | LOC_Os11g28104 | TKL_IRAK_DUF26-lf.4 - DUF26 kinases have homology to DUF26 containing loci, expr     | 1.03 | up   | 1.13 | up   | 3.31  | down | 1.06 | down | 1.35 | down | 1.08 | down | ABA |
| Os.2677.1.S1_at    | LOC_Os07g48830 | glycosyl transferase 8 domain containing protein, putative, expressed                | 1.45 | up   | 1.30 | up   | 3.55  | up   | 1.45 | down | 1.73 | up   | 1.09 | down | ABA |
| Os.26775.1.A1_at   | CB656527       | ---                                                                                  | 1.18 | down | 1.36 | down | 10.81 | down | 1.27 | up   | 1.28 | down | 1.67 | down | ABA |
| Os.26787.3.S1_at   | LOC_Os06g36270 | receptor-like protein kinase 5 precursor, putative, expressed                        | 1.17 | down | 1.20 | down | 2.29  | down | 1.21 | up   | 1.25 | down | 1.11 | down | ABA |
| Os.26799.1.A1_at   | LOC_Os07g47590 | expressed protein                                                                    | 1.27 | up   | 1.11 | up   | 3.77  | up   | 1.08 | down | 2.40 | up   | 1.06 | up   | 2   |
| Os.26802.1.S1_at   | LOC_Os12g08130 | amino acid transporter, putative, expressed                                          | 1.58 | down | 1.63 | up   | 2.04  | down | 1.56 | up   | 1.18 | down | 1.25 | down | ABA |
| Os.26816.1.A1_s_at | LOC_Os07g35410 | TKL_IRAK_DUF26-lc.18 - DUF26 kinases have homology to DUF26 containing loci, ex      | 1.17 | down | 1.04 | down | 1.95  | down | 1.42 | up   | 1.03 | up   | 2.55 | up   | JA  |
| Os.26823.1.S1_at   | LOC_Os01g11880 | DJ-1 family protein, putative, expressed                                             | 1.15 | down | 1.03 | up   | 2.89  | up   | 1.17 | up   | 1.14 | up   | 1.17 | up   | ABA |
| Os.26827.1.A1_at   | LOC_Os01g21420 | pre-mRNA-splicing factor SF2, putative, expressed                                    | 1.23 | down | 1.10 | down | 6.50  | up   | 1.04 | up   | 1.83 | up   | 1.03 | down | ABA |
| Os.26827.2.A1_x_at | LOC_Os01g21420 | pre-mRNA-splicing factor SF2, putative, expressed                                    | 1.03 | up   | 1.05 | down | 4.53  | up   | 1.26 | down | 1.30 | up   | 1.01 | up   | ABA |
| Os.26830.1.S1_at   | LOC_Os07g33440 | cytochrome P450, putative, expressed                                                 | 1.27 | down | 1.22 | up   | 3.37  | down | 1.45 | up   | 1.34 | up   | 1.49 | up   | ABA |
| Os.26831.1.A1_a_at | AK241507       | ceramide kinase-related                                                              | 1.25 | up   | 1.17 | down | 4.92  | up   | 1.07 | up   | 1.81 | up   | 1.30 | up   | ABA |
| Os.26835.1.A1_at   | LOC_Os10g16930 | hypothetical protein                                                                 | 1.24 | up   | 1.00 | down | 2.82  | up   | 1.16 | down | 1.13 | up   | 1.10 | down | ABA |
| Os.2685.1.S1_at    | LOC_Os01g68790 | RNA recognition motif containing protein, putative, expressed                        | 1.08 | up   | 1.02 | up   | 2.34  | down | 1.09 | up   | 1.31 | down | 1.08 | down | ABA |
| Os.26856.1.S1_at   | LOC_Os07g16970 | rab GDP dissociation inhibitor alpha, putative, expressed                            | 1.15 | up   | 1.12 | up   | 8.75  | up   | 1.00 | down | 1.48 | up   | 1.25 | up   | ABA |
| Os.26859.1.S1_at   | LOC_Os10g11354 | MATE efflux family protein, putative, expressed                                      | 1.43 | up   | 1.16 | down | 1.22  | up   | 1.44 | up   | 3.01 | up   | 2.00 | up   | SA  |
| Os.26864.1.S1_at   | LOC_Os01g56350 | PTAC12, putative, expressed                                                          | 1.05 | down | 1.08 | down | 2.53  | down | 1.17 | down | 1.40 | down | 1.31 | down | ABA |
| Os.26864.2.S1_x_at | LOC_Os01g56350 | PTAC12, putative, expressed                                                          | 1.17 | up   | 1.02 | down | 2.14  | down | 1.06 | down | 1.41 | down | 1.01 | down | ABA |
| Os.26868.1.A1_at   | LOC_Os03g10100 | transporter family protein, putative, expressed                                      | 1.09 | down | 1.29 | up   | 2.21  | up   | 1.82 | down | 1.15 | down | 1.53 | down | ABA |
| Os.26907.1.S1_at   | LOC_Os02g17710 | receptor-like protein kinase 5 precursor, putative, expressed                        | 1.34 | down | 1.05 | down | 2.52  | down | 1.32 | up   | 1.40 | down | 1.22 | down | ABA |
| Os.26908.1.A1_at   | LOC_Os04g54500 | POLGAMMA2, putative, expressed                                                       | 1.13 | up   | 1.02 | up   | 2.02  | down | 1.09 | down | 1.34 | down | 1.20 | down | ABA |
| Os.26914.1.S1_at   | LOC_Os07g35330 | TKL_IRAK_DUF26-lc.13 - DUF26 kinases have homology to DUF26 containing loci, ex      | 1.19 | up   | 1.19 | down | 4.24  | down | 2.77 | up   | 2.11 | up   | 2.72 | up   | 4   |
| Os.26915.1.A1_at   | LOC_Os11g45050 | NBS-LRR disease resistance protein, putative, expressed                              | 1.02 | down | 1.09 | down | 2.43  | down | 1.48 | up   | 1.06 | down | 1.06 | up   | ABA |
| Os.26930.1.S1_x_at | LOC_Os04g06590 | expressed protein                                                                    | 1.02 | up   | 1.00 | down | 1.01  | down | 1.04 | up   | 3.13 | up   | 1.04 | up   | SA  |
| Os.26933.1.S1_x_at | LOC_Os10g34840 | RIPER6 - Ripening-related family protein precursor, expressed                        | 1.47 | down | 1.20 | up   | 14.73 | down | 2.59 | up   | 2.59 | down | 1.65 | down | 3   |
| Os.26933.2.S1_x_at | LOC_Os10g34840 | RIPER6 - Ripening-related family protein precursor, expressed                        | 1.63 | down | 1.28 | up   | 12.36 | down | 2.47 | up   | 2.58 | down | 1.54 | down | 3   |
| Os.26938.1.A1_at   | LOC_Os02g42150 | OsWAK14 - OsWAK receptor-like protein kinase, expressed                              | 2.50 | up   | 1.11 | up   | 6.23  | down | 1.42 | down | 1.13 | down | 1.06 | up   | 2   |
| Os.2694.1.S1_at    | LOC_Os04g43200 | calcosin related protein, putative, expressed                                        | 1.04 | up   | 1.05 | down | 28.46 | up   | 1.07 | down | 1.66 | up   | 1.20 | up   | ABA |
| Os.26941.1.A1_at   | LOC_Os05g07420 | S-domain receptor-like protein kinase, putative, expressed                           | 1.68 | down | 1.49 | up   | 15.22 | down | 1.48 | up   | 2.06 | down | 1.99 | down | 2   |
| Os.26945.1.S1_at   | LOC_Os12g17090 | stripe rust resistance protein Yr10, putative, expressed                             | 1.52 | up   | 1.41 | up   | 3.56  | down | 1.05 | down | 1.40 | down | 1.25 | down | ABA |
| Os.2696.1.S1_at    | LOC_Os04g15840 | expansin precursor, putative, expressed                                              | 1.57 | up   | 1.29 | up   | 1.52  | up   | 2.51 | down | 2.03 | down | 1.10 | down | 2   |
| Os.26967.1.S1_a_at | LOC_Os01g50616 | phosphatidylinositol transfer, putative, expressed                                   | 1.21 | up   | 1.20 | down | 7.96  | up   | 1.06 | down | 1.38 | up   | 1.14 | up   | ABA |
| Os.26967.1.S2_at   | LOC_Os01g50616 | phosphatidylinositol transfer, putative, expressed                                   | 1.14 | down | 1.37 | down | 14.02 | up   | 1.22 | down | 1.34 | up   | 1.11 | up   | ABA |
| Os.26968.1.S1_at   | LOC_Os06g30179 | cytochrome P450, putative, expressed                                                 | 1.19 | up   | 1.06 | down | 11.83 | up   | 1.58 | down | 1.79 | up   | 1.58 | down | ABA |
| Os.26972.1.S1_at   | LOC_Os09g38960 | potassium transporter, putative, expressed                                           | 1.13 | up   | 1.04 | up   | 2.49  | up   | 1.07 | down | 1.14 | up   | 1.51 | up   | ABA |
| Os.26979.1.S1_x_at | LOC_Os12g29950 | nodulin, putative, expressed                                                         | 1.46 | down | 1.82 | up   | 2.47  | down | 1.17 | down | 1.42 | down | 1.01 | down | ABA |
| Os.27019.1.S1_at   | LOC_Os04g43410 | Os4bglu18 - monoglucosylated beta-glucoside homologue, expressed                     | 1.12 | up   | 1.45 | up   | 2.62  | up   | 1.39 | down | 1.04 | up   | 1.18 | up   | ABA |
| Os.27027.1.S1_at   | LOC_Os09g32010 | ternary complex factor MIP1, putative, expressed                                     | 1.05 | down | 1.04 | down | 3.01  | up   | 1.17 | down | 1.21 | up   | 1.04 | down | ABA |
| Os.27028.1.A1_at   | LOC_Os05g41580 | calcium-transporting ATPase, plasma membrane-type, putative, expressed               | 1.01 | down | 1.14 | down | 3.48  | down | 1.47 | up   | 1.24 | down | 1.51 | down | ABA |
| Os.27035.1.S1_s_at | LOC_Os01g38229 | peptidyl-prolyl isomerase, putative, expressed                                       | 1.22 | up   | 1.07 | down | 4.74  | down | 1.14 | up   | 1.35 | down | 1.05 | down | ABA |
| Os.27035.2.S1_s_at | LOC_Os01g38229 | peptidyl-prolyl isomerase, putative, expressed                                       | 1.53 | up   | 1.07 | up   | 4.69  | down | 1.04 | up   | 1.35 | down | 1.03 | up   | ABA |
| Os.27041.1.S1_at   | LOC_Os02g54580 | serine esterase family protein, putative, expressed                                  | 1.00 | down | 1.05 | down | 2.19  | up   | 1.12 | up   | 1.20 | up   | 1.33 | up   | ABA |
| Os.27043.1.A1_at   | LOC_Os05g03920 | TKL_IRAK_DUF26-lf.3 - DUF26 kinases have homology to DUF26 containing loci, expr     | 1.38 | up   | 1.32 | up   | 24.27 | up   | 2.93 | up   | 1.86 | up   | 3.25 | up   | 3   |
| Os.27053.3.A1_s_at | LOC_Os11g07200 | receptor protein kinase CLAVATA1 precursor, putative, expressed                      | 1.00 | up   | 1.16 | down | 1.74  | down | 2.35 | up   | 1.28 | down | 1.13 | down | ACC |
| Os.27067.2.A1_at   | LOC_Os08g02230 | FAD-binding and arabino-lactone oxidase domains containing protein, putative, expres | 1.43 | down | 1.03 | up   | 3.22  | down | 1.09 | up   | 1.20 | down | 1.71 | up   | ABA |
| Os.27081.1.A1_at   | LOC_Os02g06570 | CAMK_KIN1/SNF1/Nim1_like.13 - CAMK includes calcium/calmodulin dependent protei      | 1.08 | up   | 1.05 | up   | 2.71  | up   | 1.20 | down | 1.24 | up   | 1.05 | down | ABA |
| Os.27084.1.A1_a_at | LOC_Os04g52640 | SHR5-receptor-like kinase, putative, expressed                                       | 2.07 | down | 1.17 | down | 3.26  | down | 1.28 | up   | 1.28 | down | 1.42 | down | 2   |
| Os.27084.2.S1_a_at | LOC_Os04g52640 | SHR5-receptor-like kinase, putative, expressed                                       | 1.62 | down | 1.22 | down | 7.00  | down | 1.33 | up   | 1.48 | down | 1.45 | down | ABA |
| Os.27095.1.A1_at   | LOC_Os02g21460 | uncharacterized protein yqjG, putative, expressed                                    | 1.33 | up   | 1.05 | up   | 1.26  | down | 1.37 | up   | 2.40 | up   | 1.80 | up   | SA  |
| Os.27112.1.S1_at   | LOC_Os01g09800 | BTBA1 - Bric-a-Brac, Tramtrack, Broad Complex BTB domain with Ankyrin repeat regio   | 1.01 | up   | 1.21 | down | 1.91  | down | 1.36 | up   | 1.24 | up   | 4.51 | up   | JA  |
| Os.27118.1.A1_at   | LOC_Os06g44050 | methyladenine glycosylase, putative, expressed                                       | 2.24 | up   | 1.04 | up   | 1.63  | down | 1.03 | down | 1.18 | down | 1.07 | up   | IAA |



|                    |                |                                                                                    |      |      |      |      |       |      |      |      |      |      |      |      |     |
|--------------------|----------------|------------------------------------------------------------------------------------|------|------|------|------|-------|------|------|------|------|------|------|------|-----|
| Os.27119.1.S1_at   | LOC_Os02g55120 | translation initiation factor IF-3, putative, expressed                            | 1.11 | up   | 1.03 | up   | 2.94  | down | 1.22 | down | 1.58 | down | 1.46 | down | ABA |
| Os.27144.1.S1_at   | AK065548       | leucine-rich repeat family protein                                                 | 1.15 | up   | 1.10 | up   | 4.33  | down | 1.07 | down | 1.12 | down | 1.19 | down | ABA |
| Os.27145.1.S1_at   | LOC_Os01g59100 | cytokinin-N-glucosyltransferase 1, putative, expressed                             | 1.18 | down | 1.10 | up   | 6.99  | up   | 1.01 | up   | 3.56 | up   | 1.27 | up   | 2   |
| Os.27161.1.S1_at   | LOC_Os01g47460 | expressed protein                                                                  | 1.27 | up   | 1.08 | down | 3.93  | up   | 1.10 | up   | 2.09 | up   | 1.40 | up   | 2   |
| Os.27166.1.A1_s_at | LOC_Os03g04130 | AMP-binding domain containing protein, expressed                                   | 1.37 | down | 1.03 | down | 2.74  | up   | 1.08 | up   | 1.02 | down | 1.28 | down | ABA |
| Os.27169.1.S1_s_at | LOC_Os01g68740 | keratin, type I cytoskeletal 9, putative, expressed                                | 1.77 | down | 1.38 | up   | 40.28 | down | 1.14 | down | 3.21 | down | 1.34 | down | 2   |
| Os.27170.1.S1_at   | LOC_Os01g50400 | STE_MEKK_ste11_MAP3K.5 - STE kinases include homologs to sterile 7, sterile 11 an  | 1.46 | up   | 1.09 | up   | 56.64 | up   | 1.40 | up   | 1.33 | up   | 1.84 | up   | ABA |
| Os.27176.1.S1_at   | LOC_Os09g28354 | CPuORF39 - conserved peptide uORF-containing transcript, expressed                 | 1.02 | up   | 1.08 | up   | 4.27  | up   | 1.13 | down | 1.35 | up   | 1.13 | up   | ABA |
| Os.27178.1.S1_s_at | LOC_Os04g54474 | transcription factor, putative, expressed                                          | 1.24 | up   | 3.27 | down | 1.28  | up   | 1.02 | down | 1.20 | up   | 1.07 | down | BAP |
| Os.27182.1.A1_at   | LOC_Os02g43150 | GATA zinc finger domain containing protein, expressed                              | 1.02 | up   | 1.05 | up   | 2.29  | up   | 1.20 | up   | 1.01 | down | 1.04 | up   | ABA |
| Os.27185.1.S1_x_at | LOC_Os07g35750 | TKL_IRAK_DUF26-ld.3 - DUF26 kinases have homology to DUF26 containing loci, exp    | 1.39 | down | 1.13 | down | 2.81  | down | 1.63 | up   | 1.06 | down | 1.29 | up   | ABA |
| Os.27193.1.S1_at   | LOC_Os02g58510 | GHMP kinases ATP-binding protein, putative                                         | 1.03 | up   | 1.02 | down | 2.01  | down | 1.22 | up   | 1.04 | down | 1.35 | up   | ABA |
| Os.27198.1.S1_at   | LOC_Os02g15690 | polygalacturonase, putative, expressed                                             | 1.05 | down | 1.11 | up   | 3.29  | down | 1.25 | down | 1.37 | down | 1.50 | down | ABA |
| Os.27205.1.S1_at   | LOC_Os06g48180 | glycosyl hydrolases family 16, putative, expressed                                 | 1.06 | down | 1.24 | down | 3.70  | up   | 1.44 | down | 1.08 | up   | 1.81 | down | ABA |
| Os.27207.1.S1_at   | LOC_Os12g25200 | chloride transporter, chloride channel family, putative, expressed                 | 1.10 | down | 1.23 | up   | 1.92  | up   | 1.39 | down | 1.31 | down | 2.03 | down | JA  |
| Os.27218.1.A1_at   | LOC_Os05g49940 | expressed protein                                                                  | 1.04 | down | 1.36 | up   | 19.91 | up   | 1.17 | up   | 1.39 | up   | 1.27 | down | ABA |
| Os.27220.2.A1_a_at | EU563917       | Oryza sativa Japonica Group Pri-miR1850_1, complete sequence.                      | 1.04 | up   | 1.01 | down | 2.20  | down | 1.18 | up   | 1.07 | up   | 1.00 | down | ABA |
| Os.27227.1.S1_at   | LOC_Os09g16510 | OsWRKY74 - Superfamily of TFs having WRKY and zinc finger domains, expressed       | 1.65 | down | 2.40 | up   | 7.35  | down | 1.87 | up   | 1.62 | down | 1.56 | up   | 2   |
| Os.27230.1.A1_at   | LOC_Os12g05330 | protein of unknown function containing protein, expressed                          | 1.38 | up   | 1.07 | down | 39.34 | up   | 1.01 | down | 1.17 | up   | 1.03 | up   | ABA |
| Os.27232.1.S1_at   | LOC_Os01g68650 | plant-specific domain TIGR01615 family protein, expressed                          | 1.17 | up   | 1.64 | up   | 5.36  | up   | 1.41 | up   | 1.36 | up   | 1.59 | up   | ABA |
| Os.27238.1.S1_at   | LOC_Os10g28970 | BTB6 - Bric-a-Brac, Tramtrack, Broad Complex BTB domain, expressed                 | 2.25 | down | 2.78 | up   | 1.79  | down | 1.52 | up   | 2.95 | down | 2.15 | down | 4   |
| Os.27247.1.S1_at   | LOC_Os06g50950 | GDSL-like lipase/acylhydrolase, putative, expressed                                | 1.06 | up   | 1.92 | up   | 7.28  | down | 1.41 | up   | 2.99 | down | 3.07 | up   | 3   |
| Os.27251.1.S1_at   | LOC_Os04g10350 | 1-aminocyclopropane-1-carboxylate oxidase homolog 2, putative, expressed           | 1.14 | down | 2.41 | up   | 1.06  | down | 1.31 | up   | 1.11 | down | 3.54 | up   | 2   |
| Os.27255.2.S1_x_at | LOC_Os06g50390 | eukaryotic aspartyl protease domain containing protein, expressed                  | 1.14 | up   | 1.22 | down | 2.96  | up   | 1.20 | up   | 1.16 | up   | 1.23 | down | ABA |
| Os.27277.1.A1_at   | AK241848       | expressed protein                                                                  | 1.02 | down | 1.06 | up   | 2.72  | up   | 1.13 | up   | 1.54 | up   | 1.30 | up   | ABA |
| Os.27292.1.A1_at   | LOC_Os04g44354 | UDP-glucuronosyl and UDP-glucosyl transferase domain containing protein, expressed | 1.16 | down | 1.18 | down | 19.14 | down | 2.55 | up   | 1.35 | down | 7.17 | up   | 3   |
| Os.27299.1.A1_at   | LOC_Os01g04800 | B3 DNA binding domain containing protein, expressed                                | 1.72 | down | 1.11 | down | 3.13  | down | 1.84 | up   | 1.02 | up   | 1.42 | up   | ABA |
| Os.27307.1.S1_at   | AK241912       | Oryza sativa Japonica Group cDNA, clone: J075062C10, full insert sequence.         | 1.21 | down | 1.12 | up   | 5.23  | up   | 1.19 | down | 1.01 | up   | 1.03 | up   | ABA |
| Os.27323.1.S1_at   | LOC_Os01g22600 | mitochondrial carrier protein, putative, expressed                                 | 1.32 | up   | 1.04 | up   | 3.33  | up   | 1.01 | up   | 1.40 | up   | 1.14 | up   | ABA |
| Os.27323.2.S1_x_at | LOC_Os01g22600 | mitochondrial carrier protein, putative, expressed                                 | 1.29 | up   | 1.04 | up   | 3.10  | up   | 1.02 | down | 1.28 | up   | 1.25 | up   | ABA |
| Os.27330.1.A1_at   | LOC_Os04g49160 | zinc finger, C3HC4 type domain containing protein, expressed                       | 1.07 | up   | 1.40 | down | 2.08  | down | 1.77 | up   | 1.03 | up   | 4.23 | up   | 2   |
| Os.27354.1.S1_at   | LOC_Os09g17600 | membrane protein, putative, expressed                                              | 1.35 | down | 1.03 | up   | 3.48  | down | 1.47 | down | 1.52 | down | 1.13 | up   | ABA |
| Os.27355.1.A1_at   | LOC_Os02g39400 | isochorismatase family protein, putative, expressed                                | 1.05 | down | 1.10 | down | 2.10  | down | 1.52 | up   | 1.12 | up   | 1.02 | up   | ABA |
| Os.27359.1.S1_at   | LOC_Os08g20660 | sucrose-phosphate synthase, putative, expressed                                    | 1.03 | down | 1.13 | down | 2.90  | up   | 1.04 | up   | 1.15 | up   | 1.05 | down | ABA |
| Os.27382.2.S1_at   | LOC_Os02g02110 | Alg9-like mannosyltransferase protein, putative, expressed                         | 1.02 | down | 1.05 | down | 16.75 | down | 1.49 | up   | 1.78 | down | 2.79 | down | 2   |
| Os.27383.2.S1_at   | LOC_Os03g48710 | expressed protein                                                                  | 1.22 | down | 1.07 | down | 3.30  | up   | 1.10 | up   | 1.89 | up   | 1.50 | up   | ABA |
| Os.27395.1.S1_a_at | LOC_Os04g57760 | expressed protein                                                                  | 1.30 | up   | 1.53 | up   | 3.52  | up   | 1.10 | up   | 1.44 | up   | 1.40 | up   | ABA |
| Os.27414.2.S1_x_at | LOC_Os07g39590 | spotted leaf 11, putative, expressed                                               | 1.28 | up   | 1.02 | down | 2.24  | up   | 1.07 | down | 1.03 | down | 1.04 | down | ABA |
| Os.27417.1.S1_at   | LOC_Os01g52170 | expressed protein                                                                  | 1.28 | up   | 1.18 | down | 7.34  | down | 1.51 | down | 2.71 | down | 1.88 | down | 2   |
| Os.27430.1.S1_at   | AK240684       | probable cinnamoyl-CoA reductase                                                   | 1.40 | up   | 1.21 | down | 4.01  | up   | 1.38 | down | 1.23 | up   | 1.22 | down | ABA |
| Os.27431.1.A1_at   | LOC_Os07g35310 | TKL_IRAK_DUF26-1c.12 - DUF26 kinases have homology to DUF26 containing loci, ex    | 1.07 | down | 1.01 | down | 3.33  | down | 2.49 | up   | 1.13 | up   | 2.29 | up   | 3   |
| Os.27438.1.S1_a_at | LOC_Os08g05320 | expressed protein                                                                  | 1.04 | up   | 1.15 | down | 5.68  | up   | 1.31 | up   | 1.99 | up   | 1.15 | up   | ABA |
| Os.27438.2.S1_x_at | LOC_Os08g05320 | expressed protein                                                                  | 1.06 | down | 1.11 | down | 3.73  | up   | 1.10 | up   | 1.40 | up   | 1.14 | up   | ABA |
| Os.27439.2.S1_at   | LOC_Os05g34854 | gibberellin 20 oxidase 2, putative, expressed                                      | 1.04 | down | 1.27 | up   | 4.60  | down | 1.65 | up   | 3.80 | down | 2.28 | down | 3   |
| Os.27446.1.S1_a_at | LOC_Os03g62580 | vacuolar sorting protein, putative, expressed                                      | 1.05 | up   | 1.11 | down | 2.72  | up   | 1.09 | down | 1.28 | up   | 1.01 | up   | ABA |
| Os.27446.2.S1_at   | AK065755       | vacuolar sorting protein 9 domain-containing protein                               | 1.12 | down | 1.02 | down | 3.39  | up   | 1.40 | up   | 1.30 | up   | 1.15 | up   | ABA |
| Os.27446.3.S1_x_at | AK065755       | vacuolar sorting protein 9 domain-containing protein                               | 1.03 | down | 1.15 | down | 2.61  | up   | 1.02 | up   | 1.16 | up   | 1.08 | up   | ABA |
| Os.27451.1.S1_at   | LOC_Os06g46670 | glutamate receptor, putative, expressed                                            | 1.41 | down | 1.33 | down | 3.25  | down | 1.16 | down | 1.49 | down | 1.56 | up   | ABA |
| Os.27489.1.A1_at   | LOC_Os01g11120 | CID11, putative, expressed                                                         | 1.00 | up   | 1.06 | up   | 2.09  | down | 1.05 | down | 1.32 | down | 1.15 | up   | ABA |
| Os.27494.1.S1_at   | LOC_Os07g41200 | expressed protein                                                                  | 2.80 | up   | 1.12 | up   | 2.70  | down | 1.20 | up   | 1.47 | up   | 1.28 | down | 2   |
| Os.27497.1.S1_at   | LOC_Os12g12390 | transposon protein, putative, CACTA, En                                            | 4.87 | down | 5.65 | up   | 6.54  | down | 1.23 | up   | 6.30 | down | 6.06 | down | 5   |
| Os.27502.1.S1_at   | AK067679       | Oryza sativa Japonica Group cDNA clone:J013114G19, full insert sequence.           | 1.00 | down | 1.08 | up   | 2.38  | up   | 1.37 | up   | 1.43 | up   | 1.34 | up   | ABA |
| Os.27506.1.A1_at   | LOC_Os11g15340 | SAM dependent carboxyl methyltransferase family protein, putative, expressed       | 2.17 | down | 1.14 | down | 2.73  | down | 1.00 | down | 1.50 | down | 1.16 | up   | 2   |
| Os.27507.1.S1_at   | LOC_Os06g35700 | reticuline oxidase-like protein precursor, putative, expressed                     | 1.46 | down | 1.52 | up   | 1.99  | down | 1.79 | up   | 1.46 | up   | 3.04 | up   | JA  |
| Os.27522.2.S1_at   | LOC_Os03g58330 | BHLH transcription factor, putative, expressed                                     | 1.16 | up   | 1.19 | up   | 3.19  | down | 1.43 | down | 1.42 | down | 1.83 | down | ABA |

|                    |                |                                                                                   |      |      |      |      |       |      |      |      |      |      |      |      |     |
|--------------------|----------------|-----------------------------------------------------------------------------------|------|------|------|------|-------|------|------|------|------|------|------|------|-----|
| Os.27524.2.S1_at   | LOC_Os09g16920 | desaturase/cytochrome b5 protein, putative, expressed                             | 1.17 | up   | 1.02 | down | 3.95  | down | 1.61 | down | 1.81 | down | 1.52 | down | ABA |
| Os.27525.1.A1_at   | LOC_Os09g27500 | cytochrome P450, putative, expressed                                              | 1.17 | up   | 1.93 | up   | 10.71 | down | 1.13 | up   | 4.15 | down | 4.00 | down | 3   |
| Os.27538.1.S1_at   | LOC_Os12g17430 | NBS-LRR disease resistance protein, putative, expressed                           | 1.01 | down | 1.66 | up   | 1.78  | down | 1.02 | down | 1.55 | down | 3.21 | up   | JA  |
| Os.27552.1.S1_a_at | LOC_Os08g06230 | nucleolar GTP-binding protein 1, putative, expressed                              | 1.16 | up   | 1.11 | up   | 2.49  | down | 1.19 | down | 1.34 | down | 1.17 | down | ABA |
| Os.27564.1.S1_a_at | LOC_Os01g52540 | B3 DNA binding domain containing protein, expressed                               | 1.16 | down | 1.28 | up   | 5.90  | down | 1.03 | up   | 1.88 | down | 1.60 | up   | ABA |
| Os.27569.1.S2_at   | LOC_Os09g30490 | EF hand family protein, expressed                                                 | 1.56 | up   | 1.40 | up   | 2.31  | up   | 1.06 | up   | 5.72 | up   | 1.93 | up   | 2   |
| Os.27573.1.S1_at   | LOC_Os11g35320 | BSD domain-containing protein, putative, expressed                                | 1.08 | up   | 1.13 | down | 2.45  | up   | 1.19 | up   | 1.23 | up   | 1.07 | up   | ABA |
| Os.27577.1.S1_at   | LOC_Os01g04880 | retrotransposon protein, putative, unclassified, expressed                        | 1.08 | up   | 1.02 | up   | 2.42  | down | 1.13 | down | 1.39 | down | 1.35 | down | ABA |
| Os.27580.1.S1_at   | LOC_Os07g37230 | inositol-1-monophosphatase, putative, expressed                                   | 1.03 | up   | 1.86 | up   | 21.55 | down | 1.71 | down | 4.07 | down | 1.15 | down | 2   |
| Os.27587.1.S1_at   | LOC_Os10g40740 | helix-loop-helix DNA-binding domain containing protein, expressed                 | 1.03 | up   | 1.28 | up   | 2.93  | down | 1.20 | up   | 1.16 | down | 1.00 | up   | ABA |
| Os.27591.1.S1_s_at | LOC_Os10g42299 | mitochondrial carrier protein, putative, expressed                                | 1.37 | up   | 1.14 | down | 5.45  | down | 1.28 | down | 1.76 | down | 1.37 | down | ABA |
| Os.27591.1.A1_at   | LOC_Os04g12499 | amino acid transporter protein, putative, expressed                               | 1.34 | up   | 1.51 | down | 5.65  | up   | 1.54 | down | 1.15 | up   | 1.41 | down | ABA |
| Os.27606.1.S1_at   | LOC_Os03g63330 | aspartokinase, chloroplast precursor, putative, expressed                         | 1.19 | down | 1.09 | up   | 5.43  | down | 1.26 | down | 1.25 | down | 1.09 | down | ABA |
| Os.27611.1.S1_s_at | LOC_Os04g10214 | expressed protein                                                                 | 1.34 | down | 1.13 | down | 2.80  | down | 1.19 | up   | 1.48 | down | 1.02 | down | ABA |
| Os.27612.1.S1_at   | LOC_Os08g01150 | DTA2, putative, expressed                                                         | 1.04 | down | 1.11 | down | 3.37  | up   | 1.20 | down | 1.56 | up   | 1.17 | up   | ABA |
| Os.27624.1.S1_at   | LOC_Os03g14590 | calcium-binding EF hand family protein, putative, expressed                       | 1.12 | up   | 1.22 | down | 2.37  | up   | 1.32 | down | 1.12 | down | 1.20 | up   | ABA |
| Os.27640.1.A1_s_at | LOC_Os12g36680 | expressed protein                                                                 | 1.15 | down | 1.04 | up   | 5.13  | up   | 1.29 | up   | 1.06 | up   | 2.61 | up   | 2   |
| Os.27660.1.S1_at   | LOC_Os05g48210 | expressed protein                                                                 | 2.15 | down | 1.40 | down | 4.89  | down | 1.16 | down | 1.67 | down | 1.76 | down | 2   |
| Os.27671.1.S1_at   | LOC_Os03g17470 | IN2-1 protein, putative, expressed                                                | 2.27 | up   | 1.02 | down | 1.50  | up   | 1.08 | up   | 2.98 | up   | 1.78 | up   | 2   |
| Os.27673.1.S1_at   | LOC_Os03g14730 | gibberellin receptor GID1L2, putative, expressed                                  | 1.00 | up   | 1.04 | down | 5.24  | down | 1.29 | up   | 1.23 | down | 1.49 | up   | ABA |
| Os.27694.1.S1_at   | LOC_Os02g46750 | expressed protein                                                                 | 1.05 | up   | 1.10 | up   | 2.46  | down | 1.21 | down | 1.36 | down | 1.36 | down | ABA |
| Os.27696.1.S1_at   | LOC_Os11g25260 | nucleoside-triphosphatase, putative, expressed                                    | 1.11 | down | 1.01 | up   | 2.64  | down | 1.03 | up   | 1.38 | down | 1.56 | up   | ABA |
| Os.27701.1.A1_at   | LOC_Os07g45000 | cytochrome P450, putative, expressed                                              | 1.05 | down | 1.20 | down | 4.54  | up   | 1.12 | down | 1.52 | up   | 1.39 | up   | ABA |
| Os.27703.1.S1_a_at | LOC_Os09g13650 | microtubule-associated protein, putative, expressed                               | 1.01 | down | 1.13 | down | 12.15 | down | 1.14 | down | 1.34 | down | 1.41 | up   | ABA |
| Os.27703.1.S1_s_at | LOC_Os09g13650 | microtubule-associated protein, putative, expressed                               | 1.26 | up   | 1.01 | up   | 11.78 | down | 1.20 | down | 1.39 | down | 1.14 | up   | ABA |
| Os.27712.2.S1_x_at | LOC_Os06g48510 | choline monooxygenase, chloroplast precursor, putative, expressed                 | 1.02 | up   | 1.06 | up   | 2.16  | up   | 1.09 | up   | 1.33 | up   | 1.35 | down | ABA |
| Os.27730.1.S1_at   | LOC_Os08g37700 | RNA recognition motif containing protein, putative, expressed                     | 1.18 | up   | 1.17 | up   | 2.37  | down | 1.33 | down | 1.71 | down | 1.40 | down | ABA |
| Os.27755.1.S1_at   | LOC_Os07g35560 | glucan endo-1,3-beta-glucosidase precursor, putative, expressed                   | 1.90 | down | 1.45 | up   | 2.94  | down | 1.55 | up   | 1.85 | down | 1.57 | up   | ABA |
| Os.27756.1.S1_at   | LOC_Os06g49640 | uncharacterized UPF0114 domain containing protein, expressed                      | 1.43 | up   | 1.62 | down | 2.37  | up   | 1.51 | up   | 1.30 | up   | 1.45 | down | ABA |
| Os.27767.1.S1_s_at | LOC_Os04g29680 | OsWAK38 - OsWAK receptor-like protein kinase, expressed                           | 1.13 | down | 1.26 | down | 2.82  | down | 2.49 | up   | 1.94 | up   | 1.69 | down | 2   |
| Os.27773.1.S1_at   | LOC_Os04g52600 | SHR5-receptor-like kinase, putative, expressed                                    | 1.23 | down | 1.17 | down | 2.39  | down | 1.45 | up   | 1.04 | down | 1.43 | up   | ABA |
| Os.27788.1.S1_at   | LOC_Os06g41450 | VQ domain containing protein, putative, expressed                                 | 1.10 | down | 1.51 | down | 3.27  | down | 1.56 | up   | 1.24 | up   | 1.38 | down | ABA |
| Os.27789.1.A1_at   | LOC_Os06g20150 | peroxidase precursor, putative, expressed                                         | 1.82 | down | 1.34 | down | 9.04  | down | 1.43 | up   | 2.21 | down | 2.30 | down | 3   |
| Os.27796.1.A1_at   | LOC_Os07g26210 | non-lysosomal glucosylceramidase, putative, expressed                             | 1.22 | up   | 1.18 | up   | 3.16  | up   | 1.19 | up   | 1.11 | up   | 1.18 | up   | ABA |
| Os.27802.1.S1_s_at | LOC_Os02g43850 | serine esterase family protein, putative, expressed                               | 1.04 | up   | 1.11 | up   | 2.80  | up   | 1.04 | down | 1.09 | up   | 1.14 | down | ABA |
| Os.27804.1.S1_at   | LOC_Os08g10310 | SHR5-receptor-like kinase, putative, expressed                                    | 1.02 | down | 1.93 | up   | 9.09  | down | 2.62 | up   | 1.75 | down | 1.01 | down | 2   |
| Os.27820.1.S1_at   | LOC_Os01g43410 | CAMK_CAMK_like.9 - CAMK includes calcium/calmodulin dependent protein kinases, ex | 1.10 | down | 1.19 | down | 2.63  | down | 1.02 | up   | 1.50 | down | 1.46 | down | ABA |
| Os.27822.2.S1_at   | LOC_Os04g47520 | growth regulator related protein, putative, expressed                             | 1.24 | down | 1.09 | down | 3.33  | up   | 1.04 | down | 1.17 | up   | 1.37 | up   | ABA |
| Os.27837.1.S1_at   | LOC_Os06g37450 | GATA zinc finger domain containing protein, expressed                             | 1.06 | down | 1.81 | up   | 3.97  | down | 1.13 | down | 2.07 | down | 3.38 | down | 3   |
| Os.27837.2.S1_x_at | LOC_Os06g37450 | GATA zinc finger domain containing protein, expressed                             | 1.02 | down | 1.75 | up   | 3.79  | down | 1.11 | up   | 1.46 | down | 1.72 | down | ABA |
| Os.27860.1.A1_at   | LOC_Os01g53710 | dual specificity protein phosphatase, putative, expressed                         | 1.30 | down | 1.28 | down | 1.97  | up   | 1.09 | up   | 1.18 | up   | 3.02 | up   | JA  |
| Os.27874.2.S1_x_at | LOC_Os05g48840 | expressed protein                                                                 | 1.00 | down | 1.16 | up   | 4.88  | up   | 1.06 | down | 1.52 | down | 1.40 | down | ABA |
| Os.27875.1.S1_at   | LOC_Os10g28120 | glycosyl hydrolase, putative, expressed                                           | 1.47 | down | 2.74 | up   | 3.58  | up   | 1.11 | down | 1.15 | up   | 1.58 | down | 2   |
| Os.27906.1.S1_a_at | LOC_Os01g62760 | protein phosphatase 2C, putative, expressed                                       | 2.21 | up   | 1.20 | down | 25.53 | up   | 1.38 | down | 3.43 | up   | 1.63 | up   | 3   |
| Os.27914.1.S1_at   | LOC_Os08g02390 | RNA recognition motif containing protein, putative, expressed                     | 1.22 | up   | 1.27 | up   | 3.58  | down | 1.14 | down | 1.49 | down | 1.07 | down | ABA |
| Os.27918.1.A1_at   | LOC_Os03g05530 | nodulin, putative, expressed                                                      | 1.62 | down | 1.02 | down | 28.27 | down | 1.22 | down | 3.39 | down | 1.60 | down | 2   |
| Os.27926.1.A1_s_at | LOC_Os07g48460 | stress responsive protein, putative, expressed                                    | 1.12 | up   | 1.10 | up   | 3.37  | up   | 1.05 | down | 1.03 | up   | 1.14 | down | ABA |
| Os.27932.1.S1_at   | LOC_Os01g68580 | LTP38 - Protease inhibitor/seed storage/LTP family protein precursor, expressed   | 1.65 | down | 1.33 | down | 13.57 | down | 1.82 | down | 3.92 | down | 3.85 | down | 3   |
| Os.27943.1.S1_a_at | LOC_Os01g50030 | CPuORF25 - conserved peptide uORF-containing transcript, expressed                | 1.24 | down | 1.88 | up   | 4.53  | up   | 1.24 | down | 1.42 | down | 1.41 | down | ABA |
| Os.27943.1.S1_s_at | LOC_Os01g50030 | CPuORF25 - conserved peptide uORF-containing transcript, expressed                | 1.06 | up   | 2.09 | up   | 3.87  | up   | 1.08 | down | 1.40 | down | 1.62 | down | 2   |
| Os.27956.1.S1_at   | LOC_Os03g06360 | late embryogenesis abundant protein D-34, putative, expressed                     | 1.74 | up   | 1.29 | down | 34.05 | up   | 1.00 | down | 1.01 | down | 1.02 | up   | ABA |
| Os.27967.1.A1_at   | LOC_Os01g63620 | expressed protein                                                                 | 1.19 | up   | 1.01 | down | 4.69  | down | 1.39 | down | 1.50 | down | 1.06 | down | ABA |
| Os.27979.1.S1_at   | LOC_Os03g50120 | zinc finger family protein, putative, expressed                                   | 1.06 | up   | 1.01 | up   | 2.15  | down | 1.21 | up   | 1.33 | down | 1.35 | down | ABA |
| Os.27990.1.S1_at   | LOC_Os07g01620 | dirigent, putative, expressed                                                     | 1.28 | down | 1.30 | down | 4.17  | down | 1.47 | down | 1.67 | up   | 1.16 | up   | ABA |
| Os.27991.1.S1_at   | LOC_Os09g17850 | acetyltransferase type B catalytic subunit, putative, expressed                   | 1.03 | up   | 1.13 | up   | 3.68  | down | 1.08 | down | 1.95 | down | 1.77 | down | ABA |

|                     |                |                                                                                          |      |      |      |      |        |      |      |      |       |      |      |      |     |
|---------------------|----------------|------------------------------------------------------------------------------------------|------|------|------|------|--------|------|------|------|-------|------|------|------|-----|
| Os.280.1.S1_at      | LOC_Os04g32670 | exostosin family domain containing protein, expressed                                    | 1.10 | up   | 1.09 | up   | 2.14   | up   | 1.03 | down | 1.22  | up   | 1.13 | down | ABA |
| Os.280.1.S2_at      | LOC_Os04g32680 | POEI20 - Pollen Ole e l allergen and extensin family protein precursor, expressed        | 1.11 | down | 1.13 | down | 4.32   | up   | 1.01 | up   | 1.16  | up   | 1.57 | down | ABA |
| Os.28002.1.S1_at    | LOC_Os08g35710 | expressed protein                                                                        | 1.04 | up   | 1.06 | down | 3.77   | down | 1.42 | down | 1.96  | down | 1.76 | up   | ABA |
| Os.28030.1.S1_at    | LOC_Os06g48160 | glycosyl hydrolases family 16, putative, expressed                                       | 1.12 | up   | 1.21 | down | 3.07   | up   | 1.41 | down | 1.19  | up   | 1.26 | down | ABA |
| Os.28030.1.S1_s_at  | LOC_Os06g48160 | glycosyl hydrolases family 16, putative, expressed                                       | 1.08 | up   | 1.05 | down | 2.52   | up   | 1.24 | down | 1.32  | up   | 1.03 | down | ABA |
| Os.28030.2.A1_at    | LOC_Os06g48160 | glycosyl hydrolases family 16, putative, expressed                                       | 1.45 | up   | 1.26 | down | 4.32   | up   | 1.07 | up   | 1.06  | up   | 1.49 | down | ABA |
| Os.28032.1.A1_at    | LOC_Os01g21070 | endoglucanase, putative, expressed                                                       | 1.33 | down | 1.40 | down | 2.65   | down | 1.06 | down | 1.34  | down | 1.48 | down | ABA |
| Os.28042.1.S1_a_at  | LOC_Os04g35560 | glutathione S-transferase, putative, expressed                                           | 1.15 | up   | 1.12 | down | 2.88   | up   | 1.01 | up   | 1.26  | up   | 1.14 | up   | ABA |
| Os.28078.1.S1_at    | LOC_Os01g71050 | MSP domain containing protein, putative, expressed                                       | 1.20 | down | 1.15 | down | 2.18   | down | 1.21 | down | 1.31  | down | 1.04 | down | ABA |
| Os.28080.1.A1_at    | AK060371       | probable (S)-2-hydroxy-acid oxidase (EC 1.1.3.15), peroxisomal                           | 1.13 | down | 1.16 | down | 2.76   | up   | 1.05 | down | 1.02  | down | 1.01 | down | ABA |
| Os.28087.1.S1_s_at  | LOC_Os10g39440 | transporter family protein, putative, expressed                                          | 1.50 | down | 1.18 | down | 2.62   | down | 1.03 | down | 1.10  | up   | 1.20 | down | ABA |
| Os.28096.1.S1_at    | LOC_Os05g43170 | calreticulin precursor protein, putative, expressed                                      | 1.11 | down | 1.01 | up   | 2.42   | down | 1.13 | up   | 1.01  | down | 1.03 | down | ABA |
| Os.28098.1.S1_at    | LOC_Os10g32810 | beta-amylase, putative, expressed                                                        | 1.17 | up   | 1.15 | down | 83.38  | up   | 1.15 | up   | 1.74  | up   | 3.47 | down | 2   |
| Os.28110.4.S1_x_at  | AK068693       | L-asparaginase, putative                                                                 | 3.30 | up   | 1.54 | up   | 1.65   | down | 1.42 | down | 1.60  | up   | 1.51 | up   | IAA |
| Os.28127.1.S1_at    | LOC_Os03g12900 | squalene monooxygenase, putative, expressed                                              | 1.05 | down | 1.22 | down | 1.25   | up   | 1.12 | up   | 1.51  | down | 2.73 | down | JA  |
| Os.28129.1.S1_at    | LOC_Os05g42040 | UDP-glucoronosyl and UDP-glucosyl transferase domain containing protein, expressed       | 1.10 | up   | 1.45 | down | 4.57   | up   | 1.28 | down | 1.07  | down | 1.13 | down | ABA |
| Os.28148.1.S1_at    | LOC_Os03g11440 | protein transport protein Sec61 subunit alpha, putative, expressed                       | 1.20 | down | 1.05 | down | 2.21   | down | 1.23 | up   | 1.28  | down | 1.22 | up   | ABA |
| Os.28176.1.S1_at    | LOC_Os01g61680 | expressed protein                                                                        | 1.09 | up   | 1.03 | up   | 5.06   | up   | 1.05 | up   | 1.80  | up   | 1.10 | up   | ABA |
| Os.28192.1.S1_at    | LOC_Os12g42850 | amino acid permease, putative, expressed                                                 | 1.15 | up   | 1.27 | down | 2.26   | up   | 1.04 | up   | 1.27  | up   | 1.40 | up   | ABA |
| Os.2820.1.A1_at     | LOC_Os03g56900 | reticulon domain containing protein, putative, expressed                                 | 1.02 | down | 1.10 | up   | 3.15   | down | 1.14 | down | 1.51  | down | 2.14 | up   | 2   |
| Os.28200.1.S1_x_at  | LOC_Os03g61160 | expressed protein                                                                        | 3.03 | up   | 1.33 | up   | 194.40 | up   | 1.31 | up   | 16.04 | up   | 1.73 | down | 3   |
| Os.28217.1.S1_at    | LOC_Os01g62810 | regulator of chromosome condensation, putative, expressed                                | 1.36 | down | 1.09 | down | 2.06   | up   | 1.48 | up   | 1.25  | up   | 1.01 | down | ABA |
| Os.28229.2.S1_x_at  | LOC_Os01g52770 | GDSL-like lipase/acylhydrolase, putative, expressed                                      | 1.28 | up   | 1.06 | down | 2.73   | down | 1.51 | down | 1.13  | down | 1.58 | up   | ABA |
| Os.28320.1.S1_at    | LOC_Os05g38710 | lipin, N-terminal conserved region family protein, expressed                             | 1.01 | up   | 1.11 | down | 4.51   | up   | 1.16 | up   | 1.67  | up   | 1.52 | up   | ABA |
| Os.28385.1.S1_x_at  | LOC_Os11g02300 | CPuORF36 - conserved peptide uORF-containing transcript, expressed                       | 1.13 | up   | 1.00 | up   | 2.38   | up   | 1.44 | down | 1.49  | up   | 1.10 | down | ABA |
| Os.28385.2.S1_a_at  | LOC_Os11g02300 | CPuORF36 - conserved peptide uORF-containing transcript, expressed                       | 1.20 | down | 1.13 | down | 2.92   | up   | 1.44 | down | 1.60  | up   | 1.13 | down | ABA |
| Os.28394.2.S1_s_at  | LOC_Os05g38680 | plant-specific domain TIGR01589 family protein, expressed                                | 1.23 | down | 1.19 | up   | 4.76   | up   | 1.06 | down | 2.45  | down | 1.02 | down | 2   |
| Os.28404.1.A1_at    | LOC_Os03g07190 | expressed protein                                                                        | 1.12 | up   | 1.08 | down | 3.64   | up   | 1.10 | up   | 1.45  | up   | 1.38 | up   | ABA |
| Os.28406.1.S1_at    | LOC_Os09g11480 | AP2 domain containing protein, expressed                                                 | 1.22 | down | 1.30 | up   | 2.66   | down | 2.97 | up   | 1.33  | down | 2.12 | down | 3   |
| Os.28409.20.A1_a_at | LOC_Os05g03480 | acyl-coenzyme A dehydrogenase, mitochondrial precursor, putative, expressed              | 1.10 | up   | 1.13 | down | 2.95   | up   | 1.26 | up   | 1.90  | up   | 1.30 | up   | ABA |
| Os.28409.4.S1_s_at  | LOC_Os03g29830 | expressed protein                                                                        | 1.07 | down | 1.08 | down | 2.02   | down | 1.31 | up   | 1.00  | up   | 1.17 | up   | ABA |
| Os.28418.1.S1_a_at  | LOC_Os06g41360 | phosphoribosyl transferase, putative, expressed                                          | 1.20 | up   | 1.11 | up   | 2.77   | up   | 1.11 | up   | 1.42  | up   | 1.67 | up   | ABA |
| Os.28421.1.S1_at    | LOC_Os09g36240 | deoxyribodipyrimidine photolyase family protein, expressed                               | 1.26 | up   | 1.14 | up   | 4.59   | down | 1.53 | down | 1.95  | down | 1.70 | down | ABA |
| Os.28422.1.S1_at    | LOC_Os04g51610 | calcium-transporting ATPase, plasma membrane-type, putative, expressed                   | 1.09 | down | 1.09 | up   | 20.08  | up   | 1.23 | down | 1.48  | up   | 1.06 | down | ABA |
| Os.28427.1.S1_x_at  | LOC_Os05g12640 | BURP domain containing protein, expressed                                                | 1.80 | up   | 3.73 | up   | 5.77   | down | 5.70 | down | 4.25  | down | 7.60 | down | 5   |
| Os.28435.4.S1_at    | LOC_Os10g40934 | flavonol synthase/flavanone 3-hydroxylase, putative, expressed                           | 2.45 | down | 1.03 | down | 1.64   | down | 1.50 | up   | 1.11  | up   | 1.18 | up   | IAA |
| Os.28441.1.S1_at    | LOC_Os03g60560 | ZOS3-21 - C2H2 zinc finger protein, expressed                                            | 1.19 | down | 1.50 | down | 16.50  | up   | 1.06 | down | 1.76  | up   | 1.02 | up   | ABA |
| Os.28450.1.S1_at    | LOC_Os01g70730 | flowering promoting factor-like 1, putative, expressed                                   | 1.19 | down | 1.13 | up   | 5.54   | down | 1.07 | up   | 1.46  | down | 1.02 | down | ABA |
| Os.28457.1.S1_at    | LOC_Os11g48070 | GDSL-like lipase/acylhydrolase, putative, expressed                                      | 1.03 | up   | 1.09 | up   | 2.02   | down | 1.15 | down | 1.18  | down | 1.20 | down | ABA |
| Os.28489.1.S1_at    | LOC_Os01g52030 | zinc finger A20 and AN1 domain-containing stress-associated protein, putative, expressed | 1.11 | up   | 1.07 | down | 3.88   | up   | 1.75 | up   | 1.36  | up   | 1.06 | down | ABA |
| Os.28539.1.S1_at    | LOC_Os05g25040 | expressed protein                                                                        | 1.47 | down | 1.63 | down | 30.27  | up   | 1.30 | up   | 1.92  | up   | 1.12 | up   | ABA |
| Os.28617.1.S1_at    | LOC_Os02g57840 | remorin C-terminal domain containing protein, putative, expressed                        | 1.42 | down | 1.49 | down | 305.56 | up   | 2.47 | down | 1.29  | up   | 1.60 | down | 2   |
| Os.2867.1.A1_at     | LOC_Os11g45740 | MYB family transcription factor, putative, expressed                                     | 1.21 | down | 2.34 | down | 2.05   | up   | 1.47 | up   | 1.64  | up   | 6.97 | up   | 3   |
| Os.28679.1.S1_at    | LOC_Os07g45370 | expressed protein                                                                        | 1.46 | up   | 1.23 | down | 11.01  | up   | 1.39 | up   | 1.75  | up   | 1.08 | down | ABA |
| Os.28773.1.S1_at    | LOC_Os01g14650 | expansin precursor, putative, expressed                                                  | 1.77 | down | 1.44 | up   | 9.99   | down | 1.15 | down | 1.15  | down | 1.72 | down | ABA |
| Os.28798.1.S1_at    | CT833215       | Oryza sativa (indica cultivar-group) cDNA clone:OSIGCSA047I02, full insert sequence      | 1.07 | up   | 1.28 | up   | 4.59   | up   | 1.08 | down | 1.02  | down | 1.36 | down | ABA |
| Os.2881.1.S1_at     | LOC_Os10g40360 | proline oxidase, mitochondrial precursor, putative, expressed                            | 1.36 | up   | 1.24 | up   | 3.87   | down | 1.33 | up   | 2.08  | up   | 4.62 | up   | 3   |
| Os.28823.1.S1_at    | LOC_Os01g37750 | glutathione S-transferase, putative, expressed                                           | 1.22 | down | 1.25 | down | 3.33   | up   | 1.25 | down | 1.08  | up   | 1.07 | up   | ABA |
| Os.28909.1.S1_at    | LOC_Os01g45460 | serine esterase, putative, expressed                                                     | 1.18 | up   | 1.00 | down | 3.59   | up   | 1.00 | down | 1.00  | down | 1.01 | up   | ABA |
| Os.28952.1.S1_at    | LOC_Os01g08810 | cytochrome P450, putative, expressed                                                     | 1.21 | down | 1.14 | down | 2.45   | up   | 1.24 | down | 1.21  | up   | 1.02 | down | ABA |
| Os.28964.1.S1_at    | LOC_Os01g42790 | xylem cysteine proteinase 2 precursor, putative, expressed                               | 1.03 | down | 1.33 | down | 3.14   | down | 1.17 | down | 1.08  | down | 1.34 | down | ABA |
| Os.28988.1.S1_at    | LOC_Os01g73530 | ABC transporter, ATP-binding protein, putative, expressed                                | 1.00 | down | 1.19 | down | 2.07   | up   | 1.18 | up   | 1.72  | up   | 1.17 | up   | ABA |
| Os.28994.1.S1_at    | LOC_Os01g67390 | POEI32 - Pollen Ole e l allergen and extensin family protein precursor, expressed        | 1.22 | down | 1.12 | down | 1.45   | down | 1.36 | up   | 2.56  | down | 1.42 | up   | SA  |
| Os.29062.1.S1_at    | LOC_Os01g05150 | expressed protein                                                                        | 1.01 | down | 1.11 | down | 3.81   | up   | 1.36 | up   | 1.03  | up   | 1.11 | up   | ABA |
| Os.29084.1.S1_at    | LOC_Os01g53650 | zinc finger CCCH type family protein, putative, expressed                                | 1.01 | down | 1.00 | up   | 138.72 | up   | 1.19 | up   | 1.49  | up   | 1.03 | up   | ABA |

|                    |                |                                                                                       |       |      |      |      |        |      |      |      |       |      |       |      |     |
|--------------------|----------------|---------------------------------------------------------------------------------------|-------|------|------|------|--------|------|------|------|-------|------|-------|------|-----|
| Os.29093.1.S1_at   | LOC_Os07g14600 | hydrolase, putative, expressed                                                        | 1.04  | up   | 1.07 | up   | 7.89   | up   | 1.01 | down | 1.69  | up   | 1.12  | up   | ABA |
| Os.29115.1.S1_at   | LOC_Os01g02120 | osMFT2 MFT-Like2 homologous to Mother of FT and TFL1 gene, contains Pfam profile      | 1.01  | down | 1.00 | up   | 17.10  | up   | 1.01 | up   | 1.67  | up   | 1.12  | up   | ABA |
| Os.2914.1.S1_at    | LOC_Os07g44330 | kinase, putative, expressed                                                           | 1.32  | up   | 1.37 | down | 3.28   | up   | 1.08 | down | 1.07  | down | 1.06  | down | ABA |
| Os.2915.1.S1_at    | AK243113       | Oryza sativa Japonica Group cDNA, clone: J100027C20, full insert sequence.            | 1.69  | up   | 1.08 | down | 4.51   | up   | 1.18 | down | 2.15  | up   | 2.07  | up   | 2   |
| Os.2919.1.S1_s_at  | LOC_Os05g05830 | bifunctional protein fold, putative, expressed                                        | 1.04  | up   | 1.01 | up   | 2.43   | down | 1.23 | down | 1.37  | down | 1.19  | down | ABA |
| Os.29290.1.S1_at   | LOC_Os01g08780 | endonuclease/exonuclease/phosphatase family domain containing protein, expressed      | 1.88  | down | 1.32 | down | 12.26  | up   | 2.15 | down | 1.38  | up   | 4.77  | up   | 3   |
| Os.29377.1.S1_at   | LOC_Os06g22290 | legume lectins beta domain containing protein, expressed                              | 2.09  | down | 1.11 | down | 4.61   | down | 1.60 | up   | 1.11  | down | 1.04  | down | 2   |
| Os.2938.1.S1_at    | LOC_Os10g39640 | expansin precursor, putative, expressed                                               | 1.05  | up   | 1.55 | up   | 13.50  | up   | 1.29 | down | 1.30  | down | 2.28  | down | 2   |
| Os.2938.1.S1_x_at  | LOC_Os10g39640 | expansin precursor, putative, expressed                                               | 1.13  | up   | 1.27 | up   | 9.46   | up   | 1.09 | up   | 1.01  | down | 1.37  | down | ABA |
| Os.2957.1.S1_at    | LOC_Os03g25330 | peroxidase precursor, putative, expressed                                             | 1.42  | down | 1.30 | down | 13.01  | down | 1.49 | up   | 2.09  | down | 1.84  | up   | 2   |
| Os.29815.1.S1_at   | NM_001052010   | Oryza sativa (japonica cultivar-group) Os01g0962100 (Os01g0962100) mRNA, complete cds | 1.02  | up   | 1.00 | up   | 41.02  | up   | 1.04 | up   | 3.39  | up   | 1.56  | down | 2   |
| Os.29815.2.S1_x_at | LOC_Os01g73110 | expressed protein                                                                     | 1.58  | up   | 1.30 | down | 25.19  | up   | 1.02 | up   | 1.33  | up   | 1.02  | up   | ABA |
| Os.29823.2.S1_x_at | LOC_Os01g04160 | expressed protein                                                                     | 1.21  | down | 1.45 | down | 6.83   | up   | 1.51 | down | 1.21  | down | 1.02  | up   | ABA |
| Os.29823.3.S1_at   | LOC_Os01g04160 | expressed protein                                                                     | 1.23  | down | 1.21 | down | 6.56   | up   | 1.04 | down | 1.03  | down | 1.69  | up   | ABA |
| Os.29826.2.S1_at   | LOC_Os01g53990 | pectinesterase, putative, expressed                                                   | 1.31  | up   | 1.14 | down | 3.01   | down | 1.06 | up   | 2.56  | down | 1.13  | down | 2   |
| Os.29842.1.S1_x_at | LOC_Os01g50820 | transporter, major facilitator family, putative, expressed                            | 1.35  | down | 1.85 | down | 6.40   | down | 1.12 | down | 2.43  | down | 6.75  | down | 3   |
| Os.29865.1.S1_at   | LOC_Os01g56570 | xylosyltransferase, putative, expressed                                               | 9.89  | up   | 1.82 | up   | 5.02   | up   | 1.23 | down | 5.08  | up   | 1.49  | up   | 3   |
| Os.29933.1.S1_at   | LOC_Os07g44910 | gibberellin receptor GID1L2, putative, expressed                                      | 1.05  | down | 1.01 | down | 1.34   | up   | 1.06 | down | 1.00  | down | 4.08  | up   | JA  |
| Os.29958.1.S1_at   | LOC_Os07g36400 | expressed protein                                                                     | 1.32  | up   | 1.03 | up   | 5.16   | up   | 1.06 | down | 1.02  | up   | 1.20  | down | ABA |
| Os.29959.1.S1_at   | LOC_Os07g01810 | potassium channel protein, putative, expressed                                        | 1.15  | up   | 1.22 | down | 9.09   | up   | 1.24 | down | 1.19  | down | 1.10  | up   | ABA |
| Os.29973.1.S1_at   | LOC_Os01g09100 | OsWRKY10 - Superfamily of TFs having WRKY and zinc finger domains, expressed          | 1.65  | down | 1.00 | up   | 1.12   | down | 2.36 | up   | 1.54  | up   | 13.19 | up   | 2   |
| Os.30033.1.S1_at   | LOC_Os01g65260 | amidophosphoribosyltransferase, chloroplast precursor, putative, expressed            | 1.13  | up   | 1.00 | down | 3.47   | down | 1.76 | up   | 1.27  | down | 1.05  | down | ABA |
| Os.30044.1.S1_a_at | LOC_Os01g01870 | helix-loop-helix DNA-binding domain containing protein, expressed                     | 1.30  | up   | 1.10 | down | 2.07   | down | 1.43 | down | 1.38  | down | 4.54  | up   | 2   |
| Os.30049.1.S1_at   | LOC_Os03g25960 | RNA recognition motif containing protein, putative, expressed                         | 1.21  | up   | 1.11 | up   | 3.46   | down | 1.15 | down | 1.79  | down | 1.13  | down | ABA |
| Os.30054.1.S1_at   | AK109381       | probable peroxidase [imported] - Arabidopsis thaliana                                 | 1.05  | up   | 1.16 | down | 3.40   | down | 1.13 | down | 1.79  | down | 1.46  | down | ABA |
| Os.30063.1.S1_at   | LOC_Os05g45450 | DUF584 domain containing protein, putative, expressed                                 | 1.49  | up   | 1.21 | up   | 4.91   | up   | 1.02 | down | 1.58  | up   | 1.00  | down | ABA |
| Os.30245.1.S1_at   | LOC_Os08g06320 | DNA binding protein, putative, expressed                                              | 1.20  | down | 1.16 | down | 2.67   | down | 1.14 | up   | 1.49  | up   | 1.07  | up   | ABA |
| Os.30324.2.S1_x_at | LOC_Os01g44250 | CBS domain containing membrane protein, putative, expressed                           | 1.00  | down | 1.00 | up   | 157.91 | up   | 1.00 | up   | 1.00  | up   | 1.02  | up   | ABA |
| Os.30428.1.S1_at   | AK108858       | Oryza sativa (japonica cultivar-group) Os01g0288800 (Os01g0288800) mRNA, complete cds | 1.01  | down | 1.01 | up   | 5.28   | up   | 1.00 | up   | 1.00  | down | 1.03  | up   | ABA |
| Os.30473.1.S1_at   | LOC_Os01g11150 | gibberellin 2-beta-dioxygenase, putative, expressed                                   | 1.21  | down | 2.19 | up   | 6.73   | up   | 3.39 | up   | 1.52  | up   | 3.06  | up   | 4   |
| Os.3048.1.S1_at    | LOC_Os10g40600 | peptide transporter PTR2, putative, expressed                                         | 1.45  | up   | 1.02 | up   | 6.93   | up   | 1.33 | down | 2.09  | up   | 1.42  | down | 2   |
| Os.3048.2.S1_x_at  | LOC_Os10g40600 | peptide transporter PTR2, putative, expressed                                         | 1.18  | up   | 1.17 | down | 4.89   | up   | 1.10 | down | 1.63  | up   | 1.10  | down | ABA |
| Os.30512.1.S1_at   | LOC_Os01g43650 | OsWRKY11 - Superfamily of TFs having WRKY and zinc finger domains, expressed          | 1.51  | up   | 2.42 | up   | 1.06   | up   | 1.26 | up   | 3.59  | up   | 3.32  | up   | 3   |
| Os.30516.1.S1_at   | LOC_Os01g67360 | methyltransferase, putative, expressed                                                | 1.35  | down | 1.55 | down | 13.01  | down | 1.37 | down | 1.40  | down | 1.67  | down | ABA |
| Os.30528.1.S1_at   | LOC_Os08g31860 | expressed protein                                                                     | 1.01  | down | 1.00 | down | 15.69  | up   | 1.02 | down | 1.50  | up   | 1.14  | up   | ABA |
| Os.30567.1.S1_at   | AK108658       | probable zinc finger protein                                                          | 1.88  | down | 1.17 | up   | 5.04   | down | 1.11 | down | 1.89  | down | 1.07  | down | ABA |
| Os.30593.1.S1_at   | LOC_Os01g71070 | xylanase inhibitor, putative, expressed                                               | 1.05  | down | 1.19 | down | 1.54   | up   | 2.08 | down | 1.67  | down | 6.42  | up   | 2   |
| Os.30608.1.S1_at   | LOC_Os10g10180 | methyltransferase domain containing protein, putative, expressed                      | 1.02  | down | 1.00 | up   | 2.29   | down | 1.04 | down | 1.30  | down | 1.25  | down | ABA |
| Os.30670.2.S1_x_at | LOC_Os07g22730 | AP2 domain containing protein, expressed                                              | 12.66 | up   | 1.96 | up   | 1.03   | up   | 2.07 | down | 3.19  | up   | 1.13  | up   | 2   |
| Os.30866.1.S1_at   | LOC_Os07g02460 | expressed protein                                                                     | 1.23  | down | 1.11 | up   | 1.42   | up   | 2.08 | down | 1.53  | up   | 1.73  | up   | ACC |
| Os.30886.1.S1_at   | LOC_Os03g61360 | hydrolase, alpha/beta fold family domain containing protein, expressed                | 1.36  | up   | 1.05 | up   | 3.08   | up   | 1.42 | up   | 10.30 | up   | 2.79  | up   | 3   |
| Os.30886.1.S1_x_at | LOC_Os03g61360 | hydrolase, alpha/beta fold family domain containing protein, expressed                | 2.55  | up   | 1.05 | up   | 2.63   | up   | 1.45 | up   | 14.24 | up   | 2.94  | up   | 4   |
| Os.30886.2.S1_x_at | LOC_Os03g61360 | hydrolase, alpha/beta fold family domain containing protein, expressed                | 2.65  | up   | 1.03 | up   | 2.95   | up   | 1.80 | up   | 14.39 | up   | 3.81  | up   | 4   |
| Os.30886.3.S1_x_at | LOC_Os03g61360 | hydrolase, alpha/beta fold family domain containing protein, expressed                | 2.76  | up   | 1.12 | up   | 2.27   | up   | 1.33 | up   | 9.40  | up   | 2.95  | up   | 4   |
| Os.30962.1.S1_at   | LOC_Os02g35000 | chaperone protein dnaJ 10, putative, expressed                                        | 1.06  | down | 1.33 | down | 2.06   | up   | 1.22 | down | 1.04  | up   | 1.68  | down | ABA |
| Os.31021.1.S1_at   | LOC_Os07g36430 | expressed protein                                                                     | 11.04 | up   | 1.10 | down | 12.48  | up   | 1.07 | down | 1.63  | up   | 1.26  | down | 2   |
| Os.31022.1.S1_at   | LOC_Os06g02040 | late embryogenesis abundant group 1, putative, expressed                              | 1.00  | up   | 1.01 | up   | 664.16 | up   | 1.26 | up   | 1.01  | up   | 1.04  | up   | ABA |
| Os.31089.1.S1_at   | LOC_Os03g02400 | plastocyanin-like domain containing protein, putative, expressed                      | 1.32  | down | 1.48 | up   | 2.12   | down | 1.18 | down | 2.06  | down | 1.74  | down | 2   |
| Os.31128.1.S1_x_at | LOC_Os01g60350 | hypothetical protein                                                                  | 1.02  | down | 1.18 | down | 3.84   | up   | 1.11 | up   | 1.02  | up   | 1.06  | down | ABA |
| Os.31128.2.S1_at   | LOC_Os01g60350 | hypothetical protein                                                                  | 1.02  | up   | 1.06 | down | 7.16   | up   | 1.18 | up   | 1.19  | up   | 1.37  | up   | ABA |
| Os.31147.1.S1_at   | LOC_Os03g06610 | expressed protein                                                                     | 1.40  | down | 1.27 | down | 1.77   | down | 1.35 | up   | 1.03  | up   | 2.94  | down | JA  |
| Os.31151.2.S1_at   | LOC_Os03g59180 | expressed protein                                                                     | 1.66  | up   | 1.45 | down | 2.56   | up   | 1.31 | up   | 1.04  | up   | 1.11  | up   | ABA |
| Os.31171.1.S1_at   | LOC_Os01g40290 | expressed protein                                                                     | 1.31  | up   | 1.80 | up   | 1.20   | up   | 4.13 | up   | 3.48  | up   | 2.78  | down | 3   |
| Os.31185.1.S1_at   | LOC_Os01g13950 | OsGrx_A1 - glutaredoxin subgroup III, expressed                                       | 1.48  | up   | 1.17 | down | 5.06   | up   | 1.01 | down | 4.90  | up   | 2.79  | up   | 3   |
| Os.3121.1.S1_at    | LOC_Os10g28050 | chitinase 2, putative, expressed                                                      | 1.01  | up   | 1.48 | up   | 2.47   | down | 1.12 | down | 1.25  | down | 1.08  | down | ABA |

|                    |                |                                                                                       |      |      |      |      |       |      |      |      |       |      |       |      |     |
|--------------------|----------------|---------------------------------------------------------------------------------------|------|------|------|------|-------|------|------|------|-------|------|-------|------|-----|
| Os.31293.1.S1_at   | LOC_Os01g70500 | expressed protein                                                                     | 1.01 | up   | 1.31 | down | 9.18  | up   | 1.10 | down | 1.05  | down | 1.73  | down | ABA |
| Os.31303.1.S1_at   | LOC_Os03g08930 | helix-loop-helix DNA-binding protein, putative, expressed                             | 1.67 | down | 3.47 | up   | 2.74  | down | 1.28 | up   | 1.07  | down | 1.95  | down | 2   |
| Os.31379.1.S1_s_at | LOC_Os10g41560 | expressed protein                                                                     | 1.13 | down | 1.03 | down | 5.71  | up   | 1.04 | up   | 1.30  | up   | 1.12  | down | ABA |
| Os.31415.1.S1_at   | LOC_Os10g13810 | glycosyltransferase family 43 protein, putative, expressed                            | 1.07 | down | 1.26 | down | 4.43  | up   | 1.24 | up   | 1.16  | up   | 1.02  | up   | ABA |
| Os.31430.1.S1_at   | LOC_Os07g13830 | OsFBX228 - F-box domain containing protein, expressed                                 | 1.00 | up   | 1.00 | up   | 3.77  | up   | 1.00 | down | 1.02  | down | 1.01  | up   | ABA |
| Os.31464.1.S1_a_at | LOC_Os04g44530 | expressed protein                                                                     | 1.47 | down | 1.04 | up   | 11.38 | up   | 1.04 | down | 1.70  | up   | 1.07  | up   | ABA |
| Os.315.1.S1_at     | LOC_Os03g39710 | transporter family protein, putative, expressed                                       | 1.07 | down | 1.18 | down | 2.34  | up   | 1.53 | down | 1.42  | up   | 1.26  | down | ABA |
| Os.31636.1.S1_at   | LOC_Os08g32960 | endonuclease/exonuclease/phosphatase family domain containing protein, expressed      | 1.01 | down | 1.08 | down | 7.23  | up   | 1.09 | down | 1.30  | down | 1.38  | down | ABA |
| Os.31693.2.S1_at   | LOC_Os01g48830 | expressed protein                                                                     | 1.03 | up   | 1.01 | up   | 3.87  | up   | 1.08 | up   | 1.05  | up   | 1.04  | up   | ABA |
| Os.31693.3.S1_at   | LOC_Os01g48830 | expressed protein                                                                     | 1.01 | down | 1.09 | down | 2.49  | up   | 1.01 | down | 1.09  | up   | 1.03  | up   | ABA |
| Os.31716.2.A1_at   | LOC_Os06g01620 | scarecrow, putative, expressed                                                        | 1.36 | down | 1.17 | down | 5.48  | down | 1.31 | down | 1.20  | down | 1.17  | down | ABA |
| Os.31771.2.S1_at   | LOC_Os03g51479 | maf, putative, expressed                                                              | 1.34 | down | 1.12 | up   | 1.97  | up   | 1.81 | up   | 4.11  | up   | 1.18  | up   | SA  |
| Os.31771.2.S1_x_at | LOC_Os03g51479 | maf, putative, expressed                                                              | 1.26 | down | 1.21 | down | 1.51  | up   | 1.63 | up   | 4.82  | up   | 1.22  | down | SA  |
| Os.31838.1.S1_at   | LOC_Os03g24870 | transporter family protein, putative, expressed                                       | 1.15 | up   | 1.12 | down | 3.63  | down | 1.22 | down | 1.74  | down | 1.56  | up   | ABA |
| Os.31867.1.S1_at   | LOC_Os09g39020 | N-rich protein, putative, expressed                                                   | 1.22 | down | 1.31 | down | 6.21  | up   | 1.20 | up   | 1.35  | up   | 1.29  | down | ABA |
| Os.31908.1.S1_at   | LOC_Os01g12440 | AP2 domain containing protein, expressed                                              | 3.31 | up   | 1.19 | up   | 1.01  | up   | 1.36 | up   | 1.51  | up   | 1.08  | up   | IAA |
| Os.31975.1.S1_at   | LOC_Os05g10670 | zinc finger CCCH type family protein, putative, expressed                             | 1.29 | up   | 1.25 | down | 13.98 | up   | 1.07 | down | 1.06  | up   | 1.24  | down | ABA |
| Os.31975.1.S1_x_at | LOC_Os05g10670 | zinc finger CCCH type family protein, putative, expressed                             | 1.27 | up   | 1.16 | down | 10.73 | up   | 1.06 | down | 1.04  | up   | 1.37  | down | ABA |
| Os.31991.1.S1_s_at | LOC_Os11g02290 | expressed protein                                                                     | 1.24 | up   | 1.44 | up   | 5.70  | up   | 1.27 | down | 1.00  | up   | 2.51  | down | 2   |
| Os.32022.1.S1_x_at | LOC_Os07g37620 | fiber expressed protein, putative, expressed                                          | 1.04 | up   | 1.27 | up   | 2.27  | up   | 1.09 | up   | 1.35  | down | 1.31  | down | ABA |
| Os.3206.1.S1_at    | LOC_Os10g32980 | CESA7 - cellulose synthase, expressed                                                 | 1.02 | up   | 1.22 | up   | 2.61  | down | 1.32 | down | 1.91  | down | 1.07  | down | ABA |
| Os.32078.1.S1_at   | LOC_Os01g51140 | helix-loop-helix DNA-binding domain containing protein, expressed                     | 1.58 | down | 2.42 | up   | 2.21  | down | 1.77 | up   | 2.30  | down | 2.08  | down | 4   |
| Os.32115.1.S1_at   | LOC_Os01g71350 | glycosyl hydrolases family 17, putative, expressed                                    | 1.40 | down | 1.63 | down | 3.06  | down | 1.26 | up   | 1.61  | down | 1.80  | up   | ABA |
| Os.32126.1.S1_x_at | LOC_Os03g54050 | anther-specific proline-rich protein APG precursor, putative, expressed               | 1.04 | up   | 1.18 | down | 2.02  | up   | 1.01 | up   | 1.06  | up   | 1.40  | up   | ABA |
| Os.32153.1.S1_at   | LOC_Os01g61440 | expressed protein                                                                     | 2.44 | up   | 1.19 | down | 1.68  | up   | 1.11 | up   | 1.63  | up   | 1.66  | up   | IAA |
| Os.32192.1.S1_at   | LOC_Os01g67090 | IQ calmodulin-binding motif domain containing protein, expressed                      | 1.17 | up   | 1.06 | down | 2.18  | down | 1.59 | down | 1.24  | down | 1.10  | down | ABA |
| Os.32252.1.S1_at   | LOC_Os01g48446 | no apical meristem protein, putative, expressed                                       | 1.06 | down | 1.09 | down | 2.45  | up   | 1.14 | up   | 1.51  | up   | 1.15  | up   | ABA |
| Os.32272.1.S1_s_at | LOC_Os01g28690 | nucleoporin autopeptidase domain containing protein, expressed                        | 1.06 | down | 1.19 | up   | 2.87  | up   | 1.25 | down | 1.02  | down | 1.59  | down | ABA |
| Os.32272.1.S1_x_at | LOC_Os01g28690 | nucleoporin autopeptidase domain containing protein, expressed                        | 1.25 | up   | 1.09 | up   | 3.15  | up   | 1.03 | up   | 1.08  | up   | 1.05  | down | ABA |
| Os.32279.1.S1_at   | LOC_Os01g63400 | PPR repeat containing protein, expressed                                              | 1.04 | up   | 1.24 | down | 2.67  | up   | 1.20 | up   | 1.14  | up   | 1.04  | up   | ABA |
| Os.32292.1.S1_at   | LOC_Os01g36240 | peroxidase precursor, putative, expressed                                             | 1.14 | down | 2.29 | up   | 1.11  | down | 1.15 | down | 1.28  | down | 1.35  | up   | BAP |
| Os.32314.1.S1_at   | LOC_Os08g32910 | expressed protein                                                                     | 1.27 | down | 1.11 | down | 3.62  | down | 1.09 | down | 1.75  | down | 1.15  | down | ABA |
| Os.32357.1.S1_at   | LOC_Os07g46950 | ligA, putative, expressed                                                             | 1.01 | up   | 1.03 | down | 47.66 | up   | 1.02 | up   | 2.33  | up   | 1.24  | up   | 2   |
| Os.32357.1.S1_x_at | LOC_Os07g46950 | ligA, putative, expressed                                                             | 1.00 | up   | 1.02 | up   | 11.54 | up   | 1.00 | down | 1.02  | up   | 1.04  | up   | ABA |
| Os.3241.1.S1_at    | AK068326       | Oryza sativa (japonica cultivar-group) Os10g0522700 (Os10g0522700) mRNA, complete cds | 1.01 | down | 1.61 | up   | 12.67 | down | 1.33 | down | 1.95  | down | 1.81  | up   | ABA |
| Os.32439.1.S1_at   | LOC_Os01g56610 | homocysteine S-methyltransferase protein, putative, expressed                         | 1.01 | down | 1.00 | up   | 78.48 | up   | 1.00 | up   | 1.00  | up   | 1.01  | up   | ABA |
| Os.32455.1.S1_at   | LOC_Os01g54670 | coiled-coil domain-containing protein 25, putative, expressed                         | 1.71 | down | 1.37 | up   | 5.50  | down | 1.11 | up   | 1.28  | down | 1.66  | up   | ABA |
| Os.32465.1.S1_at   | LOC_Os02g54710 | expressed protein                                                                     | 1.18 | up   | 1.31 | up   | 4.00  | down | 1.25 | down | 1.75  | down | 1.44  | down | ABA |
| Os.32471.1.S1_at   | LOC_Os03g55410 | peroxidase precursor, putative, expressed                                             | 1.06 | down | 1.07 | up   | 5.67  | up   | 1.68 | down | 1.21  | down | 2.22  | down | 2   |
| Os.32492.1.S1_at   | LOC_Os03g14040 | expressed protein                                                                     | 1.09 | up   | 1.03 | up   | 3.93  | down | 1.24 | down | 1.58  | down | 1.40  | down | ABA |
| Os.32504.2.S1_at   | LOC_Os07g02100 | flavin-containing monooxygenase family protein, putative, expressed                   | 1.39 | down | 1.15 | up   | 4.39  | down | 1.14 | down | 1.71  | down | 1.55  | down | ABA |
| Os.32568.1.S1_at   | LOC_Os01g07200 | staphylococcal nuclease homologue, putative, expressed                                | 1.08 | down | 1.06 | down | 3.59  | up   | 1.19 | down | 1.07  | up   | 1.16  | down | ABA |
| Os.32597.1.S1_at   | LOC_Os01g47300 | retrotransposon protein, putative, unclassified, expressed                            | 1.01 | down | 1.00 | down | 1.04  | down | 1.00 | up   | 15.40 | up   | 1.03  | up   | SA  |
| Os.32597.1.S1_x_at | LOC_Os01g47300 | retrotransposon protein, putative, unclassified, expressed                            | 1.01 | down | 1.00 | up   | 1.03  | down | 1.00 | up   | 11.57 | up   | 1.04  | up   | SA  |
| Os.32622.1.S1_at   | LOC_Os01g01170 | expressed protein                                                                     | 1.15 | down | 1.21 | up   | 4.66  | down | 1.20 | down | 1.73  | down | 2.41  | down | 2   |
| Os.32630.1.S1_at   | LOC_Os10g32700 | hypersensitive-induced response protein, putative, expressed                          | 1.05 | down | 1.31 | up   | 1.99  | down | 2.86 | up   | 1.62  | up   | 10.32 | down | 3   |
| Os.32659.1.S1_at   | LOC_Os03g20020 | plant neutral invertase domain containing protein, expressed                          | 1.19 | up   | 1.04 | down | 4.41  | up   | 1.18 | up   | 1.71  | up   | 1.32  | up   | ABA |
| Os.32667.1.S1_at   | LOC_Os01g12070 | endoglucanase precursor, putative, expressed                                          | 1.67 | up   | 2.57 | down | 6.51  | down | 1.36 | down | 2.95  | down | 4.64  | down | 4   |
| Os.32668.1.S1_at   | LOC_Os01g08090 | flavonol-3-O-glycoside-7-O-glucosyltransferase 1, putative, expressed                 | 2.21 | up   | 1.03 | up   | 1.19  | down | 1.14 | down | 1.67  | up   | 1.03  | up   | IAA |
| Os.32680.1.S1_at   | LOC_Os07g05190 | leucine-rich repeat family protein, putative, expressed                               | 1.17 | down | 1.14 | down | 2.86  | down | 1.09 | down | 1.28  | down | 1.49  | down | ABA |
| Os.32687.1.S1_at   | LOC_Os01g12720 | protein kinase domain containing protein, expressed                                   | 1.14 | up   | 1.18 | down | 2.53  | up   | 1.02 | down | 1.04  | up   | 1.05  | down | ABA |
| Os.32727.1.S1_at   | LOC_Os01g43480 | AAA-type ATPase family protein, putative, expressed                                   | 3.27 | up   | 1.39 | down | 2.14  | down | 1.02 | up   | 1.56  | down | 1.25  | down | 2   |
| Os.32752.2.S1_s_at | LOC_Os01g60910 | CAMK_KIN1/SNF1/Nim1_like.12 - CAMK includes calcium/calmodulin dependent protein      | 1.25 | up   | 1.00 | down | 2.45  | up   | 1.05 | down | 1.14  | down | 1.10  | down | ABA |
| Os.32753.1.S1_at   | LOC_Os01g49030 | expressed protein                                                                     | 1.30 | up   | 1.30 | down | 9.93  | up   | 1.37 | up   | 1.47  | up   | 1.40  | down | ABA |
| Os.32760.1.S1_at   | LOC_Os01g07130 | expressed protein                                                                     | 1.00 | down | 1.92 | down | 1.32  | up   | 1.11 | up   | 2.56  | up   | 3.31  | up   | 2   |

|                    |                |                                                                                   |      |      |      |      |        |      |      |      |       |      |      |      |     |
|--------------------|----------------|-----------------------------------------------------------------------------------|------|------|------|------|--------|------|------|------|-------|------|------|------|-----|
| Os.32770.1.S1_at   | LOC_Os01g09990 | helix-loop-helix DNA-binding domain containing protein, expressed                 | 1.08 | down | 1.99 | up   | 1.15   | up   | 2.25 | up   | 1.50  | down | 6.33 | up   | 2   |
| Os.32770.1.S1_x_at | LOC_Os01g09990 | helix-loop-helix DNA-binding domain containing protein, expressed                 | 1.31 | down | 1.45 | up   | 1.09   | down | 1.89 | up   | 1.64  | down | 5.78 | up   | JA  |
| Os.32770.2.S1_x_at | LOC_Os01g09990 | helix-loop-helix DNA-binding domain containing protein, expressed                 | 1.14 | down | 1.12 | up   | 1.55   | down | 1.78 | up   | 1.51  | down | 7.67 | up   | JA  |
| Os.3278.1.S1_at    | LOC_Os01g40130 | Mur ligase family protein, putative, expressed                                    | 1.03 | down | 1.15 | up   | 2.93   | down | 1.18 | down | 1.61  | down | 1.11 | down | ABA |
| Os.32782.1.S1_at   | LOC_Os08g43170 | hydroxymethylglutaryl-CoA synthase, putative, expressed                           | 1.10 | up   | 1.22 | down | 2.50   | up   | 1.10 | up   | 1.39  | up   | 1.27 | up   | ABA |
| Os.3280.1.S1_at    | LOC_Os01g40040 | expressed protein                                                                 | 1.04 | down | 1.10 | up   | 267.99 | up   | 1.75 | down | 2.88  | up   | 1.27 | up   | 2   |
| Os.32822.1.S1_at   | LOC_Os01g05960 | receptor kinase, putative, expressed                                              | 1.25 | up   | 1.76 | up   | 7.57   | up   | 2.22 | up   | 3.03  | up   | 1.07 | up   | 3   |
| Os.32827.1.S1_at   | LOC_Os01g46290 | lipase, putative, expressed                                                       | 1.46 | down | 1.17 | down | 2.71   | up   | 1.00 | up   | 1.17  | down | 1.15 | up   | ABA |
| Os.32856.1.S1_at   | LOC_Os01g55450 | CAMK_KIN1/SNF1/Nim1_like.11 - CAMK includes calcium/calmodulin dependent protein  | 1.24 | down | 1.20 | down | 9.73   | up   | 1.19 | up   | 1.12  | up   | 1.02 | up   | ABA |
| Os.32856.1.S2_at   | LOC_Os01g55450 | CAMK_KIN1/SNF1/Nim1_like.11 - CAMK includes calcium/calmodulin dependent protein  | 1.62 | down | 1.65 | down | 15.57  | up   | 1.06 | down | 1.04  | up   | 1.01 | down | ABA |
| Os.32890.1.S1_at   | LOC_Os01g47600 | glycosyl hydrolase, putative, expressed                                           | 1.86 | down | 1.01 | down | 4.50   | up   | 1.46 | up   | 2.61  | up   | 1.54 | up   | 2   |
| Os.32943.1.S1_at   | LOC_Os01g12660 | AAA-type ATPase family protein, putative, expressed                               | 1.02 | up   | 1.02 | up   | 151.29 | up   | 2.35 | up   | 1.32  | up   | 1.01 | up   | 2   |
| Os.32943.2.S1_x_at | LOC_Os01g12660 | AAA-type ATPase family protein, putative, expressed                               | 1.01 | down | 1.03 | up   | 107.00 | up   | 1.03 | up   | 1.00  | up   | 1.02 | up   | ABA |
| Os.33007.1.S1_x_at | LOC_Os07g27480 | ELMO/CED-12 family protein, putative, expressed                                   | 1.07 | up   | 1.11 | down | 2.03   | up   | 1.10 | down | 1.12  | up   | 1.01 | up   | ABA |
| Os.33038.1.S1_a_at | LOC_Os01g52100 | DUF581 domain containing protein, expressed                                       | 1.30 | up   | 1.34 | down | 3.73   | up   | 1.70 | down | 1.01  | down | 1.09 | up   | ABA |
| Os.33087.1.S1_at   | LOC_Os07g35060 | OsFBX238 - F-box domain containing protein, expressed                             | 2.69 | down | 1.04 | down | 1.83   | up   | 1.08 | down | 1.08  | down | 1.63 | down | IAA |
| Os.33102.1.S1_at   | LOC_Os01g43740 | cytochrome P450 72A1, putative, expressed                                         | 1.11 | down | 1.01 | up   | 2.04   | down | 1.16 | down | 19.26 | up   | 2.00 | down | 3   |
| Os.33106.1.S1_at   | LOC_Os01g57730 | peroxidase precursor, putative, expressed                                         | 1.55 | up   | 1.22 | down | 3.12   | down | 1.49 | down | 1.43  | up   | 1.86 | down | ABA |
| Os.33110.1.S1_at   | LOC_Os01g45900 | OsFBX20 - F-box domain containing protein, expressed                              | 1.09 | down | 1.02 | up   | 2.55   | up   | 1.20 | down | 1.63  | up   | 1.32 | down | ABA |
| Os.33170.1.S1_x_at | LOC_Os01g45550 | auxin efflux carrier component, putative, expressed                               | 1.42 | up   | 1.27 | down | 2.76   | down | 1.20 | up   | 1.14  | down | 1.33 | up   | ABA |
| Os.33184.1.S1_at   | LOC_Os01g51870 | methyltransferase, putative, expressed                                            | 1.32 | down | 1.02 | down | 1.45   | up   | 1.25 | down | 2.71  | up   | 1.28 | up   | SA  |
| Os.33210.1.S1_at   | LOC_Os01g68570 | expressed protein                                                                 | 1.00 | down | 1.72 | down | 2.18   | up   | 1.17 | up   | 2.02  | up   | 1.19 | down | 2   |
| Os.33210.2.S1_x_at | LOC_Os01g68570 | expressed protein                                                                 | 1.49 | up   | 2.00 | down | 2.44   | up   | 1.07 | up   | 2.03  | up   | 1.03 | down | 3   |
| Os.33212.2.S1_at   | LOC_Os01g67580 | multidrug resistance-associated protein, putative, expressed                      | 1.45 | down | 1.18 | down | 3.08   | up   | 1.13 | down | 1.03  | up   | 1.22 | down | ABA |
| Os.33238.2.S1_at   | AK101258       | C2 domain-containing protein                                                      | 1.14 | up   | 1.31 | up   | 3.13   | up   | 1.42 | up   | 2.63  | up   | 1.40 | up   | 2   |
| Os.33244.1.S1_at   | LOC_Os01g62900 | amino acid kinase, putative, expressed                                            | 1.01 | up   | 1.10 | down | 5.23   | up   | 1.19 | down | 1.14  | down | 1.01 | up   | ABA |
| Os.33244.1.S2_at   | LOC_Os01g62910 | CRR2, putative, expressed                                                         | 1.02 | down | 1.01 | down | 3.09   | up   | 1.00 | up   | 1.00  | down | 1.01 | up   | ABA |
| Os.33309.1.S1_at   | LOC_Os01g56810 | cytokinin dehydrogenase precursor, putative, expressed                            | 1.14 | up   | 5.77 | up   | 1.83   | down | 1.00 | up   | 1.30  | down | 1.89 | up   | BAP |
| Os.33316.1.S1_at   | LOC_Os01g34560 | 3-ketoacyl-CoA synthase, putative, expressed                                      | 1.21 | down | 1.01 | up   | 4.01   | down | 1.11 | up   | 1.07  | down | 1.26 | up   | ABA |
| Os.33336.1.S1_at   | LOC_Os01g11350 | bZIP transcription factor domain containing protein, expressed                    | 1.26 | down | 1.20 | down | 2.59   | down | 1.09 | down | 1.12  | down | 1.29 | down | ABA |
| Os.33341.1.S1_at   | LOC_Os01g45830 | sulfate transporter, putative, expressed                                          | 1.17 | up   | 1.06 | up   | 2.10   | up   | 1.02 | down | 1.34  | up   | 1.10 | up   | ABA |
| Os.33373.1.S1_x_at | LOC_Os01g44069 | glycerol-3-phosphate acyltransferase, putative, expressed                         | 2.47 | up   | 1.35 | down | 1.00   | down | 1.00 | up   | 1.05  | up   | 1.01 | down | IAA |
| Os.33373.1.S2_x_at | LOC_Os01g44069 | glycerol-3-phosphate acyltransferase, putative, expressed                         | 2.01 | up   | 1.00 | up   | 1.01   | down | 1.00 | down | 1.00  | down | 1.01 | up   | IAA |
| Os.33471.1.A1_at   | LOC_Os08g38700 | C3-BTB2 - Bric-a-Brac, Tramtrack, Broad Complex BTB domain with C3 subfamily cons | 1.02 | up   | 1.20 | up   | 3.14   | up   | 1.31 | up   | 1.98  | down | 2.47 | down | 3   |
| Os.33529.1.S1_at   | LOC_Os01g62500 | OsFtsH3 FtsH protease, homologue of AtFtsH3/10, expressed                         | 1.23 | up   | 1.00 | up   | 3.14   | up   | 1.80 | down | 1.48  | up   | 1.10 | down | ABA |
| Os.33605.2.S1_x_at | LOC_Os01g50750 | zinc finger, C3HC4 type domain containing protein, expressed                      | 1.10 | down | 1.04 | up   | 3.80   | up   | 1.22 | down | 1.19  | down | 1.17 | down | ABA |
| Os.33613.1.S1_at   | LOC_Os01g06280 | TKL_IRAK_CrRLK1L-1.4 - The CrRLK1L-1 subfamily has homology to the CrRLK1L ho     | 1.39 | down | 1.06 | up   | 2.44   | down | 1.24 | down | 1.37  | down | 1.06 | up   | ABA |
| Os.33625.4.S1_at   | LOC_Os01g70850 | esterase, putative, expressed                                                     | 3.21 | up   | 2.63 | up   | 1.33   | up   | 1.15 | up   | 5.64  | up   | 1.56 | up   | 3   |
| Os.33625.5.S1_x_at | LOC_Os01g70840 | esterase, putative, expressed                                                     | 1.07 | down | 2.49 | up   | 2.17   | down | 1.20 | down | 1.06  | down | 1.38 | down | 2   |
| Os.33676.2.S1_at   | LOC_Os03g32790 | expressed protein                                                                 | 1.78 | up   | 1.40 | down | 5.40   | down | 1.32 | down | 1.28  | down | 1.95 | down | ABA |
| Os.33676.3.S1_x_at | LOC_Os03g32790 | expressed protein                                                                 | 2.53 | up   | 1.42 | down | 4.24   | down | 1.36 | down | 1.38  | down | 2.12 | down | 3   |
| Os.33687.1.S1_at   | LOC_Os01g19800 | zinc finger, C3HC4 type, putative, expressed                                      | 1.08 | down | 1.07 | down | 10.56  | up   | 1.43 | down | 1.04  | up   | 1.22 | down | ABA |
| Os.33696.1.S1_at   | LOC_Os01g50050 | polyprenyl synthetase, putative, expressed                                        | 1.45 | up   | 1.55 | down | 4.99   | up   | 2.83 | down | 2.86  | up   | 1.01 | up   | 3   |
| Os.33704.3.S1_x_at | LOC_Os01g20110 | expressed protein                                                                 | 1.11 | up   | 1.15 | down | 3.10   | down | 1.25 | down | 1.86  | down | 1.27 | down | ABA |
| Os.33747.1.S1_at   | LOC_Os08g30810 | puromycin-sensitive aminopeptidase, putative, expressed                           | 1.19 | up   | 1.14 | down | 3.09   | up   | 1.12 | down | 1.12  | up   | 1.03 | up   | ABA |
| Os.33755.1.S1_at   | LOC_Os03g05280 | ras-related protein, putative, expressed                                          | 1.09 | down | 1.12 | down | 4.33   | up   | 1.03 | down | 1.06  | down | 1.11 | down | ABA |
| Os.3376.1.S1_at    | LOC_Os02g56130 | PCNA - Putative DNA replicative polymerase clamp, expressed                       | 1.47 | down | 1.05 | up   | 8.26   | down | 1.16 | down | 2.39  | down | 2.29 | down | 3   |
| Os.33762.1.S1_at   | LOC_Os01g11160 | amino acid permease family protein, putative, expressed                           | 2.02 | down | 1.83 | up   | 3.76   | down | 1.19 | up   | 1.40  | down | 1.41 | down | 2   |
| Os.33770.1.S1_at   | LOC_Os01g59510 | chloroplast ribonuclease III domain protein, putative, expressed                  | 1.53 | down | 1.18 | down | 3.76   | down | 1.20 | down | 1.68  | down | 1.34 | down | ABA |
| Os.33786.1.S1_at   | LOC_Os02g58450 | uncharacterized ACR, COG1399 family protein, expressed                            | 1.42 | up   | 1.33 | up   | 3.49   | down | 1.65 | down | 1.64  | down | 1.65 | down | ABA |
| Os.33834.1.S1_at   | AK073863       | Oryza sativa Japonica Group cDNA clone:J033071F17, full insert sequence.          | 1.05 | down | 1.33 | down | 2.09   | down | 1.06 | down | 1.08  | down | 1.22 | down | ABA |
| Os.3386.1.S1_x_at  | LOC_Os06g10350 | MYB family transcription factor, putative, expressed                              | 1.19 | up   | 1.04 | down | 7.69   | down | 1.69 | up   | 1.18  | down | 2.50 | up   | 2   |
| Os.3387.1.S1_at    | LOC_Os10g33810 | myb-related protein Myb4, putative, expressed                                     | 1.03 | up   | 1.31 | up   | 1.07   | down | 1.27 | up   | 1.22  | up   | 3.09 | up   | JA  |
| Os.3389.2.S1_at    | LOC_Os11g03440 | myb-like DNA-binding domain containing protein, putative, expressed               | 1.08 | down | 1.11 | down | 2.45   | down | 1.15 | up   | 1.17  | down | 1.19 | up   | ABA |
| Os.3390.1.S1_at    | LOC_Os07g37210 | MYB family transcription factor, putative, expressed                              | 1.15 | down | 1.16 | down | 12.78  | up   | 1.14 | down | 1.00  | down | 1.05 | down | ABA |

|                    |                |                                                                           |      |      |      |      |        |      |      |      |       |      |      |      |     |
|--------------------|----------------|---------------------------------------------------------------------------|------|------|------|------|--------|------|------|------|-------|------|------|------|-----|
| Os.33939.1.A1_at   | LOC_Os01g04590 | expressed protein                                                         | 1.12 | down | 1.36 | down | 3.66   | up   | 1.06 | down | 1.04  | down | 1.08 | down | ABA |
| Os.3396.1.S1_at    | LOC_Os06g49880 | B-box zinc finger family protein, putative, expressed                     | 2.42 | down | 1.02 | down | 3.29   | down | 1.59 | up   | 1.30  | down | 1.29 | up   | 2   |
| Os.33968.1.S1_at   | LOC_Os01g28840 | C4-dicarboxylate transporter/malic acid transport protein, expressed      | 1.54 | up   | 1.21 | up   | 31.31  | up   | 1.49 | down | 2.31  | up   | 1.21 | down | 2   |
| Os.3406.1.S1_at    | LOC_Os04g51160 | transposon protein, putative, unclassified, expressed                     | 5.13 | up   | 2.11 | up   | 4.44   | up   | 1.38 | down | 6.29  | up   | 1.34 | down | 4   |
| Os.3408.1.A1_x_at  | LOC_Os01g64660 | fructose-1,6-bisphosphatase, putative, expressed                          | 1.46 | up   | 1.09 | down | 2.31   | down | 1.37 | down | 1.15  | down | 1.47 | down | ABA |
| Os.3408.2.S1_at    | LOC_Os01g64670 | soluble inorganic pyrophosphatase, putative, expressed                    | 1.02 | down | 1.05 | down | 11.19  | up   | 1.07 | down | 1.05  | down | 1.38 | down | ABA |
| Os.3409.1.S1_at    | LOC_Os03g59040 | squalene synthetase, putative, expressed                                  | 1.16 | up   | 1.11 | down | 2.46   | up   | 1.07 | up   | 1.00  | up   | 1.26 | down | ABA |
| Os.34118.1.S1_at   | AK072776       | Oryza sativa Japonica Group cDNA clone:J023137P05, full insert sequence.  | 1.17 | down | 1.12 | up   | 3.91   | down | 1.40 | down | 1.81  | down | 1.49 | up   | ABA |
| Os.34130.1.S1_at   | LOC_Os01g66510 | MLO domain containing protein, putative, expressed                        | 1.04 | up   | 1.14 | down | 2.45   | down | 1.34 | up   | 1.38  | down | 2.69 | down | 2   |
| Os.3416.2.S1_x_at  | AY324880       | Oryza sativa (japonica cultivar-group) putative EPSP1 mRNA, partial cds.  | 1.03 | up   | 1.06 | up   | 1.05   | down | 1.30 | up   | 1.29  | up   | 2.02 | up   | JA  |
| Os.34167.1.S1_at   | LOC_Os01g26970 | expressed protein                                                         | 1.29 | up   | 1.06 | down | 2.82   | up   | 1.17 | up   | 1.06  | down | 1.08 | up   | ABA |
| Os.3417.1.S1_at    | LOC_Os01g70860 | esterase, putative, expressed                                             | 1.45 | up   | 1.11 | up   | 4.52   | up   | 1.27 | down | 1.57  | up   | 1.44 | down | ABA |
| Os.3419.1.S1_a_at  | LOC_Os01g50700 | dehydrin family protein, expressed                                        | 1.15 | down | 1.00 | up   | 452.71 | up   | 1.25 | up   | 1.59  | up   | 1.04 | up   | ABA |
| Os.34191.1.S1_at   | LOC_Os07g46630 | AMP deaminase, putative, expressed                                        | 1.10 | down | 1.78 | up   | 6.31   | up   | 1.03 | down | 1.05  | up   | 1.37 | down | ABA |
| Os.34258.1.S1_at   | LOC_Os01g57450 | universal stress protein domain containing protein, putative, expressed   | 1.26 | up   | 1.13 | down | 7.89   | up   | 1.00 | down | 1.65  | up   | 1.05 | down | ABA |
| Os.3428.1.S1_x_at  | LOC_Os02g03060 | cyclin-dependent kinase A-2, putative, expressed                          | 1.04 | down | 1.16 | down | 3.29   | down | 1.06 | up   | 1.29  | down | 1.16 | down | ABA |
| Os.3428.2.S1_at    | LOC_Os02g03060 | cyclin-dependent kinase A-2, putative, expressed                          | 1.64 | down | 1.31 | down | 2.87   | down | 1.06 | down | 1.13  | down | 1.25 | down | ABA |
| Os.34310.1.S1_at   | LOC_Os01g61160 | laccase precursor protein, putative, expressed                            | 1.03 | down | 1.27 | up   | 4.25   | up   | 1.19 | down | 1.31  | up   | 1.22 | down | ABA |
| Os.34356.1.S1_at   | LOC_Os07g45260 | glycosyl transferase 8 domain containing protein, putative, expressed     | 1.02 | down | 1.05 | down | 5.12   | up   | 1.05 | down | 1.71  | up   | 1.46 | up   | ABA |
| Os.34358.1.S1_at   | LOC_Os07g42924 | dehydrogenase, putative, expressed                                        | 1.29 | up   | 1.34 | down | 1.10   | down | 1.18 | down | 6.09  | up   | 2.27 | up   | 2   |
| Os.34372.1.S1_at   | LOC_Os06g48300 | protein phosphatase 2C, putative, expressed                               | 1.03 | up   | 1.22 | down | 149.06 | up   | 1.23 | down | 2.44  | up   | 1.21 | up   | 2   |
| Os.34373.1.S1_at   | LOC_Os12g12580 | NADP-dependent oxidoreductase, putative, expressed                        | 1.27 | down | 1.21 | down | 1.24   | down | 1.86 | down | 1.08  | up   | 2.25 | up   | JA  |
| Os.34438.1.S1_x_at | LOC_Os07g39740 | GDSL-like lipase/acylhydrolase, putative, expressed                       | 1.03 | down | 1.11 | up   | 13.96  | up   | 1.09 | down | 1.11  | down | 1.08 | down | ABA |
| Os.34438.2.A1_x_at | LOC_Os07g39740 | GDSL-like lipase/acylhydrolase, putative, expressed                       | 1.01 | down | 1.02 | up   | 3.82   | up   | 1.00 | down | 1.00  | down | 1.03 | up   | ABA |
| Os.34471.1.S1_at   | LOC_Os01g64310 | no apical meristem protein, putative, expressed                           | 2.78 | up   | 1.11 | up   | 1.60   | down | 1.07 | up   | 1.25  | up   | 1.06 | up   | IAA |
| Os.34493.1.A1_at   | AK071189       | Oryza sativa Japonica Group cDNA clone:J023086G16, full insert sequence.  | 1.02 | down | 1.01 | up   | 8.02   | up   | 1.02 | up   | 1.92  | up   | 1.05 | up   | ABA |
| Os.34496.1.S1_at   | AK071173       | Oryza sativa Japonica Group cDNA clone:J023082F07, full insert sequence.  | 1.31 | down | 1.05 | up   | 3.36   | down | 2.96 | up   | 1.16  | up   | 5.98 | up   | 3   |
| Os.34521.1.S1_at   | LOC_Os03g29810 | OsClp6 - Putative Clp protease homologue, expressed                       | 1.06 | up   | 1.11 | up   | 2.53   | down | 1.28 | down | 1.53  | down | 1.20 | down | ABA |
| Os.34523.1.S1_at   | LOC_Os11g30500 | HVA22, putative, expressed                                                | 1.11 | up   | 1.10 | up   | 25.65  | up   | 1.83 | down | 1.88  | up   | 1.39 | down | ABA |
| Os.34537.1.S1_at   | LOC_Os01g52160 | heavy metal-associated domain containing protein, expressed               | 1.16 | down | 1.59 | down | 2.57   | down | 1.40 | down | 1.51  | down | 2.19 | down | 2   |
| Os.34537.2.S1_x_at | LOC_Os01g52160 | heavy metal-associated domain containing protein, expressed               | 1.25 | down | 1.67 | down | 2.05   | down | 1.26 | down | 1.24  | down | 1.63 | down | ABA |
| Os.34549.1.S1_at   | LOC_Os07g43530 | helix-loop-helix DNA-binding domain containing protein, expressed         | 2.03 | down | 1.52 | down | 3.70   | down | 1.06 | down | 1.27  | up   | 1.05 | up   | 2   |
| Os.34596.1.S1_at   | LOC_Os01g52980 | OsFBX23 - F-box domain containing protein, expressed                      | 1.09 | up   | 1.07 | up   | 6.17   | up   | 1.33 | up   | 1.10  | up   | 1.20 | up   | ABA |
| Os.34673.1.S1_at   | LOC_Os05g34000 | POT family protein, expressed                                             | 1.69 | down | 1.33 | up   | 2.89   | down | 1.10 | down | 1.98  | down | 1.96 | down | ABA |
| Os.34701.1.S1_s_at | LOC_Os03g07130 | RING finger protein 13, putative, expressed                               | 1.12 | up   | 1.19 | down | 2.36   | up   | 1.01 | up   | 1.10  | up   | 1.05 | down | ABA |
| Os.34737.2.S1_x_at | LOC_Os07g46820 | CUG-BP- and ETR-3-like factor 5, putative, expressed                      | 1.24 | down | 3.07 | up   | 1.04   | down | 1.08 | up   | 1.01  | down | 1.01 | up   | BAP |
| Os.34741.1.S1_at   | LOC_Os01g19130 | protein phosphatase 2C, putative, expressed                               | 1.60 | up   | 1.07 | down | 8.42   | up   | 1.06 | down | 2.05  | up   | 1.19 | up   | 2   |
| Os.34767.2.S1_s_at | LOC_Os03g12530 | cation efflux family protein, putative, expressed                         | 1.28 | up   | 1.02 | down | 3.29   | down | 1.31 | down | 1.01  | down | 1.14 | down | ABA |
| Os.34773.1.S1_at   | LOC_Os10g30520 | ras-related protein, putative, expressed                                  | 1.12 | down | 1.02 | up   | 2.00   | up   | 1.04 | down | 1.15  | up   | 1.04 | up   | ABA |
| Os.34789.1.S1_at   | LOC_Os07g11300 | expressed protein                                                         | 1.07 | up   | 1.21 | down | 4.76   | up   | 1.02 | up   | 1.13  | up   | 1.04 | up   | ABA |
| Os.34873.1.S1_at   | LOC_Os07g46510 | expressed protein                                                         | 1.28 | up   | 1.08 | up   | 3.46   | down | 1.17 | up   | 1.32  | down | 1.14 | down | ABA |
| Os.34913.1.S1_at   | LOC_Os01g55160 | expressed protein                                                         | 2.22 | up   | 1.25 | down | 2.74   | up   | 4.49 | up   | 2.84  | up   | 1.29 | up   | 4   |
| Os.34962.1.S1_at   | LOC_Os01g38110 | cytochrome P450, putative, expressed                                      | 1.17 | down | 1.71 | up   | 9.69   | up   | 2.13 | down | 15.91 | up   | 1.76 | up   | 3   |
| Os.34998.1.S1_x_at | LOC_Os01g48850 | auxin-responsive protein, putative, expressed                             | 1.14 | down | 1.12 | down | 1.64   | down | 1.33 | down | 2.25  | down | 1.04 | up   | SA  |
| Os.35005.1.S1_at   | AK069318       | Oryza sativa partial mRNA for putative metallothionein-like protein       | 1.00 | up   | 1.02 | up   | 2.05   | up   | 1.01 | down | 1.03  | down | 1.01 | down | ABA |
| Os.35013.1.S1_at   | LOC_Os03g16170 | protein phosphatase 2C, putative, expressed                               | 2.36 | up   | 1.09 | down | 148.27 | up   | 2.02 | down | 1.21  | up   | 1.11 | up   | 3   |
| Os.35020.1.S1_at   | LOC_Os11g03300 | NAC domain transcription factor, putative, expressed                      | 1.42 | up   | 1.58 | down | 19.30  | up   | 1.31 | up   | 1.28  | up   | 2.62 | up   | 2   |
| Os.35154.1.S1_x_at | LOC_Os04g43390 | Os4bglu16 - monoglucosyl beta-glucoside homologue, expressed              | 1.10 | down | 1.41 | down | 18.67  | up   | 1.93 | down | 1.57  | up   | 1.16 | up   | ABA |
| Os.35247.1.S1_at   | LOC_Os05g32610 | required to maintain repression 1, putative, expressed                    | 1.05 | up   | 1.03 | up   | 4.16   | down | 1.50 | up   | 1.17  | down | 1.12 | down | ABA |
| Os.35273.1.S1_at   | LOC_Os07g29240 | expressed protein                                                         | 1.10 | up   | 1.14 | up   | 4.08   | down | 1.28 | down | 1.57  | down | 1.14 | down | ABA |
| Os.353.1.S1_at     | LOC_Os04g08350 | cysteine synthase, chloroplast/chromoplast precursor, putative, expressed | 1.17 | up   | 1.07 | up   | 2.24   | down | 1.21 | down | 1.28  | up   | 1.09 | down | ABA |
| Os.35300.1.S1_at   | LOC_Os07g40700 | RNA methyltransferase, TrmH family protein, putative, expressed           | 1.26 | down | 1.04 | up   | 3.53   | down | 1.12 | up   | 1.49  | down | 1.12 | down | ABA |
| Os.35365.1.S1_at   | LOC_Os06g30950 | transporter-related, putative, expressed                                  | 1.23 | up   | 1.02 | up   | 3.04   | down | 1.15 | down | 1.63  | down | 1.16 | up   | ABA |
| Os.35425.1.S1_at   | LOC_Os01g61940 | white-brown complex homolog protein, putative, expressed                  | 1.03 | up   | 1.04 | down | 5.30   | up   | 1.02 | up   | 1.81  | up   | 1.14 | down | ABA |
| Os.35451.1.S1_at   | LOC_Os03g19930 | adenylosuccinate lyase, putative, expressed                               | 1.01 | up   | 1.12 | up   | 2.47   | down | 1.15 | up   | 1.36  | down | 1.11 | down | ABA |

|                    |                |                                                                                      |      |      |      |      |         |      |      |      |       |      |       |      |     |
|--------------------|----------------|--------------------------------------------------------------------------------------|------|------|------|------|---------|------|------|------|-------|------|-------|------|-----|
| Os.35495.1.S1_at   | LOC_Os01g16030 | ADP-ribosylation factor, putative, expressed                                         | 1.22 | down | 1.04 | down | 2.13    | down | 1.12 | down | 1.61  | down | 1.36  | up   | ABA |
| Os.35495.1.S1_s_at | LOC_Os01g16030 | ADP-ribosylation factor, putative, expressed                                         | 1.11 | down | 1.05 | down | 2.29    | down | 1.27 | down | 2.03  | down | 1.34  | up   | 2   |
| Os.35510.1.S1_at   | LOC_Os02g01220 | rhodanese-like domain containing protein, putative, expressed                        | 1.94 | up   | 1.40 | down | 2.14    | up   | 1.12 | up   | 1.92  | up   | 1.23  | up   | ABA |
| Os.35524.1.S1_at   | LOC_Os01g65130 | peptide transporter, putative, expressed                                             | 1.08 | down | 1.76 | down | 3.09    | down | 1.24 | up   | 1.13  | down | 1.82  | down | ABA |
| Os.35559.1.S1_at   | AK066880       | NAD-dependent glycerol-3-phosphate dehydrogenase family protein                      | 1.02 | up   | 1.02 | up   | 2.48    | up   | 1.07 | up   | 1.50  | up   | 1.14  | up   | ABA |
| Os.35561.1.S1_x_at | LOC_Os03g01550 | expressed protein                                                                    | 1.37 | up   | 1.39 | down | 3.72    | up   | 1.40 | down | 1.21  | up   | 1.01  | up   | ABA |
| Os.35573.1.S1_at   | LOC_Os01g41240 | hydrolase, alpha/beta fold family domain containing protein, expressed               | 1.08 | down | 1.55 | up   | 1.96    | up   | 1.32 | up   | 2.53  | up   | 1.55  | up   | SA  |
| Os.35606.1.S1_at   | LOC_Os01g01610 | lscA-like iron-sulfur assembly protein, mitochondrial precursor, putative, expressed | 1.12 | down | 1.05 | up   | 2.32    | up   | 1.00 | down | 1.02  | up   | 1.35  | down | ABA |
| Os.3568.1.S1_at    | LOC_Os06g04889 | expressed protein                                                                    | 1.09 | down | 1.10 | down | 10.21   | up   | 1.01 | up   | 1.17  | up   | 1.30  | down | ABA |
| Os.35681.1.S1_at   | LOC_Os01g53220 | HSF-type DNA-binding domain containing protein, expressed                            | 1.67 | up   | 3.05 | up   | 15.23   | up   | 1.02 | down | 1.01  | down | 1.27  | down | 2   |
| Os.35704.2.S1_at   | LOC_Os01g60940 | expressed protein                                                                    | 1.06 | down | 1.35 | down | 5.62    | down | 1.38 | down | 1.82  | down | 1.18  | up   | ABA |
| Os.35707.1.S1_at   | LOC_Os09g33580 | BEE 1, putative, expressed                                                           | 2.70 | up   | 1.19 | up   | 1.99    | down | 1.06 | down | 1.02  | up   | 1.12  | down | IAA |
| Os.35710.1.S1_at   | AK066176       | Oryza sativa Japonica Group cDNA clone:J013056E23, full insert sequence.             | 1.02 | down | 1.19 | up   | 2.31    | up   | 1.03 | up   | 1.08  | up   | 1.17  | up   | ABA |
| Os.35718.1.S1_at   | LOC_Os12g39220 | ZOS12-08 - C2H2 zinc finger protein, expressed                                       | 1.12 | up   | 1.49 | up   | 3.65    | down | 1.19 | down | 1.42  | down | 1.35  | down | ABA |
| Os.35785.1.S1_at   | LOC_Os01g35160 | TKL_IRAK_DUF26-lh.4 - DUF26 kinases have homology to DUF26 containing loci, exp      | 1.43 | down | 1.08 | down | 2.25    | up   | 1.02 | down | 1.00  | up   | 1.10  | up   | ABA |
| Os.35787.1.S1_at   | LOC_Os03g63150 | powdery mildew resistance protein PM3b, putative, expressed                          | 1.06 | down | 1.01 | down | 4.63    | up   | 1.04 | down | 1.05  | down | 1.06  | down | ABA |
| Os.35787.1.S1_x_at | LOC_Os03g63150 | powdery mildew resistance protein PM3b, putative, expressed                          | 1.01 | down | 1.00 | up   | 3.77    | up   | 1.00 | up   | 1.00  | down | 1.01  | up   | ABA |
| Os.35808.1.S1_at   | LOC_Os01g42190 | heat shock protein DnaJ, putative, expressed                                         | 1.56 | up   | 1.17 | up   | 3.77    | up   | 1.36 | down | 1.18  | down | 1.16  | down | ABA |
| Os.3582.1.S1_at    | LOC_Os06g05090 | methyltransferase domain containing protein, expressed                               | 1.16 | up   | 1.30 | up   | 2.93    | down | 1.14 | up   | 1.26  | down | 1.28  | down | ABA |
| Os.35827.1.S1_at   | LOC_Os01g14510 | BRASSINOSTEROID INSENSITIVE 1 precursor, putative, expressed                         | 1.28 | down | 1.44 | down | 11.52   | up   | 1.76 | down | 1.42  | up   | 1.73  | up   | ABA |
| Os.35919.1.S1_s_at | LOC_Os03g60340 | leaf senescence related protein, putative, expressed                                 | 1.08 | down | 1.03 | up   | 2.08    | down | 1.36 | down | 1.26  | down | 1.13  | down | ABA |
| Os.35921.1.S1_at   | LOC_Os01g60730 | RING-H2 finger protein, putative, expressed                                          | 1.51 | up   | 4.01 | up   | 5.81    | up   | 1.06 | up   | 1.22  | down | 1.58  | down | 2   |
| Os.36149.1.S1_x_at | LOC_Os11g23080 | retrotransposon protein, putative, unclassified, expressed                           | 1.02 | up   | 1.02 | up   | 1.02    | up   | 1.04 | up   | 27.17 | up   | 1.22  | up   | SA  |
| Os.36152.1.S1_at   | LOC_Os01g63980 | ZOS1-17 - C2H2 zinc finger protein, expressed                                        | 1.29 | up   | 1.05 | up   | 4.75    | up   | 1.76 | up   | 3.87  | up   | 1.11  | down | 2   |
| Os.36161.1.S1_at   | LOC_Os01g58960 | cytochrome P450, putative, expressed                                                 | 1.01 | down | 1.78 | up   | 2.06    | down | 7.82 | up   | 1.18  | down | 1.84  | down | 2   |
| Os.36278.1.S1_x_at | LOC_Os03g03724 | expressed protein                                                                    | 1.20 | up   | 1.26 | down | 1.58    | down | 1.54 | down | 1.62  | down | 2.12  | down | JA  |
| Os.36280.1.S1_at   | LOC_Os05g45320 | ubiquitin domain-containing protein 1, putative, expressed                           | 1.19 | down | 1.19 | down | 3.74    | up   | 1.01 | up   | 1.23  | up   | 1.18  | down | ABA |
| Os.36307.1.S1_at   | LOC_Os04g35490 | expressed protein                                                                    | 1.00 | down | 1.00 | up   | 1139.85 | up   | 1.00 | up   | 1.00  | up   | 1.02  | up   | ABA |
| Os.3634.1.S1_a_at  | LOC_Os01g13280 | ubiquitin conjugating enzyme protein, putative, expressed                            | 1.01 | up   | 1.09 | down | 5.18    | up   | 1.07 | down | 1.07  | up   | 1.09  | down | ABA |
| Os.36409.1.S1_x_at | AK063499       | Oryza sativa Japonica Group cDNA clone:001-116-E02, full insert sequence.            | 1.02 | down | 1.04 | down | 20.60   | up   | 1.01 | down | 1.03  | up   | 1.04  | up   | ABA |
| Os.36435.1.S1_at   | LOC_Os11g48080 | SOR/SNZ family protein, putative, expressed                                          | 1.15 | down | 1.01 | down | 3.00    | down | 1.05 | up   | 1.57  | down | 1.32  | down | ABA |
| Os.36449.1.S1_at   | LOC_Os01g57610 | OsGH3.1 - Probable indole-3-acetic acid-amido synthetase, expressed                  | 6.11 | up   | 2.17 | down | 1.12    | up   | 1.06 | down | 1.52  | down | 2.55  | down | 3   |
| Os.36458.1.S1_at   | LOC_Os01g14080 | lipase class 3 family protein, putative, expressed                                   | 1.01 | down | 1.03 | down | 2.37    | up   | 1.00 | up   | 1.17  | up   | 1.04  | up   | ABA |
| Os.36458.2.S1_x_at | LOC_Os01g14080 | lipase class 3 family protein, putative, expressed                                   | 1.01 | up   | 1.10 | down | 5.10    | up   | 1.05 | up   | 1.55  | up   | 1.11  | up   | ABA |
| Os.36470.1.S1_at   | LOC_Os07g15320 | leaf senescence related protein, putative, expressed                                 | 2.29 | down | 2.15 | down | 1.11    | down | 1.01 | up   | 1.22  | up   | 1.02  | down | 2   |
| Os.36549.1.S1_at   | CT829079       | Oryza sativa (indica cultivar-group) cDNA clone:OSIGCEA043F20, full insert sequence  | 1.93 | up   | 1.67 | down | 7.59    | down | 1.16 | up   | 1.15  | down | 1.66  | down | ABA |
| Os.3655.1.S1_at    | LOC_Os01g18744 | transferase family protein, putative, expressed                                      | 2.27 | down | 1.61 | down | 11.51   | down | 1.01 | down | 2.27  | down | 1.23  | up   | 3   |
| Os.36558.1.S1_x_at | NM_001072512   | Oryza sativa (japonica cultivar-group) Os12g0114000 (Os12g0114000) mRNA, comple      | 1.18 | up   | 1.19 | up   | 6.14    | up   | 1.01 | up   | 1.56  | up   | 1.41  | down | ABA |
| Os.36651.1.S1_at   | LOC_Os04g43560 | no apical meristem protein, putative, expressed                                      | 2.97 | down | 3.40 | up   | 1.73    | up   | 1.79 | up   | 1.05  | down | 13.01 | down | 3   |
| Os.36663.1.S1_at   | LOC_Os01g27390 | glutathione S-transferase, putative, expressed                                       | 1.56 | down | 1.51 | up   | 15.83   | down | 1.06 | up   | 6.85  | down | 2.02  | down | 3   |
| Os.36687.1.A1_at   | LOC_Os09g10730 | expressed protein                                                                    | 1.00 | down | 1.25 | up   | 3.22    | down | 1.14 | down | 1.08  | down | 1.08  | down | ABA |
| Os.36706.1.S1_at   | LOC_Os07g33660 | expressed protein                                                                    | 1.09 | up   | 1.16 | up   | 3.15    | down | 1.07 | down | 1.61  | down | 1.19  | down | ABA |
| Os.36709.1.S1_at   | LOC_Os01g48710 | heavy metal-associated domain containing protein, expressed                          | 2.77 | down | 1.04 | down | 7.41    | down | 1.18 | down | 1.98  | down | 2.27  | down | 4   |
| Os.36709.1.S1_x_at | LOC_Os01g48710 | heavy metal-associated domain containing protein, expressed                          | 1.85 | down | 1.01 | up   | 6.47    | down | 1.05 | up   | 1.67  | down | 1.92  | down | ABA |
| Os.36756.1.S1_at   | LOC_Os08g06540 | expressed protein                                                                    | 1.09 | down | 1.09 | down | 1.13    | down | 1.28 | down | 2.05  | up   | 1.24  | down | SA  |
| Os.36767.1.S1_at   | LOC_Os01g04330 | OsCML16 - Calmodulin-related calcium sensor protein, expressed                       | 1.11 | up   | 1.11 | up   | 7.09    | up   | 1.52 | down | 1.35  | up   | 1.29  | down | ABA |
| Os.36913.1.S1_at   | LOC_Os10g40530 | LTP146 - Protease inhibitor/seed storage/LTP family protein precursor, expressed     | 1.25 | down | 1.11 | up   | 3.51    | down | 1.09 | down | 1.65  | down | 1.54  | down | ABA |
| Os.36925.1.A1_at   | LOC_Os12g37370 | DNA-directed RNA polymerase II subunit RPB9, putative, expressed                     | 1.12 | down | 1.08 | up   | 2.11    | down | 1.01 | up   | 1.33  | down | 1.36  | down | ABA |
| Os.36969.1.S1_at   | LOC_Os04g02880 | expressed protein                                                                    | 2.01 | up   | 1.62 | up   | 10.02   | down | 1.49 | down | 1.70  | down | 2.70  | down | 3   |
| Os.37006.1.S1_at   | LOC_Os06g11660 | phosphate-induced protein 1 conserved region domain containing protein, expressed    | 1.09 | up   | 1.42 | up   | 2.65    | up   | 1.54 | up   | 1.77  | up   | 1.49  | down | ABA |
| Os.37062.2.S1_x_at | LOC_Os01g29280 | expressed protein                                                                    | 1.04 | up   | 1.05 | up   | 1.14    | down | 1.12 | up   | 1.05  | up   | 3.09  | up   | JA  |
| Os.37066.1.S1_at   | LOC_Os01g07500 | alliin lyase precursor, putative, expressed                                          | 1.32 | up   | 2.03 | up   | 3.23    | down | 1.02 | down | 1.09  | up   | 1.56  | down | 2   |
| Os.37089.1.S1_at   | LOC_Os07g04040 | expressed protein                                                                    | 1.00 | down | 1.19 | down | 2.70    | up   | 1.05 | up   | 1.06  | up   | 1.03  | up   | ABA |
| Os.372.1.S1_a_at   | LOC_Os04g40874 | glucose-6-phosphate 1-dehydrogenase, cytoplasmic isoform, putative, expressed        | 1.05 | up   | 1.21 | up   | 2.34    | down | 1.16 | up   | 1.30  | down | 1.05  | down | ABA |
| Os.3721.1.S1_at    | LOC_Os01g03980 | expressed protein                                                                    | 1.39 | down | 1.28 | down | 2.25    | down | 1.75 | up   | 1.33  | up   | 1.06  | down | ABA |



|                    |                |                                                                              |      |      |       |      |       |      |      |      |       |      |      |      |     |
|--------------------|----------------|------------------------------------------------------------------------------|------|------|-------|------|-------|------|------|------|-------|------|------|------|-----|
| Os.37217.1.S1_at   | AK070075       | Oryza sativa Japonica Group cDNA clone:J023044P22, full insert sequence.     | 1.67 | down | 1.70  | down | 6.75  | up   | 2.24 | down | 2.60  | down | 1.85 | down | 3   |
| Os.37225.1.S1_at   | LOC_Os07g27810 | fiber protein Fb34, putative, expressed                                      | 1.01 | up   | 1.10  | down | 3.11  | down | 1.29 | down | 1.88  | down | 1.17 | up   | ABA |
| Os.37229.1.S1_at   | LOC_Os02g46210 | DUF581 domain containing protein, expressed                                  | 2.05 | up   | 2.25  | up   | 9.29  | up   | 1.10 | down | 1.28  | down | 1.06 | down | 3   |
| Os.37247.1.S1_at   | LOC_Os11g02450 | elongation factor P, putative, expressed                                     | 1.17 | up   | 1.16  | up   | 3.99  | down | 1.25 | down | 1.87  | down | 1.00 | up   | ABA |
| Os.37285.1.S1_at   | LOC_Os05g03530 | tetraspanin family protein, putative, expressed                              | 1.63 | down | 1.01  | down | 1.35  | down | 1.28 | down | 1.10  | down | 2.00 | down | JA  |
| Os.37303.1.S1_at   | LOC_Os07g48100 | CAMK_KIN1                                                                    | 1.44 | up   | 1.00  | up   | 2.61  | up   | 1.07 | up   | 1.17  | up   | 1.18 | up   | ABA |
| Os.37318.1.S1_at   | AK059315       | Oryza sativa Japonica Group cDNA clone:001-025-H02, full insert sequence.    | 1.15 | down | 1.57  | down | 2.08  | down | 1.03 | up   | 1.15  | up   | 1.40 | down | ABA |
| Os.37320.1.S1_at   | LOC_Os03g62950 | expressed protein                                                            | 1.14 | up   | 1.08  | up   | 3.53  | down | 1.16 | down | 1.59  | down | 1.46 | down | ABA |
| Os.37320.2.S1_at   | LOC_Os03g62950 | expressed protein                                                            | 1.23 | up   | 1.14  | up   | 3.64  | down | 1.15 | down | 1.58  | down | 1.37 | down | ABA |
| Os.37320.2.S1_x_at | LOC_Os03g62950 | expressed protein                                                            | 1.25 | up   | 1.14  | up   | 3.56  | down | 1.19 | down | 1.62  | down | 1.46 | down | ABA |
| Os.37328.1.S1_at   | LOC_Os01g72740 | cytochrome P450, putative, expressed                                         | 1.06 | down | 1.45  | down | 2.63  | down | 1.26 | down | 1.33  | up   | 1.86 | up   | ABA |
| Os.3738.1.S1_s_at  | LOC_Os11g08314 | methyltransferase, putative, expressed                                       | 1.03 | down | 1.03  | down | 3.72  | down | 1.22 | down | 2.05  | down | 1.96 | down | 3   |
| Os.37430.1.S1_at   | LOC_Os11g04720 | OsRR10 type-A response regulator, expressed                                  | 2.81 | down | 12.09 | up   | 15.69 | down | 1.31 | down | 4.65  | down | 3.33 | down | 5   |
| Os.37438.1.S1_at   | LOC_Os01g65420 | expressed protein                                                            | 1.90 | up   | 2.74  | up   | 4.04  | down | 1.39 | down | 1.08  | down | 1.38 | down | 2   |
| Os.37457.1.S1_at   | LOC_Os07g44780 | GDSL-like lipase/acylhydrolase, putative, expressed                          | 1.18 | down | 2.55  | up   | 4.62  | down | 1.68 | down | 1.21  | down | 1.84 | up   | 2   |
| Os.37509.1.S1_at   | LOC_Os01g50040 | DNA binding protein, putative, expressed                                     | 1.39 | up   | 1.21  | up   | 2.65  | up   | 1.28 | up   | 1.29  | up   | 1.45 | up   | ABA |
| Os.37531.1.S1_at   | LOC_Os06g33330 | powdery mildew resistant protein 5, putative, expressed                      | 1.91 | up   | 1.08  | up   | 11.42 | up   | 1.91 | down | 1.14  | down | 1.37 | down | ABA |
| Os.37548.1.S1_at   | LOC_Os05g34830 | No apical meristem protein, putative, expressed                              | 1.52 | up   | 1.40  | down | 25.88 | up   | 1.36 | up   | 3.06  | up   | 2.49 | up   | 3   |
| Os.37558.1.S1_at   | LOC_Os01g06630 | small hydrophilic plant seed protein, putative, expressed                    | 1.03 | down | 1.01  | down | 24.57 | up   | 1.00 | up   | 1.03  | up   | 1.01 | up   | ABA |
| Os.37562.1.A1_x_at | D85512         | Oryza sativa Japonica Group CP26 mRNA, partial sequence.                     | 1.12 | up   | 1.02  | up   | 2.78  | down | 1.12 | down | 1.14  | down | 1.12 | down | ABA |
| Os.37565.1.S1_at   | LOC_Os05g25770 | OsWRKY45 - Superfamily of TFs having WRKY and zinc finger domains, expressed | 1.46 | up   | 1.07  | up   | 5.84  | down | 1.19 | down | 2.19  | up   | 1.20 | up   | 2   |
| Os.37565.2.S1_at   | LOC_Os05g25770 | OsWRKY45 - Superfamily of TFs having WRKY and zinc finger domains, expressed | 1.10 | down | 1.02  | up   | 4.40  | down | 1.16 | up   | 1.63  | up   | 1.07 | up   | ABA |
| Os.37571.1.S1_at   | LOC_Os08g37660 | plastocyanin-like domain containing protein, putative, expressed             | 1.57 | up   | 1.54  | up   | 4.46  | down | 2.69 | up   | 2.21  | up   | 2.56 | up   | 4   |
| Os.37603.1.S1_at   | LOC_Os01g63480 | transferase family protein, putative, expressed                              | 1.12 | up   | 1.68  | down | 3.43  | up   | 6.47 | up   | 1.11  | up   | 2.45 | up   | 3   |
| Os.37617.1.S1_at   | LOC_Os01g39860 | 1-aminocyclopropane-1-carboxylate oxidase protein, putative, expressed       | 1.22 | down | 2.36  | up   | 4.26  | down | 3.31 | up   | 3.58  | down | 2.58 | down | 5   |
| Os.37620.1.S1_at   | LOC_Os01g55820 | X8 domain containing protein, expressed                                      | 2.98 | up   | 1.44  | down | 1.39  | up   | 1.05 | down | 1.47  | down | 1.10 | up   | IAA |
| Os.3766.1.S1_at    | LOC_Os01g58420 | AP2 domain containing protein, expressed                                     | 1.59 | up   | 1.03  | up   | 2.99  | up   | 1.11 | down | 1.13  | up   | 1.00 | up   | ABA |
| Os.37668.1.S1_at   | LOC_Os01g43844 | cytochrome P450 72A1, putative, expressed                                    | 1.30 | up   | 1.03  | up   | 6.58  | down | 1.35 | up   | 1.81  | down | 1.92 | up   | ABA |
| Os.37687.1.A1_at   | LOC_Os05g04150 | expressed protein                                                            | 1.02 | up   | 1.18  | up   | 6.34  | up   | 1.15 | down | 1.01  | up   | 1.06 | down | ABA |
| Os.37699.2.S1_at   | LOC_Os03g16334 | fringe-related protein, putative, expressed                                  | 1.33 | up   | 1.39  | down | 4.22  | up   | 1.04 | down | 1.02  | down | 1.05 | down | ABA |
| Os.37710.1.S1_at   | AK066299       | Oryza sativa Japonica Group cDNA clone:J013059M19, full insert sequence.     | 1.22 | down | 1.35  | down | 2.80  | down | 1.25 | up   | 1.25  | down | 1.24 | up   | ABA |
| Os.37717.1.A2_s_at | LOC_Os05g15770 | glycosyl hydrolase, putative, expressed                                      | 1.17 | up   | 2.06  | up   | 1.71  | up   | 1.08 | down | 1.18  | up   | 1.58 | up   | BAP |
| Os.37718.1.S1_at   | LOC_Os10g26940 | BURP domain containing protein, expressed                                    | 1.12 | up   | 1.05  | down | 2.29  | down | 1.37 | up   | 1.20  | down | 1.11 | up   | ABA |
| Os.37728.1.S1_x_at | LOC_Os08g38170 | methyladenine glycosylase, putative, expressed                               | 1.17 | up   | 1.16  | up   | 4.80  | down | 1.25 | down | 1.86  | down | 1.30 | down | ABA |
| Os.37754.1.S1_at   | AK058554       | probable peroxidase (EC 1.11.1.7), cationic                                  | 2.26 | down | 1.35  | down | 9.37  | down | 1.34 | down | 4.12  | down | 1.19 | up   | 3   |
| Os.37773.1.S1_at   | LOC_Os03g16030 | hsp20/alpha crystallin family protein, putative, expressed                   | 1.24 | up   | 1.45  | down | 1.26  | up   | 1.02 | up   | 85.50 | up   | 2.53 | up   | 2   |
| Os.37773.1.S1_x_at | LOC_Os03g16030 | hsp20/alpha crystallin family protein, putative, expressed                   | 1.02 | up   | 1.06  | down | 1.37  | up   | 1.05 | down | 79.45 | up   | 1.99 | up   | SA  |
| Os.37872.1.S1_at   | LOC_Os06g08280 | protein kinase domain containing protein, expressed                          | 1.34 | up   | 1.20  | down | 6.42  | up   | 1.07 | up   | 2.07  | up   | 1.08 | up   | 2   |
| Os.37876.1.S1_at   | LOC_Os10g39920 | expressed protein                                                            | 2.21 | up   | 1.21  | up   | 10.75 | up   | 1.60 | up   | 2.11  | up   | 1.13 | up   | 3   |
| Os.37902.1.S1_at   | LOC_Os03g30250 | COBRA-like protein precursor, putative, expressed                            | 1.05 | down | 1.34  | up   | 6.75  | down | 1.24 | down | 2.58  | down | 1.13 | up   | 2   |
| Os.37909.1.S1_at   | LOC_Os05g27780 | expressed protein                                                            | 1.05 | up   | 1.23  | up   | 3.10  | up   | 1.21 | up   | 1.27  | up   | 1.26 | down | ABA |
| Os.37967.1.S1_at   | LOC_Os07g42420 | 3-oxoacyl-synthase, putative, expressed                                      | 1.03 | down | 1.24  | up   | 2.16  | down | 1.18 | down | 1.72  | down | 1.12 | down | ABA |
| Os.38014.1.S1_at   | LOC_Os01g14100 | BT1 family protein, putative, expressed                                      | 1.12 | up   | 1.26  | down | 4.43  | up   | 1.09 | up   | 1.58  | up   | 1.45 | up   | ABA |
| Os.38017.1.S1_s_at | LOC_Os05g31750 | annexin, putative, expressed                                                 | 1.18 | up   | 1.10  | down | 3.72  | down | 1.48 | down | 1.35  | down | 4.31 | up   | 2   |
| Os.38021.1.S1_at   | LOC_Os07g43950 | RNA recognition motif containing protein, putative, expressed                | 1.07 | down | 1.13  | up   | 11.60 | up   | 1.12 | up   | 1.47  | up   | 1.08 | up   | ABA |
| Os.38022.1.S1_at   | LOC_Os01g49710 | glutathione S-transferase, putative, expressed                               | 1.12 | up   | 1.00  | up   | 4.81  | up   | 1.23 | down | 3.17  | up   | 1.09 | up   | 2   |
| Os.38022.2.S1_x_at | LOC_Os01g49710 | glutathione S-transferase, putative, expressed                               | 1.50 | up   | 1.29  | up   | 2.97  | up   | 1.05 | down | 1.80  | up   | 1.03 | up   | ABA |
| Os.38045.1.S1_at   | LOC_Os12g08810 | VTC2, putative, expressed                                                    | 1.15 | up   | 1.25  | down | 2.28  | down | 1.02 | down | 1.60  | up   | 1.75 | up   | ABA |
| Os.38090.1.S1_at   | LOC_Os01g37820 | oxidoreductase/transition metal ion binding protein, putative, expressed     | 1.01 | down | 1.21  | up   | 2.65  | down | 1.13 | down | 1.64  | down | 1.24 | down | ABA |
| Os.38090.2.S1_x_at | LOC_Os01g37820 | oxidoreductase/transition metal ion binding protein, putative, expressed     | 1.05 | up   | 1.18  | up   | 2.23  | down | 1.01 | down | 1.63  | down | 1.15 | down | ABA |
| Os.38099.1.S1_at   | LOC_Os03g61270 | OsMan04 - Endo-Beta-Mannanase, expressed                                     | 1.47 | down | 1.23  | up   | 36.38 | down | 1.09 | down | 1.16  | down | 1.41 | down | ABA |
| Os.38099.2.S1_x_at | LOC_Os03g61270 | OsMan04 - Endo-Beta-Mannanase, expressed                                     | 1.01 | down | 1.00  | down | 35.06 | up   | 1.02 | up   | 1.13  | down | 1.03 | down | ABA |
| Os.38152.1.S1_x_at | LOC_Os10g42780 | lrgB-like family protein, expressed                                          | 1.21 | up   | 1.15  | down | 2.56  | down | 1.06 | up   | 1.45  | down | 1.06 | up   | ABA |
| Os.38157.1.S1_at   | LOC_Os09g39910 | ABC transporter, ATP-binding protein, putative, expressed                    | 1.04 | up   | 1.06  | down | 9.17  | up   | 1.06 | up   | 1.38  | up   | 1.42 | up   | ABA |
| Os.38157.1.S1_s_at | LOC_Os09g39910 | ABC transporter, ATP-binding protein, putative, expressed                    | 1.24 | up   | 1.34  | down | 14.55 | up   | 1.26 | up   | 2.12  | up   | 1.90 | up   | 2   |

|                    |                |                                                                                     |      |      |      |      |       |      |      |      |       |      |      |      |     |
|--------------------|----------------|-------------------------------------------------------------------------------------|------|------|------|------|-------|------|------|------|-------|------|------|------|-----|
| Os.38169.1.S1_a_at | LOC_Os02g43110 | sodium/calcium exchanger 1 precursor, putative, expressed                           | 1.24 | up   | 1.08 | down | 1.54  | down | 2.11 | down | 1.03  | down | 2.24 | up   | 2   |
| Os.38169.1.S1_at   | LOC_Os02g43100 | hypothetical protein                                                                | 1.27 | up   | 1.05 | up   | 1.65  | down | 2.06 | down | 1.05  | up   | 2.25 | up   | 2   |
| Os.38179.2.S1_at   | LOC_Os12g42070 | OsWAK129b - OsWAK receptor-like protein kinase, expressed                           | 1.12 | down | 1.14 | up   | 2.73  | down | 1.10 | up   | 1.66  | down | 1.26 | down | ABA |
| Os.38258.1.S1_x_at | LOC_Os01g56070 | RING finger protein, putative, expressed                                            | 1.09 | up   | 1.18 | down | 2.41  | up   | 1.19 | up   | 1.16  | up   | 1.18 | up   | ABA |
| Os.38258.2.S1_at   | LOC_Os01g56070 | RING finger protein, putative, expressed                                            | 1.23 | down | 1.18 | down | 2.34  | up   | 1.08 | up   | 1.21  | up   | 1.13 | down | ABA |
| Os.38269.1.S1_x_at | AK060977       | Oryza sativa Japonica Group cDNA clone:006-202-F05, full insert sequence.           | 1.01 | up   | 1.01 | up   | 3.08  | up   | 1.06 | down | 1.08  | down | 1.09 | down | ABA |
| Os.38283.1.S1_a_at | LOC_Os05g41550 | expressed protein                                                                   | 1.63 | up   | 1.01 | down | 2.19  | up   | 1.22 | down | 1.36  | up   | 1.04 | down | ABA |
| Os.38283.1.S2_a_at | LOC_Os05g41550 | expressed protein                                                                   | 1.16 | up   | 1.12 | down | 2.28  | up   | 1.12 | up   | 1.57  | up   | 1.26 | up   | ABA |
| Os.38285.1.A1_at   | LOC_Os07g36820 | uncharacterized Cys-rich domain containing protein, putative, expressed             | 1.18 | down | 1.00 | down | 2.33  | up   | 1.06 | up   | 1.43  | up   | 1.33 | up   | ABA |
| Os.38309.1.S1_at   | LOC_Os06g36390 | expressed protein                                                                   | 1.06 | up   | 2.59 | up   | 3.06  | up   | 1.24 | up   | 1.79  | up   | 2.07 | down | 3   |
| Os.38312.2.S1_x_at | LOC_Os01g04860 | DUF647 domain containing protein, putative, expressed                               | 1.38 | up   | 1.14 | up   | 2.70  | down | 1.09 | down | 1.29  | down | 1.23 | down | ABA |
| Os.38330.2.S1_at   | LOC_Os01g56010 | serpin domain containing protein, putative, expressed                               | 1.02 | up   | 1.20 | down | 46.93 | up   | 1.01 | down | 1.62  | up   | 1.76 | down | ABA |
| Os.38339.1.S1_at   | LOC_Os05g33960 | peptide transporter PTR2, putative, expressed                                       | 1.49 | down | 1.23 | down | 17.96 | up   | 1.67 | up   | 2.76  | up   | 1.33 | up   | 2   |
| Os.38340.1.S1_at   | LOC_Os03g55990 | homeobox domain containing protein, expressed                                       | 1.23 | down | 1.17 | down | 4.83  | up   | 1.02 | down | 1.17  | up   | 1.11 | down | ABA |
| Os.38367.1.S1_s_at | LOC_Os03g51050 | peptide transporter PTR2, putative, expressed                                       | 1.13 | down | 1.10 | down | 2.56  | up   | 1.03 | down | 1.11  | up   | 1.05 | down | ABA |
| Os.38381.1.S1_at   | LOC_Os01g20830 | heavy metal-associated domain containing protein, expressed                         | 1.21 | down | 2.21 | up   | 16.31 | down | 1.14 | up   | 4.20  | down | 2.72 | down | 4   |
| Os.38399.1.S1_at   | LOC_Os03g02685 | lysM domain containing protein, putative, expressed                                 | 1.31 | up   | 1.30 | down | 4.38  | up   | 1.07 | down | 1.04  | up   | 1.20 | up   | ABA |
| Os.38447.1.S1_s_at | LOC_Os06g07030 | AP2 domain containing protein, expressed                                            | 1.12 | down | 1.48 | down | 4.41  | up   | 1.27 | up   | 1.35  | up   | 1.25 | up   | ABA |
| Os.38485.1.S1_at   | LOC_Os03g26910 | uncharacterized glycosyl hydrolase Rv2006/MT2062, putative, expressed               | 1.59 | up   | 1.10 | up   | 2.69  | up   | 1.31 | up   | 1.22  | up   | 1.03 | up   | ABA |
| Os.38581.1.S1_s_at | LOC_Os05g38530 | DnaK family protein, putative, expressed                                            | 1.24 | down | 1.02 | down | 15.66 | up   | 1.19 | up   | 4.78  | up   | 1.14 | down | 2   |
| Os.38599.3.S1_a_at | LOC_Os05g03460 | protein kinase, putative, expressed                                                 | 1.16 | up   | 1.03 | up   | 6.26  | up   | 1.28 | up   | 1.92  | up   | 1.54 | up   | ABA |
| Os.38638.1.S1_at   | LOC_Os06g04990 | early nodulin 93 ENOD93 protein, putative, expressed                                | 2.42 | down | 1.36 | up   | 4.83  | up   | 1.42 | up   | 1.77  | up   | 1.62 | down | 2   |
| Os.38638.3.S1_x_at | LOC_Os06g04990 | early nodulin 93 ENOD93 protein, putative, expressed                                | 2.15 | down | 1.15 | up   | 3.16  | up   | 1.00 | up   | 2.28  | up   | 1.00 | down | 3   |
| Os.38638.4.S1_s_at | LOC_Os06g05020 | early nodulin 93 ENOD93 protein, putative, expressed                                | 3.00 | down | 1.11 | up   | 1.19  | down | 1.36 | up   | 2.16  | up   | 1.64 | down | 2   |
| Os.38806.1.A1_x_at | LOC_Os06g04230 | expressed protein                                                                   | 4.13 | up   | 1.23 | up   | 5.53  | up   | 1.02 | up   | 1.08  | down | 1.14 | up   | 2   |
| Os.38848.1.S1_at   | LOC_Os06g15330 | CCT/B-box zinc finger protein, putative, expressed                                  | 1.11 | down | 1.26 | up   | 10.15 | down | 1.04 | down | 1.87  | down | 1.47 | down | ABA |
| Os.38849.1.S1_at   | LOC_Os02g51620 | glycosyl hydrolase family 3 protein, putative, expressed                            | 1.04 | up   | 1.14 | down | 2.76  | down | 1.49 | down | 1.47  | down | 1.09 | down | ABA |
| Os.38856.1.A1_s_at | LOC_Os01g67950 | ubiquitin family protein, putative, expressed                                       | 3.22 | down | 1.18 | up   | 2.46  | down | 1.00 | down | 1.02  | up   | 1.06 | up   | 2   |
| Os.3887.1.S1_at    | LOC_Os05g02820 | protein transport protein-related, putative, expressed                              | 1.07 | down | 1.18 | down | 2.31  | down | 1.16 | down | 1.45  | down | 1.04 | up   | ABA |
| Os.38985.1.S1_at   | LOC_Os07g02060 | OsWRKY29 - Superfamily of TFs having WRKY and zinc finger domains, expressed        | 1.69 | down | 1.19 | up   | 5.07  | down | 1.07 | up   | 1.24  | down | 1.46 | down | ABA |
| Os.38992.1.A1_x_at | LOC_Os08g45120 | hypothetical protein                                                                | 1.67 | down | 1.90 | down | 3.03  | up   | 1.28 | up   | 28.11 | up   | 1.40 | up   | 2   |
| Os.38999.1.S1_at   | LOC_Os12g27830 | dehydrogenase/reductase, putative, expressed                                        | 1.01 | down | 1.00 | down | 12.55 | up   | 1.00 | down | 1.01  | down | 1.02 | up   | ABA |
| Os.39000.1.S1_at   | CF314194       | ---                                                                                 | 1.13 | up   | 1.09 | down | 3.38  | up   | 1.15 | down | 1.28  | up   | 1.10 | down | ABA |
| Os.39043.1.S1_s_at | LOC_Os10g42960 | urea active transporter, putative, expressed                                        | 1.08 | down | 1.65 | down | 20.51 | down | 1.33 | down | 9.30  | down | 1.52 | down | 2   |
| Os.39055.2.A1_x_at | LOC_Os06g51150 | catalase isozyme B, putative, expressed                                             | 2.04 | down | 1.30 | down | 1.41  | up   | 1.27 | up   | 1.26  | up   | 1.22 | up   | IAA |
| Os.39069.1.A1_at   | LOC_Os07g08669 | expressed protein                                                                   | 1.58 | down | 1.52 | down | 5.01  | up   | 1.04 | down | 1.13  | up   | 1.01 | up   | ABA |
| Os.39087.1.S1_at   | LOC_Os01g14550 | pathogen-related protein, putative, expressed                                       | 1.06 | up   | 1.18 | up   | 1.94  | down | 1.94 | up   | 1.35  | up   | 7.48 | up   | JA  |
| Os.39128.1.A1_at   | CT836262       | Oryza sativa (indica cultivar-group) cDNA clone:OSIGCRA117L16, full insert sequence | 1.23 | up   | 1.10 | up   | 2.19  | down | 1.13 | down | 1.80  | down | 1.45 | down | ABA |
| Os.39129.1.S1_at   | LOC_Os10g33760 | No apical meristem protein, putative, expressed                                     | 1.41 | down | 1.48 | up   | 5.02  | up   | 1.15 | up   | 1.38  | down | 1.52 | down | ABA |
| Os.39214.1.S1_at   | LOC_Os10g38090 | cytochrome P450, putative, expressed                                                | 1.02 | up   | 1.41 | up   | 4.20  | up   | 1.45 | down | 1.81  | up   | 1.09 | down | ABA |
| Os.3927.1.S1_x_at  | LOC_Os01g15000 | lipase, putative, expressed                                                         | 1.14 | up   | 1.05 | down | 8.16  | up   | 1.05 | down | 1.42  | up   | 1.00 | up   | ABA |
| Os.3927.2.S1_s_at  | LOC_Os01g15000 | lipase, putative, expressed                                                         | 1.17 | down | 1.03 | up   | 7.54  | up   | 1.06 | down | 1.50  | up   | 1.08 | up   | ABA |
| Os.3927.3.S1_x_at  | LOC_Os01g15000 | lipase, putative, expressed                                                         | 1.20 | up   | 1.05 | down | 15.34 | up   | 1.05 | up   | 1.76  | up   | 1.49 | up   | ABA |
| Os.39552.1.A1_s_at | LOC_Os06g48300 | protein phosphatase 2C, putative, expressed                                         | 1.00 | down | 1.14 | down | 53.72 | up   | 1.01 | up   | 1.49  | up   | 1.08 | up   | ABA |
| Os.39617.1.S1_at   | LOC_Os09g29660 | white-brown complex homolog protein 11, putative, expressed                         | 1.05 | down | 1.04 | down | 1.50  | up   | 1.36 | up   | 1.22  | up   | 7.17 | up   | JA  |
| Os.39725.1.S1_at   | LOC_Os12g30680 | retrotransposon protein, putative, unclassified                                     | 1.03 | up   | 1.06 | down | 1.10  | up   | 1.17 | up   | 12.87 | up   | 1.20 | up   | SA  |
| Os.39973.1.S1_s_at | LOC_Os03g60580 | actin-depolymerizing factor, putative, expressed                                    | 1.50 | down | 1.23 | down | 39.78 | up   | 1.71 | down | 5.16  | up   | 1.28 | up   | 2   |
| Os.39994.1.S1_at   | LOC_Os01g39136 | retrotransposon protein, putative, unclassified, expressed                          | 1.00 | down | 1.00 | up   | 1.04  | down | 1.00 | up   | 22.79 | up   | 1.14 | up   | SA  |
| Os.39995.1.S1_x_at | AK241103       | Oryza sativa Japonica Group cDNA, clone: J065079A13, full insert sequence.          | 1.05 | down | 1.03 | down | 2.31  | up   | 1.00 | down | 7.82  | up   | 1.03 | up   | 2   |
| Os.39998.1.A1_x_at | LOC_Os04g53970 | hypothetical protein                                                                | 1.53 | up   | 1.65 | up   | 2.20  | up   | 1.57 | up   | 1.02  | up   | 1.51 | down | ABA |
| Os.40007.1.S1_x_at | CB636581       | ---                                                                                 | 1.02 | down | 1.03 | down | 1.04  | up   | 1.04 | up   | 22.33 | up   | 1.21 | up   | SA  |
| Os.40015.1.S1_at   | LOC_Os01g43590 | HSF-type DNA-binding domain containing protein, expressed                           | 2.57 | up   | 2.04 | up   | 6.11  | up   | 1.79 | down | 1.36  | up   | 1.35 | up   | 3   |
| Os.40106.1.A1_s_at | LOC_Os08g42600 | retinoblastoma-related protein-like, putative, expressed                            | 1.52 | down | 1.14 | down | 4.70  | down | 1.03 | up   | 1.88  | down | 1.45 | down | ABA |
| Os.40139.1.A1_x_at | AF022734       | Oryza sativa zinc inducible protein mRNA, complete cds.                             | 1.02 | up   | 1.14 | up   | 3.28  | up   | 1.02 | down | 1.64  | up   | 1.51 | up   | ABA |
| Os.40244.1.S1_at   | LOC_Os11g31940 | GDSL-like lipase/acylhydrolase, putative, expressed                                 | 1.17 | up   | 1.37 | up   | 3.48  | up   | 1.10 | down | 1.30  | up   | 1.08 | down | ABA |

|                    |                |                                                                                        |      |      |        |      |       |      |      |      |      |      |      |      |     |
|--------------------|----------------|----------------------------------------------------------------------------------------|------|------|--------|------|-------|------|------|------|------|------|------|------|-----|
| Os.40342.1.A1_s_at | LOC_Os06g18900 | cadmium tolerance factor, putative, expressed                                          | 1.12 | down | 1.11   | down | 3.25  | down | 1.44 | up   | 1.13 | down | 1.17 | up   | ABA |
| Os.40388.2.S1_s_at | LOC_Os03g01110 | RNA methyltransferase, TrmH family protein, putative, expressed                        | 1.20 | down | 1.13   | down | 1.76  | up   | 1.61 | up   | 1.32 | up   | 2.30 | up   | JA  |
| Os.40417.1.A1_at   | LOC_Os07g14740 | harpin-induced protein 1 domain containing protein, expressed                          | 1.46 | down | 1.20   | down | 13.32 | down | 1.36 | up   | 1.06 | down | 1.71 | down | ABA |
| Os.40419.1.S1_at   | LOC_Os03g12230 | calcosin related protein, putative, expressed                                          | 1.01 | down | 1.02   | up   | 28.77 | up   | 1.03 | up   | 1.00 | down | 1.03 | up   | ABA |
| Os.40426.1.S1_x_at | LOC_Os08g06280 | LSD1 zinc finger domain containing protein, expressed                                  | 1.29 | down | 1.08   | down | 2.78  | down | 1.01 | up   | 1.15 | down | 1.17 | down | ABA |
| Os.40947.1.A1_at   | LOC_Os01g36660 | carboxyl-terminal peptidase, putative, expressed                                       | 1.01 | up   | 1.02   | up   | 2.23  | down | 1.07 | down | 1.00 | up   | 1.19 | up   | ABA |
| Os.411.1.S1_a_at   | LOC_Os01g64730 | bZIP transcription factor domain containing protein, expressed                         | 1.11 | down | 1.36   | down | 9.90  | up   | 2.05 | up   | 1.29 | up   | 1.12 | up   | 2   |
| Os.411.1.S1_at     | LOC_Os01g64730 | bZIP transcription factor domain containing protein, expressed                         | 1.44 | down | 1.40   | down | 13.67 | up   | 2.02 | up   | 1.32 | up   | 1.07 | down | 2   |
| Os.411.2.S1_x_at   | LOC_Os01g64730 | bZIP transcription factor domain containing protein, expressed                         | 1.16 | down | 1.14   | down | 9.11  | up   | 1.48 | up   | 1.19 | up   | 1.01 | down | ABA |
| Os.41257.1.S1_at   | LOC_Os01g43040 | amino acid transporter, putative, expressed                                            | 1.14 | down | 1.04   | down | 2.21  | down | 1.04 | up   | 1.13 | down | 1.13 | down | ABA |
| Os.413.1.S1_at     | LOC_Os01g46970 | transcription factor, putative, expressed                                              | 1.11 | up   | 1.46   | down | 33.92 | up   | 1.21 | down | 1.44 | up   | 1.17 | down | ABA |
| Os.41516.1.S1_at   | NM_192393      | ---                                                                                    | 1.01 | up   | 1.01   | down | 2.53  | up   | 1.01 | up   | 1.00 | up   | 1.03 | down | ABA |
| Os.4154.1.S1_at    | LOC_Os02g56850 | glutathione reductase, putative, expressed                                             | 1.39 | up   | 1.01   | up   | 1.95  | up   | 1.23 | up   | 2.70 | up   | 1.36 | up   | SA  |
| Os.4159.1.S1_at    | LOC_Os01g51570 | glycosyl hydrolases family 17, putative, expressed                                     | 1.12 | down | 1.09   | down | 4.60  | down | 1.30 | up   | 1.35 | down | 1.41 | up   | ABA |
| Os.4161.1.S1_at    | LOC_Os05g46580 | polyprenyl synthetase, putative, expressed                                             | 1.24 | down | 1.12   | down | 2.05  | down | 1.06 | down | 1.41 | down | 1.04 | up   | ABA |
| Os.4166.1.S1_at    | LOC_Os05g50380 | glucose-1-phosphate adenylyltransferase large subunit, chloroplast precursor, putative | 1.22 | up   | 1.10   | up   | 7.54  | up   | 1.01 | up   | 1.13 | down | 1.37 | up   | ABA |
| Os.41694.1.S1_at   | LOC_Os01g49120 | MATE efflux family protein, putative, expressed                                        | 1.05 | up   | 1.07   | up   | 2.22  | down | 1.06 | down | 1.14 | down | 1.71 | up   | ABA |
| Os.4170.1.S1_at    | LOC_Os02g13380 | early nodulin 93 ENOD93 protein, putative, expressed                                   | 1.78 | up   | 1.02   | down | 1.61  | up   | 1.21 | up   | 2.99 | up   | 2.16 | up   | 2   |
| Os.41774.1.S1_at   | LOC_Os01g47900 | S-locus-like receptor protein kinase, putative, expressed                              | 1.42 | down | 1.74   | down | 2.85  | down | 1.28 | up   | 1.21 | down | 1.10 | down | ABA |
| Os.4179.1.S1_at    | AB023498       | Oryza sativa mRNA for starch branching enzyme rbe4, complete cds.                      | 1.15 | up   | 1.09   | down | 2.39  | up   | 1.66 | down | 1.23 | down | 1.39 | down | ABA |
| Os.41790.1.S1_x_at | LOC_Os01g47490 | Lg106, putative, expressed                                                             | 1.01 | up   | 1.18   | down | 4.32  | up   | 1.06 | down | 1.55 | up   | 1.01 | down | ABA |
| Os.41841.1.S1_at   | LOC_Os01g52130 | sulfate transporter, putative, expressed                                               | 1.01 | up   | 1.32   | down | 8.92  | up   | 1.47 | up   | 1.44 | up   | 2.80 | up   | 2   |
| Os.4186.1.S1_a_at  | LOC_Os01g55340 | dof zinc finger domain containing protein, putative, expressed                         | 1.03 | up   | 1.17   | up   | 3.63  | up   | 1.28 | up   | 1.03 | up   | 1.15 | down | ABA |
| Os.41891.1.S1_at   | CT836526       | Oryza sativa (indica cultivar-group) cDNA clone:OSIGCEA048M01, full insert sequence    | 1.00 | up   | 1.06   | down | 2.93  | up   | 1.14 | up   | 1.16 | up   | 1.34 | up   | ABA |
| Os.4194.1.S1_at    | LOC_Os10g40430 | LTPL139 - Protease inhibitor/seed storage/LTP family protein precursor, expressed      | 1.18 | down | 1.59   | down | 3.39  | down | 1.23 | up   | 1.41 | down | 4.13 | down | 2   |
| Os.4198.1.S1_at    | LOC_Os06g06980 | caffeoyl-CoA O-methyltransferase, putative, expressed                                  | 1.39 | up   | 1.07   | down | 2.78  | down | 1.13 | down | 1.36 | down | 1.13 | up   | ABA |
| Os.4198.1.S1_x_at  | LOC_Os06g06980 | caffeoyl-CoA O-methyltransferase, putative, expressed                                  | 1.36 | up   | 1.13   | down | 2.71  | down | 1.13 | down | 1.40 | down | 1.12 | up   | ABA |
| Os.42024.1.S1_at   | LOC_Os01g56420 | ctr copper transporter family protein, putative, expressed                             | 1.11 | down | 1.08   | down | 5.11  | down | 1.21 | up   | 1.23 | down | 1.71 | down | ABA |
| Os.42067.1.S1_at   | LOC_Os01g55560 | ABIL3, putative, expressed                                                             | 1.00 | up   | 1.53   | down | 2.13  | up   | 1.42 | down | 2.04 | down | 1.42 | down | 2   |
| Os.4208.1.S1_at    | LOC_Os06g07070 | BRASSINOSTEROID INSENSITIVE 1-associated receptor kinase 1 precursor, putative         | 1.50 | up   | 1.03   | up   | 2.84  | up   | 1.03 | down | 2.01 | up   | 1.23 | up   | 2   |
| Os.4222.1.S1_at    | LOC_Os06g07210 | ribonucleoside-diphosphate reductase large subunit, putative, expressed                | 1.33 | down | 1.04   | down | 4.02  | down | 1.18 | down | 1.62 | down | 1.56 | down | ABA |
| Os.4223.1.S1_s_at  | LOC_Os06g07220 | LTPL128 - Protease inhibitor/seed storage/LTP family protein precursor, expressed      | 1.25 | down | 1.35   | down | 8.63  | up   | 1.06 | down | 1.30 | down | 1.55 | down | ABA |
| Os.42285.1.S1_x_at | LOC_Os01g58550 | methyladenine glycosylase, putative, expressed                                         | 2.12 | up   | 1.13   | down | 1.24  | down | 1.05 | up   | 1.04 | up   | 1.42 | down | IAA |
| Os.42305.1.S1_s_at | LOC_Os01g58194 | protein disulfide isomerase, putative, expressed                                       | 1.52 | up   | 1.72   | down | 30.36 | up   | 1.15 | up   | 1.84 | up   | 1.03 | up   | ABA |
| Os.42305.2.S1_x_at | LOC_Os01g58194 | protein disulfide isomerase, putative, expressed                                       | 1.62 | up   | 1.42   | down | 37.97 | up   | 1.07 | down | 1.29 | up   | 1.20 | down | ABA |
| Os.4264.1.S1_at    | LOC_Os02g10070 | citrate synthase, putative, expressed                                                  | 1.01 | up   | 1.08   | up   | 2.41  | up   | 1.09 | up   | 2.02 | up   | 1.68 | up   | 2   |
| Os.42681.1.S1_at   | LOC_Os01g65560 | snRK1-interacting protein 1, putative, expressed                                       | 1.13 | down | 1.02   | down | 2.32  | down | 1.10 | up   | 1.45 | down | 1.48 | down | ABA |
| Os.42759.1.S1_at   | LOC_Os01g68830 | expressed protein                                                                      | 1.27 | down | 1.02   | up   | 2.44  | down | 1.10 | down | 1.17 | down | 1.08 | up   | ABA |
| Os.42796.1.S1_at   | NM_189846      | ---                                                                                    | 1.18 | up   | 1.31   | up   | 2.52  | down | 1.18 | up   | 1.25 | down | 1.15 | down | ABA |
| Os.42801.1.S1_at   | LOC_Os07g42626 | STRUBBELIG-RECEPTOR FAMILY 6 precursor, putative, expressed                            | 2.00 | up   | 1.58   | up   | 4.42  | up   | 1.27 | down | 1.18 | up   | 2.12 | down | 3   |
| Os.4281.1.S1_x_at  | LOC_Os06g03830 | retinol dehydrogenase, putative, expressed                                             | 1.59 | down | 3.62   | up   | 3.97  | down | 1.14 | up   | 1.35 | down | 1.46 | down | 2   |
| Os.42812.1.A1_at   | LOC_Os07g42520 | dirigent, putative, expressed                                                          | 1.12 | down | 1.09   | up   | 2.71  | down | 1.05 | down | 1.26 | down | 1.21 | down | ABA |
| Os.4324.1.S1_at    | LOC_Os03g03670 | expressed protein                                                                      | 1.20 | up   | 1.13   | up   | 6.00  | down | 1.30 | down | 1.72 | down | 1.22 | down | ABA |
| Os.43375.1.S1_at   | AK241759       | glutathione transferase (EC 2.5.1.18) 27K chain - maize                                | 1.08 | down | 1.06   | down | 12.04 | up   | 1.05 | down | 1.93 | up   | 1.14 | up   | ABA |
| Os.4338.1.S1_at    | LOC_Os03g03820 | adenylate kinase, putative, expressed                                                  | 1.11 | up   | 1.07   | down | 2.36  | down | 1.13 | up   | 1.07 | up   | 1.08 | up   | ABA |
| Os.43491.1.S1_x_at | LOC_Os01g11620 | GDSL-like lipase/acylhydrolase, putative, expressed                                    | 1.33 | up   | 1.15   | down | 2.96  | up   | 1.02 | up   | 1.33 | up   | 1.37 | up   | ABA |
| Os.43596.1.S1_at   | LOC_Os01g10110 | cytokinin dehydrogenase precursor, putative, expressed                                 | 1.01 | down | 727.12 | up   | 4.17  | up   | 1.00 | up   | 1.00 | down | 1.06 | up   | 2   |
| Os.4370.2.S1_x_at  | LOC_Os06g06780 | harpin-induced protein, putative, expressed                                            | 1.16 | up   | 1.01   | down | 2.34  | down | 1.57 | down | 1.45 | down | 1.11 | up   | ABA |
| Os.4379.1.S1_at    | LOC_Os08g36790 | bZIP transcription factor, putative, expressed                                         | 1.07 | down | 1.04   | down | 3.73  | up   | 1.09 | down | 1.19 | up   | 1.05 | up   | ABA |
| Os.43896.1.S1_at   | LOC_Os03g08900 | MATE efflux family protein, putative, expressed                                        | 2.28 | up   | 1.34   | down | 2.16  | up   | 1.07 | down | 7.35 | up   | 2.79 | up   | 4   |
| Os.4404.1.S1_at    | LOC_Os06g01966 | auxin-induced protein 5NG4, putative, expressed                                        | 1.35 | up   | 1.12   | up   | 27.87 | down | 1.85 | down | 2.13 | down | 2.18 | down | 3   |
| Os.4404.1.S1_s_at  | LOC_Os06g01966 | auxin-induced protein 5NG4, putative, expressed                                        | 1.51 | up   | 1.10   | up   | 16.33 | down | 1.70 | down | 2.01 | down | 1.84 | down | 2   |
| Os.44475.1.S1_at   | LOC_Os07g37730 | NADH-ubiquinone oxidoreductase, mitochondrial precursor, putative, expressed           | 4.61 | up   | 1.80   | up   | 1.48  | up   | 2.25 | down | 9.40 | up   | 3.28 | up   | 4   |
| Os.44475.1.S1_x_at | LOC_Os07g37730 | NADH-ubiquinone oxidoreductase, mitochondrial precursor, putative, expressed           | 4.88 | up   | 1.53   | up   | 1.22  | up   | 2.21 | down | 8.06 | up   | 2.87 | up   | 4   |
| Os.4453.1.S1_at    | LOC_Os06g03520 | DUF581 domain containing protein, expressed                                            | 1.25 | down | 1.45   | down | 7.11  | down | 1.33 | up   | 1.16 | up   | 1.04 | up   | ABA |

|                    |                |                                                                                     |      |      |      |      |       |      |      |      |       |      |      |      |     |
|--------------------|----------------|-------------------------------------------------------------------------------------|------|------|------|------|-------|------|------|------|-------|------|------|------|-----|
| Os.4458.1.S1_at    | LOC_Os06g03580 | zinc RING finger protein, putative, expressed                                       | 1.12 | down | 1.04 | down | 4.32  | down | 1.07 | down | 1.56  | up   | 1.04 | down | ABA |
| Os.44613.1.S1_at   | LOC_Os07g46610 | cis-zeatin O-glucosyltransferase, putative, expressed                               | 1.03 | down | 1.46 | up   | 2.34  | up   | 1.37 | up   | 1.88  | up   | 2.95 | up   | 2   |
| Os.44735.1.S1_at   | LOC_Os06g07760 | sulfiredoxin-1, putative, expressed                                                 | 1.13 | up   | 1.05 | down | 3.02  | up   | 1.08 | up   | 1.42  | up   | 1.08 | up   | ABA |
| Os.44806.1.A1_x_at | LOC_Os06g03800 | pollen ankyrin, putative, expressed                                                 | 1.14 | up   | 1.14 | down | 7.95  | up   | 1.22 | down | 1.33  | down | 1.09 | up   | ABA |
| Os.44850.1.S1_at   | LOC_Os06g01990 | phosphoglycolate phosphatase, plasmid, putative, expressed                          | 1.25 | up   | 1.08 | up   | 2.43  | down | 1.11 | up   | 1.41  | down | 1.41 | up   | ABA |
| Os.44872.1.S1_at   | LOC_Os06g01660 | integral membrane protein DUF6 domain containing protein, expressed                 | 1.09 | down | 1.08 | up   | 4.64  | up   | 1.01 | up   | 1.02  | up   | 1.28 | down | ABA |
| Os.44872.2.S1_x_at | LOC_Os06g01660 | integral membrane protein DUF6 domain containing protein, expressed                 | 1.08 | up   | 1.15 | down | 5.41  | up   | 1.08 | down | 1.01  | down | 1.20 | down | ABA |
| Os.44937.1.S1_at   | LOC_Os03g60810 | lectin-like receptor kinase, putative, expressed                                    | 1.39 | down | 1.19 | down | 4.83  | down | 1.19 | down | 1.02  | up   | 1.97 | up   | ABA |
| Os.4506.3.S1_x_at  | LOC_Os06g02370 | expressed protein                                                                   | 1.20 | up   | 1.15 | down | 2.20  | down | 1.20 | down | 1.41  | down | 1.42 | down | ABA |
| Os.4509.1.S1_x_at  | LOC_Os06g02410 | expressed protein                                                                   | 1.18 | up   | 1.20 | up   | 5.66  | up   | 1.60 | down | 1.20  | down | 1.29 | down | ABA |
| Os.45250.1.S1_at   | LOC_Os03g25460 | OsRCI2-4 - Putative low temperature and salt responsive protein, expressed          | 1.17 | up   | 1.22 | up   | 3.35  | up   | 1.10 | down | 1.19  | down | 1.58 | down | ABA |
| Os.45427.1.A1_at   | LOC_Os01g04120 | ZOS1-03 - C2H2 zinc finger protein, expressed                                       | 1.18 | up   | 2.71 | up   | 1.15  | down | 1.19 | up   | 1.61  | down | 1.82 | down | BAP |
| Os.456.1.S1_a_at   | LOC_Os05g18604 | OsSCP28 - Putative Serine Carboxypeptidase homologue, expressed                     | 1.04 | down | 1.08 | up   | 1.10  | down | 1.02 | down | 1.14  | up   | 2.40 | up   | JA  |
| Os.456.3.S1_s_at   | LOC_Os05g18604 | OsSCP28 - Putative Serine Carboxypeptidase homologue, expressed                     | 1.05 | up   | 1.04 | up   | 1.01  | up   | 1.06 | down | 1.03  | up   | 2.03 | up   | JA  |
| Os.45878.1.S1_at   | NM_001049410   | Oryza sativa (japonica cultivar-group) Os01g0315700 (Os01g0315700) mRNA, partial    | 1.11 | down | 1.34 | down | 3.27  | up   | 1.04 | up   | 1.21  | up   | 1.21 | down | ABA |
| Os.459.1.S1_at     | LOC_Os03g46070 | thaumatin, putative, expressed                                                      | 1.90 | down | 1.53 | up   | 1.43  | down | 1.41 | down | 1.19  | down | 2.23 | up   | JA  |
| Os.45902.1.A1_at   | LOC_Os01g27270 | retrotransposon protein, putative, unclassified                                     | 1.12 | down | 1.32 | up   | 1.12  | down | 1.12 | up   | 1.06  | up   | 4.84 | up   | JA  |
| Os.45916.1.S1_x_at | LOC_Os01g14850 | MFS18 protein precursor, putative, expressed                                        | 1.00 | up   | 1.19 | down | 2.15  | down | 1.14 | down | 1.27  | down | 1.16 | down | ABA |
| Os.45920.1.S1_at   | LOC_Os03g01530 | tubulin/FtsZ domain containing protein, putative, expressed                         | 1.16 | down | 1.10 | down | 3.03  | down | 1.10 | down | 1.58  | down | 1.33 | down | ABA |
| Os.45923.1.S1_at   | LOC_Os01g37590 | peptide transporter PTR2, putative, expressed                                       | 1.47 | up   | 1.15 | up   | 79.44 | up   | 1.51 | down | 1.38  | up   | 1.57 | down | ABA |
| Os.45926.1.S1_s_at | LOC_Os01g09700 | aminotransferase, classes I and II, domain containing protein, expressed            | 4.45 | up   | 1.27 | up   | 2.51  | up   | 1.13 | up   | 1.01  | down | 1.29 | down | 2   |
| Os.45928.1.S1_at   | LOC_Os01g32460 | expressed protein                                                                   | 1.13 | up   | 1.24 | down | 7.35  | down | 1.05 | down | 1.33  | down | 1.16 | up   | ABA |
| Os.45929.1.S1_at   | LOC_Os05g34170 | tubulin/FtsZ domain containing protein, putative, expressed                         | 1.17 | up   | 1.17 | up   | 3.22  | down | 1.25 | down | 1.44  | down | 1.37 | down | ABA |
| Os.45957.1.S1_at   | LOC_Os11g11694 | retrotransposon protein, putative, unclassified, expressed                          | 2.12 | up   | 1.05 | up   | 3.47  | up   | 1.14 | up   | 1.68  | up   | 1.44 | up   | 2   |
| Os.45963.1.S1_at   | LOC_Os01g11670 | OsSCP2 - Putative Serine Carboxypeptidase homologue, expressed                      | 1.38 | down | 1.26 | down | 2.50  | down | 2.12 | up   | 1.16  | down | 1.82 | up   | 2   |
| Os.45975.1.S1_a_at | LOC_Os03g27250 | OsFBO14 - F-box and other domain containing protein, expressed                      | 1.05 | up   | 1.08 | down | 2.36  | up   | 1.15 | down | 1.12  | up   | 1.15 | down | ABA |
| Os.45991.1.S1_x_at | LOC_Os01g10440 | xylosyltransferase, putative, expressed                                             | 1.61 | up   | 1.13 | up   | 5.85  | up   | 1.56 | up   | 5.07  | up   | 1.84 | up   | 2   |
| Os.45998.1.S1_x_at | LOC_Os03g12620 | glycosyl hydrolases family 17, putative, expressed                                  | 1.38 | up   | 1.18 | down | 6.07  | down | 1.39 | down | 2.84  | down | 1.42 | down | 2   |
| Os.46006.1.S1_at   | LOC_Os07g47140 | CCT/B-box zinc finger protein, putative, expressed                                  | 1.05 | down | 1.03 | down | 4.28  | down | 1.08 | down | 1.16  | down | 1.02 | up   | ABA |
| Os.46021.1.S1_at   | LOC_Os01g46580 | actin-related protein 2/3 complex subunit 2, putative, expressed                    | 1.35 | up   | 1.91 | up   | 22.12 | up   | 1.45 | down | 1.23  | up   | 1.39 | down | ABA |
| Os.46041.1.S1_at   | LOC_Os01g18210 | peptidyl-prolyl cis-trans isomerase, putative, expressed                            | 1.06 | up   | 1.01 | down | 3.00  | down | 1.04 | down | 1.40  | down | 1.14 | up   | ABA |
| Os.46049.1.S1_at   | LOC_Os01g41870 | protein kinase, putative, expressed                                                 | 1.01 | down | 1.04 | up   | 3.19  | down | 1.07 | up   | 1.19  | down | 1.02 | up   | ABA |
| Os.4605.1.S1_at    | LOC_Os10g41230 | homeobox associated leucine zipper, putative, expressed                             | 2.73 | up   | 1.43 | up   | 4.27  | up   | 1.08 | up   | 1.11  | down | 1.31 | down | 2   |
| Os.46073.1.A1_at   | LOC_Os04g33150 | desiccation-related protein PCC13-62 precursor, putative, expressed                 | 4.13 | down | 1.15 | up   | 3.25  | up   | 1.05 | down | 3.41  | down | 8.74 | up   | 4   |
| Os.46074.1.A1_at   | LOC_Os10g05210 | OsFBX368 - F-box domain containing protein, expressed                               | 1.19 | up   | 1.02 | up   | 2.14  | up   | 1.00 | down | 1.15  | up   | 1.10 | down | ABA |
| Os.4608.3.A1_a_at  | LOC_Os06g43860 | homeobox protein knotted-1, putative, expressed                                     | 1.09 | up   | 1.08 | up   | 2.15  | down | 1.11 | down | 1.18  | down | 1.20 | down | ABA |
| Os.46093.1.S1_at   | LOC_Os10g33900 | possible lysine decarboxylase domain containing protein, expressed                  | 1.65 | up   | 1.22 | down | 2.83  | down | 1.05 | up   | 1.01  | down | 1.78 | down | ABA |
| Os.46160.2.S1_at   | LOC_Os10g30790 | inorganic phosphate transporter, putative, expressed                                | 1.61 | down | 1.07 | up   | 1.01  | up   | 1.33 | up   | 2.95  | up   | 1.13 | up   | SA  |
| Os.46160.2.S1_x_at | LOC_Os10g30790 | inorganic phosphate transporter, putative, expressed                                | 1.22 | down | 1.10 | up   | 1.25  | down | 1.23 | up   | 2.46  | up   | 1.01 | up   | SA  |
| Os.4618.1.S1_at    | LOC_Os01g32670 | expressed protein                                                                   | 2.18 | up   | 1.77 | up   | 1.39  | down | 2.10 | up   | 12.17 | up   | 1.61 | down | 3   |
| Os.46187.1.S1_at   | LOC_Os07g40940 | X8 domain containing protein, expressed                                             | 1.09 | down | 1.09 | down | 2.05  | down | 1.25 | down | 1.30  | down | 1.07 | down | ABA |
| Os.4619.1.S1_at    | CT836472       | Oryza sativa (indica cultivar-group) cDNA clone:OSIGCSN061P16, full insert sequence | 1.18 | up   | 1.07 | down | 2.64  | down | 1.29 | down | 1.50  | down | 1.25 | up   | ABA |
| Os.46219.1.S1_at   | LOC_Os02g16709 | peptidase, putative, expressed                                                      | 1.01 | up   | 1.15 | up   | 3.57  | down | 1.14 | down | 1.54  | down | 1.27 | down | ABA |
| Os.46223.1.S1_s_at | LOC_Os09g33690 | Os9bglu32 - beta-glucosidase homologue, similar to G. max hydroxyisourate hydrolase | 1.18 | up   | 1.03 | down | 2.86  | up   | 1.01 | down | 1.07  | up   | 1.05 | up   | ABA |
| Os.4633.1.S1_at    | LOC_Os01g59970 | expressed protein                                                                   | 1.14 | up   | 1.10 | down | 2.15  | up   | 1.11 | down | 1.18  | down | 1.89 | down | ABA |
| Os.4634.1.S1_at    | LOC_Os09g10274 | expressed protein                                                                   | 1.26 | down | 1.34 | down | 3.72  | down | 1.11 | up   | 1.37  | down | 1.09 | up   | ABA |
| Os.4644.1.S1_at    | LOC_Os01g60770 | expansin precursor, putative, expressed                                             | 1.32 | up   | 2.70 | up   | 16.47 | down | 1.33 | up   | 2.54  | down | 1.08 | down | 3   |
| Os.46443.1.S1_at   | LOC_Os10g42430 | transcription factor MYC7E, putative, expressed                                     | 1.15 | down | 1.14 | up   | 1.48  | down | 1.22 | up   | 1.12  | down | 3.49 | up   | JA  |
| Os.46453.1.S1_a_at | LOC_Os10g13550 | endonuclease/exonuclease/phosphatase family domain containing protein, expressed    | 2.43 | up   | 1.09 | down | 2.05  | down | 1.16 | down | 1.18  | down | 1.13 | down | 2   |
| Os.46460.1.S1_at   | LOC_Os10g04610 | OsFBX360 - F-box domain containing protein, expressed                               | 1.00 | down | 1.12 | down | 3.08  | up   | 1.06 | up   | 1.22  | up   | 1.03 | down | ABA |
| Os.46472.1.S1_at   | LOC_Os10g07290 | glycosyl hydrolases family 17, putative, expressed                                  | 1.18 | down | 1.02 | down | 2.57  | down | 1.03 | down | 1.27  | down | 1.32 | down | ABA |
| Os.46477.1.S1_at   | LOC_Os10g28060 | 3-ketoacyl-CoA synthase, putative, expressed                                        | 1.17 | down | 1.07 | down | 2.40  | down | 1.04 | up   | 1.08  | down | 1.03 | up   | ABA |
| Os.46492.1.S1_at   | LOC_Os10g04370 | OsFBX357 - F-box domain containing protein, expressed                               | 1.02 | down | 1.00 | down | 2.45  | up   | 1.01 | up   | 1.03  | up   | 1.02 | up   | ABA |
| Os.46498.1.S1_at   | LOC_Os10g11310 | expressed protein                                                                   | 1.10 | down | 1.19 | up   | 3.00  | up   | 1.05 | down | 1.20  | down | 1.14 | down | ABA |
| Os.46498.2.S1_x_at | LOC_Os10g11310 | expressed protein                                                                   | 1.04 | down | 1.02 | up   | 2.70  | up   | 1.06 | down | 1.38  | down | 1.03 | up   | ABA |

|                    |                |                                                                                      |      |      |      |      |        |      |      |      |       |      |       |      |     |
|--------------------|----------------|--------------------------------------------------------------------------------------|------|------|------|------|--------|------|------|------|-------|------|-------|------|-----|
| Os.46507.1.S1_at   | LOC_Os10g39980 | expressed protein                                                                    | 1.14 | down | 1.27 | down | 8.03   | down | 1.07 | up   | 3.14  | down | 4.04  | down | 3   |
| Os.46525.1.S1_at   | LOC_Os10g12354 | endonuclease, putative, expressed                                                    | 1.14 | up   | 1.33 | up   | 2.28   | down | 1.20 | down | 1.47  | down | 1.50  | down | ABA |
| Os.46540.1.S1_at   | LOC_Os10g41060 | expressed protein                                                                    | 8.87 | up   | 1.43 | down | 1.17   | up   | 1.27 | down | 1.61  | up   | 1.20  | down | IAA |
| Os.46576.1.S1_at   | LOC_Os10g36100 | LTP157 - Protease inhibitor/seed storage/LTP family protein precursor, expressed     | 1.10 | down | 2.28 | up   | 1.04   | up   | 1.03 | down | 1.04  | up   | 1.82  | up   | BAP |
| Os.46576.1.S1_x_at | LOC_Os10g36100 | LTP157 - Protease inhibitor/seed storage/LTP family protein precursor, expressed     | 1.25 | up   | 2.19 | up   | 1.33   | up   | 1.26 | up   | 1.51  | up   | 1.98  | up   | BAP |
| Os.46580.1.S1_at   | LOC_Os10g19200 | vegetative cell wall protein gp1 precursor, putative, expressed                      | 1.10 | down | 1.09 | up   | 3.41   | down | 1.33 | up   | 1.35  | down | 1.27  | down | ABA |
| Os.46582.1.S1_at   | LOC_Os10g36180 | expressed protein                                                                    | 1.38 | up   | 1.39 | up   | 335.68 | up   | 1.05 | down | 2.45  | up   | 1.08  | up   | 2   |
| Os.46582.2.S1_x_at | LOC_Os10g36180 | expressed protein                                                                    | 1.01 | up   | 1.01 | up   | 32.58  | up   | 1.14 | up   | 1.04  | down | 1.13  | up   | ABA |
| Os.46589.1.S1_at   | LOC_Os10g17790 | remorin C-terminal domain containing protein, putative, expressed                    | 1.02 | up   | 1.19 | down | 2.02   | up   | 1.06 | down | 1.08  | up   | 1.12  | down | ABA |
| Os.4660.1.S1_s_at  | LOC_Os03g10860 | expressed protein                                                                    | 1.20 | up   | 1.20 | up   | 2.81   | down | 1.16 | up   | 1.34  | down | 1.57  | up   | ABA |
| Os.46600.1.S1_at   | LOC_Os10g23050 | helix-loop-helix DNA-binding protein, putative, expressed                            | 1.06 | down | 1.35 | up   | 1.30   | up   | 3.91 | up   | 4.20  | up   | 1.83  | up   | 2   |
| Os.46610.1.S1_x_at | LOC_Os12g43165 | retrotransposon protein, putative, Ty3-gypsy subclass, expressed                     | 2.05 | down | 1.18 | down | 1.11   | up   | 1.34 | up   | 1.16  | up   | 1.05  | up   | IAA |
| Os.46613.1.S1_s_at | LOC_Os10g42900 | peptide transporter PTR2, putative, expressed                                        | 1.13 | down | 1.42 | down | 4.49   | down | 1.39 | down | 1.69  | down | 1.26  | up   | ABA |
| Os.46617.1.S1_at   | LOC_Os10g41560 | expressed protein                                                                    | 1.16 | down | 1.11 | down | 5.48   | up   | 1.01 | down | 1.20  | up   | 1.20  | down | ABA |
| Os.46618.1.S1_at   | LOC_Os10g41550 | beta-amylase, putative, expressed                                                    | 1.74 | up   | 1.28 | up   | 15.29  | up   | 1.42 | up   | 2.17  | up   | 3.67  | up   | 3   |
| Os.46629.1.S1_s_at | LOC_Os10g40480 | LTP143 - Protease inhibitor/seed storage/LTP family protein precursor, expressed     | 1.04 | down | 1.73 | up   | 1.37   | down | 1.05 | down | 1.97  | down | 3.12  | down | JA  |
| Os.46631.1.S1_x_at | LOC_Os10g39840 | glycosyl hydrolases family 16, putative, expressed                                   | 1.25 | down | 1.64 | up   | 4.15   | down | 1.28 | up   | 1.17  | down | 1.10  | up   | ABA |
| Os.46633.1.A1_at   | LOC_Os10g38940 | fatty acid hydroxylase, putative, expressed                                          | 2.52 | up   | 1.67 | up   | 3.29   | down | 1.82 | up   | 3.15  | down | 2.01  | down | 4   |
| Os.46634.1.S1_x_at | AK241921       | glutathione S-transferase, putative                                                  | 2.66 | up   | 1.92 | up   | 2.69   | up   | 1.67 | up   | 4.88  | up   | 2.19  | up   | 4   |
| Os.46635.1.S1_x_at | LOC_Os10g38350 | glutathione S-transferase, putative, expressed                                       | 2.64 | up   | 1.10 | up   | 4.92   | up   | 1.11 | down | 7.72  | up   | 1.58  | up   | 3   |
| Os.46638.1.S1_at   | LOC_Os10g37770 | dehydration response related protein, putative, expressed                            | 1.11 | down | 1.16 | down | 2.70   | down | 1.13 | up   | 1.31  | down | 1.07  | down | ABA |
| Os.46645.1.S1_at   | LOC_Os10g36924 | aquaporin protein, putative, expressed                                               | 1.23 | down | 1.75 | down | 2.57   | down | 1.07 | down | 1.07  | up   | 1.09  | down | ABA |
| Os.46687.1.S1_at   | LOC_Os10g25550 | tyrosine protein kinase domain containing protein, putative, expressed               | 1.25 | down | 1.23 | down | 3.53   | down | 1.33 | up   | 1.10  | down | 1.19  | down | ABA |
| Os.46687.1.S1_x_at | LOC_Os10g25550 | tyrosine protein kinase domain containing protein, putative, expressed               | 1.11 | down | 1.26 | down | 3.63   | down | 1.31 | up   | 1.06  | down | 1.12  | down | ABA |
| Os.46689.1.S1_at   | LOC_Os10g25210 | OsFBX384 - F-box domain containing protein, expressed                                | 1.88 | up   | 1.10 | down | 2.85   | up   | 1.14 | up   | 3.77  | up   | 1.59  | up   | 2   |
| Os.46695.1.S1_at   | LOC_Os10g21790 | dehydration stress-induced protein, putative, expressed                              | 1.23 | up   | 1.42 | up   | 15.61  | up   | 1.60 | up   | 1.29  | up   | 1.48  | up   | ABA |
| Os.467.1.S1_a_at   | LOC_Os01g42380 | pleiotropic drug resistance protein, putative, expressed                             | 1.17 | up   | 2.17 | up   | 3.81   | up   | 1.56 | up   | 6.24  | up   | 8.51  | up   | 4   |
| Os.4671.1.S1_a_at  | LOC_Os01g24710 | jacalin-like lectin domain containing protein, expressed                             | 1.11 | down | 1.07 | up   | 3.42   | up   | 1.39 | up   | 1.58  | up   | 1.70  | up   | ABA |
| Os.4671.2.S1_a_at  | LOC_Os04g42470 | regulatory subunit, putative, expressed                                              | 1.07 | up   | 1.06 | down | 2.63   | up   | 1.12 | down | 1.23  | up   | 1.38  | down | ABA |
| Os.46718.1.S1_at   | LOC_Os10g08319 | cytochrome P450, putative, expressed                                                 | 1.76 | down | 1.17 | down | 4.46   | down | 1.34 | down | 1.47  | down | 3.72  | up   | 2   |
| Os.46725.1.S1_at   | LOC_Os10g05130 | expressed protein                                                                    | 1.39 | down | 1.23 | up   | 9.93   | down | 1.11 | down | 2.52  | down | 1.01  | up   | 2   |
| Os.46740.1.A1_at   | LOC_Os10g01640 | decarboxylase, putative                                                              | 3.55 | down | 5.51 | down | 3.61   | down | 1.21 | up   | 3.72  | down | 2.74  | down | 5   |
| Os.46741.1.S1_at   | LOC_Os10g01570 | C-5 cytosine-specific DNA methylase, putative, expressed                             | 1.19 | down | 1.23 | down | 4.08   | down | 1.14 | down | 2.19  | down | 1.75  | down | 2   |
| Os.46741.2.S1_x_at | LOC_Os10g01570 | C-5 cytosine-specific DNA methylase, putative, expressed                             | 1.15 | down | 1.13 | down | 3.96   | down | 1.29 | down | 2.58  | down | 1.48  | down | 2   |
| Os.46749.1.S1_x_at | LOC_Os09g27990 | annexin, putative, expressed                                                         | 1.23 | up   | 4.00 | up   | 3.61   | down | 1.49 | down | 1.44  | up   | 2.88  | down | 3   |
| Os.46758.1.S1_at   | AK120868       | phospholipase D zeta1                                                                | 1.20 | down | 1.09 | down | 5.02   | up   | 1.10 | down | 1.03  | up   | 1.68  | down | ABA |
| Os.46758.1.S1_s_at | AK120868       | phospholipase D zeta1                                                                | 1.14 | down | 1.15 | down | 4.32   | up   | 1.03 | down | 1.26  | up   | 1.12  | down | ABA |
| Os.46767.1.S1_at   | AK119988       | Oryza sativa Japonica Group cDNA clone:002-184-G03, full insert sequence.            | 1.02 | up   | 1.10 | down | 4.43   | up   | 1.03 | down | 1.03  | up   | 1.00  | up   | ABA |
| Os.46783.1.S1_a_at | LOC_Os10g26280 | ORC3 - Putative origin recognition complex subunit 3, expressed                      | 1.57 | down | 1.36 | down | 4.60   | down | 1.08 | up   | 2.98  | down | 1.82  | down | 2   |
| Os.4679.1.S1_at    | AK108349       | Oryza sativa Japonica Group cDNA clone:002-142-B10, full insert sequence.            | 1.45 | up   | 1.32 | up   | 3.85   | down | 1.45 | up   | 1.08  | down | 1.00  | down | ABA |
| Os.46791.1.S1_at   | LOC_Os10g09240 | expressed protein                                                                    | 1.01 | down | 1.02 | up   | 42.34  | up   | 1.01 | up   | 1.04  | down | 1.02  | up   | ABA |
| Os.46793.1.S1_at   | LOC_Os10g05660 | thaumatin, putative, expressed                                                       | 1.66 | up   | 2.15 | up   | 3.52   | down | 1.46 | up   | 1.12  | up   | 2.72  | up   | 3   |
| Os.4681.1.S1_at    | LOC_Os08g40690 | glycosyl hydrolase, putative, expressed                                              | 1.35 | down | 1.46 | up   | 6.85   | up   | 2.98 | up   | 2.75  | up   | 1.04  | up   | 3   |
| Os.46810.1.S1_at   | LOC_Os03g19452 | SMP-30/Gluconolactonase/LRE domain protein, putative, expressed                      | 1.25 | down | 1.14 | up   | 2.71   | down | 1.11 | down | 1.38  | down | 1.38  | down | ABA |
| Os.46823.1.S1_at   | LOC_Os10g41480 | phospho-2-dehydro-3-deoxyheptonate aldolase, chloroplast precursor, putative, expres | 1.06 | up   | 1.00 | up   | 38.69  | up   | 1.12 | up   | 2.37  | up   | 1.21  | up   | 2   |
| Os.46823.2.S1_x_at | LOC_Os10g41480 | phospho-2-dehydro-3-deoxyheptonate aldolase, chloroplast precursor, putative, expres | 1.09 | down | 1.09 | down | 8.88   | up   | 1.01 | up   | 1.03  | down | 1.03  | up   | ABA |
| Os.4683.1.S1_at    | AK100678       | pyruvate decarboxylase, putative                                                     | 1.47 | down | 1.22 | up   | 10.47  | up   | 2.65 | up   | 9.54  | up   | 4.76  | up   | 4   |
| Os.46836.1.S1_at   | LOC_Os10g38820 | bZIP family transcription factor, putative, expressed                                | 1.78 | up   | 1.44 | up   | 2.37   | up   | 1.12 | down | 1.05  | up   | 1.09  | down | ABA |
| Os.46842.1.S1_at   | AK108440       | Oryza sativa (japonica cultivar-group) Os10g0466800 (Os10g0466800) mRNA, comple      | 1.42 | up   | 2.59 | up   | 1.13   | up   | 1.58 | down | 2.55  | down | 2.32  | down | 3   |
| Os.46844.1.S1_at   | LOC_Os10g25400 | GDSL-like lipase/acylhydrolase, putative, expressed                                  | 1.24 | down | 1.13 | down | 1.12   | down | 1.17 | up   | 3.13  | up   | 15.13 | up   | 2   |
| Os.46846.1.S1_at   | LOC_Os10g37540 | OsFBDUF48 - F-box and DUF domain containing protein, expressed                       | 1.02 | up   | 1.04 | down | 1.07   | up   | 1.11 | up   | 32.04 | up   | 1.10  | up   | SA  |
| Os.46849.1.S1_at   | LOC_Os10g25230 | ZIM domain containing protein, putative, expressed                                   | 1.44 | down | 2.16 | up   | 1.81   | down | 1.33 | up   | 1.10  | up   | 14.09 | up   | 2   |
| Os.46852.1.S1_at   | LOC_Os10g41430 | cyclin, putative, expressed                                                          | 1.22 | down | 1.12 | down | 3.07   | down | 1.24 | down | 1.27  | down | 1.33  | down | ABA |
| Os.46858.1.S1_at   | LOC_Os10g38860 | hydrolase, alpha/beta fold family domain containing protein, expressed               | 1.08 | up   | 1.13 | up   | 3.83   | up   | 1.39 | down | 1.06  | down | 1.34  | down | ABA |
| Os.46872.1.S1_at   | LOC_Os10g37160 | transposon protein, putative, unclassified, expressed                                | 1.05 | down | 1.03 | down | 1.19   | down | 1.56 | down | 4.08  | up   | 3.92  | up   | 2   |

|                    |                |                                                                                     |       |      |      |      |        |      |      |      |        |      |       |      |     |
|--------------------|----------------|-------------------------------------------------------------------------------------|-------|------|------|------|--------|------|------|------|--------|------|-------|------|-----|
| Os.46881.1.S1_at   | LOC_Os10g39770 | zinc finger, C3HC4 type, domain containing protein, expressed                       | 1.73  | down | 1.06 | up   | 2.17   | down | 1.51 | up   | 1.41   | down | 1.42  | down | ABA |
| Os.46890.1.S1_s_at | LOC_Os10g37640 | HIT zinc finger domain containing protein, expressed                                | 1.13  | down | 1.08 | up   | 2.32   | up   | 1.15 | down | 1.18   | up   | 1.45  | down | ABA |
| Os.46890.1.S1_x_at | LOC_Os10g37640 | HIT zinc finger domain containing protein, expressed                                | 1.14  | down | 1.16 | up   | 2.39   | up   | 1.01 | down | 1.31   | up   | 1.15  | down | ABA |
| Os.46890.2.S1_at   | LOC_Os10g37640 | HIT zinc finger domain containing protein, expressed                                | 1.05  | up   | 1.11 | up   | 2.20   | up   | 1.13 | down | 1.00   | up   | 1.07  | down | ABA |
| Os.46895.1.S1_at   | LOC_Os10g34230 | cytokinin dehydrogenase precursor, putative, expressed                              | 1.23  | down | 1.23 | down | 2.60   | down | 1.23 | down | 1.37   | down | 1.23  | down | 2   |
| Os.46896.1.S1_at   | LOC_Os10g39870 | ATG1, putative, expressed                                                           | 1.23  | up   | 1.06 | up   | 1.10   | up   | 1.45 | up   | 2.82   | up   | 1.44  | up   | SA  |
| Os.46924.1.S1_at   | LOC_Os07g40690 | NAD dependent epimerase/dehydratase family protein, putative, expressed             | 1.28  | up   | 1.27 | up   | 15.78  | down | 1.15 | down | 1.63   | down | 1.57  | down | ABA |
| Os.4693.1.S1_at    | LOC_Os04g52830 | OsFBK15 - F-box domain and kelch repeat containing protein, expressed               | 1.16  | down | 1.14 | down | 2.05   | down | 1.05 | down | 1.22   | down | 1.16  | up   | ABA |
| Os.46941.1.S1_s_at | LOC_Os06g48500 | expressed protein                                                                   | 1.07  | down | 1.34 | up   | 4.03   | up   | 1.10 | up   | 1.38   | up   | 1.59  | down | ABA |
| Os.4695.1.S1_s_at  | LOC_Os03g28940 | ZIM domain containing protein, putative, expressed                                  | 1.64  | up   | 1.01 | down | 1.92   | down | 1.01 | up   | 1.15   | down | 3.06  | up   | JA  |
| Os.4700.1.S1_at    | LOC_Os07g47100 | transporter, monovalent cation:proton antiporter-2 family, putative, expressed      | 2.91  | up   | 1.03 | down | 8.17   | up   | 1.88 | down | 1.23   | up   | 1.23  | down | 2   |
| Os.47000.1.S1_x_at | LOC_Os10g42220 | enoyl-CoA hydratase/isomerase family protein, putative                              | 1.10  | up   | 1.10 | up   | 2.39   | up   | 1.03 | up   | 1.65   | up   | 1.41  | up   | ABA |
| Os.47251.1.S1_at   | LOC_Os06g11600 | growth regulator related protein, putative, expressed                               | 1.02  | up   | 1.06 | down | 2.44   | up   | 1.10 | down | 1.02   | down | 1.05  | down | ABA |
| Os.47290.1.S1_at   | LOC_Os04g34240 | histone H3, putative, expressed                                                     | 1.29  | down | 1.04 | down | 6.78   | down | 1.55 | down | 3.15   | down | 2.96  | down | 3   |
| Os.4730.1.S1_at    | CT837944       | Oryza sativa (indica cultivar-group) cDNA clone:OSIGCSN025B22, full insert sequence | 1.11  | up   | 1.08 | down | 2.41   | up   | 1.01 | up   | 1.01   | up   | 1.12  | up   | ABA |
| Os.47303.1.S1_at   | LOC_Os01g54030 | NADP-dependent malic enzyme, putative, expressed                                    | 1.01  | up   | 1.04 | up   | 368.54 | up   | 1.14 | down | 1.25   | down | 1.08  | down | ABA |
| Os.47303.1.S1_s_at | LOC_Os01g54030 | NADP-dependent malic enzyme, putative, expressed                                    | 1.02  | down | 1.06 | up   | 386.31 | up   | 1.48 | down | 1.51   | down | 1.46  | down | ABA |
| Os.47313.1.A1_at   | LOC_Os01g64820 | POLA1 - Putative DNA polymerase alpha catalytic subunit, expressed                  | 1.33  | down | 1.01 | down | 5.37   | down | 1.03 | down | 2.09   | down | 1.65  | down | 2   |
| Os.47314.1.S2_at   | LOC_Os08g39100 | protein phosphatase 2C, putative, expressed                                         | 1.08  | down | 1.12 | up   | 2.10   | down | 1.17 | down | 1.44   | down | 1.10  | down | ABA |
| Os.47327.1.S1_at   | LOC_Os03g52380 | PIII5 - Proteinase inhibitor II family protein precursor, expressed                 | 1.32  | down | 1.33 | up   | 6.33   | up   | 1.05 | up   | 1.98   | up   | 1.69  | up   | ABA |
| Os.47327.1.S1_x_at | LOC_Os03g52380 | PIII5 - Proteinase inhibitor II family protein precursor, expressed                 | 1.14  | down | 1.32 | up   | 5.77   | up   | 1.10 | down | 2.14   | up   | 1.86  | up   | 2   |
| Os.47333.1.S1_at   | LOC_Os09g34000 | expressed protein                                                                   | 1.11  | up   | 1.17 | up   | 2.03   | down | 1.14 | down | 1.30   | down | 1.14  | down | ABA |
| Os.47344.1.A1_at   | LOC_Os11g07440 | plant neutral invertase domain containing protein, expressed                        | 1.52  | up   | 1.25 | up   | 2.27   | down | 1.02 | down | 2.12   | up   | 1.30  | up   | 2   |
| Os.47352.1.S1_s_at | LOC_Os05g29860 | mitochondrial carrier protein, putative, expressed                                  | 1.27  | up   | 1.13 | up   | 2.73   | down | 1.19 | down | 1.60   | down | 1.38  | down | ABA |
| Os.47373.1.S1_at   | LOC_Os03g11110 | zinc finger family protein, putative, expressed                                     | 1.16  | down | 1.13 | down | 2.22   | down | 1.11 | down | 1.38   | down | 1.36  | down | ABA |
| Os.4738.2.S1_x_at  | LOC_Os03g56800 | CBS domain containing membrane protein, putative, expressed                         | 1.04  | down | 1.06 | up   | 2.41   | down | 1.04 | up   | 1.42   | down | 1.00  | down | ABA |
| Os.47381.1.S1_x_at | LOC_Os04g36800 | 3-oxoacyl-synthase, putative, expressed                                             | 1.23  | up   | 1.07 | up   | 6.33   | down | 1.08 | down | 2.36   | down | 1.10  | down | 2   |
| Os.47381.2.S1_at   | LOC_Os04g36800 | 3-oxoacyl-synthase, putative, expressed                                             | 1.14  | up   | 1.24 | up   | 6.57   | down | 1.23 | down | 2.39   | down | 1.44  | down | 2   |
| Os.47401.1.A1_s_at | LOC_Os02g58550 | chloroplast channel forming outer membrane protein, putative, expressed             | 1.11  | up   | 1.03 | up   | 2.22   | down | 1.27 | down | 1.54   | down | 1.27  | down | ABA |
| Os.4741.2.S1_x_at  | LOC_Os10g41930 | haloacid dehalogenase-like hydrolase family protein, putative, expressed            | 4.04  | up   | 1.02 | up   | 4.46   | up   | 1.28 | up   | 5.02   | up   | 1.29  | up   | 3   |
| Os.47413.1.S1_at   | LOC_Os06g33100 | peroxidase precursor, putative, expressed                                           | 3.19  | down | 1.39 | up   | 14.37  | down | 3.61 | up   | 1.05   | up   | 1.32  | up   | 3   |
| Os.47413.1.S1_x_at | LOC_Os06g33100 | peroxidase precursor, putative, expressed                                           | 2.96  | down | 1.28 | up   | 10.22  | down | 3.39 | up   | 1.22   | down | 1.15  | up   | 3   |
| Os.47438.1.A1_at   | LOC_Os10g38470 | glutathione S-transferase, putative, expressed                                      | 1.15  | up   | 1.09 | down | 3.06   | up   | 1.16 | up   | 2.26   | up   | 1.44  | up   | 2   |
| Os.47472.1.S1_at   | LOC_Os09g39410 | male sterility protein, putative, expressed                                         | 1.06  | down | 1.03 | up   | 2.15   | down | 1.25 | up   | 1.07   | down | 1.31  | up   | ABA |
| Os.47474.1.S1_at   | LOC_Os06g44160 | heat shock protein DnaJ, putative, expressed                                        | 1.00  | down | 1.55 | up   | 2.73   | up   | 1.12 | up   | 1.04   | up   | 1.13  | down | ABA |
| Os.47490.1.S1_at   | LOC_Os08g39550 | polygalacturonase inhibitor 2 precursor, putative, expressed                        | 1.20  | up   | 1.11 | up   | 2.38   | down | 1.03 | up   | 1.02   | down | 1.53  | down | ABA |
| Os.4750.1.S1_x_at  | LOC_Os01g15970 | expressed protein                                                                   | 1.42  | down | 1.17 | down | 2.50   | down | 1.34 | down | 1.65   | down | 1.86  | down | ABA |
| Os.47560.1.S1_at   | LOC_Os12g06660 | actin, putative, expressed                                                          | 1.23  | down | 1.10 | up   | 6.24   | down | 1.09 | up   | 2.86   | down | 3.58  | down | 3   |
| Os.4759.1.S1_at    | LOC_Os09g20220 | glutathione S-transferase, putative, expressed                                      | 33.75 | up   | 1.38 | up   | 33.43  | up   | 2.18 | up   | 102.03 | up   | 9.17  | up   | 5   |
| Os.4760.1.S1_at    | LOC_Os04g39420 | 6-phosphofructokinase 2, putative, expressed                                        | 1.05  | down | 1.19 | down | 1.99   | down | 1.13 | up   | 1.79   | up   | 1.19  | up   | ABA |
| Os.47600.1.S1_s_at | LOC_Os02g54730 | transmembrane amino acid transporter protein, putative, expressed                   | 1.12  | up   | 1.41 | up   | 2.29   | down | 1.17 | up   | 1.24   | down | 1.63  | down | ABA |
| Os.47600.2.S1_x_at | LOC_Os02g54730 | transmembrane amino acid transporter protein, putative, expressed                   | 1.19  | up   | 1.39 | up   | 2.24   | down | 1.32 | up   | 1.20   | down | 1.33  | down | ABA |
| Os.47601.1.A1_at   | LOC_Os12g12720 | jasmonate-induced protein, putative, expressed                                      | 1.60  | down | 1.57 | down | 3.01   | down | 1.55 | down | 4.19   | down | 13.79 | up   | 3   |
| Os.4762.1.S1_at    | LOC_Os10g38740 | glutathione S-transferase, putative, expressed                                      | 4.45  | up   | 1.04 | up   | 2.45   | up   | 1.26 | up   | 4.78   | up   | 1.63  | up   | 3   |
| Os.47660.1.S1_s_at | LOC_Os05g03480 | acyl-coenzyme A dehydrogenase, mitochondrial precursor, putative, expressed         | 1.04  | up   | 1.04 | down | 2.39   | up   | 1.24 | up   | 1.70   | up   | 1.44  | up   | ABA |
| Os.4770.1.S1_a_at  | LOC_Os01g06560 | transcription factor HBP-1b, putative, expressed                                    | 1.02  | up   | 1.02 | down | 18.87  | up   | 1.46 | up   | 2.79   | up   | 1.00  | up   | 2   |
| Os.47717.1.A1_s_at | LOC_Os01g64670 | soluble inorganic pyrophosphatase, putative, expressed                              | 1.01  | down | 1.04 | up   | 20.32  | up   | 1.04 | up   | 1.03   | down | 1.01  | up   | ABA |
| Os.47726.1.S1_at   | LOC_Os12g34890 | acyl carrier protein, putative, expressed                                           | 1.16  | up   | 1.11 | up   | 3.76   | down | 1.24 | down | 1.90   | down | 1.25  | down | ABA |
| Os.4773.1.S1_at    | LOC_Os06g04240 | expressed protein                                                                   | 1.24  | up   | 1.09 | up   | 3.28   | up   | 1.32 | down | 2.10   | up   | 1.02  | up   | 2   |
| Os.47730.2.S1_x_at | AK072692       | nucleoside triphosphatase precursor, chromatin-associated                           | 1.02  | up   | 1.19 | down | 3.35   | down | 2.01 | down | 1.14   | up   | 1.99  | up   | 3   |
| Os.47732.1.S1_s_at | LOC_Os12g36640 | universal stress protein domain containing protein, putative, expressed             | 1.24  | up   | 1.01 | up   | 1.24   | up   | 1.24 | up   | 1.21   | up   | 1.21  | down | ABA |
| Os.47735.1.S1_at   | LOC_Os02g34970 | no apical meristem protein, putative, expressed                                     | 1.45  | up   | 3.31 | down | 20.19  | up   | 1.17 | up   | 2.76   | up   | 1.57  | up   | 3   |
| Os.47750.1.A1_at   | LOC_Os01g50900 | Cupin domain containing protein, expressed                                          | 1.06  | up   | 1.01 | up   | 2.52   | up   | 1.01 | up   | 1.00   | up   | 1.05  | up   | ABA |
| Os.47761.1.S1_at   | LOC_Os03g13300 | glutamate decarboxylase, putative, expressed                                        | 1.08  | up   | 1.23 | down | 3.95   | up   | 1.32 | up   | 4.07   | up   | 1.08  | up   | 2   |
| Os.47778.1.A1_s_at | LOC_Os04g33640 | glycosyl hydrolases family 17, putative, expressed                                  | 1.44  | up   | 1.26 | up   | 4.92   | up   | 1.02 | up   | 1.08   | up   | 1.41  | down | ABA |

|                    |                |                                                                                     |      |      |      |      |       |      |      |      |      |      |       |      |     |
|--------------------|----------------|-------------------------------------------------------------------------------------|------|------|------|------|-------|------|------|------|------|------|-------|------|-----|
| Os.4780.1.S1_at    | LOC_Os03g55290 | GASR3 - Gibberellin-regulated GASA/GAST/Snakin family protein precursor, expressed  | 1.53 | up   | 1.16 | down | 5.75  | up   | 1.34 | up   | 3.30 | up   | 1.08  | down | 2   |
| Os.47814.1.A1_s_at | LOC_Os09g38130 | auxin efflux carrier component, putative, expressed                                 | 2.85 | up   | 1.32 | down | 4.85  | up   | 1.88 | up   | 2.77 | up   | 2.41  | up   | 4   |
| Os.4782.1.S1_at    | AK111769       | Oryza sativa (indica cultivar-group) cDNA clone:OSIGCSN048K14, full insert sequence | 1.09 | down | 1.16 | down | 4.57  | up   | 1.12 | up   | 1.81 | up   | 1.16  | up   | ABA |
| Os.4784.1.S1_at    | LOC_Os09g31040 | EF hand family protein, putative, expressed                                         | 1.09 | down | 2.56 | up   | 4.39  | up   | 1.12 | up   | 3.03 | up   | 1.44  | up   | 3   |
| Os.47854.1.S1_at   | LOC_Os02g46780 | MYB family transcription factor, putative, expressed                                | 1.32 | down | 1.40 | down | 2.35  | down | 1.26 | up   | 1.16 | down | 4.13  | up   | 2   |
| Os.47871.1.S1_at   | LOC_Os06g51440 | transposon protein, putative, CACTA, En/Spm sub-class, expressed                    | 1.01 | down | 1.04 | up   | 34.70 | up   | 1.05 | up   | 1.07 | up   | 1.09  | up   | ABA |
| Os.47875.1.S1_s_at | LOC_Os05g34290 | glutathione gamma-glutamylcysteineyltransferase 1, putative, expressed              | 1.04 | down | 1.05 | up   | 1.10  | down | 1.05 | down | 2.50 | up   | 1.30  | up   | SA  |
| Os.47879.1.A1_at   | AK111367       | Oryza sativa Japonica Group cDNA clone:002-182-A01, full insert sequence.           | 1.27 | down | 1.30 | down | 3.80  | down | 1.64 | down | 1.61 | down | 1.40  | down | ABA |
| Os.47900.1.A1_at   | AK106506       | Oryza sativa Japonica Group cDNA clone:002-105-G01, full insert sequence.           | 1.03 | up   | 1.00 | down | 1.03  | up   | 1.03 | up   | 4.29 | up   | 1.27  | up   | SA  |
| Os.47914.1.S1_at   | LOC_Os06g11210 | 12-oxophytodienoate reductase, putative, expressed                                  | 5.55 | up   | 1.32 | up   | 1.56  | down | 1.29 | up   | 4.13 | up   | 2.13  | up   | 3   |
| Os.47938.1.S1_at   | LOC_Os04g43290 | ARPC2B, putative, expressed                                                         | 1.05 | down | 1.25 | up   | 4.32  | down | 2.99 | down | 2.72 | down | 1.37  | down | 3   |
| Os.47958.1.A1_x_at | LOC_Os01g61410 | NADH-ubiquinone oxidoreductase, mitochondrial precursor, putative, expressed        | 1.14 | up   | 1.04 | down | 3.25  | up   | 1.11 | down | 1.23 | up   | 1.23  | up   | ABA |
| Os.47961.2.S1_x_at | LOC_Os01g38990 | mitochondrial carrier protein, putative, expressed                                  | 1.17 | down | 1.25 | down | 3.19  | up   | 1.26 | up   | 1.50 | up   | 1.74  | up   | ABA |
| Os.47962.1.S1_at   | LOC_Os01g35160 | TKL_IRAK_DUF26-lh.4 - DUF26 kinases have homology to DUF26 containing loci, exp     | 1.23 | down | 1.01 | up   | 2.87  | up   | 1.11 | up   | 1.15 | up   | 1.04  | down | ABA |
| Os.47962.1.S1_x_at | LOC_Os01g35160 | TKL_IRAK_DUF26-lh.4 - DUF26 kinases have homology to DUF26 containing loci, exp     | 1.03 | down | 1.01 | up   | 2.65  | up   | 1.12 | down | 1.01 | down | 1.04  | down | ABA |
| Os.47971.1.A1_at   | LOC_Os05g49350 | DUF1645 domain containing protein, putative, expressed                              | 1.48 | up   | 1.01 | up   | 3.76  | up   | 1.49 | down | 1.02 | up   | 1.17  | down | ABA |
| Os.47976.1.S1_at   | AK289245       | Oryza sativa Japonica Group cDNA, clone: J100077H08, full insert sequence.          | 1.18 | up   | 1.15 | up   | 1.99  | down | 1.66 | down | 3.21 | down | 2.49  | down | 3   |
| Os.47989.1.S1_at   | LOC_Os04g57800 | BTBN13 - Bric-a-Brac, Tramtrack, Broad Complex BTB domain with non-phototropic hy   | 1.50 | up   | 1.15 | up   | 2.73  | up   | 1.46 | up   | 1.00 | down | 1.69  | down | ABA |
| Os.4799.1.S1_at    | LOC_Os06g23684 | tyrosine aminotransferase, putative, expressed                                      | 1.11 | down | 1.49 | down | 11.27 | up   | 1.11 | up   | 1.40 | up   | 1.42  | up   | ABA |
| Os.47996.1.A1_at   | LOC_Os01g36390 | MCM4 - Putative minichromosome maintenance MCM complex subunit 4, expressed         | 1.35 | down | 1.19 | down | 8.60  | down | 1.01 | down | 2.37 | down | 1.58  | down | 2   |
| Os.47997.1.A1_at   | LOC_Os01g43950 | expressed protein                                                                   | 1.33 | up   | 1.30 | down | 2.84  | up   | 1.00 | up   | 1.37 | down | 2.98  | down | 2   |
| Os.48003.1.A1_at   | LOC_Os01g47840 | S-locus-like receptor protein kinase, putative, expressed                           | 1.83 | down | 2.83 | down | 1.70  | down | 2.98 | up   | 2.24 | up   | 12.16 | up   | 4   |
| Os.48013.1.A1_at   | LOC_Os03g12230 | caleosin related protein, putative, expressed                                       | 1.12 | down | 1.22 | up   | 15.36 | up   | 1.20 | down | 1.01 | down | 1.03  | up   | ABA |
| Os.48017.1.S1_x_at | LOC_Os07g46420 | expressed protein                                                                   | 1.08 | down | 1.00 | down | 2.58  | up   | 1.09 | up   | 1.04 | up   | 1.11  | up   | ABA |
| Os.48018.1.S1_at   | LOC_Os06g03570 | pentatricopeptide, putative, expressed                                              | 1.09 | down | 1.04 | up   | 2.33  | down | 1.63 | up   | 1.39 | down | 1.32  | up   | ABA |
| Os.48038.1.S1_at   | LOC_Os02g55340 | WD domain and HEAT domain containing protein, putative, expressed                   | 1.07 | up   | 1.06 | down | 2.17  | up   | 1.03 | up   | 1.16 | up   | 1.19  | down | ABA |
| Os.4804.1.S1_at    | LOC_Os06g07030 | AP2 domain containing protein, expressed                                            | 1.26 | down | 1.54 | down | 4.17  | up   | 1.19 | up   | 1.40 | up   | 1.12  | up   | ABA |
| Os.4806.1.S1_at    | LOC_Os02g57250 | OslAA10 - Auxin-responsive Aux/IAA gene family member, expressed                    | 3.07 | up   | 1.12 | up   | 1.64  | down | 1.74 | down | 1.03 | down | 1.61  | down | IAA |
| Os.48061.1.A1_x_at | LOC_Os06g18670 | anthocyanidin 3-O-glucosyltransferase, putative, expressed                          | 1.17 | up   | 1.01 | up   | 1.09  | down | 2.05 | down | 1.05 | down | 1.25  | up   | ACC |
| Os.48064.1.S1_at   | LOC_Os09g26780 | zinc-finger protein, putative, expressed                                            | 1.01 | down | 1.48 | down | 2.52  | down | 1.31 | down | 1.48 | down | 4.17  | up   | 2   |
| Os.4807.1.S1_at    | LOC_Os04g54200 | diacylglycerol kinase, putative, expressed                                          | 1.17 | down | 1.09 | up   | 3.55  | down | 1.17 | up   | 1.61 | down | 1.16  | up   | ABA |
| Os.48072.1.S1_at   | LOC_Os02g55410 | MCM5 - Putative minichromosome maintenance MCM complex subunit 5, expressed         | 1.57 | down | 1.21 | down | 6.17  | down | 1.06 | down | 2.13 | down | 1.71  | down | 2   |
| Os.48077.1.A1_at   | LOC_Os12g26060 | bifunctional dihydrofolate reductase-thymidylate synthase, putative, expressed      | 1.27 | down | 1.12 | down | 6.43  | down | 1.37 | down | 2.54 | down | 2.60  | down | 3   |
| Os.48082.1.S1_at   | LOC_Os09g25070 | OsWRKY62 - Superfamily of TFs having WRKY and zinc finger domains, expressed        | 1.02 | down | 1.36 | down | 11.70 | down | 1.65 | up   | 4.03 | up   | 1.78  | up   | 2   |
| Os.48095.1.S1_s_at | LOC_Os06g13830 | endoglucanase, putative, expressed                                                  | 1.00 | down | 1.06 | up   | 2.11  | down | 1.08 | up   | 1.34 | down | 1.28  | up   | ABA |
| Os.4810.1.S1_s_at  | LOC_Os06g12740 | expressed protein                                                                   | 2.10 | down | 1.11 | up   | 2.35  | down | 1.41 | down | 1.10 | down | 1.66  | up   | 2   |
| Os.48101.1.S1_at   | LOC_Os04g54810 | beta-D-xylosidase, putative, expressed                                              | 1.01 | up   | 1.06 | down | 3.57  | down | 1.16 | down | 1.54 | down | 1.13  | down | ABA |
| Os.48105.1.A1_at   | LOC_Os06g15620 | GASR7 - Gibberellin-regulated GASA/GAST/Snakin family protein precursor, expressed  | 1.42 | up   | 1.14 | up   | 8.33  | down | 1.30 | up   | 1.06 | down | 1.46  | down | ABA |
| Os.48131.1.S1_s_at | LOC_Os04g58890 | expressed protein                                                                   | 2.37 | up   | 1.14 | up   | 3.67  | up   | 1.01 | down | 1.89 | up   | 1.99  | up   | 3   |
| Os.48215.1.A1_at   | LOC_Os05g43940 | O-methyltransferase, putative, expressed                                            | 1.06 | down | 1.45 | up   | 2.90  | down | 1.08 | down | 1.82 | down | 2.05  | up   | 2   |
| Os.48216.1.S1_at   | LOC_Os09g34250 | UDP-glucuronosyl and UDP-glucosyl transferase domain containing protein, expressed  | 1.17 | up   | 1.23 | down | 2.00  | up   | 1.05 | up   | 3.31 | up   | 1.92  | up   | 2   |
| Os.4822.1.S1_at    | LOC_Os05g08570 | OslAA15 - Auxin-responsive Aux/IAA gene family member, expressed                    | 2.77 | up   | 1.01 | down | 1.05  | down | 1.13 | down | 1.19 | up   | 1.06  | up   | IAA |
| Os.48260.1.S2_at   | LOC_Os02g52490 | expressed protein                                                                   | 1.11 | down | 1.07 | up   | 5.20  | up   | 1.36 | down | 1.41 | down | 1.79  | down | ABA |
| Os.48263.1.S1_at   | LOC_Os04g55120 | jp18, putative, expressed                                                           | 1.09 | up   | 1.03 | down | 4.87  | down | 1.12 | down | 1.22 | down | 1.26  | down | ABA |
| Os.48278.2.S1_x_at | LOC_Os03g48600 | domain of unknown function DUF966 domain containing protein, expressed              | 1.44 | up   | 1.30 | down | 2.14  | down | 1.38 | down | 1.26 | down | 1.37  | down | ABA |
| Os.48287.1.S1_at   | LOC_Os04g38570 | multidrug resistance protein, putative, expressed                                   | 1.07 | up   | 1.02 | down | 2.24  | down | 1.05 | up   | 1.09 | down | 1.63  | down | ABA |
| Os.48291.1.S1_at   | LOC_Os04g59580 | zinc finger, C3HC4 type domain containing protein, expressed                        | 1.06 | down | 1.13 | down | 2.23  | up   | 1.12 | down | 1.09 | up   | 1.29  | down | ABA |
| Os.48328.1.S1_at   | LOC_Os01g24560 | fruit bromelain precursor, putative, expressed                                      | 2.76 | down | 1.67 | up   | 35.57 | down | 1.02 | down | 6.79 | down | 5.68  | down | 4   |
| Os.48353.1.S1_at   | LOC_Os02g51130 | glycosyl transferase 8 domain containing protein, putative, expressed               | 1.32 | up   | 1.22 | down | 2.76  | down | 1.12 | down | 1.02 | down | 1.18  | down | ABA |
| Os.48388.1.S1_at   | LOC_Os12g34500 | expressed protein                                                                   | 1.02 | down | 1.03 | down | 3.86  | down | 1.10 | down | 1.59 | down | 1.24  | down | ABA |
| Os.48412.1.A1_at   | LOC_Os08g38890 | expressed protein                                                                   | 1.09 | down | 1.07 | down | 2.75  | up   | 1.05 | down | 1.02 | down | 1.28  | up   | ABA |
| Os.48418.1.S1_at   | LOC_Os11g24374 | OsSCP55 - Putative Serine Carboxypeptidase homologue, expressed                     | 1.15 | down | 1.30 | up   | 5.96  | down | 1.32 | down | 1.07 | up   | 2.49  | up   | 2   |
| Os.48429.1.S1_at   | LOC_Os03g63970 | gibberellin 20 oxidase 1, putative, expressed                                       | 3.68 | down | 1.66 | up   | 9.75  | down | 1.12 | up   | 1.89 | down | 1.42  | down | 2   |
| Os.48438.1.S1_at   | LOC_Os03g05806 | pseudouridine synthase family protein, putative, expressed                          | 1.06 | down | 1.08 | up   | 3.30  | down | 1.24 | down | 1.59 | down | 1.38  | down | ABA |
| Os.4844.1.S1_at    | LOC_Os05g06970 | peroxidase precursor, putative, expressed                                           | 1.58 | down | 1.24 | down | 4.33  | down | 1.58 | up   | 1.24 | down | 1.73  | down | ABA |

|                    |                |                                                                                       |       |      |      |      |         |      |      |      |       |      |      |      |     |
|--------------------|----------------|---------------------------------------------------------------------------------------|-------|------|------|------|---------|------|------|------|-------|------|------|------|-----|
| Os.48443.1.S1_at   | LOC_Os12g03130 | CDC45A - Putative DNA replication initiation protein, expressed                       | 1.52  | down | 1.05 | down | 3.87    | down | 1.32 | down | 2.11  | down | 1.51 | down | 2   |
| Os.48498.1.S1_at   | LOC_Os03g08110 | hydrolase protein, putative, expressed                                                | 1.23  | up   | 1.78 | up   | 10.15   | up   | 1.03 | up   | 1.37  | up   | 2.43 | up   | 2   |
| Os.48563.1.S1_x_at | LOC_Os01g45060 | polygalacturonase, putative                                                           | 1.09  | up   | 1.42 | down | 2.47    | down | 1.03 | down | 2.02  | down | 1.05 | down | 2   |
| Os.4862.1.S1_at    | LOC_Os02g50350 | dihydroorotate dihydrogenase protein, putative, expressed                             | 1.09  | down | 1.06 | up   | 5.04    | up   | 1.12 | up   | 1.35  | up   | 1.58 | up   | ABA |
| Os.4863.1.S1_at    | LOC_Os01g44050 | siroheme synthase, putative, expressed                                                | 5.83  | up   | 1.40 | down | 1.78    | up   | 1.12 | up   | 6.72  | up   | 1.12 | up   | 2   |
| Os.4863.2.S1_at    | LOC_Os01g44050 | siroheme synthase, putative, expressed                                                | 7.37  | up   | 1.62 | down | 1.96    | up   | 1.05 | up   | 7.80  | up   | 1.29 | up   | 2   |
| Os.48636.1.S1_at   | LOC_Os08g41400 | expressed protein                                                                     | 1.10  | up   | 1.06 | down | 3.00    | down | 1.35 | down | 1.39  | down | 1.47 | down | ABA |
| Os.4866.1.S1_at    | LOC_Os01g31980 | MATE efflux family protein, putative, expressed                                       | 1.00  | up   | 1.01 | down | 1.07    | down | 1.17 | up   | 2.15  | up   | 2.30 | up   | 2   |
| Os.4867.1.S1_at    | LOC_Os08g40680 | glycosyl hydrolase, putative, expressed                                               | 1.67  | down | 1.59 | up   | 7.02    | up   | 1.14 | up   | 2.96  | up   | 1.65 | up   | 2   |
| Os.48695.1.S1_s_at | EF575785       | Oryza sativa (indica cultivar-group) clone OSE-97-192-C10 putative serine threonine k | 2.05  | down | 1.06 | down | 8.58    | down | 1.68 | up   | 1.05  | up   | 1.13 | up   | 2   |
| Os.48695.1.S1_x_at | EF575785       | Oryza sativa (indica cultivar-group) clone OSE-97-192-C10 putative serine threonine k | 1.82  | down | 1.06 | down | 10.45   | down | 1.83 | up   | 1.05  | up   | 1.23 | up   | ABA |
| Os.48702.1.S1_at   | LOC_Os07g31960 | UDP-glucuronosyl and UDP-glucosyl transferase domain containing protein, expressed    | 1.02  | down | 1.71 | up   | 3.26    | down | 1.20 | up   | 1.12  | up   | 1.52 | up   | ABA |
| Os.48782.1.S1_at   | LOC_Os12g10520 | OsMADS33 - MADS-box family gene with MIKCC type-box, expressed                        | 1.01  | down | 1.03 | up   | 2.69    | up   | 1.03 | up   | 1.00  | up   | 1.08 | up   | ABA |
| Os.4881.1.S1_s_at  | LOC_Os07g41600 | proline-rich protein, putative, expressed                                             | 1.09  | up   | 1.01 | up   | 3.14    | up   | 1.10 | up   | 1.61  | up   | 2.23 | up   | 2   |
| Os.4882.1.S2_at    | AK106599       | Oryza sativa Japonica Group cDNA clone:002-112-B01, full insert sequence.             | 1.12  | down | 1.01 | up   | 2.28    | down | 1.10 | down | 1.09  | up   | 1.02 | down | ABA |
| Os.48830.1.S1_at   | LOC_Os07g38490 | GDP-fucose protein-O-fucosyltransferase 2, putative, expressed                        | 1.36  | down | 1.17 | down | 2.05    | down | 1.20 | down | 1.51  | down | 1.33 | up   | ABA |
| Os.48846.1.S1_at   | LOC_Os09g24840 | GASR10 - Gibberellin-regulated GASA/GAST/Snakin family protein precursor, expressed   | 4.97  | up   | 2.02 | up   | 1.23    | down | 1.54 | up   | 1.06  | up   | 1.20 | down | 2   |
| Os.48856.1.S1_at   | LOC_Os08g04110 | transporter, putative, expressed                                                      | 1.11  | down | 1.04 | down | 1.70    | down | 1.08 | down | 1.05  | up   | 2.40 | up   | JA  |
| Os.48857.1.S1_a_at | LOC_Os01g51840 | IQ calmodulin-binding motif family protein, putative, expressed                       | 1.00  | up   | 1.39 | down | 2.36    | down | 1.13 | down | 1.39  | down | 1.40 | down | ABA |
| Os.48871.1.A1_at   | LOC_Os05g27790 | membrane associated DUF588 domain containing protein, putative, expressed             | 1.19  | down | 1.20 | down | 5.66    | up   | 1.01 | down | 1.14  | up   | 1.94 | down | ABA |
| Os.4890.1.S1_at    | LOC_Os07g05570 | ERD4 protein, putative, expressed                                                     | 1.07  | down | 1.12 | down | 2.07    | down | 1.05 | down | 1.28  | down | 1.06 | down | ABA |
| Os.4891.1.S1_at    | LOC_Os03g06200 | aminotransferase, putative, expressed                                                 | 1.39  | up   | 1.16 | up   | 1.55    | down | 1.36 | up   | 2.49  | up   | 1.65 | up   | SA  |
| Os.4893.1.S1_at    | LOC_Os05g29810 | AP2 domain containing protein, expressed                                              | 1.18  | up   | 1.27 | up   | 8.34    | up   | 3.36 | up   | 1.62  | up   | 2.96 | up   | 3   |
| Os.48981.1.S1_at   | LOC_Os07g40240 | GASR9 - Gibberellin-regulated GASA/GAST/Snakin family protein precursor, expressed    | 1.02  | up   | 1.40 | down | 10.71   | up   | 1.68 | up   | 1.38  | up   | 1.27 | up   | ABA |
| Os.4900.2.A1_x_at  | LOC_Os03g11550 | protein of unknown function DUF1675 domain containing protein, expressed              | 1.07  | up   | 1.01 | up   | 4.86    | up   | 1.12 | up   | 1.11  | up   | 1.18 | down | ABA |
| Os.49023.1.S1_x_at | LOC_Os03g22680 | RING finger and CHY zinc finger domain-containing protein 1, putative, expressed      | 1.09  | down | 1.05 | up   | 6.01    | up   | 1.30 | up   | 1.01  | up   | 1.01 | down | ABA |
| Os.49030.1.A1_s_at | LOC_Os09g20220 | glutathione S-transferase, putative, expressed                                        | 17.60 | up   | 1.38 | up   | 14.72   | up   | 1.80 | up   | 27.68 | up   | 5.95 | up   | 4   |
| Os.49042.1.A1_s_at | LOC_Os01g09620 | zinc finger/CCH transcription factor, putative, expressed                             | 1.17  | up   | 1.09 | down | 2.14    | up   | 1.00 | up   | 1.20  | down | 1.19 | down | ABA |
| Os.49050.1.S1_at   | LOC_Os02g34580 | ammonium transporter protein, putative, expressed                                     | 3.17  | down | 2.02 | down | 5.09    | down | 1.15 | up   | 5.31  | down | 2.91 | down | 4   |
| Os.49073.1.S1_at   | LOC_Os01g12570 | 3-methyl-2-oxobutanoate hydroxymethyltransferase, putative, expressed                 | 1.05  | down | 4.09 | up   | 14.15   | up   | 1.25 | down | 6.32  | down | 7.51 | up   | 3   |
| Os.49088.1.S1_at   | LOC_Os04g44890 | tRNA-dihydrouridine synthase, putative, expressed                                     | 1.08  | down | 1.04 | up   | 2.44    | up   | 1.17 | up   | 1.69  | up   | 1.32 | up   | ABA |
| Os.49088.2.S1_at   | LOC_Os04g44890 | tRNA-dihydrouridine synthase, putative, expressed                                     | 1.02  | down | 1.32 | down | 4.19    | up   | 1.05 | up   | 1.62  | up   | 1.58 | up   | ABA |
| Os.49093.1.S1_a_at | LOC_Os02g02170 | transporter, major facilitator family, putative, expressed                            | 1.09  | up   | 1.75 | down | 2.10    | up   | 1.41 | down | 1.14  | up   | 1.50 | down | ABA |
| Os.49093.2.S1_x_at | LOC_Os02g02190 | transporter, major facilitator family, putative, expressed                            | 1.21  | up   | 2.05 | down | 1.57    | up   | 1.01 | down | 1.38  | up   | 1.04 | down | BAP |
| Os.49105.1.S1_at   | LOC_Os02g44770 | uncharacterized mscS family protein, putative, expressed                              | 1.15  | up   | 1.01 | down | 16.30   | up   | 1.16 | down | 2.66  | up   | 1.23 | up   | 2   |
| Os.49108.2.S1_x_at | LOC_Os04g32540 | OsSCP24 - Putative Serine Carboxypeptidase homologue, expressed                       | 1.01  | down | 1.05 | up   | 2.99    | down | 1.21 | down | 1.39  | down | 1.54 | down | ABA |
| Os.49109.1.S2_at   | LOC_Os08g38850 | phosphatidylinositol transfer, putative, expressed                                    | 1.56  | up   | 1.15 | up   | 2.22    | down | 1.03 | down | 1.18  | down | 1.13 | down | ABA |
| Os.49114.1.S1_at   | LOC_Os03g63550 | expressed protein                                                                     | 1.13  | down | 1.09 | down | 2.11    | down | 1.02 | up   | 1.29  | down | 1.01 | down | ABA |
| Os.49117.2.A1_at   | LOC_Os04g48830 | DUF623 domain containing protein, expressed                                           | 1.10  | down | 1.16 | down | 2.53    | up   | 1.02 | up   | 1.01  | up   | 1.04 | up   | ABA |
| Os.49120.1.S1_at   | AK064156       | membrane bound O-acyl transferase (MBOAT) family protein                              | 2.18  | down | 1.44 | up   | 3.86    | down | 1.30 | down | 1.19  | down | 1.19 | down | 2   |
| Os.49135.1.S1_at   | LOC_Os01g72520 | phosphoesterase family protein, putative, expressed                                   | 1.04  | up   | 1.40 | up   | 4.70    | up   | 1.21 | down | 1.61  | up   | 1.12 | down | ABA |
| Os.49146.1.S1_at   | LOC_Os05g51240 | hydrolase, alpha/beta fold family domain containing protein, expressed                | 1.25  | down | 1.15 | up   | 2.26    | down | 1.20 | down | 2.60  | down | 1.80 | down | 2   |
| Os.49149.1.S1_at   | AK106080       | plastid-lipid associated protein PAP / fibrillin family protein                       | 1.56  | up   | 1.39 | up   | 5.90    | down | 1.34 | down | 1.60  | down | 1.22 | down | ABA |
| Os.49151.1.S1_at   | LOC_Os01g44800 | expressed protein                                                                     | 1.51  | down | 1.69 | up   | 13.46   | up   | 1.46 | down | 1.31  | down | 1.68 | down | ABA |
| Os.49153.1.A1_x_at | LOC_Os10g39440 | transporter family protein, putative, expressed                                       | 1.06  | down | 1.15 | down | 3.08    | up   | 1.23 | down | 1.09  | down | 1.21 | down | ABA |
| Os.49160.1.S1_at   | LOC_Os04g40300 | transglutaminase, putative, expressed                                                 | 1.14  | up   | 1.05 | down | 2.26    | up   | 1.05 | down | 1.10  | up   | 1.09 | down | ABA |
| Os.49194.1.S1_at   | LOC_Os04g32840 | formin-like protein 20, putative, expressed                                           | 1.75  | down | 1.36 | down | 4.31    | down | 1.68 | up   | 1.37  | down | 1.89 | down | ABA |
| Os.49201.1.S1_at   | LOC_Os09g29820 | bZIP transcription factor domain containing protein, expressed                        | 1.83  | down | 1.16 | down | 3.09    | down | 1.46 | up   | 1.01  | up   | 1.16 | up   | ABA |
| Os.49208.1.S1_at   | LOC_Os04g34270 | serine/threonine-protein kinase receptor precursor, putative, expressed               | 1.29  | up   | 1.99 | down | 11.40   | down | 3.92 | up   | 2.84  | down | 1.01 | up   | 3   |
| Os.49242.1.S1_at   | LOC_Os05g46220 | mitochondrial carrier protein, putative, expressed                                    | 1.14  | down | 1.03 | down | 2.80    | up   | 1.02 | up   | 1.11  | up   | 1.19 | down | ABA |
| Os.49245.1.S1_at   | LOC_Os02g43330 | homeobox associated leucine zipper, putative, expressed                               | 1.13  | up   | 3.89 | down | 1298.28 | up   | 1.10 | down | 2.24  | up   | 1.12 | down | 3   |
| Os.49252.1.S1_x_at | AK069129       | Oryza sativa Japonica Group cDNA clone:J023007E02, full insert sequence.              | 1.04  | up   | 1.01 | up   | 2.18    | up   | 1.01 | down | 1.01  | down | 1.01 | up   | ABA |
| Os.49255.1.S1_at   | LOC_Os10g27300 | expressed protein                                                                     | 1.03  | down | 1.30 | up   | 2.54    | up   | 1.13 | up   | 1.55  | up   | 1.03 | up   | ABA |
| Os.49259.1.S1_at   | LOC_Os05g16824 | SHR5-receptor-like kinase, putative, expressed                                        | 1.22  | up   | 1.10 | down | 1.64    | up   | 1.19 | up   | 1.62  | up   | 8.47 | up   | JA  |
| Os.49290.1.S1_at   | LOC_Os06g39590 | OslAA23 - Auxin-responsive Aux/IAA gene family member, expressed                      | 1.54  | up   | 1.88 | up   | 3.55    | down | 1.28 | down | 1.18  | up   | 1.27 | down | ABA |



|                    |                |                                                                                       |      |      |      |      |         |      |      |      |       |      |       |      |     |
|--------------------|----------------|---------------------------------------------------------------------------------------|------|------|------|------|---------|------|------|------|-------|------|-------|------|-----|
| Os.49290.1.S1_x_at | LOC_Os06g39590 | OslIAA23 - Auxin-responsive Aux/IAA gene family member, expressed                     | 1.64 | up   | 1.74 | up   | 3.36    | down | 1.26 | down | 1.15  | up   | 1.22  | down | ABA |
| Os.49313.1.S1_a_at | LOC_Os03g55100 | cyclic nucleotide-gated ion channel 2, putative, expressed                            | 1.04 | down | 1.10 | down | 2.59    | up   | 1.52 | down | 1.01  | up   | 1.16  | down | ABA |
| Os.49324.1.S1_at   | LOC_Os04g44354 | UDP-glucuronosyl and UDP-glucosyl transferase domain containing protein, expressed    | 1.01 | down | 1.00 | up   | 1.03    | down | 1.07 | up   | 1.00  | up   | 8.86  | up   | JA  |
| Os.49352.1.S1_at   | LOC_Os11g15570 | Ser/Thr protein phosphatase family protein, putative, expressed                       | 1.93 | down | 1.44 | up   | 4.35    | down | 1.12 | down | 1.02  | down | 1.46  | up   | ABA |
| Os.4936.1.S1_at    | LOC_Os09g21340 | nucleobase-ascorbate transporter, putative, expressed                                 | 1.35 | up   | 1.14 | up   | 2.95    | up   | 1.01 | down | 1.10  | up   | 1.14  | down | ABA |
| Os.49369.1.S1_at   | LOC_Os06g42800 | STRUBBELIG-RECEPTOR FAMILY 8 precursor, putative, expressed                           | 1.11 | down | 1.06 | down | 2.27    | down | 1.39 | down | 1.31  | down | 1.14  | up   | ABA |
| Os.49381.1.S1_at   | LOC_Os08g26820 | plant protein of unknown function domain containing protein, expressed                | 1.40 | down | 1.16 | down | 5.87    | down | 1.04 | up   | 1.45  | down | 1.31  | down | ABA |
| Os.49410.1.A1_at   | LOC_Os04g33240 | sex determination protein tasselseed-2, putative, expressed                           | 1.23 | up   | 1.10 | down | 2.09    | up   | 1.42 | down | 2.83  | up   | 8.53  | up   | 3   |
| Os.49436.1.S1_x_at | LOC_Os04g45460 | cysteine-rich repeat secretory protein precursor, putative, expressed                 | 1.93 | up   | 1.03 | down | 1.11    | up   | 1.13 | down | 1.89  | down | 2.22  | down | JA  |
| Os.49442.2.S1_x_at | LOC_Os03g44760 | SWI1, putative, expressed                                                             | 1.24 | up   | 1.33 | up   | 2.61    | up   | 1.01 | up   | 1.11  | up   | 1.22  | down | ABA |
| Os.49448.1.S1_at   | LOC_Os01g72210 | early-responsive to dehydration protein-related, putative, expressed                  | 1.71 | up   | 1.58 | up   | 31.81   | up   | 1.60 | up   | 1.82  | up   | 1.02  | down | ABA |
| Os.4945.1.S1_at    | LOC_Os09g01960 | MYB family transcription factor, putative, expressed                                  | 1.19 | down | 1.74 | down | 2.64    | up   | 1.11 | up   | 1.05  | down | 1.39  | up   | ABA |
| Os.49451.1.S1_at   | LOC_Os08g34780 | adenylyl cyclase-associated protein, putative, expressed                              | 1.01 | down | 1.04 | up   | 13.55   | up   | 1.02 | up   | 1.00  | down | 1.02  | up   | ABA |
| Os.49453.1.S1_at   | LOC_Os02g08270 | class I glutamine amidotransferase, putative, expressed                               | 2.23 | down | 1.00 | down | 19.77   | down | 1.64 | down | 1.91  | down | 3.93  | up   | 3   |
| Os.49464.1.S1_at   | LOC_Os04g58560 | cysteine protease ATG4, putative, expressed                                           | 1.01 | down | 1.03 | up   | 2.11    | up   | 1.02 | down | 1.13  | up   | 1.03  | up   | ABA |
| Os.49475.1.S1_at   | LOC_Os03g25790 | glycosyl hydrolases family 17 protein, expressed                                      | 1.27 | up   | 1.16 | up   | 6.43    | up   | 1.10 | up   | 1.35  | up   | 1.26  | down | ABA |
| Os.49479.1.S1_at   | LOC_Os05g05020 | expressed protein                                                                     | 1.30 | down | 1.11 | up   | 1.14    | up   | 1.44 | down | 1.12  | up   | 2.09  | up   | JA  |
| Os.49482.1.S1_at   | LOC_Os01g12920 | thioesterase family protein, putative, expressed                                      | 1.00 | up   | 1.01 | down | 3.67    | up   | 1.27 | down | 1.33  | up   | 1.00  | down | ABA |
| Os.49488.1.S1_at   | LOC_Os09g25770 | auxin-induced protein 5NG4, putative, expressed                                       | 1.05 | down | 1.09 | down | 7.96    | up   | 1.35 | down | 2.04  | up   | 1.63  | up   | 2   |
| Os.49489.1.S1_at   | LOC_Os11g07950 | expressed protein                                                                     | 1.12 | up   | 1.11 | up   | 4.06    | down | 1.16 | up   | 1.22  | up   | 1.03  | up   | ABA |
| Os.49496.1.S1_at   | LOC_Os06g46500 | monocopper oxidase, putative, expressed                                               | 1.03 | down | 1.09 | up   | 3.20    | down | 1.28 | up   | 1.55  | down | 1.37  | up   | ABA |
| Os.49506.1.S1_at   | LOC_Os07g09010 | nodulin, putative, expressed                                                          | 1.57 | down | 1.11 | down | 3.97    | up   | 1.11 | down | 1.29  | up   | 1.02  | down | ABA |
| Os.49514.1.S1_at   | LOC_Os02g16680 | bZIP transcription factor domain containing protein, expressed                        | 1.06 | up   | 1.11 | down | 2.33    | up   | 1.17 | down | 1.16  | up   | 1.03  | down | ABA |
| Os.49521.1.S1_at   | LOC_Os04g36040 | peptide transporter PTR2, putative, expressed                                         | 1.20 | down | 2.35 | up   | 2.96    | up   | 1.20 | up   | 1.42  | up   | 1.46  | down | 2   |
| Os.49524.1.S1_at   | LOC_Os11g39990 | patatin, putative, expressed                                                          | 1.15 | down | 1.10 | down | 1.23    | down | 1.12 | up   | 1.53  | down | 2.71  | up   | JA  |
| Os.49526.1.S1_a_at | LOC_Os06g42560 | tryptophan synthase beta chain 2, putative, expressed                                 | 1.15 | up   | 1.20 | up   | 1.09    | up   | 1.15 | down | 2.62  | up   | 1.96  | up   | SA  |
| Os.49529.1.S1_at   | LOC_Os06g43810 | expressed protein                                                                     | 1.34 | down | 1.49 | up   | 4.68    | down | 1.12 | down | 1.65  | down | 1.85  | down | ABA |
| Os.49538.1.S1_at   | LOC_Os03g43010 | expressed protein                                                                     | 1.32 | down | 1.57 | up   | 4.35    | down | 1.20 | down | 1.88  | down | 2.23  | up   | 2   |
| Os.49545.1.S1_at   | LOC_Os11g32030 | sex determination protein tasselseed-2, putative, expressed                           | 3.52 | up   | 1.51 | down | 2.23    | down | 1.07 | up   | 1.65  | up   | 1.11  | up   | 2   |
| Os.49550.1.S1_at   | LOC_Os09g29120 | GRAM domain containing protein, expressed                                             | 1.20 | up   | 1.06 | down | 6.38    | up   | 1.25 | down | 1.26  | down | 1.23  | down | ABA |
| Os.49552.1.S1_at   | LOC_Os09g36900 | WD domain, G-beta repeat domain containing protein, expressed                         | 1.22 | down | 1.37 | down | 3.11    | down | 1.10 | down | 1.87  | down | 1.96  | down | ABA |
| Os.49568.1.S1_at   | LOC_Os04g56900 | transferase family protein, putative, expressed                                       | 1.82 | down | 2.94 | up   | 1.42    | down | 1.10 | down | 1.12  | up   | 1.24  | up   | BAP |
| Os.49572.1.A1_at   | LOC_Os06g11090 | CXE carboxylesterase, putative, expressed                                             | 1.42 | down | 1.13 | up   | 3.58    | up   | 1.07 | down | 1.07  | down | 1.06  | down | ABA |
| Os.49577.1.S1_at   | LOC_Os02g50340 | membrane attack complex component/perforin/complement C9, putative, expressed         | 1.38 | up   | 1.22 | up   | 5.66    | up   | 1.11 | up   | 2.66  | up   | 1.53  | down | 2   |
| Os.4958.1.A1_at    | LOC_Os01g68830 | expressed protein                                                                     | 1.16 | down | 1.05 | up   | 2.00    | down | 1.11 | down | 1.12  | down | 1.14  | down | ABA |
| Os.49588.1.S1_at   | AK287943       | zinc finger (C2H2 type) family protein                                                | 1.72 | up   | 1.11 | down | 5.38    | up   | 1.35 | up   | 1.17  | down | 1.04  | down | ABA |
| Os.49601.1.S1_at   | LOC_Os06g46940 | Os6bglu25 - beta-glucosidase homologue, similar to Os3bglu6, expressed                | 1.38 | up   | 1.17 | up   | 3.69    | up   | 1.13 | down | 2.02  | down | 1.08  | down | 2   |
| Os.49608.1.S1_at   | LOC_Os03g15340 | plastocyanin-like domain containing protein, putative, expressed                      | 1.07 | down | 2.14 | up   | 1.39    | up   | 2.14 | down | 2.58  | down | 11.38 | down | 4   |
| Os.49621.1.S1_at   | LOC_Os07g25590 | decarboxylase, putative, expressed                                                    | 1.03 | down | 1.18 | down | 2.86    | down | 1.08 | down | 1.47  | down | 1.23  | down | ABA |
| Os.4963.1.S1_at    | LOC_Os10g33240 | expressed protein                                                                     | 1.02 | down | 1.03 | up   | 4.88    | up   | 1.01 | up   | 1.01  | up   | 1.05  | up   | ABA |
| Os.49631.2.S1_x_at | LOC_Os07g33350 | hsp20/alpha crystallin family protein, putative, expressed                            | 1.25 | down | 1.16 | up   | 10.57   | down | 1.03 | up   | 1.60  | down | 1.26  | down | ABA |
| Os.49634.1.S1_x_at | LOC_Os01g55510 | dynein light chain type 1 domain containing protein, expressed                        | 1.20 | up   | 1.06 | up   | 2.59    | down | 1.01 | down | 1.02  | down | 1.81  | up   | ABA |
| Os.49639.1.S1_at   | LOC_Os06g21910 | late embryogenesis abundant group 1, putative, expressed                              | 1.01 | down | 1.01 | down | 1140.85 | up   | 1.01 | up   | 1.01  | up   | 1.08  | up   | ABA |
| Os.49648.1.S1_at   | LOC_Os02g54140 | hsp20/alpha crystallin family protein, putative, expressed                            | 1.01 | down | 1.16 | down | 54.09   | up   | 1.10 | down | 3.43  | up   | 1.03  | up   | 2   |
| Os.49648.1.S1_s_at | LOC_Os02g54140 | hsp20/alpha crystallin family protein, putative, expressed                            | 2.07 | down | 1.10 | down | 205.97  | up   | 1.01 | down | 7.06  | up   | 1.10  | up   | 3   |
| Os.4965.1.S1_at    | LOC_Os03g59440 | dirigent, putative, expressed                                                         | 2.50 | down | 1.51 | up   | 84.76   | down | 1.11 | up   | 18.46 | down | 2.13  | down | 4   |
| Os.49655.1.S1_at   | LOC_Os06g09420 | B3 DNA binding domain containing protein, expressed                                   | 1.10 | down | 1.01 | up   | 2.79    | down | 1.16 | down | 1.52  | down | 1.04  | down | ABA |
| Os.49657.1.S1_at   | LOC_Os09g28560 | protein phosphatase protein, putative, expressed                                      | 4.33 | up   | 1.16 | down | 3.42    | up   | 1.44 | up   | 1.27  | up   | 1.55  | down | 2   |
| Os.49658.1.S1_at   | LOC_Os05g45810 | calcineurin B, putative, expressed                                                    | 1.34 | up   | 1.06 | down | 4.66    | up   | 1.45 | down | 1.10  | down | 1.25  | down | ABA |
| Os.49662.1.S1_at   | LOC_Os09g31000 | EF hand family protein, expressed                                                     | 1.99 | down | 2.13 | up   | 1.06    | up   | 1.01 | up   | 1.31  | up   | 1.22  | up   | BAP |
| Os.49664.1.S1_at   | LOC_Os03g21160 | RNA-binding zinc finger protein, putative, expressed                                  | 1.07 | down | 1.11 | up   | 8.45    | down | 1.09 | down | 2.19  | down | 3.56  | down | 3   |
| Os.49668.1.S1_at   | LOC_Os03g16060 | expressed protein                                                                     | 1.67 | up   | 1.12 | down | 2.01    | down | 1.19 | up   | 1.13  | up   | 1.17  | up   | ABA |
| Os.49676.1.S1_at   | AK105164       | Oryza sativa (japonica cultivar-group) Os04g0649600 (Os04g0649600) mRNA, complete cds | 1.27 | up   | 1.19 | up   | 3.20    | up   | 1.26 | up   | 1.74  | down | 1.89  | down | ABA |
| Os.49677.1.S1_at   | LOC_Os11g07600 | ABC-2 type transporter domain containing protein, expressed                           | 1.22 | up   | 1.16 | up   | 7.92    | up   | 1.27 | down | 1.06  | down | 1.20  | up   | ABA |
| Os.4972.1.S1_at    | LOC_Os07g42280 | von Willebrand factor type A domain containing protein, expressed                     | 1.09 | down | 1.05 | down | 3.12    | up   | 1.23 | down | 1.59  | up   | 1.11  | down | ABA |

|                    |                |                                                                                        |      |      |      |      |         |      |      |      |      |      |      |      |     |
|--------------------|----------------|----------------------------------------------------------------------------------------|------|------|------|------|---------|------|------|------|------|------|------|------|-----|
| Os.49726.1.S1_at   | LOC_Os11g05470 | RCN1 Centroradialis-like1 homologous to TFL1 gene; contains Pfam profile PF01161: F    | 1.49 | down | 3.22 | down | 2.04    | up   | 1.04 | up   | 1.72 | up   | 2.19 | up   | 3   |
| Os.49731.1.S1_at   | LOC_Os02g21920 | CPuORF24 - conserved peptide uORF-containing transcript, expressed                     | 1.29 | up   | 1.01 | down | 2.99    | up   | 1.20 | up   | 1.49 | up   | 1.57 | up   | ABA |
| Os.49731.1.S1_s_at | LOC_Os02g21920 | CPuORF24 - conserved peptide uORF-containing transcript, expressed                     | 1.19 | up   | 1.06 | down | 3.00    | up   | 1.18 | up   | 1.45 | up   | 1.34 | up   | ABA |
| Os.4974.1.S1_at    | LOC_Os11g31190 | nodulin MtN3 family protein, putative, expressed                                       | 1.32 | up   | 1.56 | down | 1.55    | up   | 1.00 | up   | 4.78 | up   | 1.24 | down | SA  |
| Os.4974.1.S1_x_at  | LOC_Os11g31190 | nodulin MtN3 family protein, putative, expressed                                       | 1.25 | up   | 1.68 | down | 1.27    | up   | 1.06 | down | 3.97 | up   | 1.40 | down | SA  |
| Os.49745.1.S1_at   | LOC_Os03g41460 | CAMK_CAMK_like.20 - CAMK includes calcium/calmodulin dependent protein kinases, d      | 1.23 | up   | 1.14 | down | 2.98    | up   | 1.05 | down | 1.03 | up   | 1.18 | down | ABA |
| Os.49755.1.S1_at   | AF402802       | Oryza sativa (japonica cultivar-group) clone S14087 putative glutathione S-transferase | 4.27 | up   | 1.02 | down | 1.34    | up   | 1.02 | up   | 4.13 | up   | 2.19 | up   | 3   |
| Os.49762.1.S1_at   | LOC_Os02g36924 | OsMADS27 - MADS-box family gene with MIKCC type-box, expressed                         | 2.07 | up   | 1.43 | down | 2.01    | up   | 1.15 | up   | 1.74 | up   | 1.04 | down | 2   |
| Os.49764.1.S1_at   | LOC_Os01g45659 | hypothetical protein                                                                   | 1.18 | down | 1.51 | up   | 1254.07 | up   | 1.01 | up   | 1.52 | up   | 1.07 | down | ABA |
| Os.49771.1.S1_at   | LOC_Os08g07740 | histone-like transcription factor and archaeal histone, putative, expressed            | 1.60 | down | 1.17 | down | 6.03    | down | 1.22 | down | 1.39 | down | 1.24 | down | ABA |
| Os.49784.1.S1_at   | LOC_Os11g12530 | receptor-like protein kinase 5 precursor, putative, expressed                          | 2.42 | down | 1.88 | up   | 1.54    | up   | 1.04 | up   | 2.02 | down | 2.44 | down | 3   |
| Os.49785.1.S1_at   | LOC_Os03g51110 | MYB family transcription factor, putative, expressed                                   | 1.21 | up   | 1.06 | down | 2.69    | up   | 1.05 | up   | 1.04 | down | 1.31 | up   | ABA |
| Os.49786.1.S1_at   | LOC_Os06g36320 | receptor-like protein kinase 5 precursor, putative, expressed                          | 1.02 | up   | 1.00 | up   | 3.40    | up   | 1.00 | up   | 1.01 | up   | 1.02 | up   | ABA |
| Os.49787.1.S1_at   | LOC_Os01g64360 | MYB family transcription factor, putative, expressed                                   | 1.14 | down | 1.10 | up   | 19.38   | up   | 1.02 | up   | 1.94 | up   | 1.75 | up   | ABA |
| Os.49814.1.S1_at   | LOC_Os09g37949 | serine/threonine-protein kinase SRPK1, putative, expressed                             | 1.15 | up   | 1.16 | down | 2.39    | up   | 1.00 | down | 1.02 | up   | 1.28 | up   | ABA |
| Os.49816.1.S1_at   | LOC_Os04g51040 | OsWAK50 - OsWAK receptor-like protein kinase, expressed                                | 1.30 | down | 1.16 | down | 1.33    | down | 1.07 | up   | 1.03 | up   | 2.11 | up   | JA  |
| Os.49818.1.S1_s_at | LOC_Os07g35310 | TKL_IRAK_DUF26-1c.12 - DUF26 kinases have homology to DUF26 containing loci, ex        | 1.07 | down | 1.14 | down | 4.75    | down | 2.42 | up   | 1.18 | up   | 2.58 | up   | 3   |
| Os.49829.1.S1_at   | LOC_Os02g40530 | MYB family transcription factor, putative, expressed                                   | 1.05 | down | 1.24 | up   | 65.02   | up   | 1.01 | down | 1.17 | up   | 1.32 | up   | ABA |
| Os.4983.1.S1_at    | CT831877       | Oryza sativa (indica cultivar-group) cDNA clone:OSIGCRA102M02, full insert sequenc     | 1.03 | down | 1.34 | down | 2.18    | up   | 1.06 | down | 1.03 | up   | 1.05 | down | ABA |
| Os.49838.1.S1_at   | LOC_Os04g47720 | cis-zeatin O-glucosyltransferase, putative, expressed                                  | 1.24 | up   | 1.12 | up   | 13.23   | up   | 1.62 | down | 4.58 | up   | 2.87 | up   | 3   |
| Os.49844.1.S1_at   | LOC_Os06g37750 | S-locus-like receptor protein kinase, putative, expressed                              | 1.75 | down | 1.24 | down | 7.91    | down | 1.55 | up   | 3.40 | down | 1.22 | down | 2   |
| Os.49849.1.S1_at   | LOC_Os09g27010 | tyrosine protein kinase domain containing protein, putative, expressed                 | 1.78 | up   | 1.02 | up   | 2.29    | up   | 1.19 | down | 1.57 | down | 1.34 | up   | ABA |
| Os.49865.1.S1_at   | LOC_Os02g54780 | CYPRO4, putative, expressed                                                            | 1.42 | up   | 1.03 | down | 2.87    | up   | 1.15 | down | 1.28 | up   | 1.37 | down | ABA |
| Os.49891.1.S1_at   | LOC_Os07g03060 | expressed protein                                                                      | 1.04 | down | 1.15 | down | 2.32    | up   | 1.01 | up   | 1.04 | up   | 1.03 | down | ABA |
| Os.49920.2.S1_at   | LOC_Os03g61780 | glucan endo-1,3-beta-glucosidase-related, putative, expressed                          | 1.29 | down | 1.37 | up   | 5.56    | down | 1.13 | down | 1.00 | up   | 1.45 | down | ABA |
| Os.49940.1.S1_at   | LOC_Os04g10650 | CDT1A - Putative DNA replication initiation protein, expressed                         | 1.24 | down | 1.12 | down | 5.19    | down | 1.10 | up   | 1.40 | down | 1.47 | down | ABA |
| Os.49950.1.S1_at   | LOC_Os11g35450 | leucine-rich repeat receptor protein kinase EXS precursor, putative, expressed         | 1.22 | down | 1.22 | down | 12.93   | down | 1.96 | up   | 2.95 | down | 2.30 | down | 4   |
| Os.49964.1.S2_at   | AK120918       | Oryza sativa Japonica Group cDNA clone:J023034N15, full insert sequence.               | 1.02 | down | 1.01 | down | 5.75    | up   | 1.04 | up   | 1.02 | down | 1.02 | down | ABA |
| Os.49981.1.A1_at   | LOC_Os12g43000 | retrotransposon protein, putative, unclassified, expressed                             | 1.85 | up   | 1.26 | up   | 2.18    | up   | 1.45 | down | 1.13 | down | 1.46 | down | ABA |
| Os.49988.1.S1_at   | LOC_Os12g40940 | expressed protein                                                                      | 1.03 | down | 1.04 | down | 2.08    | up   | 1.02 | up   | 1.00 | down | 1.04 | up   | ABA |
| Os.49994.1.S1_at   | LOC_Os03g14880 | expressed protein                                                                      | 1.27 | down | 1.25 | up   | 2.19    | down | 1.04 | down | 1.66 | down | 1.01 | down | ABA |
| Os.49996.1.S1_at   | LOC_Os06g49220 | peptide transporter, putative, expressed                                               | 1.97 | down | 1.06 | up   | 18.53   | down | 1.12 | down | 2.02 | down | 1.14 | down | 3   |
| Os.50005.1.S1_at   | LOC_Os08g36390 | ZOS8-07 - C2H2 zinc finger protein, expressed                                          | 1.21 | up   | 1.21 | up   | 2.48    | up   | 1.21 | up   | 1.24 | up   | 1.21 | up   | ABA |
| Os.50007.1.S1_at   | LOC_Os05g38470 | expressed protein                                                                      | 1.26 | up   | 1.08 | down | 3.71    | up   | 1.16 | down | 1.12 | up   | 1.38 | down | ABA |
| Os.50014.1.S1_at   | LOC_Os03g38050 | galactosyltransferase, putative, expressed                                             | 1.14 | down | 1.30 | down | 4.33    | down | 1.01 | down | 1.16 | down | 1.37 | up   | ABA |
| Os.50018.1.S1_at   | LOC_Os07g47750 | POEI49 - Pollen Ole e l allergen and extensin family protein precursor, expressed      | 1.17 | down | 1.50 | down | 7.04    | down | 1.27 | down | 1.22 | down | 1.76 | down | ABA |
| Os.50019.1.S1_at   | LOC_Os03g04080 | expressed protein                                                                      | 1.75 | up   | 1.63 | up   | 94.99   | up   | 1.02 | up   | 1.67 | up   | 1.23 | down | ABA |
| Os.50023.1.S1_at   | LOC_Os02g58740 | expressed protein                                                                      | 1.36 | up   | 1.25 | down | 2.52    | down | 1.05 | down | 1.05 | up   | 1.04 | down | ABA |
| Os.50023.1.S1_x_at | LOC_Os02g58740 | expressed protein                                                                      | 1.23 | up   | 1.26 | down | 2.44    | down | 1.03 | up   | 1.07 | up   | 1.08 | down | ABA |
| Os.50053.1.A1_at   | LOC_Os07g05940 | 9-cis-epoxycarotenoid dioxygenase 1, chloroplast precursor, putative, expressed        | 1.69 | up   | 1.22 | up   | 78.30   | up   | 1.03 | up   | 1.11 | up   | 1.42 | up   | ABA |
| Os.50054.1.S1_x_at | LOC_Os06g04090 | no apical meristem protein, putative, expressed                                        | 1.03 | up   | 1.53 | up   | 3.35    | down | 1.14 | down | 1.80 | down | 1.06 | down | ABA |
| Os.50104.1.S1_at   | LOC_Os06g40180 | phospholipase D, putative, expressed                                                   | 1.26 | down | 2.21 | down | 16.85   | down | 1.64 | down | 4.17 | down | 8.14 | up   | 4   |
| Os.50119.1.S1_at   | LOC_Os02g36414 | transporter family protein, putative, expressed                                        | 1.59 | down | 1.02 | down | 16.39   | down | 1.31 | up   | 2.50 | down | 1.94 | down | 2   |
| Os.50129.1.S1_at   | AK119921       | ankyrin repeat family protein                                                          | 1.02 | down | 1.16 | up   | 22.70   | up   | 1.03 | up   | 1.48 | up   | 2.09 | up   | 2   |
| Os.50134.1.S1_at   | LOC_Os05g49730 | protein phosphatase 2C, putative, expressed                                            | 1.12 | down | 1.11 | down | 126.79  | up   | 1.01 | up   | 1.01 | up   | 1.02 | up   | ABA |
| Os.50134.2.S1_at   | AK119929       | protein phosphatase 2C ABI1 / PP2C ABI1 / abscisic acid-insensitive 1                  | 1.01 | down | 1.00 | up   | 19.52   | up   | 1.00 | down | 1.00 | down | 1.02 | up   | ABA |
| Os.50139.1.S1_at   | LOC_Os09g08280 | expressed protein                                                                      | 1.00 | down | 1.01 | up   | 12.45   | up   | 1.02 | up   | 1.01 | down | 1.04 | up   | ABA |
| Os.50155.1.S1_at   | LOC_Os06g12960 | expressed protein                                                                      | 1.84 | down | 1.15 | up   | 2.23    | up   | 1.01 | up   | 1.28 | up   | 1.14 | up   | ABA |
| Os.5016.1.S1_at    | LOC_Os03g55070 | UDP-glucose 6-dehydrogenase, putative, expressed                                       | 1.00 | up   | 1.13 | down | 2.11    | down | 1.28 | up   | 1.35 | down | 2.41 | up   | 2   |
| Os.50175.2.S1_at   | LOC_Os04g51820 | OshKT1;1 - Na+ transporter, expressed                                                  | 1.09 | down | 1.33 | down | 9.92    | up   | 1.07 | down | 1.01 | down | 1.16 | down | ABA |
| Os.50222.1.S1_at   | LOC_Os12g24800 | 9-cis-epoxycarotenoid dioxygenase 1, chloroplast precursor, putative, expressed        | 1.25 | down | 2.35 | down | 1.46    | down | 1.50 | down | 1.40 | down | 1.43 | up   | BAP |
| Os.50227.1.S1_at   | LOC_Os08g04400 | pentatricopeptide repeat domain containing protein, putative, expressed                | 1.22 | up   | 1.55 | up   | 2.23    | down | 1.55 | down | 1.24 | down | 1.41 | down | ABA |
| Os.50234.1.S1_at   | LOC_Os06g47930 | expressed protein                                                                      | 1.04 | down | 1.24 | up   | 3.16    | down | 1.98 | down | 1.76 | down | 1.92 | down | ABA |
| Os.50236.1.S1_at   | LOC_Os11g40540 | transporter family protein, putative, expressed                                        | 1.01 | down | 1.16 | down | 2.56    | up   | 1.05 | down | 1.05 | down | 1.11 | down | ABA |
| Os.50249.1.S1_x_at | LOC_Os03g21640 | expressed protein                                                                      | 1.49 | up   | 1.18 | up   | 2.48    | up   | 1.03 | up   | 1.62 | up   | 1.14 | down | ABA |

|                    |                |                                                                                      |      |      |      |      |       |      |      |      |      |      |       |      |     |
|--------------------|----------------|--------------------------------------------------------------------------------------|------|------|------|------|-------|------|------|------|------|------|-------|------|-----|
| Os.50251.1.S1_at   | LOC_Os09g07660 | ELMO/CED-12 family protein, putative, expressed                                      | 1.05 | up   | 1.01 | up   | 2.21  | up   | 1.22 | down | 1.29 | up   | 1.19  | up   | ABA |
| Os.50275.1.S1_at   | LOC_Os01g58400 | zinc finger C3HC4 type family protein, putative, expressed                           | 1.13 | up   | 1.12 | down | 2.19  | up   | 1.14 | down | 1.06 | up   | 1.21  | down | ABA |
| Os.5028.1.S1_at    | LOC_Os02g48870 | aspartic proteinase nepenthesin-2 precursor, putative, expressed                     | 1.68 | down | 1.13 | down | 3.80  | down | 1.20 | up   | 1.43 | down | 1.01  | up   | ABA |
| Os.50285.2.S1_x_at | LOC_Os03g31180 | diacylglycerol kinase 1, putative, expressed                                         | 1.72 | up   | 1.40 | down | 9.78  | up   | 1.31 | down | 1.03 | up   | 1.03  | down | ABA |
| Os.50287.1.S1_at   | LOC_Os04g39010 | heavy metal associated domain containing protein, expressed                          | 1.07 | down | 1.07 | down | 2.27  | up   | 1.36 | down | 1.09 | down | 1.43  | up   | ABA |
| Os.50295.1.S1_at   | LOC_Os12g29740 | expressed protein                                                                    | 1.01 | down | 1.00 | up   | 4.56  | up   | 1.03 | up   | 1.15 | down | 1.09  | down | ABA |
| Os.50299.1.S1_at   | LOC_Os02g27070 | PPR repeat domain containing protein, putative, expressed                            | 1.04 | down | 1.68 | up   | 6.37  | down | 1.16 | down | 1.70 | down | 1.40  | down | ABA |
| Os.50300.1.S1_at   | LOC_Os06g20040 | aspartic proteinase nepenthesin-2 precursor, putative, expressed                     | 1.44 | up   | 1.70 | down | 2.30  | up   | 1.10 | down | 1.08 | up   | 1.60  | up   | ABA |
| Os.50329.1.S1_s_at | LOC_Os08g36860 | cytochrome P450, putative, expressed                                                 | 1.05 | up   | 1.69 | up   | 30.66 | up   | 1.41 | down | 2.89 | up   | 1.37  | up   | 2   |
| Os.50342.1.S1_at   | LOC_Os04g52780 | leucine-rich repeat receptor protein kinase EXS precursor, putative, expressed       | 1.09 | down | 1.03 | up   | 2.70  | down | 1.68 | up   | 1.69 | up   | 1.48  | down | ABA |
| Os.50346.1.S1_at   | LOC_Os05g04680 | expressed protein                                                                    | 1.69 | up   | 1.36 | up   | 12.36 | down | 1.47 | down | 1.18 | down | 1.44  | up   | ABA |
| Os.50360.1.S1_at   | LOC_Os05g45490 | hydrolase, acting on carbon-nitrogen, putative, expressed                            | 1.10 | up   | 1.00 | down | 2.30  | down | 1.00 | up   | 1.41 | down | 1.72  | up   | ABA |
| Os.50371.1.S1_x_at | LOC_Os05g05620 | glutathione S-transferase, putative, expressed                                       | 1.15 | down | 1.01 | down | 2.26  | down | 1.30 | down | 1.05 | down | 4.33  | up   | 2   |
| Os.50381.1.S1_at   | LOC_Os11g09150 | expressed protein                                                                    | 1.07 | up   | 1.00 | up   | 5.28  | up   | 1.06 | down | 1.01 | down | 1.36  | down | ABA |
| Os.50384.1.S1_at   | LOC_Os02g32760 | 60S acidic ribosomal protein, putative, expressed                                    | 1.07 | down | 1.04 | down | 3.27  | down | 1.00 | down | 1.67 | down | 1.20  | down | ABA |
| Os.50386.1.S1_at   | LOC_Os05g35010 | cytochrome P450, putative, expressed                                                 | 1.12 | up   | 1.02 | up   | 2.64  | up   | 1.07 | up   | 1.42 | up   | 1.04  | down | ABA |
| Os.50391.1.S1_at   | LOC_Os03g13030 | lecithin cholesterol acyltransferase, putative, expressed                            | 1.08 | up   | 1.11 | up   | 3.23  | down | 1.34 | down | 1.07 | down | 1.33  | down | ABA |
| Os.50393.1.S1_at   | LOC_Os02g51680 | uncharacterized glycosyl hydrolase Rv2006/MT2062, putative, expressed                | 1.07 | up   | 2.56 | down | 2.54  | up   | 1.73 | down | 1.66 | up   | 1.25  | down | 2   |
| Os.50395.1.S1_at   | LOC_Os12g31000 | pumilio-family RNA binding repeat domain containing protein, expressed               | 2.60 | up   | 1.99 | down | 25.37 | down | 1.09 | up   | 1.99 | down | 1.45  | down | 3   |
| Os.50398.1.S1_at   | LOC_Os02g44090 | zinc finger protein, putative, expressed                                             | 1.86 | up   | 1.43 | up   | 10.77 | up   | 1.10 | up   | 1.12 | up   | 1.01  | up   | ABA |
| Os.50399.1.S1_at   | LOC_Os06g05420 | expressed protein                                                                    | 1.96 | up   | 1.38 | down | 8.33  | up   | 1.53 | down | 8.74 | up   | 1.86  | up   | 3   |
| Os.50400.1.S1_at   | LOC_Os05g35060 | DUF803 domain containing, putative, expressed                                        | 1.02 | down | 1.06 | down | 2.02  | down | 1.18 | down | 1.72 | down | 1.17  | up   | ABA |
| Os.50402.1.S1_at   | LOC_Os03g03334 | expressed protein                                                                    | 1.65 | up   | 6.22 | up   | 2.41  | down | 1.16 | up   | 1.22 | up   | 1.07  | up   | 2   |
| Os.50413.1.S1_at   | LOC_Os04g01690 | pyridoxal-dependent decarboxylase protein, putative, expressed                       | 1.94 | down | 1.01 | down | 1.38  | down | 1.96 | down | 2.50 | up   | 20.22 | up   | 3   |
| Os.50416.1.S1_at   | LOC_Os08g42530 | SFC, putative, expressed                                                             | 1.39 | down | 1.41 | down | 4.38  | down | 1.17 | down | 1.41 | down | 1.60  | down | ABA |
| Os.50438.1.S1_at   | CT828313       | Oryza sativa (indica cultivar-group) cDNA clone:OSIGCP1012B19, full insert sequence. | 2.74 | up   | 1.24 | up   | 1.87  | up   | 1.07 | up   | 2.06 | up   | 2.06  | up   | 3   |
| Os.50455.1.S1_at   | LOC_Os06g40170 | phospholipase D, putative, expressed                                                 | 1.01 | up   | 1.48 | down | 5.51  | down | 1.03 | up   | 1.41 | down | 6.77  | up   | 2   |
| Os.50460.1.S1_at   | LOC_Os03g59620 | phospholipase, patatin family, putative, expressed                                   | 1.23 | down | 1.25 | up   | 2.54  | up   | 1.05 | up   | 1.04 | up   | 1.11  | down | ABA |
| Os.50466.1.S1_at   | AK121303       | Oryza sativa Japonica Group cDNA clone:J023111B15, full insert sequence.             | 1.07 | down | 1.04 | down | 2.04  | down | 1.10 | up   | 1.40 | down | 1.16  | up   | ABA |
| Os.50468.1.S1_at   | LOC_Os03g15320 | glyoxal oxidase-related, putative, expressed                                         | 1.22 | down | 1.11 | up   | 9.00  | down | 1.08 | down | 4.02 | down | 2.93  | down | 3   |
| Os.50470.1.S1_at   | LOC_Os01g71310 | cytokinin dehydrogenase precursor, putative, expressed                               | 3.46 | up   | 3.68 | up   | 1.38  | up   | 1.33 | down | 1.44 | down | 1.33  | down | 2   |
| Os.50478.1.S1_at   | LOC_Os05g25350 | TKL_IRAK_CrRLK1L-1.12 - The CrRLK1L-1 subfamily has homology to the CrRLK1L          | 1.06 | up   | 1.02 | up   | 15.52 | down | 1.20 | up   | 1.90 | down | 28.60 | down | 2   |
| Os.50487.1.S1_at   | LOC_Os03g21960 | aminotransferase, putative, expressed                                                | 1.36 | up   | 4.40 | down | 15.30 | down | 1.32 | down | 2.03 | down | 4.06  | down | 4   |
| Os.5049.1.S1_at    | LOC_Os10g20470 | MATE efflux family protein, putative, expressed                                      | 1.61 | up   | 1.36 | down | 6.32  | up   | 1.30 | up   | 2.74 | up   | 2.42  | up   | 3   |
| Os.50494.1.A1_at   | LOC_Os06g50180 | DUF803 domain containing, putative, expressed                                        | 1.25 | down | 1.16 | down | 2.08  | down | 1.24 | down | 1.09 | up   | 1.09  | down | ABA |
| Os.50498.1.S1_at   | LOC_Os01g03549 | multi-copper oxidase type I family protein, putative, expressed                      | 1.54 | up   | 1.22 | down | 5.12  | down | 1.36 | up   | 1.74 | down | 1.18  | up   | ABA |
| Os.50575.1.S1_at   | LOC_Os04g40700 | steroid nuclear receptor, ligand-binding, putative, expressed                        | 1.20 | up   | 1.32 | down | 5.22  | up   | 1.19 | down | 1.36 | up   | 1.28  | down | ABA |
| Os.50575.2.S1_x_at | LOC_Os04g40700 | steroid nuclear receptor, ligand-binding, putative, expressed                        | 1.41 | up   | 1.24 | down | 5.49  | up   | 1.69 | down | 1.31 | up   | 1.24  | down | ABA |
| Os.50583.1.S1_at   | LOC_Os03g60260 | ANT1, putative, expressed                                                            | 1.02 | up   | 1.05 | up   | 2.37  | up   | 1.08 | up   | 1.08 | up   | 1.29  | up   | ABA |
| Os.50588.1.S1_at   | LOC_Os11g34370 | phospholipase, patatin family, putative, expressed                                   | 1.29 | up   | 1.13 | up   | 2.58  | up   | 1.16 | down | 1.41 | up   | 1.02  | up   | ABA |
| Os.50594.1.S1_at   | LOC_Os04g46680 | ZOS4-10 - C2H2 zinc finger protein, expressed                                        | 1.00 | down | 1.00 | up   | 3.00  | up   | 1.00 | up   | 1.00 | down | 1.01  | up   | ABA |
| Os.50596.1.S1_at   | LOC_Os04g40680 | expressed protein                                                                    | 5.63 | up   | 1.06 | down | 1.81  | up   | 1.38 | down | 2.21 | up   | 1.72  | up   | 2   |
| Os.50598.1.S1_at   | LOC_Os12g03370 | harpin-induced protein 1 domain containing protein, expressed                        | 2.10 | down | 1.25 | down | 1.00  | down | 1.71 | up   | 1.98 | up   | 1.25  | up   | IAA |
| Os.50606.1.S1_at   | LOC_Os12g05394 | protein kinase, putative, expressed                                                  | 4.95 | up   | 1.34 | down | 1.46  | down | 1.48 | down | 1.31 | down | 1.43  | down | IAA |
| Os.50620.1.S1_at   | LOC_Os12g44190 | ATPase 3, putative, expressed                                                        | 1.71 | down | 1.69 | down | 9.15  | down | 1.34 | up   | 2.38 | up   | 1.74  | up   | 2   |
| Os.50632.1.S1_x_at | LOC_Os10g35940 | folypolyglutamate synthetase, putative, expressed                                    | 1.43 | up   | 1.41 | up   | 8.25  | down | 1.06 | down | 1.71 | down | 1.26  | down | ABA |
| Os.5064.1.S1_at    | LOC_Os05g06440 | dnaJ homolog subfamily B member 11 precursor, putative, expressed                    | 1.44 | down | 1.11 | up   | 2.35  | down | 1.12 | up   | 1.22 | down | 1.33  | up   | ABA |
| Os.50640.1.S1_at   | LOC_Os04g33740 | glycosyl hydrolases, putative, expressed                                             | 1.20 | down | 1.11 | up   | 6.70  | down | 1.55 | up   | 1.29 | down | 1.24  | up   | ABA |
| Os.50642.1.S1_at   | LOC_Os04g48030 | heat stress transcription factor B-1, putative, expressed                            | 2.10 | down | 1.05 | down | 6.18  | up   | 1.02 | up   | 1.79 | up   | 1.03  | up   | 2   |
| Os.50659.1.S1_at   | AJ490355       | Oryza sativa z134b snoRNA.                                                           | 3.86 | down | 1.60 | down | 1.04  | down | 1.37 | up   | 1.70 | down | 1.16  | up   | IAA |
| Os.5066.1.S1_at    | LOC_Os01g12000 | expressed protein                                                                    | 1.55 | up   | 1.21 | down | 1.07  | up   | 1.46 | up   | 1.48 | up   | 2.26  | up   | JA  |
| Os.50743.1.S1_at   | LOC_Os02g43900 | expressed protein                                                                    | 1.24 | up   | 1.01 | down | 2.98  | down | 1.85 | down | 1.16 | down | 1.14  | down | ABA |
| Os.50750.1.S1_at   | LOC_Os03g02190 | protein kinase domain containing protein, expressed                                  | 1.37 | down | 1.01 | down | 7.70  | down | 1.17 | down | 1.45 | down | 1.08  | up   | ABA |
| Os.50763.1.S1_at   | LOC_Os03g30260 | COBRA-like protein precursor, putative, expressed                                    | 1.19 | down | 1.11 | down | 3.49  | down | 1.02 | down | 1.56 | down | 1.76  | down | ABA |
| Os.50771.1.S1_at   | LOC_Os06g44320 | expressed protein                                                                    | 1.93 | up   | 1.49 | up   | 2.74  | down | 1.09 | up   | 1.02 | down | 1.12  | down | ABA |

|                    |                |                                                                                       |      |      |      |      |       |      |      |      |      |      |      |      |     |
|--------------------|----------------|---------------------------------------------------------------------------------------|------|------|------|------|-------|------|------|------|------|------|------|------|-----|
| Os.50776.1.S1_at   | CT833789       | Oryza sativa (indica cultivar-group) cDNA clone:OSIGCSN032F14, full insert sequence   | 1.05 | up   | 1.22 | up   | 2.44  | down | 1.34 | down | 1.34 | down | 1.72 | down | ABA |
| Os.50786.1.S1_at   | NM_001052476   | Oryza sativa (japonica cultivar-group) Os02g0156300 (Os02g0156300) mRNA, complete cds | 1.34 | up   | 1.28 | up   | 3.84  | up   | 1.21 | up   | 1.57 | up   | 1.41 | up   | ABA |
| Os.50788.1.A1_at   | LOC_Os06g43044 | GDSL-like lipase/acylhydrolase, putative, expressed                                   | 1.07 | down | 1.02 | up   | 2.50  | down | 1.20 | down | 1.26 | down | 1.25 | down | ABA |
| Os.50791.1.S1_at   | LOC_Os02g53530 | ZOS2-17 - C2H2 zinc finger protein, expressed                                         | 1.07 | down | 1.11 | up   | 6.62  | down | 1.15 | down | 1.10 | down | 1.37 | down | ABA |
| Os.50798.1.S1_at   | LOC_Os08g01480 | cytochrome P450, putative, expressed                                                  | 1.34 | down | 5.30 | up   | 1.18  | up   | 1.04 | down | 2.97 | up   | 2.73 | up   | 3   |
| Os.50799.1.S1_at   | LOC_Os04g48130 | OsRhmbd11 - Putative Rhomboid homologue, expressed                                    | 1.30 | up   | 1.07 | up   | 11.42 | down | 1.04 | up   | 1.94 | down | 1.18 | down | ABA |
| Os.50805.1.S1_at   | LOC_Os08g20130 | flavonol sulfotransferase, putative, expressed                                        | 1.88 | down | 1.29 | down | 4.04  | down | 2.41 | down | 1.36 | down | 2.49 | up   | 3   |
| Os.50813.1.S1_at   | LOC_Os09g26570 | CAAX amino terminal protease family protein, putative, expressed                      | 1.12 | down | 1.18 | down | 7.22  | up   | 1.17 | down | 1.43 | up   | 1.13 | down | ABA |
| Os.50825.1.S1_s_at | LOC_Os05g39990 | expansin precursor, putative, expressed                                               | 1.80 | up   | 3.04 | up   | 8.68  | down | 1.68 | up   | 1.40 | down | 1.48 | down | 2   |
| Os.50831.1.S1_at   | LOC_Os02g32580 | expressed protein                                                                     | 1.17 | up   | 1.80 | down | 7.15  | up   | 1.01 | up   | 1.09 | up   | 1.20 | up   | ABA |
| Os.50846.1.S1_s_at | LOC_Os01g10490 | keratin, type I cytoskeletal 9, putative, expressed                                   | 1.35 | down | 1.10 | down | 2.04  | down | 1.11 | up   | 1.02 | down | 1.13 | down | ABA |
| Os.50849.1.S1_at   | LOC_Os03g15690 | phosphate carrier protein, mitochondrial precursor, putative, expressed               | 1.20 | down | 1.27 | up   | 2.90  | down | 1.01 | down | 1.33 | down | 1.13 | down | ABA |
| Os.50858.1.S1_at   | LOC_Os02g47780 | hydrolase, alpha/beta fold family domain containing protein, expressed                | 2.34 | up   | 1.47 | up   | 5.00  | up   | 1.30 | down | 1.83 | up   | 1.35 | down | 2   |
| Os.50861.1.S1_at   | LOC_Os04g42700 | receptor-like protein kinase precursor, putative, expressed                           | 1.15 | down | 1.37 | up   | 2.54  | up   | 1.02 | down | 1.01 | down | 1.22 | down | ABA |
| Os.5087.1.S1_at    | LOC_Os11g03780 | alpha-N-arabinfuranosidase, putative, expressed                                       | 1.03 | down | 1.09 | down | 14.20 | up   | 1.01 | up   | 1.05 | up   | 1.14 | down | ABA |
| Os.50876.1.S1_at   | LOC_Os06g04150 | magnesium-protoporphyrin O-methyltransferase, putative, expressed                     | 1.44 | up   | 1.17 | up   | 6.77  | down | 1.10 | down | 2.44 | down | 1.35 | down | 2   |
| Os.50879.1.S1_at   | LOC_Os09g38510 | purine permease, putative, expressed                                                  | 1.47 | up   | 1.61 | down | 6.58  | up   | 1.68 | down | 1.45 | up   | 1.39 | down | ABA |
| Os.50883.1.S1_at   | LOC_Os04g51520 | glycosyl hydrolases family 16, putative, expressed                                    | 1.04 | up   | 3.48 | up   | 2.06  | up   | 1.09 | up   | 2.70 | down | 3.21 | down | 4   |
| Os.50896.1.S1_at   | LOC_Os01g66010 | amino acid transporter, putative, expressed                                           | 1.87 | up   | 1.27 | down | 14.81 | down | 1.41 | up   | 1.38 | down | 1.15 | up   | ABA |
| Os.50909.1.S1_at   | LOC_Os03g55120 | plastocyanin-like domain containing protein, putative, expressed                      | 1.08 | down | 1.12 | down | 5.04  | down | 1.02 | down | 1.66 | down | 2.05 | down | 2   |
| Os.50909.2.S1_s_at | LOC_Os03g55120 | plastocyanin-like domain containing protein, putative, expressed                      | 1.05 | up   | 1.20 | down | 3.44  | down | 1.09 | up   | 1.44 | down | 1.59 | down | ABA |
| Os.50911.1.S1_at   | LOC_Os08g44750 | auxin-induced protein 5NG4, putative, expressed                                       | 1.26 | up   | 1.11 | down | 3.34  | down | 1.04 | up   | 1.08 | up   | 1.00 | up   | ABA |
| Os.50911.1.S1_at   | LOC_Os05g32150 | expressed protein                                                                     | 1.66 | down | 1.75 | up   | 1.08  | down | 6.85 | up   | 1.07 | down | 1.08 | down | ACC |
| Os.50916.1.S1_at   | LOC_Os11g04350 | cell death associated protein, putative, expressed                                    | 1.61 | down | 1.25 | up   | 12.66 | down | 1.26 | down | 1.52 | down | 1.92 | down | ABA |
| Os.50919.1.S1_at   | LOC_Os11g03580 | expressed protein                                                                     | 2.31 | up   | 1.52 | down | 2.05  | down | 1.14 | up   | 1.23 | down | 1.34 | down | 2   |
| Os.50922.1.S1_at   | LOC_Os09g27890 | lysM domain-containing GPI-anchored protein precursor, putative, expressed            | 1.25 | down | 1.15 | down | 2.92  | down | 1.07 | up   | 1.30 | down | 1.52 | down | ABA |
| Os.50939.1.S1_at   | LOC_Os01g67870 | expressed protein                                                                     | 1.16 | up   | 1.10 | up   | 2.44  | up   | 1.05 | down | 1.06 | up   | 1.27 | down | ABA |
| Os.50941.1.S1_at   | LOC_Os05g32680 | PAC, putative, expressed                                                              | 1.04 | down | 1.04 | up   | 2.97  | down | 1.20 | down | 1.47 | down | 1.41 | down | ABA |
| Os.5095.1.S1_at    | LOC_Os07g40130 | retrotransposon protein, putative, Ty3-gypsy subclass, expressed                      | 1.01 | up   | 1.13 | down | 2.02  | down | 1.10 | up   | 1.40 | down | 1.17 | up   | ABA |
| Os.50950.1.S1_x_at | LOC_Os02g44730 | tetracycline transporter protein, putative, expressed                                 | 1.05 | down | 1.94 | up   | 5.28  | up   | 1.14 | down | 1.54 | down | 3.69 | down | 2   |
| Os.50952.1.S1_at   | LOC_Os07g03120 | expressed protein                                                                     | 1.01 | down | 1.70 | down | 5.20  | up   | 1.18 | down | 1.14 | up   | 2.26 | up   | 2   |
| Os.50953.1.S1_at   | LOC_Os06g49970 | alpha-amylase precursor, putative, expressed                                          | 1.13 | down | 1.24 | down | 5.07  | up   | 1.01 | down | 1.07 | up   | 1.40 | down | ABA |
| Os.50955.1.S1_at   | AK059675       | Oryza sativa Japonica Group cDNA clone:001-031-G07, full insert sequence.             | 1.37 | down | 1.21 | down | 2.55  | up   | 1.01 | up   | 1.35 | up   | 1.04 | down | ABA |
| Os.50958.1.S1_at   | LOC_Os06g47820 | protein kinase domain containing protein, expressed                                   | 1.06 | up   | 1.00 | down | 4.76  | up   | 1.00 | up   | 1.01 | up   | 1.02 | down | ABA |
| Os.50970.1.S1_at   | LOC_Os03g32230 | ZOS3-12 - C2H2 zinc finger protein, expressed                                         | 1.09 | up   | 2.35 | up   | 1.02  | up   | 1.04 | up   | 1.04 | up   | 2.76 | up   | 2   |
| Os.50978.1.S1_at   | LOC_Os10g08026 | lecithin:cholesterol acyltransferase, putative, expressed                             | 1.56 | down | 1.65 | up   | 9.41  | down | 1.47 | up   | 1.97 | down | 1.70 | down | ABA |
| Os.50990.1.S1_at   | CT830381       | Oryza sativa (indica cultivar-group) cDNA clone:OSIGCSA027G08, full insert sequence   | 1.47 | down | 1.16 | down | 9.88  | down | 1.11 | down | 1.75 | down | 1.63 | up   | ABA |
| Os.5100.1.S1_s_at  | LOC_Os01g47635 | expressed protein                                                                     | 1.71 | down | 2.02 | up   | 10.47 | down | 1.35 | down | 3.60 | down | 7.28 | down | 4   |
| Os.51009.1.S1_x_at | AK100528       | DENN (AEX-3) domain-containing protein                                                | 1.00 | up   | 1.05 | down | 6.62  | up   | 2.21 | down | 1.68 | down | 2.47 | down | 3   |
| Os.51023.1.S1_at   | LOC_Os01g43851 | cytochrome P450 72A1, putative, expressed                                             | 1.36 | down | 1.44 | down | 4.15  | up   | 1.75 | down | 1.22 | up   | 1.09 | down | ABA |
| Os.51029.1.S1_at   | LOC_Os09g02770 | translation initiation factor IF-2, putative, expressed                               | 1.02 | down | 1.12 | up   | 4.79  | up   | 1.01 | up   | 1.59 | up   | 1.06 | up   | ABA |
| Os.51035.1.S1_at   | LOC_Os12g12260 | diacylglycerol kinase 1, putative, expressed                                          | 1.01 | down | 1.10 | down | 2.86  | up   | 1.06 | down | 1.04 | up   | 1.35 | up   | ABA |
| Os.51053.1.S1_at   | LOC_Os11g27400 | glycosyl hydrolase, putative, expressed                                               | 1.12 | up   | 1.20 | down | 3.56  | down | 1.21 | down | 1.28 | down | 1.02 | down | ABA |
| Os.51063.1.S1_at   | LOC_Os09g28210 | bHelix-loop-helix transcription factor, putative, expressed                           | 2.13 | up   | 2.21 | up   | 1.96  | up   | 1.44 | down | 1.30 | down | 2.37 | down | 4   |
| Os.51071.1.A1_x_at | LOC_Os12g44100 | peptide transporter PTR2, putative, expressed                                         | 1.08 | down | 1.03 | down | 2.54  | up   | 1.00 | down | 1.26 | up   | 1.11 | up   | ABA |
| Os.51080.1.S1_at   | LOC_Os05g19150 | hydrolase, alpha/beta fold family domain containing protein, expressed                | 1.06 | up   | 1.25 | down | 1.97  | down | 1.04 | up   | 1.66 | down | 2.49 | up   | JA  |
| Os.51088.1.S1_at   | LOC_Os04g05050 | pectate lyase precursor, putative, expressed                                          | 1.00 | down | 1.31 | down | 3.46  | down | 1.30 | down | 1.31 | down | 1.73 | up   | ABA |
| Os.51088.1.S1_x_at | LOC_Os08g43170 | hydroxymethylglutaryl-CoA synthase, putative, expressed                               | 1.19 | up   | 1.18 | down | 2.31  | up   | 1.05 | up   | 1.32 | up   | 1.27 | up   | ABA |
| Os.51091.1.S1_at   | LOC_Os03g19670 | GDSL-like lipase/acylhydrolase, putative, expressed                                   | 1.04 | up   | 1.82 | up   | 5.06  | down | 1.15 | up   | 1.15 | down | 1.26 | down | ABA |
| Os.51106.1.S1_at   | LOC_Os06g14540 | endoglucanase, putative, expressed                                                    | 1.14 | up   | 1.06 | down | 2.56  | down | 1.40 | down | 1.53 | down | 1.23 | down | ABA |
| Os.51110.1.S1_at   | AK060697       | Oryza sativa (japonica cultivar-group) Os04g0687200 (Os04g0687200) mRNA, complete cds | 1.06 | down | 1.02 | up   | 2.38  | down | 1.00 | up   | 1.50 | down | 1.44 | down | ABA |
| Os.51112.1.S1_at   | LOC_Os03g50860 | histidine kinase, putative, expressed                                                 | 1.08 | up   | 2.20 | up   | 5.98  | down | 1.01 | down | 1.74 | down | 1.48 | down | 2   |
| Os.51115.1.S1_x_at | AK060839       | Ras-related GTP-binding protein, putative                                             | 1.11 | down | 1.10 | down | 2.56  | up   | 1.03 | down | 1.26 | up   | 1.89 | down | ABA |
| Os.51117.1.S1_at   | AK060942       | Oryza sativa Japonica Group cDNA clone:006-201-D03, full insert sequence.             | 1.12 | up   | 1.00 | down | 1.24  | down | 1.42 | down | 1.64 | down | 2.19 | down | JA  |
| Os.5112.1.S1_at    | LOC_Os04g57810 | GA18008-PA, putative, expressed                                                       | 1.44 | up   | 1.04 | down | 2.33  | up   | 1.20 | up   | 2.57 | up   | 1.42 | up   | 3   |

|                    |                |                                                                                       |      |      |      |      |       |      |      |      |      |      |       |      |     |
|--------------------|----------------|---------------------------------------------------------------------------------------|------|------|------|------|-------|------|------|------|------|------|-------|------|-----|
| Os.51120.1.S1_at   | LOC_Os02g56600 | no apical meristem protein, putative, expressed                                       | 1.07 | down | 2.18 | up   | 4.88  | up   | 1.04 | up   | 1.44 | down | 1.08  | up   | 2   |
| Os.51127.1.S1_a_at | LOC_Os04g37820 | cytokinin-O-glucosyltransferase 2, putative, expressed                                | 1.12 | up   | 1.27 | up   | 3.14  | down | 1.74 | up   | 1.25 | down | 1.92  | up   | ABA |
| Os.51142.1.S1_at   | LOC_Os04g46660 | cyclin, putative, expressed                                                           | 1.09 | down | 1.13 | up   | 1.02  | down | 2.08 | down | 2.08 | down | 1.41  | down | 2   |
| Os.51144.1.S1_at   | LOC_Os07g47210 | GDSL-like lipase/acylhydrolase, putative, expressed                                   | 1.07 | up   | 1.10 | up   | 3.94  | up   | 2.19 | down | 1.18 | down | 1.45  | down | 2   |
| Os.51147.1.S1_at   | LOC_Os03g16960 | cysteine-rich repeat secretory protein 55 precursor, putative, expressed              | 1.21 | down | 1.15 | up   | 5.55  | down | 1.79 | up   | 2.26 | up   | 2.02  | up   | 3   |
| Os.51152.1.S1_at   | LOC_Os03g18680 | membrane associated DUF588 domain containing protein, putative, expressed             | 1.22 | up   | 1.31 | down | 4.94  | up   | 1.10 | down | 1.31 | up   | 1.14  | down | ABA |
| Os.5117.1.S1_at    | AK111124       | Oryza sativa Japonica Group cDNA clone:002-176-C05, full insert sequence.             | 1.37 | down | 1.22 | up   | 7.24  | up   | 1.15 | down | 1.11 | up   | 2.53  | up   | 2   |
| Os.51174.1.S1_at   | LOC_Os03g13570 | glycosyl hydrolases family 16, putative, expressed                                    | 1.26 | up   | 1.16 | down | 2.25  | down | 1.06 | up   | 1.02 | up   | 1.41  | down | ABA |
| Os.51176.1.S1_at   | LOC_Os10g31320 | retrotransposon protein, putative, unclassified, expressed                            | 1.08 | up   | 1.26 | down | 3.67  | up   | 1.04 | down | 1.18 | up   | 2.00  | up   | 2   |
| Os.51184.1.S1_at   | LOC_Os05g10370 | acid phosphatase, putative, expressed                                                 | 1.86 | down | 1.12 | up   | 8.73  | down | 1.48 | down | 1.52 | down | 2.36  | up   | 2   |
| Os.51206.1.S1_at   | LOC_Os04g49620 | DUF581 domain containing protein, expressed                                           | 1.56 | up   | 1.62 | up   | 2.51  | down | 1.89 | down | 1.87 | down | 1.75  | down | ABA |
| Os.51212.1.S1_at   | LOC_Os04g42800 | photosystem-II repair protein, putative, expressed                                    | 1.24 | up   | 1.21 | down | 4.33  | down | 1.06 | down | 1.47 | down | 1.14  | down | ABA |
| Os.51213.1.S1_at   | LOC_Os03g18370 | MRH1, putative, expressed                                                             | 1.17 | up   | 1.11 | down | 3.07  | down | 1.18 | down | 1.41 | down | 1.16  | down | ABA |
| Os.51223.1.S1_at   | LOC_Os04g57690 | expressed protein                                                                     | 1.30 | up   | 1.15 | up   | 2.11  | up   | 1.06 | down | 1.28 | up   | 1.12  | down | ABA |
| Os.51228.2.A1_at   | LOC_Os03g14120 | dihydrodipicolinate reductase, putative, expressed                                    | 1.02 | up   | 1.34 | down | 5.55  | down | 2.11 | down | 1.50 | down | 1.44  | down | 2   |
| Os.51228.3.S1_at   | LOC_Os03g14120 | dihydrodipicolinate reductase, putative, expressed                                    | 1.68 | down | 1.08 | down | 3.19  | down | 1.05 | down | 1.44 | down | 1.33  | down | ABA |
| Os.51228.3.S1_x_at | LOC_Os03g14120 | dihydrodipicolinate reductase, putative, expressed                                    | 1.05 | down | 1.01 | up   | 2.59  | down | 1.05 | up   | 1.26 | down | 1.02  | down | ABA |
| Os.5124.1.S1_at    | LOC_Os05g49770 | CTP synthase, putative, expressed                                                     | 3.21 | up   | 1.90 | up   | 3.87  | up   | 1.10 | down | 1.73 | up   | 1.39  | down | 2   |
| Os.5124.1.S1_s_at  | LOC_Os05g49770 | CTP synthase, putative, expressed                                                     | 2.50 | up   | 1.68 | up   | 3.34  | up   | 1.15 | down | 1.42 | up   | 1.74  | down | 2   |
| Os.51245.1.S1_at   | LOC_Os02g32450 | expressed protein                                                                     | 1.26 | up   | 1.34 | down | 4.13  | up   | 1.15 | down | 1.82 | up   | 1.14  | down | ABA |
| Os.51258.1.S1_at   | LOC_Os02g03250 | expressed protein                                                                     | 1.05 | down | 1.10 | up   | 2.10  | down | 1.17 | down | 1.42 | down | 1.26  | down | ABA |
| Os.51260.1.S1_at   | LOC_Os04g47840 | expressed protein                                                                     | 1.12 | up   | 1.57 | down | 3.23  | down | 1.29 | down | 1.18 | down | 1.02  | down | ABA |
| Os.51262.1.S1_at   | LOC_Os03g45760 | expressed protein                                                                     | 1.07 | down | 1.17 | down | 3.61  | down | 1.38 | down | 1.91 | down | 1.22  | down | ABA |
| Os.5127.1.S1_x_at  | LOC_Os07g46220 | SNARE associated Golgi protein, putative, expressed                                   | 1.07 | up   | 1.01 | down | 2.21  | up   | 1.02 | down | 1.04 | up   | 1.21  | up   | ABA |
| Os.51270.1.S1_at   | LOC_Os02g54180 | expressed protein                                                                     | 4.08 | down | 1.59 | down | 18.20 | down | 1.37 | up   | 1.08 | up   | 4.44  | down | 3   |
| Os.51285.1.S1_at   | LOC_Os01g04390 | expressed protein                                                                     | 1.22 | up   | 2.17 | up   | 3.11  | down | 1.29 | down | 1.54 | down | 2.06  | down | 3   |
| Os.51291.1.S1_at   | NM_001052917   | Oryza sativa (japonica cultivar-group) Os02g0234700 (Os02g0234700) mRNA, complete cds | 1.54 | down | 1.08 | down | 4.32  | down | 1.80 | down | 1.60 | down | 1.40  | down | ABA |
| Os.51295.1.S1_at   | AK062450       | Oryza sativa Japonica Group cDNA clone:001-103-C02, full insert sequence.             | 1.61 | up   | 1.37 | up   | 2.39  | up   | 1.15 | down | 1.02 | down | 1.43  | down | ABA |
| Os.51299.1.S1_at   | LOC_Os05g38880 | expressed protein                                                                     | 5.18 | up   | 1.41 | down | 3.10  | down | 1.52 | down | 1.18 | up   | 1.03  | down | 2   |
| Os.5130.1.S1_at    | LOC_Os04g34630 | peroxidase precursor, putative, expressed                                             | 1.07 | down | 1.15 | down | 3.21  | up   | 1.14 | up   | 1.02 | down | 1.03  | up   | ABA |
| Os.51300.1.S1_x_at | LOC_Os02g10500 | expressed protein                                                                     | 1.18 | down | 1.08 | down | 2.11  | down | 1.40 | down | 1.01 | down | 1.08  | down | ABA |
| Os.51337.1.S1_at   | LOC_Os06g39330 | UDP-glucuronosyl and UDP-glucosyl transferase domain containing protein, expressed    | 1.42 | up   | 1.82 | up   | 1.01  | up   | 1.20 | down | 2.56 | up   | 1.10  | up   | SA  |
| Os.51349.1.S1_at   | LOC_Os02g53870 | expressed protein                                                                     | 2.02 | up   | 1.11 | up   | 1.42  | up   | 2.99 | up   | 2.99 | up   | 3.89  | up   | 4   |
| Os.51369.1.S1_at   | LOC_Os02g51740 | VQ domain containing protein, putative, expressed                                     | 1.09 | down | 1.15 | down | 2.36  | up   | 1.05 | up   | 1.32 | up   | 1.19  | down | ABA |
| Os.51382.1.S1_at   | LOC_Os01g72470 | expressed protein                                                                     | 1.01 | up   | 1.32 | down | 1.20  | down | 1.07 | down | 1.00 | down | 5.05  | up   | JA  |
| Os.51389.1.S1_at   | LOC_Os11g02670 | zinc finger, C3HC4 type domain containing protein, expressed                          | 1.77 | down | 1.33 | down | 6.18  | down | 1.55 | down | 3.92 | down | 1.67  | up   | 2   |
| Os.51392.1.S1_at   | LOC_Os12g32970 | membrane associated DUF588 domain containing protein, putative, expressed             | 1.06 | up   | 1.09 | up   | 3.04  | up   | 1.12 | down | 1.20 | up   | 1.03  | down | ABA |
| Os.51394.1.S1_at   | LOC_Os05g07890 | embryo-specific 3, putative, expressed                                                | 1.05 | up   | 1.20 | up   | 16.42 | up   | 1.07 | down | 1.17 | up   | 1.06  | up   | ABA |
| Os.51401.1.S1_at   | NM_001068260   | Oryza sativa (japonica cultivar-group) Os08g0390700 (Os08g0390700) mRNA, partial cds  | 1.52 | down | 1.12 | down | 3.75  | down | 1.42 | up   | 1.55 | up   | 1.04  | down | ABA |
| Os.51413.1.S1_at   | NM_001072597   | Oryza sativa (japonica cultivar-group) Os12g0129300 (Os12g0129300) mRNA, complete cds | 1.10 | up   | 1.03 | up   | 3.35  | up   | 1.09 | up   | 1.10 | down | 1.03  | down | ABA |
| Os.51427.1.S1_at   | NM_001060644   | Oryza sativa (japonica cultivar-group) Os04g0653700 (Os04g0653700) mRNA, complete cds | 1.48 | down | 1.16 | up   | 1.82  | up   | 3.79 | up   | 7.71 | up   | 1.26  | up   | 2   |
| Os.51432.1.S1_at   | NM_001054893   | Oryza sativa (japonica cultivar-group) Os02g0791400 (Os02g0791400) mRNA, complete cds | 2.44 | down | 1.08 | down | 27.91 | down | 1.17 | up   | 4.47 | down | 6.69  | down | 4   |
| Os.51441.1.S1_at   | AK062818       | Oryza sativa Japonica Group cDNA clone:001-107-E10, full insert sequence.             | 1.02 | down | 1.01 | down | 2.16  | up   | 1.04 | down | 1.09 | up   | 1.01  | up   | ABA |
| Os.51451.1.S1_at   | LOC_Os07g41340 | B12D protein, putative, expressed                                                     | 5.43 | down | 1.01 | up   | 1.59  | up   | 1.72 | up   | 1.08 | up   | 1.24  | up   | IAA |
| Os.51460.1.S1_at   | LOC_Os02g33380 | pectinesterase inhibitor domain containing protein, putative, expressed               | 2.09 | up   | 1.18 | down | 22.89 | up   | 4.36 | down | 1.65 | up   | 1.14  | down | 3   |
| Os.51473.2.S1_x_at | LOC_Os05g48160 | 2Fe-2S iron-sulfur cluster binding domain containing protein, expressed               | 2.10 | up   | 1.22 | up   | 1.88  | up   | 1.13 | down | 1.41 | up   | 1.01  | down | IAA |
| Os.51479.1.S1_at   | LOC_Os09g25720 | glycine-rich cell wall structural protein 2 precursor, putative, expressed            | 1.97 | down | 1.01 | up   | 5.53  | down | 1.76 | up   | 1.17 | down | 1.13  | down | ABA |
| Os.51480.1.S1_at   | LOC_Os01g62980 | LTP101 - Protease inhibitor/seed storage/LTP family protein precursor, expressed      | 1.12 | down | 1.04 | up   | 13.78 | up   | 1.96 | down | 1.29 | down | 1.77  | down | ABA |
| Os.51480.1.S1_x_at | LOC_Os01g62980 | LTP101 - Protease inhibitor/seed storage/LTP family protein precursor, expressed      | 1.08 | down | 1.06 | up   | 17.93 | up   | 1.75 | down | 1.24 | up   | 2.19  | down | 2   |
| Os.5152.1.S1_at    | LOC_Os11g05400 | Ser/Thr protein phosphatase family protein, putative, expressed                       | 1.01 | up   | 1.01 | down | 6.40  | up   | 1.13 | up   | 1.45 | up   | 1.03  | up   | ABA |
| Os.51521.1.S1_at   | AK063001       | Oryza sativa Japonica Group cDNA clone:001-109-H04, full insert sequence.             | 1.05 | up   | 1.12 | down | 3.66  | up   | 1.06 | down | 1.02 | up   | 1.01  | down | ABA |
| Os.51521.1.S2_at   | AK106303       | Oryza sativa Japonica Group cDNA clone:002-101-C07, full insert sequence.             | 1.06 | down | 1.03 | down | 3.01  | up   | 1.61 | down | 1.02 | down | 1.49  | down | ABA |
| Os.51525.1.S1_at   | LOC_Os03g20900 | Myb transcription factor, putative, expressed                                         | 1.17 | up   | 1.18 | down | 2.83  | down | 1.01 | up   | 1.02 | up   | 1.46  | down | ABA |
| Os.5154.1.S1_at    | LOC_Os07g49080 | COBRA-like protein 7 precursor, putative, expressed                                   | 1.08 | up   | 1.25 | up   | 3.19  | down | 1.32 | up   | 1.10 | up   | 1.53  | down | ABA |
| Os.51546.1.S1_at   | LOC_Os03g08520 | DUF581 domain containing protein, expressed                                           | 2.09 | down | 1.05 | up   | 25.71 | down | 1.13 | down | 1.56 | down | 14.21 | up   | 3   |

|                    |                |                                                                                         |       |      |      |      |       |      |      |      |       |      |      |      |     |
|--------------------|----------------|-----------------------------------------------------------------------------------------|-------|------|------|------|-------|------|------|------|-------|------|------|------|-----|
| Os.51550.1.S1_at   | LOC_Os05g25784 | expressed protein                                                                       | 2.59  | up   | 1.34 | down | 5.75  | up   | 1.25 | down | 1.88  | up   | 1.10 | down | 2   |
| Os.51558.2.S1_at   | LOC_Os01g59840 | Os1bglu3 - beta-glucosidase homologue, similar to G. max isohydroxyurate hydrolase,     | 1.24  | up   | 1.16 | up   | 3.01  | down | 1.24 | up   | 1.67  | down | 1.17 | down | ABA |
| Os.51566.1.S1_s_at | LOC_Os03g53080 | zinc finger, C3HC4 type domain containing protein, expressed                            | 1.34  | up   | 1.16 | up   | 2.34  | up   | 1.00 | up   | 1.39  | up   | 1.02 | up   | ABA |
| Os.51562.1.S1_at   | LOC_Os04g36770 | PME/invertase inhibitor, putative, expressed                                            | 1.17  | down | 2.05 | up   | 1.91  | down | 1.24 | up   | 2.09  | down | 1.30 | down | 2   |
| Os.51564.1.S1_s_at | LOC_Os04g35070 | expressed protein                                                                       | 1.28  | down | 1.27 | down | 2.34  | up   | 1.27 | up   | 1.03  | down | 1.10 | down | ABA |
| Os.51574.1.S1_at   | LOC_Os04g56390 | expressed protein                                                                       | 16.82 | up   | 1.39 | down | 2.80  | down | 1.82 | down | 1.03  | up   | 1.68 | down | 2   |
| Os.51578.1.S1_x_at | LOC_Os06g37020 | expressed protein                                                                       | 1.34  | down | 1.10 | down | 3.30  | down | 1.06 | down | 1.79  | up   | 1.06 | up   | ABA |
| Os.51586.1.S1_at   | LOC_Os06g12660 | NHL repeat-containing protein, putative, expressed                                      | 1.10  | up   | 1.51 | up   | 3.92  | down | 1.13 | up   | 1.12  | down | 1.15 | down | ABA |
| Os.51595.1.S1_at   | LOC_Os01g46370 | lipase class 3 family protein, putative, expressed                                      | 1.02  | down | 1.14 | up   | 3.56  | up   | 1.13 | down | 1.11  | up   | 1.89 | down | ABA |
| Os.51597.1.S1_at   | LOC_Os01g68598 | expressed protein                                                                       | 1.03  | down | 1.05 | up   | 3.68  | down | 1.37 | down | 1.60  | down | 1.51 | down | ABA |
| Os.51599.1.S1_at   | LOC_Os09g19820 | aminopeptidase, putative, expressed                                                     | 3.64  | up   | 2.28 | up   | 7.33  | up   | 2.60 | up   | 44.24 | up   | 9.66 | up   | 6   |
| Os.5160.1.S1_at    | LOC_Os07g46330 | uncharacterized UPF0114 domain containing protein, expressed                            | 1.17  | down | 1.03 | up   | 3.44  | down | 1.03 | up   | 1.75  | down | 1.09 | up   | ABA |
| Os.51601.1.S1_at   | LOC_Os07g40300 | ZOS7-10 - C2H2 zinc finger protein, expressed                                           | 1.25  | up   | 2.55 | down | 2.23  | up   | 1.05 | down | 1.03  | up   | 1.68 | down | 2   |
| Os.51606.1.S1_at   | AK063156       | Oryza sativa Japonica Group cDNA clone:001-111-H12, full insert sequence.               | 1.01  | down | 1.16 | up   | 9.51  | up   | 1.57 | up   | 2.18  | up   | 1.30 | up   | 2   |
| Os.51638.1.S1_s_at | LOC_Os09g26310 | hypro1, putative, expressed                                                             | 1.02  | down | 1.25 | down | 5.93  | up   | 1.06 | up   | 1.53  | up   | 1.74 | up   | ABA |
| Os.51639.1.S1_x_at | LOC_Os10g38040 | lysM domain containing protein, putative, expressed                                     | 1.02  | up   | 1.41 | up   | 3.02  | up   | 1.38 | up   | 3.05  | up   | 2.53 | up   | 3   |
| Os.5164.1.S1_at    | LOC_Os10g25030 | red chlorophyll catabolite reductase, putative, expressed                               | 1.06  | down | 1.08 | down | 3.34  | up   | 1.01 | up   | 1.22  | up   | 1.03 | down | ABA |
| Os.51648.1.S1_at   | LOC_Os03g20910 | homeobox domain containing protein, expressed                                           | 12.75 | up   | 2.17 | down | 1.49  | up   | 2.04 | up   | 1.93  | up   | 1.99 | up   | 4   |
| Os.51652.1.S1_at   | LOC_Os05g49040 | expressed protein                                                                       | 1.27  | down | 1.36 | up   | 2.43  | down | 1.15 | down | 1.35  | down | 1.51 | down | ABA |
| Os.51655.1.S1_at   | LOC_Os08g40720 | FAD-binding and arabino-lactone oxidase domains containing protein, putative, expressed | 1.02  | down | 1.10 | up   | 1.03  | down | 2.67 | down | 3.53  | down | 1.37 | down | 2   |
| Os.51655.2.S1_x_at | LOC_Os08g40720 | FAD-binding and arabino-lactone oxidase domains containing protein, putative, expressed | 1.07  | up   | 1.21 | up   | 1.02  | up   | 2.42 | down | 2.95  | down | 1.41 | down | 2   |
| Os.51658.1.S1_at   | LOC_Os06g49340 | OsFBDUF35 - F-box and DUF domain containing protein, expressed                          | 1.56  | up   | 3.89 | up   | 3.62  | up   | 2.37 | up   | 2.07  | up   | 1.24 | up   | 4   |
| Os.51663.1.S1_at   | LOC_Os04g50760 | ara54-like RING finger protein, putative, expressed                                     | 1.06  | down | 1.07 | down | 2.68  | up   | 1.02 | down | 1.34  | up   | 1.10 | down | ABA |
| Os.51664.1.S1_at   | LOC_Os06g11720 | cytokinin-O-glucosyltransferase 2, putative, expressed                                  | 1.06  | up   | 4.91 | up   | 4.22  | down | 1.52 | up   | 2.01  | up   | 1.88 | up   | 3   |
| Os.51665.1.A1_at   | AK063327       | Oryza sativa Japonica Group cDNA clone:001-113-H08, full insert sequence.               | 1.11  | up   | 1.02 | down | 3.21  | up   | 1.01 | up   | 1.01  | down | 1.00 | down | ABA |
| Os.51696.1.S1_at   | LOC_Os02g43620 | transporter, major facilitator family, putative, expressed                              | 1.03  | up   | 1.05 | up   | 25.73 | up   | 1.00 | up   | 1.01  | up   | 1.00 | up   | ABA |
| Os.51706.1.S1_at   | LOC_Os03g58910 | expressed protein                                                                       | 1.00  | down | 1.03 | down | 3.99  | up   | 1.01 | up   | 1.06  | up   | 1.02 | up   | ABA |
| Os.51709.2.S1_at   | LOC_Os04g49700 | zinc finger, C3HC4 type domain containing protein, expressed                            | 1.16  | down | 1.04 | up   | 2.66  | up   | 1.05 | up   | 1.25  | up   | 1.24 | down | ABA |
| Os.51711.1.S1_at   | AK063499       | Oryza sativa Japonica Group cDNA clone:001-116-E02, full insert sequence.               | 1.00  | down | 1.01 | up   | 4.87  | up   | 1.02 | down | 1.02  | down | 1.02 | up   | ABA |
| Os.51714.1.S1_at   | LOC_Os07g48560 | homeobox domain containing protein, expressed                                           | 3.39  | up   | 2.93 | down | 1.01  | up   | 1.86 | up   | 3.92  | up   | 3.44 | up   | 4   |
| Os.51718.1.S1_at   | LOC_Os11g26780 | dehydrin, putative, expressed                                                           | 1.01  | up   | 1.85 | up   | 86.95 | up   | 1.29 | down | 1.32  | up   | 1.47 | up   | ABA |
| Os.51731.1.S1_at   | LOC_Os12g40780 | ankyrin repeat domain-containing protein 44, putative, expressed                        | 1.19  | down | 1.18 | down | 6.24  | up   | 1.06 | up   | 1.01  | down | 1.03 | up   | ABA |
| Os.51736.1.S1_at   | AK063566       | Oryza sativa Japonica Group cDNA clone:001-117-F09, full insert sequence.               | 2.83  | up   | 1.09 | down | 1.01  | up   | 1.00 | down | 1.02  | down | 1.01 | down | IAA |
| Os.51737.1.S1_x_at | LOC_Os12g32970 | membrane associated DUF588 domain containing protein, putative, expressed               | 1.28  | down | 1.17 | down | 4.56  | up   | 1.23 | down | 2.05  | up   | 1.21 | down | 2   |
| Os.5174.1.S1_at    | LOC_Os01g67530 | AMP-binding enzyme, putative, expressed                                                 | 1.22  | down | 1.27 | down | 3.09  | down | 1.04 | down | 1.15  | down | 1.16 | up   | ABA |
| Os.51741.1.S1_at   | LOC_Os05g25920 | expressed protein                                                                       | 2.19  | up   | 2.10 | up   | 1.98  | up   | 1.13 | up   | 1.11  | down | 1.04 | down | 2   |
| Os.51746.1.S1_s_at | LOC_Os05g50110 | oleosin, putative, expressed                                                            | 1.04  | up   | 1.25 | down | 47.38 | up   | 1.00 | up   | 1.08  | down | 1.06 | down | ABA |
| Os.51753.1.A1_at   | LOC_Os12g35340 | OsGrx_C11 - glutaredoxin subgroup III, expressed                                        | 1.71  | down | 1.86 | up   | 11.93 | down | 1.15 | up   | 7.61  | down | 1.62 | down | 2   |
| Os.51758.2.S1_at   | LOC_Os07g47840 | expressed protein                                                                       | 1.01  | down | 1.00 | up   | 10.20 | up   | 1.00 | up   | 1.00  | down | 1.01 | up   | ABA |
| Os.51763.1.S1_x_at | LOC_Os01g12690 | plant-specific domain TIGR01568 family protein, expressed                               | 1.38  | up   | 1.16 | up   | 14.79 | up   | 1.36 | up   | 1.30  | up   | 1.20 | up   | ABA |
| Os.51774.1.S1_at   | AK063676       | Oryza sativa Japonica Group cDNA clone:001-119-E01, full insert sequence.               | 1.85  | up   | 1.07 | up   | 1.07  | up   | 1.04 | up   | 1.28  | down | 2.49 | down | JA  |
| Os.51775.1.S1_at   | LOC_Os12g05210 | expressed protein                                                                       | 1.13  | up   | 1.03 | up   | 46.95 | up   | 1.07 | down | 4.44  | up   | 1.02 | up   | 2   |
| Os.51775.1.S1_x_at | LOC_Os12g05210 | expressed protein                                                                       | 1.29  | up   | 1.01 | down | 81.22 | up   | 1.02 | up   | 4.05  | up   | 1.17 | up   | 2   |
| Os.5178.1.A1_s_at  | LOC_Os03g56950 | phytochrome-interacting factor 4, putative, expressed                                   | 1.03  | up   | 1.98 | up   | 12.55 | down | 1.73 | down | 2.35  | down | 2.19 | down | 4   |
| Os.51787.1.S1_at   | LOC_Os12g24320 | ATPase 3, putative, expressed                                                           | 2.36  | down | 1.12 | up   | 2.76  | down | 1.29 | down | 1.43  | down | 1.81 | down | 2   |
| Os.51789.1.S1_at   | LOC_Os03g42520 | expressed protein                                                                       | 1.11  | down | 1.33 | down | 49.12 | up   | 1.04 | down | 1.08  | down | 1.02 | down | ABA |
| Os.5179.1.A1_at    | LOC_Os08g36310 | cytochrome P450, putative, expressed                                                    | 1.33  | down | 1.22 | down | 2.03  | down | 1.34 | up   | 1.45  | down | 2.03 | down | 2   |
| Os.51794.1.S1_at   | LOC_Os06g12370 | OsFtsH6 FtsH protease, homologue of AtFtsH6, expressed                                  | 1.05  | up   | 1.14 | down | 4.51  | up   | 1.06 | down | 1.06  | down | 1.05 | down | ABA |
| Os.51807.1.S1_at   | AK063793       | Oryza sativa Japonica Group cDNA clone:001-121-E12, full insert sequence.               | 1.32  | up   | 1.18 | down | 19.78 | up   | 1.58 | down | 1.30  | up   | 1.58 | down | ABA |
| Os.51831.1.S1_at   | LOC_Os02g15340 | no apical meristem protein, putative, expressed                                         | 2.50  | up   | 1.21 | down | 2.81  | down | 1.07 | down | 1.05  | up   | 1.13 | down | 2   |
| Os.51833.1.S1_x_at | LOC_Os07g09050 | exostosin family protein, putative, expressed                                           | 1.02  | down | 1.00 | up   | 21.93 | up   | 1.01 | down | 1.09  | up   | 1.01 | up   | ABA |
| Os.51835.1.S1_a_at | LOC_Os05g48700 | gibberellin 2-beta-dioxygenase, putative, expressed                                     | 1.91  | up   | 2.58 | down | 36.59 | up   | 1.22 | up   | 3.49  | up   | 1.90 | up   | 3   |
| Os.51847.1.S1_x_at | LOC_Os03g55220 | bHelix-loop-helix transcription factor, putative, expressed                             | 1.18  | up   | 1.10 | up   | 3.05  | down | 1.48 | up   | 1.77  | up   | 1.72 | up   | ABA |
| Os.51847.2.S1_at   | LOC_Os03g55220 | bHelix-loop-helix transcription factor, putative, expressed                             | 1.75  | up   | 1.23 | up   | 14.60 | down | 1.19 | up   | 1.81  | up   | 1.53 | up   | ABA |
| Os.5185.1.S1_at    | LOC_Os07g48390 | proline-rich protein, putative, expressed                                               | 1.50  | down | 1.41 | down | 3.58  | down | 2.22 | up   | 1.02  | up   | 1.24 | up   | 2   |

|                    |                |                                                                                     |       |      |      |      |        |      |      |      |      |      |       |      |     |
|--------------------|----------------|-------------------------------------------------------------------------------------|-------|------|------|------|--------|------|------|------|------|------|-------|------|-----|
| Os.51853.1.S1_at   | LOC_Os06g28480 | polygalacturonase inhibitor 1 precursor, putative, expressed                        | 1.04  | down | 1.13 | down | 2.46   | down | 1.27 | down | 1.46 | down | 1.48  | down | ABA |
| Os.5186.1.S1_at    | LOC_Os04g33390 | prephenate dehydratase domain containing protein, expressed                         | 1.21  | down | 1.43 | up   | 2.65   | down | 1.19 | up   | 1.26 | down | 1.84  | up   | ABA |
| Os.519.1.S1_at     | LOC_Os01g08860 | hsp20/alpha crystallin family protein, putative, expressed                          | 1.46  | down | 1.44 | down | 3.04   | up   | 1.05 | up   | 9.19 | up   | 1.21  | down | 2   |
| Os.51916.1.S1_at   | LOC_Os01g39020 | HSF-type DNA-binding domain containing protein, expressed                           | 1.55  | up   | 1.01 | down | 120.32 | up   | 1.07 | down | 5.30 | up   | 2.19  | up   | 3   |
| Os.51923.1.S1_at   | CT831749       | Oryza sativa (indica cultivar-group) cDNA clone:OSIGCRA123F16, full insert sequence | 1.27  | down | 2.79 | up   | 7.61   | up   | 1.25 | up   | 2.20 | up   | 61.74 | up   | 4   |
| Os.51924.1.S1_at   | AK064290       | Oryza sativa Japonica Group cDNA clone:002-105-H05, full insert sequence.           | 1.19  | up   | 1.01 | up   | 3.13   | up   | 1.14 | down | 1.06 | up   | 1.27  | up   | ABA |
| Os.51926.1.S1_at   | AK064292       | no apical meristem (NAM) family protein                                             | 2.25  | up   | 1.33 | down | 2.65   | up   | 1.19 | down | 1.49 | up   | 1.13  | up   | 2   |
| Os.51926.1.S1_x_at | AK064292       | no apical meristem (NAM) family protein                                             | 1.61  | up   | 1.54 | down | 2.97   | up   | 1.13 | down | 1.63 | up   | 1.32  | up   | ABA |
| Os.51934.1.S1_at   | LOC_Os02g03600 | dnaJ domain containing protein, expressed                                           | 1.12  | up   | 1.00 | up   | 2.26   | up   | 1.27 | down | 1.39 | up   | 1.01  | up   | ABA |
| Os.51935.1.S1_at   | LOC_Os11g01830 | staphylococcal nuclease homologue, putative, expressed                              | 1.84  | down | 1.43 | down | 5.86   | down | 1.04 | up   | 1.60 | down | 2.20  | down | 2   |
| Os.51937.1.S1_a_at | LOC_Os07g09670 | galactosyltransferase family protein, putative, expressed                           | 1.19  | down | 1.09 | down | 2.76   | up   | 1.14 | up   | 1.06 | up   | 1.28  | up   | ABA |
| Os.5194.1.S1_x_at  | LOC_Os01g66110 | methyltransferase, putative, expressed                                              | 1.41  | up   | 1.05 | down | 2.31   | down | 1.04 | up   | 1.08 | down | 1.16  | up   | ABA |
| Os.5194.2.S1_at    | LOC_Os01g66110 | methyltransferase, putative, expressed                                              | 1.00  | up   | 1.09 | down | 2.20   | down | 1.11 | up   | 1.01 | down | 1.10  | up   | ABA |
| Os.5195.1.S1_at    | LOC_Os01g66240 | mitochondrion protein, putative, expressed                                          | 1.20  | up   | 1.03 | up   | 3.02   | up   | 1.24 | up   | 1.56 | up   | 1.61  | up   | ABA |
| Os.51950.1.S1_at   | LOC_Os05g38830 | HECT-domain domain containing protein, expressed                                    | 1.10  | up   | 1.09 | down | 3.09   | up   | 1.11 | up   | 1.77 | down | 1.16  | down | ABA |
| Os.51956.1.S1_at   | LOC_Os02g52830 | lipase, putative, expressed                                                         | 1.54  | down | 1.40 | down | 5.41   | up   | 1.87 | up   | 1.31 | up   | 1.04  | up   | ABA |
| Os.51968.1.S1_a_at | LOC_Os05g15040 | NB-ARC domain containing protein, expressed                                         | 1.17  | down | 1.18 | down | 2.11   | down | 1.03 | down | 1.83 | down | 1.40  | down | ABA |
| Os.51975.1.S1_x_at | LOC_Os05g31056 | tetratricopeptide repeat containing protein, putative, expressed                    | 1.04  | down | 1.13 | down | 2.03   | up   | 1.18 | up   | 1.16 | up   | 1.01  | down | ABA |
| Os.51983.1.A1_x_at | LOC_Os01g12470 | mitochondrial carrier protein, putative, expressed                                  | 1.07  | up   | 1.08 | down | 6.31   | up   | 1.05 | up   | 1.64 | up   | 1.29  | up   | ABA |
| Os.52000.1.S1_at   | LOC_Os12g13950 | POLA2 - Putative DNA polymerase alpha complex subunit, expressed                    | 1.35  | down | 1.05 | up   | 4.97   | down | 1.18 | down | 1.66 | down | 1.64  | down | ABA |
| Os.52001.1.S2_at   | LOC_Os05g01040 | serine/threonine-protein kinase, putative, expressed                                | 1.21  | up   | 1.03 | down | 1.37   | up   | 1.53 | up   | 1.68 | up   | 2.50  | up   | JA  |
| Os.52005.1.S1_at   | LOC_Os02g54254 | saccharopine dehydrogenase, putative, expressed                                     | 1.15  | down | 1.13 | down | 4.10   | up   | 1.12 | up   | 1.83 | up   | 1.32  | up   | ABA |
| Os.52036.1.S1_at   | LOC_Os05g31020 | eukaryotic peptide chain release factor subunit 1-1, putative, expressed            | 1.58  | up   | 1.11 | down | 99.59  | up   | 1.11 | down | 1.12 | down | 1.31  | up   | ABA |
| Os.52056.1.S1_at   | LOC_Os01g43080 | exonuclease, putative, expressed                                                    | 1.21  | down | 1.26 | down | 4.75   | up   | 1.20 | up   | 1.47 | up   | 1.45  | up   | ABA |
| Os.5208.1.S1_at    | LOC_Os06g36050 | expressed protein                                                                   | 1.06  | up   | 1.10 | down | 3.28   | down | 1.01 | down | 1.45 | down | 1.04  | up   | ABA |
| Os.5209.2.S1_at    | LOC_Os09g34320 | expressed protein                                                                   | 1.23  | down | 2.30 | up   | 2.68   | down | 1.73 | down | 1.87 | down | 1.55  | down | 2   |
| Os.52091.1.S1_at   | LOC_Os10g40290 | pectinacetyltransferase domain containing protein, expressed                        | 1.17  | up   | 1.15 | down | 5.22   | down | 1.66 | down | 1.71 | down | 1.51  | down | ABA |
| Os.52095.2.S1_at   | LOC_Os09g32988 | POE18 - Pollen Ole e I allergen and extensin family protein precursor, expressed    | 1.14  | down | 1.32 | down | 4.67   | down | 1.07 | up   | 2.15 | down | 1.47  | down | 2   |
| Os.52099.1.S1_at   | LOC_Os06g03059 | hypothetical protein                                                                | 1.17  | down | 1.50 | down | 2.36   | down | 1.93 | down | 1.70 | up   | 4.11  | up   | 2   |
| Os.5210.1.S1_at    | LOC_Os09g39370 | citrate transporter, putative, expressed                                            | 1.35  | up   | 1.04 | down | 9.91   | up   | 1.23 | up   | 1.89 | up   | 1.30  | down | ABA |
| Os.52112.1.S1_at   | LOC_Os07g48320 | HAD superfamily phosphatase, putative, expressed                                    | 41.26 | up   | 2.71 | up   | 2.31   | down | 1.54 | up   | 1.19 | up   | 1.13  | down | 3   |
| Os.5213.1.S1_at    | LOC_Os02g44720 | expressed protein                                                                   | 1.17  | up   | 1.02 | down | 1.46   | up   | 1.15 | down | 1.03 | down | 2.71  | down | JA  |
| Os.52132.1.S2_at   | AK068321       | Oryza sativa Japonica Group cDNA clone:J013148K15, full insert sequence.            | 2.20  | down | 1.13 | down | 1.01   | up   | 1.01 | up   | 1.29 | up   | 1.00  | up   | IAA |
| Os.52136.1.S1_at   | LOC_Os03g59430 | uncharacterized glycosyltransferase, putative, expressed                            | 1.59  | down | 1.05 | down | 5.33   | up   | 1.43 | down | 1.10 | down | 1.15  | down | ABA |
| Os.52151.1.S1_at   | LOC_Os08g38460 | zinc finger, C3HC4 type domain containing protein, expressed                        | 1.23  | up   | 1.73 | up   | 4.44   | up   | 1.17 | down | 1.06 | down | 1.16  | down | ABA |
| Os.52154.1.S1_at   | LOC_Os05g25400 | RNA binding protein, putative, expressed                                            | 1.16  | up   | 1.08 | up   | 8.51   | down | 1.05 | down | 2.18 | down | 29.72 | down | 3   |
| Os.52156.1.S1_at   | LOC_Os11g20360 | expressed protein                                                                   | 1.45  | down | 1.37 | down | 2.38   | down | 1.06 | down | 1.06 | down | 1.14  | down | ABA |
| Os.52181.1.S1_at   | AK065487       | Oryza sativa Japonica Group cDNA clone:J013003I22, full insert sequence.            | 2.47  | down | 1.51 | up   | 1.23   | down | 1.22 | up   | 1.09 | up   | 1.16  | down | IAA |
| Os.52189.1.S1_at   | LOC_Os06g19260 | cadmium tolerance factor, putative, expressed                                       | 1.12  | down | 1.54 | down | 4.05   | down | 1.46 | up   | 1.83 | up   | 1.07  | down | ABA |
| Os.52193.1.S1_at   | LOC_Os12g24170 | beta-galactosidase precursor, putative, expressed                                   | 1.17  | up   | 1.04 | down | 2.61   | up   | 1.24 | up   | 1.30 | up   | 1.16  | up   | ABA |
| Os.52211.1.S1_at   | LOC_Os07g40870 | IgA FC receptor precursor, putative, expressed                                      | 1.06  | up   | 1.10 | up   | 2.26   | up   | 1.21 | down | 1.01 | down | 1.24  | down | ABA |
| Os.52234.1.S1_at   | LOC_Os02g02910 | expressed protein                                                                   | 1.16  | up   | 1.05 | up   | 7.56   | down | 1.55 | down | 1.58 | down | 1.37  | down | ABA |
| Os.52244.2.S1_x_at | LOC_Os05g44570 | histidine-containing phosphotransfer protein, putative, expressed                   | 1.17  | up   | 1.14 | up   | 4.12   | up   | 1.01 | up   | 1.41 | up   | 1.13  | up   | ABA |
| Os.5225.1.S1_at    | LOC_Os01g53420 | anthocyanidin 5,3-O-glucosyltransferase, putative, expressed                        | 2.27  | down | 1.42 | up   | 4.25   | down | 1.07 | up   | 1.09 | down | 2.29  | up   | 3   |
| Os.52261.1.S1_at   | LOC_Os04g47360 | OsPOP9 - Putative Prolyl Oligopeptidase homologue, expressed                        | 1.03  | up   | 1.88 | up   | 2.05   | down | 1.39 | down | 1.22 | down | 1.42  | down | ABA |
| Os.52263.1.S1_at   | LOC_Os02g50730 | metalloendopeptinase 1 precursor, putative, expressed                               | 1.28  | up   | 1.30 | up   | 4.83   | up   | 1.31 | down | 3.46 | up   | 1.06  | down | 2   |
| Os.52282.1.S1_at   | LOC_Os04g28780 | serine/threonine-protein kinase receptor precursor, putative, expressed             | 1.55  | down | 1.62 | down | 3.91   | down | 1.03 | up   | 1.43 | down | 1.20  | down | ABA |
| Os.52284.2.S1_x_at | LOC_Os02g35820 | retrotransposon protein, putative, unclassified, expressed                          | 1.06  | up   | 1.02 | up   | 2.22   | up   | 1.22 | up   | 1.10 | up   | 1.06  | down | ABA |
| Os.52286.1.S1_at   | LOC_Os01g60780 | solute carrier family 35 member E3, putative, expressed                             | 1.32  | down | 1.97 | up   | 2.48   | down | 1.28 | down | 1.30 | down | 1.24  | down | ABA |
| Os.5230.1.S1_at    | LOC_Os11g30810 | sulfotransferase domain containing protein, expressed                               | 1.46  | down | 1.01 | up   | 1.20   | down | 1.38 | down | 2.03 | down | 2.81  | up   | 2   |
| Os.52303.1.S1_x_at | LOC_Os11g45820 | expressed protein                                                                   | 1.07  | up   | 1.02 | up   | 2.10   | up   | 1.16 | up   | 1.10 | up   | 1.02  | up   | ABA |
| Os.52307.1.S1_at   | LOC_Os04g35760 | expressed protein                                                                   | 1.24  | up   | 1.10 | up   | 4.23   | down | 1.61 | down | 1.81 | down | 1.35  | down | ABA |
| Os.52314.1.S2_at   | LOC_Os04g52940 | SIT4 phosphatase-associated protein domain containing protein, expressed            | 1.02  | up   | 1.39 | down | 2.83   | down | 1.15 | down | 1.47 | down | 1.22  | down | ABA |
| Os.52327.1.S1_at   | LOC_Os03g04120 | AMP-binding enzyme, putative, expressed                                             | 1.36  | down | 1.65 | down | 4.35   | up   | 1.32 | up   | 1.94 | up   | 2.28  | up   | 2   |
| Os.52329.1.S1_at   | LOC_Os02g07044 | rhodanese-like domain containing protein, putative, expressed                       | 1.53  | up   | 1.08 | down | 2.82   | down | 1.19 | down | 1.86 | up   | 1.38  | up   | ABA |

|                    |                |                                                                                  |      |      |      |      |        |      |      |      |      |      |      |      |     |
|--------------------|----------------|----------------------------------------------------------------------------------|------|------|------|------|--------|------|------|------|------|------|------|------|-----|
| Os.52344.1.S1_at   | LOC_Os08g26840 | plant protein of unknown function domain containing protein, expressed           | 1.45 | down | 1.07 | down | 9.98   | down | 1.70 | up   | 1.49 | down | 1.66 | up   | ABA |
| Os.52381.1.S1_at   | AK066750       | Oryza sativa Japonica Group cDNA clone:J013074O22, full insert sequence.         | 1.15 | up   | 1.45 | up   | 6.30   | up   | 1.49 | down | 1.16 | up   | 1.66 | down | ABA |
| Os.52391.1.S1_x_at | LOC_Os08g01920 | SGR2, putative, expressed                                                        | 1.03 | down | 1.05 | down | 2.56   | up   | 1.07 | up   | 1.39 | up   | 1.08 | up   | ABA |
| Os.52393.1.S1_at   | AK066822       | expressed protein                                                                | 1.06 | down | 1.03 | down | 2.03   | down | 1.09 | down | 1.25 | down | 1.15 | down | ABA |
| Os.52409.1.S1_s_at | LOC_Os10g04620 | OsPOP20 - Putative Prolyl Oligopeptidase homologue, expressed                    | 1.27 | up   | 1.25 | down | 2.30   | up   | 1.02 | up   | 1.74 | up   | 1.16 | up   | ABA |
| Os.52416.1.S1_at   | LOC_Os02g49820 | RNA recognition motif family protein, expressed                                  | 1.03 | up   | 1.22 | up   | 2.44   | down | 1.33 | down | 1.44 | down | 1.54 | down | ABA |
| Os.52419.1.S1_at   | LOC_Os06g02000 | adenylate kinase, putative, expressed                                            | 1.02 | down | 1.05 | down | 2.66   | up   | 1.47 | down | 2.12 | down | 2.09 | down | 3   |
| Os.5243.1.S1_at    | LOC_Os02g55320 | two-component response regulator, putative, expressed                            | 1.12 | down | 1.05 | up   | 2.17   | up   | 1.03 | down | 1.14 | up   | 1.01 | down | ABA |
| Os.52438.1.S1_at   | LOC_Os05g36010 | OsSub47 - Putative Subtilisin homologue, expressed                               | 1.12 | up   | 1.21 | down | 6.10   | down | 1.22 | down | 1.37 | down | 1.04 | up   | ABA |
| Os.52445.1.S1_at   | LOC_Os04g46740 | pectinesterase, putative, expressed                                              | 1.19 | down | 1.31 | down | 3.05   | down | 1.46 | down | 1.49 | down | 1.26 | down | ABA |
| Os.52460.1.S1_at   | LOC_Os06g23114 | copper methylamine oxidase precursor, putative, expressed                        | 1.16 | up   | 1.22 | up   | 1.48   | down | 3.12 | down | 1.30 | up   | 1.15 | up   | ACC |
| Os.52465.1.S1_at   | LOC_Os07g36210 | expressed protein                                                                | 1.22 | down | 1.64 | up   | 4.89   | down | 1.35 | up   | 1.44 | down | 1.24 | down | ABA |
| Os.52469.1.S1_at   | AK067317       | Oryza sativa Japonica Group cDNA clone:J013105D21, full insert sequence.         | 1.44 | up   | 1.50 | up   | 6.77   | down | 1.21 | down | 1.85 | down | 1.62 | up   | ABA |
| Os.52482.1.S1_at   | LOC_Os07g36630 | CSLF8 - cellulose synthase-like family F; beta1,3;1,4 glucan synthase, expressed | 1.91 | down | 1.35 | down | 13.09  | down | 1.67 | down | 2.09 | down | 1.47 | up   | 2   |
| Os.52483.1.S1_at   | LOC_Os06g19380 | expressed protein                                                                | 1.06 | down | 1.33 | up   | 2.49   | down | 1.35 | down | 1.67 | down | 1.34 | down | ABA |
| Os.52486.1.S1_at   | LOC_Os05g16824 | SHR5-receptor-like kinase, putative, expressed                                   | 1.00 | down | 1.22 | down | 1.22   | up   | 1.03 | up   | 1.01 | up   | 6.07 | up   | JA  |
| Os.52491.1.A1_at   | LOC_Os05g44420 | expressed protein                                                                | 1.12 | up   | 2.57 | down | 1.27   | down | 1.03 | down | 1.13 | up   | 1.27 | up   | BAP |
| Os.52500.1.S1_at   | LOC_Os05g25890 | expressed protein                                                                | 1.01 | down | 1.00 | up   | 1.12   | down | 1.10 | down | 1.17 | up   | 2.65 | up   | JA  |
| Os.52522.1.S1_at   | LOC_Os08g45130 | histone-lysine N-methyltransferase, putative, expressed                          | 1.02 | down | 1.06 | up   | 2.25   | down | 1.13 | up   | 1.14 | down | 1.12 | down | ABA |
| Os.52527.1.S1_s_at | LOC_Os06g03560 | oligopeptide transporter, putative, expressed                                    | 1.59 | down | 1.16 | up   | 4.67   | down | 1.70 | up   | 2.21 | down | 1.28 | down | 2   |
| Os.52534.1.S1_x_at | NM_001067852   | Oryza sativa (japonica cultivar-group) Os08g0236800 (Os08g0236800) mRNA, partial | 1.06 | down | 1.08 | down | 2.73   | up   | 1.01 | down | 1.22 | up   | 1.11 | up   | ABA |
| Os.52542.1.S1_at   | LOC_Os03g60520 | expressed protein                                                                | 1.01 | up   | 1.53 | down | 2.13   | up   | 1.14 | up   | 1.52 | up   | 1.32 | up   | ABA |
| Os.52543.1.S1_at   | LOC_Os04g53580 | P21-Rho-binding domain containing protein, putative, expressed                   | 1.07 | down | 1.37 | up   | 2.65   | down | 1.03 | down | 1.18 | down | 1.07 | down | ABA |
| Os.52552.1.S1_at   | LOC_Os06g22390 | expressed protein                                                                | 1.08 | down | 1.11 | down | 2.56   | up   | 1.10 | down | 1.14 | down | 2.06 | down | 2   |
| Os.52555.1.S1_at   | LOC_Os06g46910 | ZOS6-07 - C2H2 zinc finger protein, expressed                                    | 1.25 | up   | 1.92 | up   | 17.05  | up   | 1.24 | up   | 1.96 | up   | 1.28 | up   | ABA |
| Os.52568.1.S1_at   | LOC_Os12g02800 | CRP11 - Cysteine-rich family protein precursor, expressed                        | 1.29 | down | 1.28 | down | 5.77   | up   | 1.14 | down | 1.05 | up   | 1.01 | down | ABA |
| Os.52568.1.S1_s_at | LOC_Os11g02820 | CRP10 - Cysteine-rich family protein precursor, expressed                        | 1.08 | down | 1.10 | down | 4.23   | up   | 1.01 | up   | 1.01 | down | 1.10 | down | ABA |
| Os.52569.1.S1_at   | LOC_Os02g47210 | amino acid permease family protein, putative, expressed                          | 1.19 | down | 2.29 | up   | 3.64   | down | 1.42 | down | 1.30 | down | 1.05 | up   | 2   |
| Os.52574.1.S1_at   | LOC_Os04g41450 | TGF-beta receptor, type I/II extracellular region, putative, expressed           | 1.14 | down | 2.29 | up   | 6.06   | down | 1.47 | down | 1.72 | down | 1.80 | down | 2   |
| Os.52574.2.S1_x_at | LOC_Os04g41450 | TGF-beta receptor, type I/II extracellular region, putative, expressed           | 1.35 | up   | 2.75 | up   | 2.36   | down | 1.26 | down | 1.51 | down | 1.64 | down | 2   |
| Os.52579.1.S1_at   | LOC_Os06g22070 | mitochondrial glycoprotein, putative, expressed                                  | 1.05 | down | 1.05 | up   | 2.29   | down | 1.10 | up   | 1.44 | down | 1.42 | down | ABA |
| Os.52590.1.S1_at   | LOC_Os04g59540 | phosphatidylinositol-4-phosphate 5-Kinase, putative, expressed                   | 1.00 | down | 1.00 | down | 8.65   | up   | 1.00 | up   | 1.01 | up   | 1.02 | up   | ABA |
| Os.52597.1.S1_at   | LOC_Os06g42850 | extracellular ligand-gated ion channel, putative, expressed                      | 1.22 | up   | 1.16 | up   | 584.65 | up   | 1.92 | down | 2.53 | up   | 1.83 | down | 2   |
| Os.52613.1.S1_at   | LOC_Os06g42850 | extracellular ligand-gated ion channel, putative, expressed                      | 1.13 | down | 1.18 | up   | 6.86   | up   | 1.01 | down | 1.06 | up   | 1.08 | down | ABA |
| Os.52621.1.S1_at   | LOC_Os12g44100 | peptide transporter PTR2, putative, expressed                                    | 1.06 | up   | 1.16 | down | 2.65   | up   | 1.20 | down | 1.24 | up   | 1.25 | up   | ABA |
| Os.52627.1.S1_at   | LOC_Os08g26230 | expressed protein                                                                | 1.08 | up   | 1.00 | up   | 2.71   | down | 1.34 | down | 1.32 | up   | 1.27 | up   | ABA |
| Os.52638.1.S1_at   | LOC_Os02g58120 | oxidoreductase/ transition metal ion binding protein, putative, expressed        | 1.09 | up   | 1.03 | up   | 3.01   | down | 1.24 | down | 1.58 | down | 1.27 | down | ABA |
| Os.52641.1.S1_at   | LOC_Os09g30486 | fasciclin domain containing protein, expressed                                   | 1.35 | down | 1.04 | down | 4.73   | down | 1.55 | down | 2.59 | down | 1.30 | down | 2   |
| Os.52645.1.S1_at   | LOC_Os06g17390 | auxin-independent growth promoter protein, putative, expressed                   | 1.10 | down | 1.19 | down | 2.24   | down | 1.08 | down | 1.42 | down | 1.61 | up   | ABA |
| Os.52646.1.S1_at   | LOC_Os05g03640 | flavonol synthase/flavanone 3-hydroxylase, putative, expressed                   | 3.23 | down | 2.33 | up   | 11.51  | down | 1.02 | down | 2.28 | down | 4.80 | up   | 5   |
| Os.52648.1.S1_at   | LOC_Os04g35540 | amino acid permease family protein, putative, expressed                          | 1.18 | down | 1.31 | down | 1.30   | up   | 1.15 | up   | 2.43 | up   | 1.60 | up   | SA  |
| Os.52664.1.S1_at   | LOC_Os02g47400 | pectinacetyltransferase domain containing protein, expressed                     | 1.00 | up   | 1.08 | up   | 3.49   | down | 1.35 | down | 1.92 | down | 1.34 | down | ABA |
| Os.52672.1.S1_at   | LOC_Os08g16130 | fiber protein Fb34, putative, expressed                                          | 1.02 | down | 1.03 | down | 2.28   | down | 1.03 | down | 1.38 | down | 1.06 | down | ABA |
| Os.52678.1.S1_at   | LOC_Os04g41130 | osFTL6 FT-Like6 homologue to Flowering Locus T gene; contains Pfam profile PF01  | 1.93 | down | 3.09 | up   | 2.50   | down | 1.95 | up   | 1.76 | down | 4.47 | down | 3   |
| Os.52681.1.S1_at   | LOC_Os06g08390 | Ser/Thr protein phosphatase family protein, putative, expressed                  | 1.25 | up   | 1.14 | up   | 2.45   | up   | 1.07 | down | 1.07 | up   | 1.00 | up   | ABA |
| Os.52682.1.S1_at   | LOC_Os06g22440 | SAM dependent carboxyl methyltransferase, putative, expressed                    | 1.14 | down | 1.14 | down | 3.10   | down | 1.09 | up   | 1.57 | down | 1.11 | up   | ABA |
| Os.52689.1.S1_at   | LOC_Os03g48310 | plasma membrane ATPase, putative, expressed                                      | 1.16 | up   | 1.11 | up   | 21.49  | up   | 1.17 | down | 1.03 | up   | 1.07 | up   | ABA |
| Os.52689.1.S2_at   | LOC_Os03g48310 | plasma membrane ATPase, putative, expressed                                      | 1.01 | up   | 1.05 | down | 33.91  | up   | 1.45 | down | 1.52 | up   | 1.24 | up   | ABA |
| Os.5270.1.S1_at    | LOC_Os05g44200 | GDSL-like lipase/acylhydrolase, putative, expressed                              | 1.10 | up   | 1.00 | up   | 7.26   | down | 1.24 | down | 1.23 | down | 1.08 | up   | ABA |
| Os.52709.1.S1_at   | AK068854       | Oryza sativa Japonica Group cDNA clone:J013170J18, full insert sequence.         | 1.01 | down | 1.00 | up   | 2.67   | up   | 1.00 | up   | 1.00 | down | 1.02 | up   | ABA |
| Os.52712.1.S1_at   | LOC_Os09g26840 | expressed protein                                                                | 1.44 | up   | 2.02 | down | 3.63   | up   | 6.09 | up   | 1.90 | up   | 1.48 | down | 3   |
| Os.52715.1.S1_at   | LOC_Os09g17810 | leucine zipper protein-like, putative, expressed                                 | 1.12 | up   | 1.14 | down | 2.88   | up   | 1.14 | up   | 1.01 | down | 1.21 | up   | ABA |
| Os.52742.1.S1_at   | LOC_Os05g11010 | harpin-induced protein 1 domain containing protein, expressed                    | 1.47 | down | 1.09 | down | 2.24   | down | 1.02 | up   | 1.36 | down | 1.79 | up   | ABA |
| Os.52750.1.S1_x_at | LOC_Os09g03190 | expressed protein                                                                | 1.09 | down | 1.23 | down | 2.26   | up   | 1.14 | up   | 3.44 | up   | 1.13 | up   | 2   |
| Os.52754.1.S1_x_at | LOC_Os03g50220 | homologous-pairing protein meu13, putative, expressed                            | 1.04 | down | 1.09 | down | 3.06   | down | 1.03 | down | 1.58 | down | 1.58 | down | ABA |



|                    |                |                                                                           |       |      |      |      |        |      |      |      |      |      |      |      |     |
|--------------------|----------------|---------------------------------------------------------------------------|-------|------|------|------|--------|------|------|------|------|------|------|------|-----|
| Os.52760.1.S1_at   | LOC_Os12g16650 | Cyclopropane-fatty-acyl-phospholipid synthase, putative, expressed        | 1.12  | down | 1.63 | up   | 2.08   | down | 1.12 | down | 1.54 | down | 4.49 | up   | 2   |
| Os.52767.1.A1_at   | LOC_Os08g35160 | heat shock protein DnaJ, putative, expressed                              | 1.21  | up   | 1.44 | up   | 7.67   | down | 1.85 | up   | 1.80 | down | 2.19 | down | 2   |
| Os.52777.1.S1_at   | AK063889       | Oryza sativa Japonica Group cDNA clone:001-122-G04, full insert sequence. | 1.24  | up   | 1.36 | down | 20.34  | up   | 1.53 | up   | 1.02 | up   | 1.23 | down | ABA |
| Os.52778.1.S1_at   | LOC_Os02g50810 | expressed protein                                                         | 1.10  | down | 1.09 | up   | 3.62   | down | 1.02 | down | 1.34 | down | 1.24 | down | ABA |
| Os.52780.1.S1_at   | LOC_Os05g07710 | WD40-like domain containing protein, putative, expressed                  | 1.15  | up   | 1.31 | down | 6.20   | up   | 1.32 | up   | 1.59 | up   | 1.74 | up   | ABA |
| Os.52791.1.S1_at   | LOC_Os09g39960 | dynamain family protein, putative, expressed                              | 1.08  | up   | 1.18 | down | 1.90   | up   | 1.31 | up   | 2.10 | up   | 1.27 | up   | SA  |
| Os.52793.1.S1_at   | LOC_Os04g43840 | possible lysine decarboxylase domain containing protein, expressed        | 1.31  | down | 5.30 | up   | 2.18   | down | 1.72 | down | 1.77 | down | 1.86 | down | 2   |
| Os.52803.1.S1_at   | LOC_Os06g44500 | OsFBK17 - F-box domain and kelch repeat containing protein, expressed     | 1.02  | up   | 1.14 | down | 3.15   | down | 1.21 | up   | 1.25 | down | 1.41 | down | ABA |
| Os.52814.1.S1_at   | LOC_Os05g49480 | transcription factor-related, putative, expressed                         | 1.02  | down | 1.01 | down | 3.67   | up   | 1.02 | up   | 1.06 | up   | 1.01 | up   | ABA |
| Os.52824.1.S1_at   | LOC_Os03g40070 | transposon protein, putative, unclassified, expressed                     | 1.31  | down | 1.04 | up   | 7.52   | down | 1.04 | down | 1.06 | up   | 1.92 | down | ABA |
| Os.52831.1.S1_at   | LOC_Os03g28090 | pectinesterase, putative, expressed                                       | 1.20  | down | 1.27 | down | 7.93   | up   | 1.01 | up   | 1.02 | up   | 1.05 | up   | ABA |
| Os.52833.1.S1_at   | LOC_Os08g02110 | peroxidase precursor, putative, expressed                                 | 2.28  | down | 1.35 | up   | 4.16   | down | 1.33 | up   | 1.95 | down | 1.40 | down | 3   |
| Os.52835.1.S1_at   | LOC_Os08g30900 | YDG/SRA domain containing protein, expressed                              | 1.01  | down | 1.00 | up   | 2.12   | up   | 1.01 | up   | 1.01 | up   | 1.02 | up   | ABA |
| Os.52843.1.S1_at   | LOC_Os07g04210 | Ser/Thr protein phosphatase family protein, putative                      | 1.17  | up   | 1.09 | down | 2.50   | up   | 1.05 | down | 1.49 | up   | 1.26 | up   | ABA |
| Os.52845.1.S1_at   | AK069569       | expressed protein                                                         | 5.05  | down | 2.23 | down | 15.87  | down | 1.82 | down | 3.30 | down | 1.51 | down | 4   |
| Os.52863.1.S1_at   | LOC_Os09g22000 | hydrolase, HAD superfamily, Cof family, putative, expressed               | 1.12  | down | 1.11 | down | 1.01   | up   | 1.11 | up   | 1.02 | down | 4.48 | up   | JA  |
| Os.52870.1.S1_at   | LOC_Os11g34710 | Ser/Thr protein phosphatase family protein, putative, expressed           | 1.37  | down | 1.20 | down | 1.27   | down | 1.08 | down | 1.03 | down | 2.65 | up   | JA  |
| Os.52910.1.S1_at   | LOC_Os04g55700 | exonuclease, putative, expressed                                          | 1.73  | up   | 1.19 | up   | 2.05   | up   | 1.82 | up   | 4.50 | up   | 2.09 | up   | 3   |
| Os.52913.1.A1_at   | LOC_Os08g43450 | MYB-like protein 1, putative, expressed                                   | 1.36  | up   | 1.40 | up   | 2.71   | down | 1.54 | down | 1.80 | down | 1.58 | down | ABA |
| Os.52921.1.S1_at   | LOC_Os08g14760 | AMP-binding domain containing protein, expressed                          | 1.54  | down | 1.20 | up   | 5.21   | down | 1.02 | down | 2.26 | down | 1.33 | down | 2   |
| Os.52940.1.S1_at   | LOC_Os12g05600 | hydrolase, alpha/beta fold family protein, putative, expressed            | 1.06  | down | 1.53 | up   | 3.23   | down | 2.48 | down | 1.46 | down | 1.41 | down | 2   |
| Os.52955.1.A1_at   | LOC_Os12g42220 | expressed protein                                                         | 1.24  | up   | 1.26 | up   | 37.10  | up   | 1.47 | up   | 1.32 | up   | 1.12 | down | ABA |
| Os.52956.1.S1_at   | LOC_Os04g20330 | UDP-glucuronosyl/UDP-glucosyl transferase, putative, expressed            | 2.77  | up   | 1.06 | up   | 1.03   | up   | 1.32 | down | 1.58 | down | 1.53 | down | IAA |
| Os.52974.1.S1_at   | LOC_Os04g50940 | peptide transporter PTR2, putative, expressed                             | 1.59  | down | 5.31 | up   | 1.13   | up   | 1.13 | up   | 1.16 | up   | 3.31 | up   | 2   |
| Os.52992.1.S1_a_at | LOC_Os05g37970 | universal stress protein domain containing protein, putative, expressed   | 1.00  | up   | 1.07 | up   | 3.16   | up   | 1.05 | up   | 2.59 | up   | 1.02 | down | 2   |
| Os.52999.1.S1_at   | LOC_Os12g43810 | expressed protein                                                         | 1.07  | down | 1.88 | up   | 2.15   | down | 1.35 | down | 1.47 | down | 1.46 | down | ABA |
| Os.53007.1.S1_at   | LOC_Os02g52360 | peptidyl-prolyl cis-trans isomerase CYP40, putative, expressed            | 1.47  | down | 1.07 | down | 3.08   | down | 1.14 | down | 1.03 | down | 1.26 | down | ABA |
| Os.53019.1.S1_at   | LOC_Os11g05740 | B3 DNA binding domain containing protein, expressed                       | 12.74 | up   | 2.42 | up   | 2.20   | down | 1.55 | down | 1.37 | down | 1.68 | down | 3   |
| Os.53054.1.S1_at   | LOC_Os02g45870 | tobamovirus multiplication protein, putative, expressed                   | 1.16  | down | 1.40 | up   | 2.50   | down | 1.20 | down | 1.15 | down | 1.66 | up   | ABA |
| Os.53108.1.S1_at   | LOC_Os02g58160 | expressed protein                                                         | 1.20  | up   | 1.23 | up   | 9.29   | up   | 1.42 | down | 1.05 | down | 1.14 | down | ABA |
| Os.53114.1.S1_at   | LOC_Os07g48610 | hydrolase, alpha/beta fold family domain containing protein, expressed    | 1.09  | up   | 1.15 | up   | 2.48   | down | 1.07 | down | 1.05 | down | 1.07 | down | ABA |
| Os.53115.1.S2_at   | AK072949       | Oryza sativa Japonica Group cDNA clone:J023147J15, full insert sequence.  | 1.11  | up   | 1.14 | down | 3.73   | up   | 1.05 | down | 1.50 | up   | 1.02 | down | ABA |
| Os.53117.1.S1_x_at | AK070901       | Oryza sativa Japonica Group cDNA clone:J023073O19, full insert sequence.  | 1.15  | down | 1.14 | down | 24.33  | up   | 1.40 | down | 3.95 | up   | 1.12 | down | 2   |
| Os.5313.1.S1_at    | LOC_Os08g09350 | gar2, putative, expressed                                                 | 1.02  | down | 1.03 | up   | 2.12   | down | 1.14 | up   | 1.32 | down | 1.25 | down | ABA |
| Os.53130.1.S1_at   | LOC_Os06g48860 | OsSAUR28 - Auxin-responsive SAUR gene family member                       | 1.66  | down | 1.02 | down | 3.26   | down | 1.06 | up   | 1.16 | up   | 1.10 | up   | ABA |
| Os.53162.1.S1_s_at | LOC_Os04g47780 | transmembrane amino acid transporter protein, putative, expressed         | 1.53  | up   | 1.60 | up   | 2.70   | down | 2.76 | up   | 1.42 | down | 1.25 | down | 2   |
| Os.53172.1.S1_at   | LOC_Os03g20410 | aquaporin SIP2-1, putative, expressed                                     | 1.05  | down | 1.22 | up   | 2.42   | down | 1.30 | down | 1.22 | down | 1.66 | up   | ABA |
| Os.53173.1.S1_at   | LOC_Os05g37780 | expressed protein                                                         | 3.48  | down | 1.13 | down | 2.34   | down | 1.48 | up   | 1.17 | down | 2.30 | down | 3   |
| Os.53176.1.S1_at   | LOC_Os02g26720 | Inositol 1, 3, 4-trisphosphate 5/6-kinase, putative, expressed            | 1.04  | down | 1.35 | up   | 48.04  | up   | 1.00 | up   | 1.05 | up   | 2.62 | up   | 2   |
| Os.53178.1.S1_s_at | LOC_Os05g47840 | IPP transferase, putative, expressed                                      | 1.11  | down | 1.46 | up   | 11.12  | down | 1.79 | up   | 9.06 | down | 8.36 | down | 3   |
| Os.5318.1.S1_a_at  | LOC_Os10g42610 | expressed protein                                                         | 1.47  | down | 1.13 | down | 3.13   | up   | 1.99 | up   | 1.32 | up   | 1.01 | down | ABA |
| Os.53197.1.S1_at   | LOC_Os08g03370 | Divergent PAP2 family domain containing protein, expressed                | 1.15  | up   | 1.03 | down | 2.11   | down | 1.30 | down | 1.28 | down | 1.35 | down | ABA |
| Os.53206.1.S1_at   | LOC_Os06g05424 | expressed protein                                                         | 1.36  | up   | 1.17 | down | 2.30   | up   | 1.10 | down | 3.88 | up   | 1.92 | up   | 2   |
| Os.53210.1.S1_at   | LOC_Os11g26760 | dehydrin, putative, expressed                                             | 1.18  | down | 2.28 | up   | 53.10  | up   | 1.05 | down | 1.12 | up   | 1.13 | down | 2   |
| Os.53236.1.S1_at   | LOC_Os02g43170 | B-box zinc finger family protein, putative, expressed                     | 1.90  | down | 2.01 | up   | 6.21   | down | 1.01 | down | 1.48 | down | 1.48 | up   | 2   |
| Os.53237.1.S1_at   | LOC_Os07g34070 | auxin-induced protein 5NG4, putative, expressed                           | 1.32  | down | 1.79 | down | 2.54   | down | 1.49 | down | 1.72 | up   | 1.16 | up   | ABA |
| Os.53242.1.S1_at   | LOC_Os02g52180 | plastocyanin-like domain containing protein, putative, expressed          | 1.44  | down | 1.89 | up   | 2.74   | down | 1.31 | down | 1.59 | down | 1.30 | down | ABA |
| Os.53244.1.A1_at   | LOC_Os07g41230 | esterase, putative, expressed                                             | 1.17  | down | 2.14 | up   | 1.66   | up   | 1.30 | up   | 1.38 | up   | 1.59 | up   | BAP |
| Os.5325.1.S1_at    | LOC_Os08g23870 | late embryogenesis abundant group 1, putative, expressed                  | 1.02  | down | 1.17 | down | 178.11 | up   | 1.45 | down | 1.08 | up   | 1.21 | down | ABA |
| Os.53254.1.S1_at   | AK071601       | expressed protein                                                         | 18.91 | up   | 2.29 | up   | 3.08   | down | 1.81 | up   | 1.30 | up   | 2.35 | down | 4   |
| Os.53266.1.S1_at   | LOC_Os03g52010 | lecithin cholesterol acyltransferase, putative, expressed                 | 1.27  | down | 1.27 | down | 7.44   | down | 1.12 | down | 1.73 | down | 1.02 | up   | ABA |
| Os.53268.1.S1_at   | LOC_Os09g17152 | OsFBX319 - F-box domain containing protein, expressed                     | 1.01  | up   | 1.27 | up   | 1.05   | down | 1.02 | up   | 1.04 | down | 2.47 | up   | JA  |
| Os.53277.1.S1_at   | LOC_Os06g24490 | expressed protein                                                         | 1.33  | up   | 1.30 | up   | 3.42   | up   | 1.14 | up   | 1.06 | down | 1.07 | down | ABA |
| Os.53285.1.S1_x_at | LOC_Os08g29770 | endoglucanase, putative, expressed                                        | 1.38  | down | 1.57 | up   | 1.01   | down | 1.01 | down | 2.93 | up   | 1.04 | down | SA  |
| Os.53306.1.S1_at   | LOC_Os02g39560 | non-receptor tyrosine kinase spore lysis A, putative, expressed           | 1.07  | down | 1.00 | up   | 3.10   | down | 1.02 | up   | 1.12 | down | 1.07 | up   | ABA |

|                    |                |                                                                                   |      |      |      |      |         |      |      |      |      |      |      |      |     |
|--------------------|----------------|-----------------------------------------------------------------------------------|------|------|------|------|---------|------|------|------|------|------|------|------|-----|
| Os.53328.1.S1_at   | LOC_Os09g37180 | transferase family protein, putative, expressed                                   | 1.02 | up   | 1.21 | up   | 2.05    | down | 1.24 | up   | 1.59 | up   | 2.90 | up   | 2   |
| Os.53340.1.S1_at   | LOC_Os04g52390 | potassium transporter, putative, expressed                                        | 1.07 | up   | 1.07 | down | 3.40    | up   | 1.54 | down | 1.53 | up   | 1.15 | up   | ABA |
| Os.53358.1.S1_at   | LOC_Os11g37560 | expressed protein                                                                 | 1.22 | up   | 1.09 | down | 6.71    | up   | 1.03 | down | 1.06 | up   | 1.27 | down | ABA |
| Os.53368.1.S1_at   | LOC_Os07g49470 | protein kinase APK1B, chloroplast precursor, putative, expressed                  | 1.05 | down | 1.02 | down | 3.66    | up   | 1.04 | up   | 1.11 | up   | 1.11 | down | ABA |
| Os.53369.1.S1_at   | LOC_Os02g52850 | receptor-like protein kinase like protein, putative, expressed                    | 1.33 | up   | 1.10 | up   | 2.08    | down | 1.08 | down | 2.34 | up   | 1.41 | down | 2   |
| Os.53377.1.S1_at   | LOC_Os08g28870 | receptor-like protein kinase 5 precursor, putative, expressed                     | 1.55 | up   | 1.26 | down | 2.80    | down | 1.66 | down | 1.19 | up   | 1.42 | down | ABA |
| Os.53380.1.S1_at   | LOC_Os05g38980 | respiratory burst oxidase, putative, expressed                                    | 4.84 | up   | 1.08 | down | 13.75   | up   | 1.00 | up   | 1.00 | down | 1.02 | up   | 2   |
| Os.53400.1.S1_at   | AK072443       | 14-3-3 protein GF14 epsilon (GRF10)                                               | 1.02 | down | 1.04 | up   | 11.06   | up   | 1.09 | down | 1.05 | down | 1.04 | down | ABA |
| Os.53407.1.S1_at   | LOC_Os08g06210 | expressed protein                                                                 | 1.58 | down | 1.14 | down | 1.16    | down | 1.53 | up   | 3.59 | up   | 1.51 | up   | SA  |
| Os.53407.1.S1_x_at | LOC_Os08g06210 | expressed protein                                                                 | 1.49 | down | 1.36 | down | 1.18    | down | 1.51 | up   | 3.90 | up   | 1.57 | up   | SA  |
| Os.53410.1.S1_at   | LOC_Os05g39000 | KIP1, putative, expressed                                                         | 1.02 | up   | 1.01 | down | 2.88    | up   | 1.12 | up   | 1.07 | up   | 1.05 | up   | ABA |
| Os.53422.1.S1_at   | LOC_Os02g15460 | expressed protein                                                                 | 1.01 | down | 1.01 | up   | 5.14    | up   | 1.17 | down | 1.96 | up   | 1.27 | down | ABA |
| Os.53428.1.S1_at   | LOC_Os09g26370 | DUF581 domain containing protein, expressed                                       | 1.08 | down | 1.30 | down | 2.95    | up   | 1.23 | down | 1.66 | down | 1.59 | down | ABA |
| Os.53438.1.S1_at   | AK072622       | Oryza sativa Japonica Group cDNA clone:J023125G21, full insert sequence.          | 1.03 | down | 1.23 | down | 13.34   | down | 1.73 | down | 4.84 | down | 6.87 | down | 3   |
| Os.53456.1.S1_at   | LOC_Os01g32120 | OsCML11 - Calmodulin-related calcium sensor protein, expressed                    | 1.02 | down | 1.01 | down | 5.61    | up   | 1.34 | up   | 1.15 | up   | 1.56 | down | ABA |
| Os.53459.1.S1_at   | AK072753       | harpin-induced protein-related                                                    | 1.65 | up   | 1.65 | up   | 4.10    | up   | 1.55 | down | 1.08 | up   | 1.22 | down | ABA |
| Os.53489.1.S1_at   | LOC_Os11g27329 | OsSCP62 - Putative Serine Carboxypeptidase homologue, expressed                   | 1.20 | up   | 1.02 | down | 3.92    | up   | 1.16 | down | 1.26 | up   | 1.10 | up   | ABA |
| Os.53524.1.S1_at   | LOC_Os02g47060 | OsWRKY66 - Superfamily of TFs having WRKY and zinc finger domains, expressed      | 1.46 | down | 1.04 | up   | 2.52    | down | 1.17 | up   | 2.39 | down | 1.15 | up   | 2   |
| Os.53526.1.S1_at   | LOC_Os04g52110 | late embryogenesis abundant protein, group 3, putative, expressed                 | 1.04 | down | 1.01 | up   | 1285.65 | down | 1.26 | up   | 1.05 | up   | 1.07 | up   | ABA |
| Os.5354.1.S1_at    | LOC_Os12g06220 | harpin-induced protein 1 domain containing protein, expressed                     | 1.13 | up   | 1.14 | up   | 5.15    | down | 1.11 | up   | 1.02 | up   | 1.58 | down | ABA |
| Os.53541.1.S1_at   | LOC_Os06g48020 | peroxidase precursor, putative, expressed                                         | 1.01 | down | 1.01 | up   | 5.12    | up   | 1.58 | up   | 1.13 | up   | 1.02 | up   | ABA |
| Os.53549.1.S1_at   | LOC_Os05g06840 | POLE2A - Putative DNA polymerase epsilon complex subunit, expressed               | 1.02 | down | 1.08 | down | 5.04    | down | 1.15 | down | 2.56 | down | 2.74 | down | 3   |
| Os.53553.1.S1_at   | LOC_Os06g27650 | expressed protein                                                                 | 1.29 | up   | 1.12 | up   | 2.10    | up   | 1.29 | down | 1.03 | down | 1.22 | down | ABA |
| Os.53561.1.S1_at   | LOC_Os07g26110 | membrane associated DUF588 domain containing protein, putative, expressed         | 1.11 | down | 1.17 | up   | 2.56    | down | 1.05 | up   | 1.27 | up   | 1.32 | down | ABA |
| Os.53568.1.S1_at   | LOC_Os08g39560 | OTU-like cysteine protease family protein, putative, expressed                    | 1.08 | down | 1.20 | down | 3.80    | up   | 1.02 | up   | 1.42 | up   | 1.07 | down | ABA |
| Os.53574.1.S1_at   | LOC_Os06g08280 | protein kinase domain containing protein, expressed                               | 1.85 | up   | 1.31 | down | 6.21    | up   | 1.19 | up   | 1.61 | up   | 1.02 | up   | ABA |
| Os.53587.1.S1_at   | LOC_Os12g02720 | DUF567 domain containing protein, putative, expressed                             | 2.65 | up   | 1.17 | up   | 7.50    | down | 1.21 | up   | 1.14 | down | 1.27 | down | 2   |
| Os.53589.1.S1_at   | LOC_Os01g72710 | expressed protein                                                                 | 1.03 | up   | 1.14 | down | 2.24    | down | 1.26 | up   | 1.18 | down | 1.12 | up   | ABA |
| Os.5361.1.S1_at    | LOC_Os12g39380 | BTBN24 - Bric-a-Brac, Tramtrack, Broad Complex BTB domain with non-phototropic hy | 1.19 | up   | 1.30 | up   | 2.52    | down | 1.12 | down | 1.39 | down | 1.37 | down | ABA |
| Os.53616.1.S1_at   | LOC_Os01g71060 | xylanase inhibitor, putative, expressed                                           | 1.17 | down | 1.49 | down | 2.71    | down | 1.90 | down | 1.94 | down | 2.39 | up   | 2   |
| Os.53619.1.S1_at   | LOC_Os01g73300 | VAMP-like protein YKT62, putative, expressed                                      | 1.13 | down | 1.08 | up   | 3.53    | up   | 1.02 | up   | 1.31 | up   | 1.06 | down | ABA |
| Os.53627.1.S1_at   | AK073654       | Oryza sativa Japonica Group cDNA clone:J033050E11, full insert sequence.          | 1.05 | down | 1.32 | down | 5.37    | up   | 1.39 | down | 1.02 | down | 1.57 | down | ABA |
| Os.53628.1.S1_x_at | LOC_Os03g61810 | tRNA-specific adenosine deaminase, putative, expressed                            | 1.04 | down | 1.17 | down | 1.41    | down | 1.27 | down | 1.15 | down | 2.04 | up   | JA  |
| Os.53632.1.S1_at   | LOC_Os05g13370 | OsRhmbd12 - Putative Rhomboid homologue, expressed                                | 1.02 | up   | 1.06 | up   | 2.38    | up   | 1.12 | down | 1.11 | down | 1.20 | down | ABA |
| Os.53636.1.S1_at   | AK073680       | zinc finger (C3HC4-type RING finger) family protein                               | 1.10 | down | 1.03 | up   | 5.03    | up   | 1.19 | up   | 1.11 | up   | 1.03 | up   | ABA |
| Os.5365.1.S1_at    | LOC_Os02g21040 | aspartic proteinase nepenthesin precursor, putative, expressed                    | 2.14 | up   | 1.39 | up   | 2.00    | up   | 1.36 | up   | 1.47 | up   | 2.99 | up   | 3   |
| Os.53651.1.S1_at   | LOC_Os06g43960 | expressed protein                                                                 | 1.15 | up   | 1.06 | up   | 2.62    | up   | 1.03 | down | 1.12 | up   | 1.05 | up   | ABA |
| Os.53660.1.S1_at   | LOC_Os02g43790 | ethylene-responsive transcription factor, putative, expressed                     | 1.57 | up   | 2.21 | up   | 2.37    | down | 1.22 | up   | 1.30 | up   | 2.62 | up   | 3   |
| Os.53665.1.S1_at   | LOC_Os02g52370 | armadillo/beta-catenin repeat family protein, putative, expressed                 | 1.09 | up   | 1.17 | up   | 2.18    | down | 1.21 | down | 1.44 | down | 1.10 | down | ABA |
| Os.53667.1.S1_at   | LOC_Os06g35480 | peroxidase precursor, putative, expressed                                         | 1.45 | down | 1.01 | down | 5.19    | down | 2.02 | up   | 2.69 | down | 1.46 | up   | 3   |
| Os.53669.1.S1_at   | LOC_Os04g36630 | expressed protein                                                                 | 1.02 | up   | 1.03 | down | 2.44    | up   | 1.18 | up   | 1.32 | up   | 1.02 | up   | ABA |
| Os.5367.1.S1_at    | LOC_Os01g40094 | protein phosphatase 2C, putative, expressed                                       | 1.29 | up   | 1.33 | down | 23.06   | up   | 1.70 | down | 2.61 | up   | 1.37 | up   | 2   |
| Os.53681.1.S1_at   | LOC_Os04g41750 | expressed protein                                                                 | 1.17 | down | 1.91 | down | 3.25    | up   | 1.75 | down | 1.30 | down | 2.43 | down | 2   |
| Os.5369.1.S1_at    | LOC_Os08g43440 | cytochrome P450, putative, expressed                                              | 1.35 | down | 1.23 | down | 2.83    | down | 1.09 | down | 1.25 | down | 1.19 | down | ABA |
| Os.53691.1.S1_at   | LOC_Os03g05060 | exostosin family domain containing protein, expressed                             | 3.38 | down | 1.47 | down | 4.56    | down | 1.10 | down | 2.47 | down | 1.97 | down | 4   |
| Os.53704.1.S1_x_at | LOC_Os05g48900 | fasciclin domain containing protein, expressed                                    | 1.13 | down | 1.02 | up   | 2.25    | down | 1.21 | down | 1.51 | down | 1.03 | down | ABA |
| Os.53705.1.S1_at   | LOC_Os06g45060 | expressed protein                                                                 | 1.13 | up   | 1.08 | up   | 2.51    | up   | 1.09 | up   | 1.50 | up   | 1.23 | up   | ABA |
| Os.53706.1.S1_at   | LOC_Os02g12420 | receptor-like protein kinase precursor, putative, expressed                       | 1.01 | down | 1.00 | up   | 2.88    | up   | 1.02 | up   | 1.04 | up   | 1.03 | up   | ABA |
| Os.53710.1.S1_at   | LOC_Os01g25500 | sterol carrier protein-2, putative, expressed                                     | 1.14 | down | 1.30 | up   | 3.36    | down | 1.07 | down | 1.35 | down | 1.34 | up   | ABA |
| Os.53716.1.S1_at   | LOC_Os03g11230 | expressed protein                                                                 | 1.29 | up   | 1.15 | up   | 2.04    | down | 1.18 | down | 1.36 | down | 1.27 | down | ABA |
| Os.53721.1.S1_at   | LOC_Os03g30830 | X8 domain containing protein, expressed                                           | 1.34 | down | 1.04 | down | 2.59    | down | 1.03 | down | 1.16 | down | 1.01 | down | ABA |
| Os.53726.1.S1_at   | LOC_Os07g05370 | TKL_IRAK_CrRLK1L-1.15 - The CrRLK1L-1 subfamily has homology to the CrRLK1L h     | 1.56 | up   | 1.97 | up   | 11.53   | up   | 1.58 | up   | 1.72 | up   | 2.39 | down | 3   |
| Os.53744.2.S1_x_at | LOC_Os12g40419 | protein kinase domain containing protein, expressed                               | 1.21 | down | 1.17 | down | 2.99    | up   | 1.05 | up   | 1.15 | up   | 1.13 | down | ABA |
| Os.53748.1.S1_at   | LOC_Os02g37950 | transposon protein, putative, unclassified, expressed                             | 2.57 | up   | 1.19 | up   | 1.03    | up   | 1.16 | down | 1.01 | down | 1.03 | down | IAA |
| Os.53766.1.S1_at   | LOC_Os08g37690 | expressed protein                                                                 | 1.23 | up   | 1.08 | down | 4.95    | up   | 1.24 | down | 1.22 | up   | 1.09 | down | ABA |

|                    |                |                                                                                   |      |      |      |      |       |      |      |      |      |      |       |      |     |
|--------------------|----------------|-----------------------------------------------------------------------------------|------|------|------|------|-------|------|------|------|------|------|-------|------|-----|
| Os.53771.1.A1_at   | LOC_Os09g06560 | WD domain, G-beta repeat domain containing protein, expressed                     | 1.15 | down | 1.08 | up   | 7.58  | down | 1.18 | down | 2.83 | down | 1.84  | down | 2   |
| Os.53771.1.A2_at   | LOC_Os09g06560 | WD domain, G-beta repeat domain containing protein, expressed                     | 1.70 | down | 1.12 | down | 7.16  | down | 1.09 | down | 2.44 | down | 1.77  | down | 2   |
| Os.53775.1.S1_at   | LOC_Os02g01890 | cytochrome P450, putative, expressed                                              | 1.42 | down | 1.64 | down | 2.76  | down | 1.25 | up   | 1.11 | down | 1.67  | up   | ABA |
| Os.53788.1.S1_at   | LOC_Os04g10434 | amidase family protein, putative, expressed                                       | 1.60 | down | 1.62 | down | 3.27  | down | 1.25 | down | 1.71 | down | 1.65  | down | ABA |
| Os.53796.1.S1_at   | LOC_Os04g33760 | DUF584 domain containing protein, putative, expressed                             | 1.55 | up   | 1.42 | up   | 1.02  | up   | 1.35 | down | 1.49 | down | 2.50  | down | JA  |
| Os.53801.1.S1_at   | LOC_Os03g17800 | phosphatidylinositol transfer protein alpha isoform, putative, expressed          | 1.30 | up   | 1.16 | down | 7.25  | up   | 1.10 | down | 1.52 | up   | 1.07  | up   | ABA |
| Os.53814.1.S1_at   | LOC_Os09g04050 | dehydrogenase, putative, expressed                                                | 1.01 | up   | 1.65 | up   | 2.94  | down | 1.34 | up   | 1.62 | down | 2.60  | up   | 2   |
| Os.53815.1.S1_at   | LOC_Os03g04890 | zinc finger family protein, putative, expressed                                   | 2.83 | up   | 1.20 | down | 5.56  | up   | 3.18 | up   | 6.51 | up   | 2.93  | up   | 5   |
| Os.53830.1.S1_at   | LOC_Os02g40840 | alcohol oxidase, putative, expressed                                              | 1.64 | down | 2.00 | up   | 1.40  | up   | 1.21 | up   | 1.20 | down | 5.45  | up   | 2   |
| Os.53852.1.S1_at   | LOC_Os04g13210 | multidrug resistance-associated protein, putative, expressed                      | 1.20 | down | 1.23 | up   | 1.51  | up   | 1.06 | down | 3.77 | up   | 1.51  | up   | SA  |
| Os.53853.1.S1_at   | LOC_Os03g11490 | expressed protein                                                                 | 1.00 | up   | 1.00 | down | 7.18  | up   | 1.15 | down | 1.20 | down | 1.16  | down | ABA |
| Os.53856.1.S1_at   | LOC_Os01g34860 | expressed protein                                                                 | 1.17 | down | 1.00 | down | 7.83  | up   | 1.15 | down | 1.08 | up   | 1.00  | up   | ABA |
| Os.53867.1.S1_s_at | LOC_Os12g38910 | expressed protein                                                                 | 1.05 | down | 1.01 | down | 4.10  | up   | 1.11 | down | 1.28 | up   | 1.52  | down | ABA |
| Os.53873.1.S1_x_at | LOC_Os02g57140 | expressed protein                                                                 | 1.22 | down | 1.13 | down | 2.89  | down | 1.07 | up   | 1.14 | down | 1.19  | down | ABA |
| Os.5388.1.S1_at    | LOC_Os02g42940 | MSP domain containing protein, expressed                                          | 1.12 | up   | 1.17 | up   | 2.39  | up   | 1.16 | down | 1.13 | up   | 1.16  | down | ABA |
| Os.53880.1.S1_at   | LOC_Os08g26880 | bZIP transcription factor domain containing protein, expressed                    | 1.30 | up   | 1.16 | up   | 6.22  | down | 1.15 | down | 1.51 | down | 1.02  | down | ABA |
| Os.53886.1.S1_at   | LOC_Os04g49000 | zinc finger, C3HC4 type domain containing protein, expressed                      | 2.02 | up   | 2.02 | up   | 11.68 | up   | 1.04 | down | 1.13 | down | 1.14  | down | 3   |
| Os.53919.1.S1_at   | LOC_Os02g09220 | cytochrome P450, putative, expressed                                              | 2.35 | down | 2.39 | down | 7.40  | down | 1.09 | down | 2.75 | down | 15.42 | down | 5   |
| Os.5395.1.S1_at    | LOC_Os05g12260 | CAP1P1, putative, expressed                                                       | 1.19 | up   | 1.27 | down | 2.15  | down | 1.14 | down | 1.02 | down | 1.18  | down | ABA |
| Os.53968.1.S1_at   | LOC_Os02g56310 | calcium-dependent protein kinase isoform AK1, putative, expressed                 | 1.55 | up   | 3.70 | down | 4.11  | up   | 1.43 | up   | 3.59 | up   | 1.36  | down | 3   |
| Os.53973.1.S1_at   | LOC_Os02g50040 | endoglucanase, putative, expressed                                                | 1.04 | down | 1.24 | down | 2.06  | down | 1.01 | up   | 1.10 | down | 1.08  | up   | ABA |
| Os.53978.1.S1_at   | LOC_Os09g14880 | transposon protein, putative, Pong sub-class, expressed                           | 2.23 | down | 1.38 | down | 1.33  | down | 1.54 | up   | 1.33 | up   | 1.08  | down | IAA |
| Os.53987.1.S1_at   | LOC_Os06g08110 | nodulin, putative, expressed                                                      | 1.64 | up   | 1.12 | down | 3.15  | up   | 1.21 | down | 1.69 | up   | 1.04  | down | ABA |
| Os.53993.1.S1_x_at | LOC_Os02g27360 | aspartic proteinase-like protein 2 precursor, putative, expressed                 | 1.38 | up   | 1.26 | up   | 5.56  | up   | 1.35 | up   | 4.09 | up   | 1.41  | up   | 2   |
| Os.53996.1.S1_at   | AK101198       | Oryza sativa Japonica Group cDNA clone:J033030L06, full insert sequence.          | 1.01 | down | 1.01 | up   | 11.14 | up   | 1.00 | down | 1.00 | up   | 1.03  | up   | ABA |
| Os.5402.1.S1_at    | LOC_Os08g08110 | diacylglycerol kinase, putative, expressed                                        | 1.04 | down | 1.13 | down | 3.54  | down | 1.14 | down | 1.72 | down | 1.57  | down | ABA |
| Os.5403.1.S1_at    | AK062758       | Oryza sativa Japonica Group cDNA clone:001-106-G10, full insert sequence.         | 1.33 | up   | 1.00 | up   | 5.71  | up   | 1.31 | down | 1.01 | down | 1.17  | up   | ABA |
| Os.54033.1.S1_at   | LOC_Os08g37180 | patatin, putative, expressed                                                      | 1.06 | up   | 1.02 | down | 13.97 | up   | 1.01 | down | 1.77 | up   | 1.41  | down | ABA |
| Os.5406.1.S1_at    | LOC_Os03g58040 | glutamate dehydrogenase protein, putative, expressed                              | 1.20 | down | 1.02 | up   | 2.36  | down | 1.06 | up   | 1.46 | down | 1.94  | up   | ABA |
| Os.54066.1.S1_at   | LOC_Os02g33670 | expressed protein                                                                 | 5.61 | up   | 1.01 | down | 1.51  | up   | 1.14 | down | 1.06 | down | 1.30  | up   | IAA |
| Os.54079.1.S1_x_at | LOC_Os04g35880 | retrotransposon protein, putative, unclassified, expressed                        | 1.19 | up   | 1.01 | up   | 3.96  | up   | 1.13 | down | 1.01 | up   | 1.04  | down | ABA |
| Os.54080.1.S1_at   | LOC_Os05g37450 | starch binding domain containing protein, putative, expressed                     | 1.37 | down | 1.41 | down | 8.83  | up   | 1.25 | down | 1.18 | up   | 3.27  | up   | 2   |
| Os.54115.1.S1_at   | AK102037       | phosphoethanolamine N-methyltransferase 1                                         | 1.08 | down | 2.73 | up   | 10.19 | up   | 1.04 | up   | 1.01 | down | 1.03  | down | 2   |
| Os.54129.2.S1_x_at | LOC_Os03g06180 | expressed protein                                                                 | 1.01 | down | 1.01 | down | 19.03 | up   | 1.02 | up   | 1.00 | up   | 1.03  | up   | ABA |
| Os.54132.1.S1_at   | AK102094       | SNF2 domain-containing protein                                                    | 2.74 | down | 1.17 | down | 5.18  | down | 1.40 | down | 2.61 | down | 2.99  | down | 4   |
| Os.54145.2.S1_at   | LOC_Os04g57739 | expressed protein                                                                 | 1.70 | down | 1.18 | up   | 6.62  | up   | 1.18 | down | 1.19 | up   | 1.01  | down | ABA |
| Os.54156.1.S1_x_at | LOC_Os01g64750 | sterol 3-beta-glucosyltransferase, putative, expressed                            | 1.00 | down | 1.06 | up   | 4.31  | up   | 1.01 | up   | 1.32 | up   | 1.01  | up   | ABA |
| Os.54163.1.S1_at   | NM_001058191   | Oryza sativa (japonica cultivar-group) Os03g0809200 (Os03g0809200) mRNA, partial  | 1.13 | up   | 1.38 | down | 10.20 | up   | 1.00 | up   | 1.00 | up   | 1.02  | up   | ABA |
| Os.54165.1.S1_at   | LOC_Os04g56420 | retrotransposon protein, putative, unclassified, expressed                        | 6.73 | down | 1.32 | down | 14.53 | down | 1.00 | up   | 4.70 | down | 3.21  | down | 4   |
| Os.54171.1.S1_at   | LOC_Os11g03430 | CDC45B - Putative DNA replication initiation protein, expressed                   | 1.71 | down | 1.11 | down | 3.44  | down | 1.32 | down | 1.62 | down | 1.47  | down | ABA |
| Os.54184.1.S1_at   | LOC_Os09g30200 | ATP binding protein, putative, expressed                                          | 1.00 | down | 1.01 | up   | 8.06  | up   | 1.04 | up   | 1.03 | up   | 1.01  | up   | ABA |
| Os.54219.1.S1_at   | LOC_Os05g08970 | SSRP1-like FACT complex subunit, putative, expressed                              | 1.44 | up   | 1.02 | down | 3.69  | up   | 1.09 | down | 1.10 | up   | 1.46  | down | ABA |
| Os.54229.1.S1_at   | LOC_Os04g36670 | expressed protein                                                                 | 1.49 | up   | 1.05 | down | 1.59  | up   | 3.77 | up   | 2.14 | up   | 1.16  | up   | 2   |
| Os.54231.1.S1_at   | LOC_Os12g04010 | M-phase phosphoprotein 10, putative, expressed                                    | 1.18 | up   | 1.26 | up   | 2.12  | down | 1.06 | up   | 1.26 | down | 1.13  | down | ABA |
| Os.54251.1.S1_at   | LOC_Os07g39530 | BTBN16 - Bric-a-Brac, Tramtrack, Broad Complex BTB domain with non-phototropic hy | 1.05 | down | 1.07 | down | 2.48  | up   | 1.07 | down | 1.09 | up   | 1.02  | up   | ABA |
| Os.54256.1.S1_at   | LOC_Os04g56580 | inositol 1,3,4,5,6-pentakisphosphate 2-kinase, putative, expressed                | 1.29 | up   | 1.23 | up   | 3.19  | up   | 1.12 | up   | 1.15 | up   | 1.26  | down | ABA |
| Os.54267.1.S1_at   | LOC_Os05g14590 | MCM6 - Putative minichromosome maintenance MCM complex subunit 6, expressed       | 1.40 | down | 1.10 | down | 8.28  | down | 1.05 | down | 1.97 | down | 1.44  | down | ABA |
| Os.54269.1.S1_s_at | LOC_Os05g48060 | phosphatidylserine synthase, putative, expressed                                  | 1.27 | down | 1.11 | down | 2.84  | up   | 1.43 | up   | 1.24 | up   | 1.63  | up   | ABA |
| Os.54274.1.S1_at   | AK102976       | protein kinase family protein                                                     | 1.01 | up   | 2.65 | up   | 2.06  | up   | 1.35 | down | 1.52 | down | 1.24  | down | 2   |
| Os.54283.1.S1_at   | LOC_Os02g36990 | dynein light chain type 1 family protein, putative, expressed                     | 1.07 | down | 1.15 | down | 2.27  | down | 1.18 | up   | 1.04 | down | 1.10  | down | ABA |
| Os.54289.1.S1_x_at | LOC_Os06g10930 | xyloglucan fucosyltransferase, putative, expressed                                | 1.22 | down | 1.21 | down | 3.62  | down | 1.28 | up   | 1.52 | down | 1.66  | down | ABA |
| Os.54299.1.S1_at   | LOC_Os06g10880 | bZIP transcription factor, putative, expressed                                    | 1.05 | down | 1.06 | down | 5.03  | up   | 1.36 | down | 1.16 | up   | 1.22  | down | ABA |
| Os.54303.1.S1_at   | LOC_Os04g43300 | BRCA1 C Terminus domain containing protein, expressed                             | 1.49 | down | 1.12 | down | 4.96  | down | 1.16 | down | 1.99 | down | 1.97  | down | ABA |
| Os.54305.1.S1_at   | LOC_Os06g12610 | auxin efflux carrier component, putative, expressed                               | 3.26 | up   | 1.17 | down | 2.53  | down | 1.26 | up   | 1.34 | up   | 1.09  | up   | 2   |
| Os.54307.1.S1_at   | AK103229       | Oryza sativa Japonica Group cDNA clone:J033123D06, full insert sequence.          | 1.12 | down | 1.13 | down | 2.53  | down | 1.09 | up   | 1.02 | up   | 1.86  | down | ABA |

|                    |                |                                                                                       |      |      |       |      |        |      |      |      |      |      |      |      |     |
|--------------------|----------------|---------------------------------------------------------------------------------------|------|------|-------|------|--------|------|------|------|------|------|------|------|-----|
| Os.54324.1.S1_at   | LOC_Os08g33479 | expressed protein                                                                     | 1.27 | down | 1.25  | down | 7.82   | down | 1.21 | up   | 1.59 | up   | 1.14 | up   | ABA |
| Os.54328.1.S1_at   | LOC_Os12g02750 | expressed protein                                                                     | 1.03 | down | 2.49  | up   | 2.63   | down | 1.05 | down | 1.17 | up   | 1.21 | down | 2   |
| Os.5434.1.S1_at    | LOC_Os08g26850 | plant protein of unknown function domain containing protein, expressed                | 1.07 | up   | 1.83  | up   | 6.94   | down | 1.17 | up   | 1.87 | down | 1.19 | down | ABA |
| Os.54341.1.S1_at   | LOC_Os12g43720 | early-responsive to dehydration protein-related, putative, expressed                  | 1.02 | down | 1.83  | down | 13.47  | up   | 1.17 | down | 1.36 | up   | 1.08 | up   | ABA |
| Os.54349.1.S1_at   | LOC_Os04g48010 | WD-40 repeat family protein, putative, expressed                                      | 1.09 | down | 1.06  | up   | 2.74   | up   | 1.00 | down | 1.21 | up   | 1.30 | down | ABA |
| Os.54362.1.S1_at   | AK103663       | Oryza sativa Japonica Group cDNA clone:J033135I20, full insert sequence.              | 5.50 | down | 1.35  | up   | 1.62   | down | 4.74 | up   | 1.04 | up   | 1.51 | down | 2   |
| Os.54370.1.S1_at   | LOC_Os03g48750 | Cupin domain containing protein, expressed                                            | 1.00 | down | 1.68  | up   | 3.68   | up   | 1.61 | up   | 2.45 | up   | 1.46 | up   | 2   |
| Os.5438.1.S1_at    | LOC_Os10g14870 | heavy metal-associated domain containing protein, expressed                           | 1.32 | up   | 1.77  | down | 2.29   | up   | 1.63 | down | 1.45 | up   | 1.31 | down | ABA |
| Os.54394.1.S1_at   | LOC_Os02g52460 | zinc knuckle domain containing protein, expressed                                     | 1.23 | down | 1.14  | down | 2.83   | down | 1.13 | down | 1.30 | down | 1.10 | down | ABA |
| Os.54410.1.S1_at   | LOC_Os06g13720 | dehydrogenase E1 component domain containing protein, expressed                       | 1.31 | up   | 1.57  | down | 119.33 | up   | 1.17 | up   | 1.27 | up   | 1.06 | up   | ABA |
| Os.54415.1.S1_at   | LOC_Os04g50176 | expressed protein                                                                     | 1.02 | up   | 1.17  | up   | 2.64   | up   | 1.00 | down | 1.01 | down | 1.01 | up   | ABA |
| Os.54416.1.S1_at   | LOC_Os02g41450 | no apical meristem protein, putative                                                  | 1.05 | down | 2.79  | up   | 4.32   | up   | 1.00 | up   | 1.30 | down | 1.17 | down | 2   |
| Os.54420.1.S1_x_at | LOC_Os01g16980 | expressed protein                                                                     | 1.37 | down | 3.00  | up   | 1.01   | down | 1.09 | up   | 1.81 | down | 1.12 | down | BAP |
| Os.54425.1.S1_at   | LOC_Os05g46000 | ras-related protein, putative, expressed                                              | 1.14 | up   | 1.19  | down | 3.58   | up   | 1.28 | down | 1.16 | up   | 1.04 | up   | ABA |
| Os.54430.1.S1_at   | AK105148       | Oryza sativa Japonica Group cDNA clone:001-103-C06, full insert sequence.             | 1.07 | up   | 1.60  | up   | 2.58   | down | 1.21 | down | 1.33 | down | 1.15 | down | ABA |
| Os.54434.1.S1_at   | AK105158       | Oryza sativa Japonica Group cDNA clone:001-104-A05, full insert sequence.             | 1.25 | down | 1.73  | up   | 3.35   | down | 1.47 | down | 1.40 | down | 1.46 | down | ABA |
| Os.54438.1.S1_x_at | AK105163       | Oryza sativa (japonica cultivar-group) Os02g0828500 (Os02g0828500) mRNA, complete cds | 1.89 | down | 3.64  | up   | 2.38   | down | 1.09 | down | 1.31 | down | 1.31 | down | 2   |
| Os.54440.1.S1_at   | LOC_Os04g53180 | expressed protein                                                                     | 1.30 | up   | 1.01  | down | 2.95   | down | 1.38 | down | 1.19 | down | 1.18 | down | ABA |
| Os.54445.1.S1_at   | LOC_Os03g32314 | allene oxide cyclase 4, chloroplast precursor, putative, expressed                    | 2.34 | down | 1.02  | down | 1.25   | down | 1.23 | up   | 1.15 | down | 2.45 | up   | 2   |
| Os.54449.1.S1_at   | LOC_Os02g42880 | remorin C-terminal domain containing protein, putative, expressed                     | 1.67 | down | 1.54  | down | 1.69   | down | 1.26 | down | 1.11 | down | 2.27 | up   | JA  |
| Os.54453.1.S1_at   | LOC_Os08g44220 | GLTP domain containing protein, putative, expressed                                   | 1.18 | down | 1.12  | up   | 6.12   | down | 1.54 | up   | 1.02 | up   | 2.75 | down | 2   |
| Os.54462.1.S1_at   | LOC_Os05g41200 | OsCML9 - Calmodulin-related calcium sensor protein, expressed                         | 1.38 | down | 1.22  | down | 3.44   | up   | 1.18 | up   | 1.56 | up   | 1.03 | up   | ABA |
| Os.54467.1.S1_at   | LOC_Os03g21710 | WRKY45 transcription factor, putative, expressed                                      | 2.14 | down | 1.04  | down | 2.19   | down | 1.50 | down | 2.27 | up   | 1.68 | down | 3   |
| Os.54469.1.S1_at   | LOC_Os01g62610 | peptidyl-prolyl cis-trans isomerase, FKBP-type, putative, expressed                   | 1.12 | up   | 1.08  | up   | 22.62  | up   | 1.22 | down | 1.98 | up   | 1.23 | down | ABA |
| Os.54471.1.S1_at   | LOC_Os08g10630 | metal cation transporter, putative, expressed                                         | 1.62 | down | 1.40  | up   | 1.46   | up   | 2.10 | down | 1.28 | down | 1.47 | down | ACC |
| Os.54472.1.S1_at   | LOC_Os07g32060 | UDP-glucuronosyl/UDP-glucosyl transferase, putative, expressed                        | 1.19 | up   | 1.58  | up   | 2.89   | down | 1.40 | up   | 2.39 | down | 1.32 | down | 2   |
| Os.54481.2.S1_at   | LOC_Os04g49460 | protein kinase domain containing protein, expressed                                   | 1.30 | down | 1.12  | down | 5.37   | up   | 1.14 | up   | 3.01 | up   | 1.10 | up   | 2   |
| Os.54499.1.S1_at   | LOC_Os07g36110 | expressed protein                                                                     | 1.20 | down | 1.34  | down | 4.97   | up   | 1.01 | up   | 1.03 | down | 1.08 | down | ABA |
| Os.54509.1.S1_at   | LOC_Os09g19650 | 3-ketoacyl-CoA synthase precursor, putative, expressed                                | 1.18 | up   | 1.31  | up   | 4.79   | up   | 1.50 | down | 1.46 | up   | 2.94 | down | 2   |
| Os.5451.1.S1_at    | LOC_Os07g41360 | alpha-1,4-glucan-protein synthase, putative, expressed                                | 1.12 | down | 1.08  | down | 2.45   | down | 1.22 | down | 1.39 | down | 1.08 | down | ABA |
| Os.54510.1.S1_at   | LOC_Os07g44640 | ZOS7-13 - C2H2 zinc finger protein, expressed                                         | 1.48 | up   | 1.37  | up   | 2.81   | down | 1.24 | up   | 1.15 | down | 1.31 | down | ABA |
| Os.54511.1.S1_at   | LOC_Os11g08380 | 1-aminocyclopropane-1-carboxylate oxidase, putative, expressed                        | 1.53 | up   | 1.26  | down | 1.78   | up   | 1.21 | down | 1.79 | up   | 6.48 | down | JA  |
| Os.54531.1.S1_at   | LOC_Os06g29460 | expressed protein                                                                     | 1.07 | up   | 1.06  | up   | 4.05   | up   | 1.03 | up   | 1.10 | up   | 1.03 | up   | ABA |
| Os.54535.1.S1_at   | AK105541       | Putative clathrin assembly protein                                                    | 1.09 | down | 1.63  | up   | 7.80   | up   | 1.13 | up   | 1.02 | down | 1.58 | down | ABA |
| Os.54545.1.S1_at   | LOC_Os07g41060 | dihydroflavonol-4-reductase, putative, expressed                                      | 1.90 | down | 1.16  | up   | 2.49   | down | 3.47 | down | 1.21 | up   | 2.91 | up   | 3   |
| Os.54548.1.S1_at   | LOC_Os02g54560 | SCP-like extracellular protein, expressed                                             | 1.30 | down | 1.15  | up   | 7.76   | down | 1.11 | up   | 2.99 | down | 3.32 | down | 3   |
| Os.54548.1.S1_x_at | LOC_Os02g54560 | SCP-like extracellular protein, expressed                                             | 1.36 | down | 1.11  | up   | 7.79   | down | 1.01 | down | 3.16 | down | 3.07 | down | 3   |
| Os.54566.1.S1_at   | LOC_Os02g35940 | gibberellin receptor GID1L2, putative, expressed                                      | 1.16 | down | 1.02  | up   | 2.35   | up   | 1.49 | up   | 2.98 | up   | 2.09 | up   | 3   |
| Os.54569.1.S1_x_at | LOC_Os06g43090 | MYB transcription factor TaMYB1, putative, expressed                                  | 1.26 | up   | 1.07  | down | 2.80   | up   | 1.18 | up   | 1.24 | up   | 1.26 | up   | ABA |
| Os.54579.1.S1_s_at | LOC_Os07g23640 | retrotransposon protein, putative, Ty3-gypsy subclass, expressed                      | 1.23 | down | 1.12  | down | 2.90   | up   | 1.10 | down | 1.30 | up   | 1.55 | up   | ABA |
| Os.54579.1.S1_x_at | LOC_Os07g23660 | retrotransposon protein, putative, unclassified, expressed                            | 1.08 | down | 1.15  | down | 2.46   | up   | 1.04 | down | 1.23 | up   | 1.95 | up   | ABA |
| Os.54597.1.S1_x_at | LOC_Os12g15520 | expressed protein                                                                     | 1.37 | up   | 1.11  | up   | 2.11   | up   | 1.00 | up   | 1.28 | up   | 1.10 | down | ABA |
| Os.54614.1.S1_at   | LOC_Os06g05320 | transferase family protein, putative, expressed                                       | 1.34 | down | 1.42  | down | 3.40   | up   | 1.29 | down | 1.31 | up   | 1.03 | up   | ABA |
| Os.54615.1.S1_at   | LOC_Os06g18140 | UDP-glucuronosyl and UDP-glucosyl transferase domain containing protein, expressed    | 2.71 | up   | 1.14  | up   | 15.67  | up   | 1.64 | down | 5.84 | up   | 1.76 | up   | 3   |
| Os.54617.1.S1_at   | LOC_Os03g20460 | guanylate kinase, putative, expressed                                                 | 1.11 | down | 1.10  | up   | 2.65   | down | 1.24 | up   | 1.66 | down | 1.16 | down | ABA |
| Os.54625.1.S1_at   | LOC_Os12g42020 | AGC_PVPK_like_kin82y.20 - ACG kinases include homologs to PKA, PKG and PKC, e         | 3.30 | up   | 1.29  | down | 2.28   | down | 1.25 | up   | 1.12 | up   | 1.02 | up   | 2   |
| Os.54630.1.S1_at   | LOC_Os03g08700 | expressed protein                                                                     | 1.29 | up   | 1.10  | up   | 2.23   | up   | 1.24 | up   | 1.44 | up   | 1.38 | up   | ABA |
| Os.54665.1.S1_at   | LOC_Os03g47190 | expressed protein                                                                     | 1.03 | down | 1.11  | down | 2.26   | down | 1.10 | down | 1.22 | down | 1.16 | down | ABA |
| Os.54667.1.S1_at   | LOC_Os04g44280 | OsRR5 type-A response regulator, expressed                                            | 1.01 | down | 12.77 | up   | 1.02   | down | 1.00 | up   | 1.00 | down | 1.01 | up   | BAP |
| Os.5467.1.S1_at    | LOC_Os04g43990 | DUF584 domain containing protein, putative, expressed                                 | 1.29 | up   | 1.55  | down | 4.58   | up   | 1.03 | up   | 1.47 | up   | 1.53 | down | ABA |
| Os.5469.1.S1_at    | LOC_Os05g38264 | expressed protein                                                                     | 1.29 | down | 1.08  | up   | 1.21   | down | 1.21 | down | 2.69 | up   | 1.68 | down | 2   |
| Os.54734.1.S1_at   | LOC_Os06g09220 | cytochrome P450 72A1, putative, expressed                                             | 1.12 | down | 1.83  | down | 2.30   | down | 1.18 | down | 1.82 | up   | 2.65 | up   | 2   |
| Os.54736.1.S1_at   | LOC_Os02g52910 | zinc finger protein, putative, expressed                                              | 1.13 | down | 1.20  | down | 22.38  | up   | 1.01 | up   | 2.25 | up   | 1.06 | down | 2   |
| Os.5476.1.S1_at    | LOC_Os05g32630 | mitochondrial carrier protein, putative, expressed                                    | 1.06 | up   | 1.03  | down | 2.54   | up   | 1.24 | up   | 1.81 | up   | 1.56 | up   | ABA |
| Os.54760.1.S1_at   | LOC_Os05g49840 | phospholipase, putative, expressed                                                    | 1.02 | down | 1.24  | down | 2.39   | up   | 1.18 | up   | 1.03 | down | 1.97 | down | ABA |

|                  |                |                                                                                             |       |      |      |      |        |      |      |      |      |      |       |      |     |
|------------------|----------------|---------------------------------------------------------------------------------------------|-------|------|------|------|--------|------|------|------|------|------|-------|------|-----|
| Os.54769.1.S1_at | AK106724       | Oryza sativa Japonica Group cDNA clone:002-114-G11, full insert sequence.                   | 3.14  | up   | 1.40 | down | 5.49   | up   | 1.05 | up   | 2.51 | up   | 1.72  | up   | 3   |
| Os.5477.1.S1_at  | LOC_Os03g11320 | heparanase-like protein precursor, putative, expressed                                      | 1.11  | up   | 1.08 | down | 2.04   | up   | 1.20 | down | 1.11 | down | 1.21  | up   | ABA |
| Os.54770.1.S1_at | LOC_Os02g03120 | endoglucanase, putative, expressed                                                          | 1.48  | up   | 1.63 | down | 18.52  | down | 1.24 | up   | 1.31 | down | 1.29  | up   | ABA |
| Os.54781.1.S1_at | LOC_Os07g39220 | BES1/BZR1 homolog protein, putative, expressed                                              | 1.10  | up   | 1.03 | up   | 2.48   | down | 1.24 | up   | 1.20 | down | 1.04  | down | ABA |
| Os.54786.1.S1_at | LOC_Os08g34360 | AP2 domain containing protein, expressed                                                    | 1.17  | down | 1.03 | down | 2.98   | up   | 1.01 | up   | 1.01 | down | 1.01  | down | ABA |
| Os.54791.1.S1_at | LOC_Os02g53000 | lysM domain-containing GPI-anchored protein precursor, putative, expressed                  | 1.08  | up   | 1.16 | down | 1.92   | down | 1.43 | down | 2.00 | down | 1.23  | down | SA  |
| Os.54801.1.A1_at | LOC_Os12g06464 | expressed protein                                                                           | 1.07  | up   | 1.21 | up   | 2.24   | up   | 1.43 | down | 1.04 | down | 1.57  | down | ABA |
| Os.54806.1.S1_at | LOC_Os01g03230 | retrotransposon protein, putative, unclassified, expressed                                  | 1.35  | down | 1.18 | down | 2.06   | down | 1.09 | up   | 1.17 | down | 1.22  | down | ABA |
| Os.54825.1.S1_at | LOC_Os05g33080 | serine/threonine-protein kinase, putative, expressed                                        | 1.03  | down | 1.17 | down | 2.47   | down | 1.50 | up   | 1.06 | down | 1.01  | down | ABA |
| Os.54829.1.S1_at | LOC_Os08g02220 | endoglucanase, putative, expressed                                                          | 1.44  | up   | 1.22 | down | 3.10   | down | 1.00 | up   | 1.03 | up   | 1.07  | up   | ABA |
| Os.54841.1.S1_at | LOC_Os05g50920 | transmembrane amino acid transporter protein, putative, expressed                           | 1.26  | up   | 1.24 | down | 3.28   | up   | 1.04 | down | 1.08 | up   | 1.52  | down | ABA |
| Os.54853.1.S1_at | AK106908       | Oryza sativa Japonica Group cDNA clone:002-119-A04, full insert sequence.                   | 1.74  | down | 1.08 | up   | 4.99   | down | 1.35 | down | 1.57 | down | 1.27  | up   | ABA |
| Os.54859.1.S1_at | LOC_Os04g49550 | RING-H2 finger protein ATL2A, putative, expressed                                           | 1.06  | up   | 1.68 | up   | 1.38   | up   | 1.17 | up   | 1.31 | down | 3.04  | up   | JA  |
| Os.5486.1.S1_at  | LOC_Os08g16050 | tetraspanin family protein, putative, expressed                                             | 1.60  | down | 1.21 | down | 13.01  | down | 1.24 | up   | 1.48 | down | 1.12  | down | ABA |
| Os.54869.1.S1_at | LOC_Os06g47910 | GDSL-like lipase/acylhydrolase, putative, expressed                                         | 2.10  | down | 9.26 | up   | 7.36   | down | 1.25 | down | 3.09 | down | 2.82  | down | 5   |
| Os.54904.1.S1_at | LOC_Os02g45010 | ethylene-responsive protein related, putative, expressed                                    | 1.10  | up   | 2.70 | down | 2.04   | down | 1.37 | down | 1.14 | down | 1.45  | down | 2   |
| Os.54927.1.S1_at | LOC_Os08g44590 | gibberellin 20 oxidase 2, putative, expressed                                               | 1.01  | down | 1.15 | up   | 2.87   | up   | 1.83 | up   | 1.30 | up   | 1.29  | up   | ABA |
| Os.54928.1.S1_at | LOC_Os01g59680 | NHL25, putative, expressed                                                                  | 1.34  | down | 2.16 | up   | 1.09   | down | 1.18 | down | 1.13 | up   | 1.38  | up   | BAP |
| Os.54932.1.S1_at | LOC_Os12g07030 | expressed protein                                                                           | 1.87  | up   | 1.90 | down | 11.68  | up   | 1.74 | up   | 6.97 | down | 12.51 | up   | 3   |
| Os.54934.1.S1_at | LOC_Os05g37060 | MYB family transcription factor, putative, expressed                                        | 1.73  | down | 1.97 | up   | 1.98   | down | 3.30 | up   | 1.35 | up   | 7.43  | up   | 2   |
| Os.5495.1.S1_at  | LOC_Os04g37710 | serine hydrolase domain containing protein, expressed                                       | 1.69  | up   | 1.12 | down | 1.79   | up   | 1.11 | up   | 3.25 | up   | 1.92  | up   | SA  |
| Os.54950.1.S1_at | LOC_Os03g11950 | SEC14 cytosolic factor family protein, putative, expressed                                  | 1.45  | up   | 1.46 | down | 4.81   | down | 1.16 | down | 1.45 | down | 2.56  | down | 2   |
| Os.54959.1.S1_at | LOC_Os03g46860 | helix-loop-helix DNA-binding protein, putative, expressed                                   | 1.52  | down | 4.76 | up   | 1.81   | down | 1.56 | down | 1.23 | down | 4.56  | up   | 2   |
| Os.54967.1.S1_at | NM_001062571   | Oryza sativa (japonica cultivar-group) Os05g0514600 (Os05g0514600) mRNA, complete cds       | 3.03  | down | 2.17 | up   | 2.72   | up   | 3.88 | up   | 2.08 | down | 10.46 | up   | 6   |
| Os.54977.1.S1_at | LOC_Os02g37960 | expressed protein                                                                           | 1.21  | up   | 1.06 | down | 2.44   | up   | 1.01 | up   | 1.01 | up   | 1.10  | down | ABA |
| Os.54992.1.S1_at | LOC_Os08g02640 | succinate dehydrogenase iron-sulfur subunit 2, mitochondrial precursor, putative, expressed | 1.27  | up   | 1.11 | down | 1.16   | up   | 1.17 | up   | 2.03 | up   | 1.12  | up   | SA  |
| Os.54991.1.S1_at | LOC_Os04g32070 | dehydrogenase/reductase, putative, expressed                                                | 1.00  | down | 1.00 | up   | 13.02  | up   | 1.01 | up   | 1.01 | up   | 1.01  | up   | ABA |
| Os.54997.1.S1_at | LOC_Os03g51350 | expressed protein                                                                           | 1.12  | up   | 1.08 | up   | 209.00 | up   | 1.19 | down | 1.09 | up   | 1.21  | down | ABA |
| Os.55010.1.S1_at | LOC_Os08g14400 | homeobox domain containing protein, expressed                                               | 26.82 | up   | 1.07 | down | 1.13   | up   | 1.00 | up   | 1.00 | down | 1.02  | up   | IAA |
| Os.55040.1.S1_at | LOC_Os04g59120 | auxin-induced protein 5NG4, putative, expressed                                             | 1.22  | down | 1.12 | up   | 4.97   | down | 1.15 | up   | 2.66 | down | 5.46  | up   | 3   |
| Os.55059.1.S1_at | LOC_Os03g53540 | expressed protein                                                                           | 4.77  | up   | 4.17 | up   | 1.06   | up   | 1.03 | up   | 1.13 | up   | 1.30  | up   | 2   |
| Os.55065.1.S1_at | LOC_Os06g04540 | DNA binding protein, putative, expressed                                                    | 1.10  | up   | 1.12 | down | 2.75   | up   | 1.03 | down | 1.29 | up   | 1.94  | down | ABA |
| Os.55079.1.S1_at | NM_001049605   | Oryza sativa (japonica cultivar-group) Os01g0373800 (Os01g0373800) mRNA, complete cds       | 3.94  | up   | 5.99 | up   | 1.29   | up   | 1.08 | down | 1.44 | up   | 1.20  | up   | 2   |
| Os.55088.1.S1_at | LOC_Os01g16810 | MYB family transcription factor, putative, expressed                                        | 1.84  | up   | 1.07 | up   | 1.49   | up   | 1.36 | up   | 2.91 | up   | 2.11  | up   | 2   |
| Os.55090.1.S1_at | AK107467       | allergen V5/Tpx-1-related family protein                                                    | 1.62  | down | 1.53 | down | 7.44   | down | 1.28 | down | 1.12 | down | 1.28  | down | ABA |
| Os.55093.1.S1_at | LOC_Os03g04370 | protein-methionine-S-oxide reductase, putative, expressed                                   | 1.02  | up   | 1.05 | up   | 2.57   | up   | 1.08 | up   | 1.36 | up   | 1.04  | up   | ABA |
| Os.55096.1.S1_at | LOC_Os06g14670 | ODORANT1, putative, expressed                                                               | 1.00  | down | 1.32 | down | 14.68  | up   | 1.00 | down | 1.00 | down | 1.02  | up   | ABA |
| Os.551.1.S1_at   | LOC_Os01g08110 | flavonol-3-O-glycoside-7-O-glucosyltransferase 1, putative, expressed                       | 1.14  | up   | 1.19 | up   | 2.10   | up   | 1.22 | up   | 2.02 | up   | 1.60  | up   | 2   |
| Os.55100.1.S1_at | LOC_Os07g40830 | app1, putative, expressed                                                                   | 1.84  | up   | 1.00 | up   | 38.62  | up   | 1.05 | down | 1.57 | up   | 1.08  | up   | ABA |
| Os.55109.1.S1_at | LOC_Os04g57490 | cysteine protease, putative, expressed                                                      | 1.01  | up   | 1.11 | up   | 2.18   | up   | 1.04 | up   | 1.02 | up   | 1.03  | up   | ABA |
| Os.55120.1.S1_at | LOC_Os04g52550 | PAZ domain-containing protein, putative, expressed                                          | 1.02  | up   | 1.02 | up   | 2.90   | up   | 1.02 | up   | 1.06 | up   | 1.01  | up   | ABA |
| Os.55132.1.S1_at | LOC_Os03g26990 | VQ domain containing protein, putative, expressed                                           | 1.10  | up   | 1.01 | up   | 2.99   | up   | 1.00 | up   | 1.01 | down | 1.02  | up   | ABA |
| Os.55139.1.S1_at | LOC_Os11g04380 | domain of unknown function, DUF250 domain containing protein, expressed                     | 2.30  | down | 1.47 | down | 9.14   | down | 1.21 | down | 2.30 | down | 1.86  | down | 3   |
| Os.55146.1.S1_at | LOC_Os09g26940 | cytochrome P450, putative, expressed                                                        | 1.01  | down | 1.40 | up   | 1.09   | down | 1.00 | up   | 1.04 | down | 5.41  | up   | JA  |
| Os.55197.1.S1_at | LOC_Os06g23350 | late embryogenesis abundant protein D-34, putative, expressed                               | 1.26  | down | 1.04 | up   | 304.85 | up   | 1.37 | up   | 1.00 | up   | 1.26  | up   | ABA |
| Os.55208.1.S1_at | LOC_Os11g04860 | anthocyanin 5-O-glucosyltransferase, putative, expressed                                    | 1.05  | down | 1.25 | up   | 2.27   | down | 1.33 | up   | 2.56 | up   | 1.44  | up   | 2   |
| Os.55213.1.S1_at | LOC_Os09g24350 | THION32 - Plant thionin family protein precursor, expressed                                 | 1.26  | up   | 1.35 | up   | 3.93   | up   | 1.17 | down | 1.32 | down | 1.07  | down | ABA |
| Os.55224.1.S1_at | LOC_Os12g14220 | expressed protein                                                                           | 1.97  | up   | 1.30 | up   | 2.59   | down | 1.57 | down | 1.05 | down | 3.28  | down | 3   |
| Os.55227.1.S1_at | AK107694       | Oryza sativa Japonica Group cDNA clone:002-132-C03, full insert sequence.                   | 1.01  | down | 1.00 | up   | 67.52  | up   | 1.00 | up   | 1.00 | up   | 1.01  | up   | ABA |
| Os.55236.1.S1_at | LOC_Os02g37970 | DUF581 domain containing protein, expressed                                                 | 2.16  | up   | 1.54 | down | 7.48   | up   | 1.18 | down | 1.65 | up   | 4.28  | down | 3   |
| Os.55249.1.S1_at | AK107736       | Oryza sativa Japonica Group cDNA clone:002-132-G03, full insert sequence.                   | 1.26  | down | 1.98 | up   | 2.48   | up   | 1.10 | up   | 1.03 | down | 1.44  | down | ABA |
| Os.55252.1.S1_at | LOC_Os04g49260 | heavy metal-associated domain containing protein, expressed                                 | 7.48  | up   | 3.07 | up   | 2.46   | up   | 1.24 | down | 1.31 | down | 2.77  | down | 4   |
| Os.55256.1.S1_at | NM_001071343   | Oryza sativa (japonica cultivar-group) Os10g0467000 (Os10g0467000) mRNA, complete cds       | 1.98  | up   | 2.24 | up   | 1.04   | up   | 1.25 | down | 1.60 | down | 1.62  | down | BAP |
| Os.55259.1.S1_at | LOC_Os04g32480 | zinc-finger protein, putative, expressed                                                    | 1.15  | down | 3.51 | up   | 1.72   | down | 1.24 | up   | 1.51 | up   | 68.18 | up   | 2   |
| Os.55263.1.S1_at | LOC_Os08g29600 | seed maturation protein PM41, putative, expressed                                           | 1.12  | up   | 1.22 | down | 162.31 | up   | 1.07 | up   | 1.80 | up   | 1.17  | up   | ABA |

|                    |                |                                                                                      |      |      |       |      |        |      |      |      |      |      |       |      |     |
|--------------------|----------------|--------------------------------------------------------------------------------------|------|------|-------|------|--------|------|------|------|------|------|-------|------|-----|
| Os.55272.1.S1_at   | LOC_Os01g03130 | expressed protein                                                                    | 1.01 | down | 1.80  | up   | 4.51   | up   | 1.23 | down | 2.94 | up   | 5.18  | down | 3   |
| Os.55273.1.S1_at   | NM_001059309   | Oryza sativa (japonica cultivar-group) Os04g0419100 (Os04g0419100) mRNA, partial     | 1.20 | down | 1.93  | up   | 4.55   | down | 2.56 | up   | 4.46 | up   | 2.09  | up   | 4   |
| Os.55281.1.S1_at   | NM_001068759   | Oryza sativa (japonica cultivar-group) Os08g0513100 (Os08g0513100) mRNA, partial     | 1.20 | down | 1.04  | up   | 2.70   | up   | 1.05 | up   | 1.20 | up   | 1.00  | up   | ABA |
| Os.55283.1.S1_at   | LOC_Os05g38660 | expressed protein                                                                    | 1.08 | up   | 1.22  | up   | 5.29   | up   | 1.18 | down | 1.19 | up   | 1.05  | up   | ABA |
| Os.55285.1.S1_at   | LOC_Os06g40870 | expressed protein                                                                    | 1.05 | up   | 1.02  | down | 1.06   | up   | 1.16 | down | 2.46 | down | 1.67  | down | SA  |
| Os.55286.1.S1_at   | LOC_Os07g47760 | POEI50 - Pollen Ole e l allergen and extensin family protein precursor, expressed    | 1.11 | down | 1.89  | down | 14.11  | down | 1.03 | up   | 1.07 | up   | 1.01  | down | ABA |
| Os.55293.1.S1_at   | LOC_Os06g05510 | expressed protein                                                                    | 1.20 | up   | 1.14  | down | 1.65   | down | 1.04 | up   | 5.07 | up   | 1.02  | down | SA  |
| Os.55297.1.S1_at   | AK107821       | Oryza sativa Japonica Group cDNA clone:002-133-G01, full insert sequence.            | 1.08 | up   | 1.10  | down | 1.24   | down | 1.02 | up   | 2.77 | up   | 1.21  | down | SA  |
| Os.55299.1.S1_at   | LOC_Os04g43310 | expressed protein                                                                    | 1.34 | down | 1.22  | down | 2.87   | up   | 1.04 | up   | 1.02 | down | 1.11  | up   | ABA |
| Os.55303.1.S1_at   | NM_001052163   | Oryza sativa (japonica cultivar-group) Os02g0106600 (Os02g0106600) mRNA, comple      | 1.11 | down | 1.19  | up   | 3.37   | up   | 1.20 | up   | 1.18 | up   | 1.34  | down | ABA |
| Os.55306.1.S1_at   | LOC_Os09g27330 | oxidoreductase/ transition metal ion binding protein, putative, expressed            | 1.18 | up   | 1.94  | down | 14.88  | up   | 1.13 | up   | 1.92 | up   | 1.47  | down | ABA |
| Os.55321.1.S1_at   | LOC_Os08g08090 | wound induced protein, putative, expressed                                           | 3.20 | down | 1.67  | up   | 1.06   | down | 1.06 | down | 1.01 | down | 1.03  | up   | IAA |
| Os.55332.1.S1_at   | LOC_Os09g04100 | expressed protein                                                                    | 1.02 | down | 1.01  | down | 334.11 | up   | 1.00 | up   | 1.18 | up   | 1.08  | up   | ABA |
| Os.55338.1.S1_at   | NM_001054714   | Oryza sativa (japonica cultivar-group) Os02g0759000 (Os02g0759000) mRNA, comple      | 1.79 | down | 3.37  | up   | 1.87   | up   | 1.59 | up   | 1.21 | up   | 1.29  | down | BAP |
| Os.55358.1.S1_at   | LOC_Os04g56680 | OsSAUR22 - Auxin-responsive SAUR gene family member, expressed                       | 1.07 | down | 1.34  | up   | 2.39   | down | 1.09 | up   | 1.07 | down | 1.27  | down | ABA |
| Os.55360.1.S1_at   | LOC_Os02g50710 | expressed protein                                                                    | 1.38 | down | 1.35  | up   | 3.00   | up   | 1.22 | down | 2.40 | up   | 1.31  | down | 2   |
| Os.55363.1.S1_at   | LOC_Os07g40250 | sex determination protein tasselseed-2, putative, expressed                          | 1.78 | down | 2.31  | down | 4.06   | up   | 1.25 | down | 1.10 | up   | 3.76  | up   | 3   |
| Os.55364.1.S1_at   | LOC_Os12g13940 | DNA-binding storekeeper protein-related, putative, expressed                         | 1.38 | up   | 1.02  | down | 5.41   | up   | 1.37 | down | 1.33 | up   | 1.62  | down | ABA |
| Os.55368.1.S1_at   | LOC_Os05g05290 | expressed protein                                                                    | 1.30 | down | 1.27  | up   | 1.18   | down | 1.03 | down | 1.10 | up   | 3.44  | up   | JA  |
| Os.55372.1.S1_at   | AK107964       | Oryza sativa Japonica Group cDNA clone:002-135-C12, full insert sequence.            | 1.46 | down | 1.18  | down | 2.39   | up   | 1.42 | up   | 1.70 | up   | 2.06  | up   | 2   |
| Os.55372.1.S1_x_at | AK107964       | Oryza sativa Japonica Group cDNA clone:002-135-C12, full insert sequence.            | 1.16 | down | 1.04  | down | 2.40   | up   | 1.27 | up   | 1.46 | up   | 1.79  | up   | ABA |
| Os.55378.1.S1_at   | LOC_Os09g34890 | expressed protein                                                                    | 1.11 | up   | 1.72  | down | 2.61   | up   | 1.11 | up   | 1.33 | up   | 1.06  | up   | ABA |
| Os.55380.1.S1_at   | LOC_Os06g46740 | early nodulin 20 precursor, putative, expressed                                      | 1.14 | up   | 1.21  | up   | 36.14  | up   | 1.18 | down | 1.13 | up   | 1.10  | up   | ABA |
| Os.55385.1.S1_at   | LOC_Os01g15970 | expressed protein                                                                    | 1.33 | down | 1.27  | down | 2.55   | down | 1.15 | down | 1.31 | down | 1.82  | down | ABA |
| Os.55388.1.S1_at   | LOC_Os04g36600 | DUF538 domain containing protein, putative, expressed                                | 1.00 | up   | 1.32  | up   | 3.31   | up   | 1.02 | up   | 1.26 | up   | 1.06  | down | ABA |
| Os.55402.1.S1_at   | LOC_Os11g43520 | OsGrx_C17 - glutaredoxin subgroup III, expressed                                     | 2.09 | down | 2.35  | up   | 5.97   | down | 1.81 | up   | 6.30 | down | 3.65  | down | 5   |
| Os.55417.1.S1_at   | LOC_Os08g15420 | CSLC3 - cellulose synthase-like family C, expressed                                  | 2.18 | down | 1.60  | down | 2.23   | down | 1.29 | down | 1.24 | down | 1.43  | down | 2   |
| Os.55437.1.S1_at   | LOC_Os03g43770 | OsFBX97 - F-box domain containing protein, expressed                                 | 1.42 | up   | 1.30  | up   | 1.43   | down | 1.02 | up   | 1.51 | up   | 2.70  | up   | JA  |
| Os.55438.1.S1_at   | AK108095       | Oryza sativa Japonica Group cDNA clone:002-139-A07, full insert sequence.            | 1.17 | up   | 1.19  | up   | 4.53   | up   | 1.23 | down | 1.03 | up   | 1.25  | down | ABA |
| Os.55447.1.S1_at   | LOC_Os02g40440 | GDSL-like lipase/acylhydrolase, putative, expressed                                  | 1.06 | down | 1.05  | down | 3.69   | down | 1.53 | up   | 1.11 | up   | 1.05  | down | ABA |
| Os.55448.1.S1_at   | LOC_Os02g11870 | expressed protein                                                                    | 1.04 | down | 1.04  | down | 6.08   | up   | 1.01 | up   | 1.01 | up   | 1.12  | up   | ABA |
| Os.55453.1.S1_at   | LOC_Os04g44570 | aquaporin protein, putative, expressed                                               | 1.30 | down | 1.13  | down | 62.87  | up   | 1.04 | up   | 1.05 | up   | 1.02  | down | ABA |
| Os.55455.1.S1_at   | LOC_Os04g45370 | OsSAUR19 - Auxin-responsive SAUR gene family member, expressed                       | 2.53 | up   | 1.08  | down | 1.09   | up   | 1.56 | down | 1.01 | up   | 1.42  | down | IAA |
| Os.55459.1.S1_at   | LOC_Os03g57990 | LTPL74 - Protease inhibitor/seed storage/LTP family protein precursor, expressed     | 1.03 | down | 1.15  | up   | 5.86   | up   | 1.19 | down | 1.45 | up   | 1.10  | up   | ABA |
| Os.55461.1.S1_at   | LOC_Os03g26490 | expressed protein                                                                    | 1.03 | up   | 1.01  | up   | 75.27  | up   | 1.00 | up   | 1.19 | up   | 1.03  | up   | ABA |
| Os.55469.1.S1_s_at | LOC_Os08g06090 | zinc finger, C3HC4 type domain containing protein, expressed                         | 1.32 | up   | 1.34  | down | 2.74   | down | 1.11 | down | 1.06 | up   | 1.39  | up   | ABA |
| Os.55479.1.S1_at   | LOC_Os05g41490 | circadian clock coupling factor ZGT, putative, expressed                             | 4.98 | up   | 1.50  | down | 159.64 | up   | 1.94 | down | 2.38 | up   | 1.02  | down | 3   |
| Os.5549.1.S1_at    | LOC_Os07g12340 | NAC domain-containing protein 67, putative, expressed                                | 4.20 | up   | 1.36  | up   | 1.02   | down | 1.38 | up   | 2.61 | up   | 2.06  | up   | 3   |
| Os.55509.1.S1_at   | LOC_Os08g34240 | CAMK_KIN1/SNF1/Nim1_like.33 - CAMK includes calcium/calmodulin dependet protein      | 1.04 | up   | 1.10  | down | 3.54   | up   | 1.12 | up   | 1.56 | up   | 1.33  | up   | ABA |
| Os.5551.1.S1_at    | LOC_Os04g55720 | D-3-phosphoglycerate dehydrogenase, chloroplast precursor, putative, expressed       | 1.35 | up   | 1.08  | up   | 1.41   | down | 1.63 | up   | 2.39 | up   | 1.84  | up   | SA  |
| Os.55512.1.S1_at   | LOC_Os11g25700 | tropinone reductase, putative, expressed                                             | 1.33 | down | 1.30  | down | 1.09   | up   | 2.30 | up   | 1.54 | down | 28.93 | up   | 2   |
| Os.55519.1.S1_at   | LOC_Os02g09990 | expressed protein                                                                    | 1.89 | up   | 1.44  | up   | 1.06   | down | 1.26 | down | 1.40 | up   | 2.47  | down | JA  |
| Os.55527.1.S1_at   | LOC_Os08g31340 | heavy metal-associated domain containing protein, expressed                          | 1.65 | down | 1.19  | up   | 5.30   | up   | 1.08 | down | 1.39 | down | 1.47  | down | ABA |
| Os.55531.1.S1_at   | LOC_Os03g32420 | expressed protein                                                                    | 1.21 | up   | 1.01  | down | 4.69   | up   | 1.11 | up   | 1.94 | up   | 2.02  | up   | 2   |
| Os.55539.1.S1_at   | LOC_Os03g53690 | oxidoreductase, short chain dehydrogenase/reductase family domain containing protein | 1.11 | down | 1.35  | up   | 6.32   | down | 1.13 | up   | 1.42 | down | 1.47  | up   | ABA |
| Os.55561.1.S1_at   | LOC_Os07g39960 | ZOS7-07 - C2H2 zinc finger protein                                                   | 1.05 | down | 1.07  | down | 19.11  | up   | 1.00 | down | 1.00 | up   | 1.01  | up   | ABA |
| Os.55564.1.S1_at   | LOC_Os02g06410 | CBS domain containing membrane protein, putative, expressed                          | 1.01 | up   | 1.00  | down | 880.48 | up   | 1.00 | up   | 1.23 | up   | 1.03  | up   | ABA |
| Os.55575.1.S1_at   | LOC_Os05g02200 | cysteine-rich repeat secretory protein 55 precursor, putative, expressed             | 1.75 | down | 1.08  | down | 2.65   | up   | 1.02 | up   | 1.27 | up   | 1.22  | up   | ABA |
| Os.55579.1.S1_at   | NM_001063516   | Oryza sativa (japonica cultivar-group) Os06g0181700 (Os06g0181700) mRNA, comple      | 2.31 | up   | 11.69 | up   | 1.14   | down | 1.32 | up   | 1.08 | down | 1.03  | up   | 2   |
| Os.55583.1.S1_at   | LOC_Os09g38110 | RING-H2 finger protein, putative, expressed                                          | 1.09 | up   | 1.01  | down | 2.21   | up   | 1.09 | up   | 1.02 | down | 1.01  | down | ABA |
| Os.55583.1.S1_x_at | LOC_Os09g38110 | RING-H2 finger protein, putative, expressed                                          | 1.04 | up   | 1.01  | up   | 2.32   | up   | 1.11 | up   | 1.00 | down | 1.01  | up   | ABA |
| Os.55585.1.S1_at   | AK108363       | DNA-binding family protein / AT-hook protein 1 (AHP1)                                | 1.07 | down | 1.05  | down | 3.65   | up   | 1.10 | up   | 1.15 | up   | 1.19  | up   | ABA |
| Os.55595.1.S1_at   | LOC_Os11g02100 | peroxidase precursor, putative, expressed                                            | 2.00 | down | 7.61  | up   | 7.21   | down | 1.17 | down | 4.83 | up   | 1.38  | down | 4   |
| Os.5560.1.S1_at    | LOC_Os01g62870 | oxidoreductase, aldo/keto reductase family protein, putative, expressed              | 2.22 | up   | 1.19  | down | 1.51   | up   | 1.10 | up   | 1.51 | up   | 2.20  | up   | 2   |
| Os.55612.1.S1_at   | LOC_Os03g18600 | cyclase/dehydrase family protein, putative, expressed                                | 3.50 | down | 1.11  | up   | 39.46  | down | 1.54 | up   | 1.82 | down | 1.43  | down | 2   |

|                    |                |                                                                                       |      |      |      |      |       |      |      |      |       |      |       |      |     |
|--------------------|----------------|---------------------------------------------------------------------------------------|------|------|------|------|-------|------|------|------|-------|------|-------|------|-----|
| Os.55624.1.S1_at   | LOC_Os06g10160 | tyrosine protein kinase domain containing protein, putative, expressed                | 1.05 | down | 1.02 | up   | 2.17  | down | 1.08 | up   | 1.01  | down | 1.80  | up   | ABA |
| Os.55634.1.S1_at   | LOC_Os03g19260 | expressed protein                                                                     | 1.61 | up   | 1.03 | down | 4.34  | down | 1.44 | up   | 1.33  | down | 1.33  | down | ABA |
| Os.55635.1.S1_at   | LOC_Os02g36510 | ethylene-insensitive 3, putative, expressed                                           | 1.17 | up   | 1.12 | up   | 9.09  | up   | 1.06 | down | 1.77  | up   | 1.30  | up   | ABA |
| Os.55636.1.S1_at   | LOC_Os05g48010 | MYB family transcription factor, putative, expressed                                  | 1.10 | down | 1.01 | up   | 2.67  | down | 1.54 | up   | 1.28  | up   | 2.04  | up   | 2   |
| Os.55637.1.S1_at   | LOC_Os05g45070 | harpin-induced protein 1 domain containing protein, expressed                         | 1.51 | down | 1.96 | up   | 1.07  | up   | 1.05 | down | 1.09  | down | 3.52  | up   | JA  |
| Os.55638.1.S1_at   | LOC_Os09g36750 | L-ascorbate peroxidase 4, putative, expressed                                         | 1.17 | up   | 1.19 | down | 2.11  | up   | 1.24 | up   | 1.34  | up   | 1.30  | up   | ABA |
| Os.55640.1.S1_at   | LOC_Os02g37000 | mitochondrial prohibitin complex protein 1, putative, expressed                       | 1.17 | up   | 1.28 | up   | 3.06  | up   | 1.31 | down | 2.01  | up   | 1.18  | up   | 2   |
| Os.55643.1.S1_at   | LOC_Os04g46440 | AP2 domain containing protein, expressed                                              | 1.23 | up   | 1.43 | up   | 5.67  | up   | 1.26 | down | 1.09  | down | 1.06  | up   | ABA |
| Os.55651.1.S1_at   | LOC_Os06g11450 | zinc finger, C3HC4 type domain containing protein, expressed                          | 1.10 | up   | 1.09 | down | 3.01  | up   | 1.09 | up   | 1.12  | up   | 1.63  | up   | ABA |
| Os.55662.1.S1_at   | LOC_Os12g38230 | expressed protein                                                                     | 1.07 | up   | 6.28 | up   | 1.07  | down | 1.17 | up   | 1.02  | up   | 1.02  | down | BAP |
| Os.55669.1.S1_at   | CT831366       | Oryza sativa (indica cultivar-group) cDNA clone:OSIGCEA011B14, full insert sequence   | 1.08 | down | 1.09 | down | 2.69  | down | 1.11 | down | 1.26  | down | 1.03  | down | ABA |
| Os.55671.1.S1_at   | LOC_Os06g44250 | haemolysin-III, putative, expressed                                                   | 2.06 | up   | 1.03 | up   | 5.60  | up   | 1.06 | up   | 1.71  | up   | 1.17  | up   | 2   |
| Os.55682.1.S1_at   | LOC_Os03g22820 | expressed protein                                                                     | 1.00 | down | 2.19 | up   | 3.71  | up   | 1.01 | down | 1.06  | up   | 1.97  | up   | 3   |
| Os.55684.1.S1_at   | LOC_Os01g55150 | bZIP transcription factor domain containing protein, expressed                        | 1.05 | down | 1.22 | down | 6.29  | down | 1.25 | down | 1.36  | down | 1.55  | down | ABA |
| Os.55694.1.S1_at   | LOC_Os02g42920 | DTA2, putative, expressed                                                             | 1.17 | down | 1.01 | down | 2.63  | up   | 1.14 | up   | 1.20  | up   | 1.17  | up   | ABA |
| Os.55696.1.S1_at   | LOC_Os12g39100 | expressed protein                                                                     | 1.80 | up   | 1.90 | down | 2.79  | down | 1.15 | up   | 1.34  | down | 1.02  | down | ABA |
| Os.55703.1.S1_at   | AK108605       | basic helix-loop-helix (bHLH) family protein                                          | 1.24 | down | 1.31 | down | 2.01  | down | 1.04 | up   | 1.49  | up   | 1.00  | up   | ABA |
| Os.55718.1.S1_x_at | LOC_Os12g44320 | carbohydrate binding protein, putative, expressed                                     | 1.10 | down | 1.01 | down | 2.55  | down | 1.22 | up   | 1.05  | up   | 1.03  | down | ABA |
| Os.55730.1.S1_at   | LOC_Os05g01444 | polygalacturonase inhibitor precursor, putative, expressed                            | 2.01 | down | 1.92 | down | 1.20  | up   | 1.43 | up   | 30.31 | up   | 1.98  | up   | 3   |
| Os.55742.1.S1_at   | LOC_Os09g37976 | cupin domain containing protein, expressed                                            | 1.12 | down | 1.35 | up   | 4.06  | up   | 2.64 | down | 3.40  | up   | 1.82  | up   | 3   |
| Os.55750.1.S1_at   | LOC_Os05g23398 | expressed protein                                                                     | 1.01 | down | 1.00 | up   | 2.17  | up   | 1.01 | up   | 1.00  | up   | 1.02  | up   | ABA |
| Os.55753.1.S1_at   | LOC_Os02g10240 | ZOS2-05 - C2H2 zinc finger protein, expressed                                         | 1.06 | down | 1.59 | up   | 7.69  | up   | 1.46 | up   | 1.37  | up   | 1.14  | up   | ABA |
| Os.55753.1.S1_x_at | LOC_Os02g10240 | ZOS2-05 - C2H2 zinc finger protein, expressed                                         | 1.12 | down | 1.30 | up   | 5.22  | up   | 1.03 | up   | 1.24  | up   | 1.26  | up   | ABA |
| Os.55764.1.S1_at   | LOC_Os02g52590 | xyloglucan fucosyltransferase, putative, expressed                                    | 1.02 | up   | 1.04 | up   | 64.20 | up   | 1.00 | up   | 1.36  | up   | 1.01  | down | ABA |
| Os.55786.1.S1_at   | LOC_Os06g09270 | hypro1, putative, expressed                                                           | 2.57 | down | 1.31 | down | 1.57  | up   | 1.83 | down | 4.12  | down | 1.46  | down | 2   |
| Os.55787.1.S1_at   | LOC_Os10g28000 | glutathione reductase, putative, expressed                                            | 3.87 | up   | 1.06 | down | 21.36 | up   | 1.30 | down | 17.14 | up   | 1.96  | up   | 4   |
| Os.55800.1.S1_at   | LOC_Os04g37980 | transporter family protein, putative, expressed                                       | 1.89 | down | 1.27 | up   | 5.91  | down | 1.68 | up   | 1.75  | down | 1.18  | down | ABA |
| Os.55820.1.S1_at   | AK108847       | Oryza sativa Japonica Group cDNA clone:002-152-A03, full insert sequence.             | 1.18 | up   | 1.01 | down | 10.44 | up   | 1.01 | up   | 1.00  | down | 1.02  | up   | ABA |
| Os.55827.1.S1_at   | LOC_Os11g29870 | OsWRKY72 - Superfamily of TFs having WRKY and zinc finger domains, expressed          | 1.27 | up   | 1.68 | up   | 1.83  | up   | 1.02 | up   | 1.51  | up   | 2.39  | up   | JA  |
| Os.5583.1.S1_at    | LOC_Os03g19270 | universal stress protein domain containing protein, putative, expressed               | 1.44 | down | 1.16 | up   | 31.97 | up   | 1.64 | up   | 2.44  | up   | 1.12  | down | 2   |
| Os.5585.1.S1_at    | LOC_Os04g54590 | expressed protein                                                                     | 1.66 | down | 2.04 | up   | 1.66  | down | 1.04 | down | 1.18  | down | 1.35  | down | BAP |
| Os.55850.1.S1_at   | LOC_Os08g34800 | expressed protein                                                                     | 1.21 | up   | 1.41 | up   | 2.96  | up   | 1.18 | up   | 1.85  | up   | 1.31  | up   | ABA |
| Os.5587.1.S1_at    | CT835794       | Oryza sativa (indica cultivar-group) cDNA clone:OSIGCSN032H02, full insert sequence   | 1.06 | up   | 1.00 | down | 3.63  | up   | 1.03 | up   | 1.11  | down | 1.01  | down | ABA |
| Os.5588.1.S1_s_at  | LOC_Os03g09980 | sulfate transporter, putative, expressed                                              | 1.45 | down | 1.18 | up   | 65.87 | down | 1.48 | up   | 5.47  | down | 6.92  | down | 3   |
| Os.55886.1.S1_at   | LOC_Os01g56030 | EF hand family protein, putative, expressed                                           | 1.50 | down | 2.59 | down | 11.57 | down | 1.23 | up   | 1.67  | down | 1.79  | up   | 2   |
| Os.55907.1.S1_at   | AK108976       | Oryza sativa (japonica cultivar-group) Os01g0754800 (Os01g0754800) mRNA, complete cds | 1.05 | down | 4.72 | up   | 3.59  | down | 2.43 | up   | 3.33  | up   | 1.79  | up   | 4   |
| Os.55911.1.S1_at   | LOC_Os05g02390 | ZOS5-02 - C2H2 zinc finger protein, expressed                                         | 1.26 | up   | 1.73 | down | 1.84  | up   | 1.23 | down | 2.74  | up   | 1.46  | down | SA  |
| Os.5592.1.S1_at    | LOC_Os02g48710 | expressed protein                                                                     | 1.14 | up   | 1.13 | up   | 2.79  | up   | 1.24 | down | 1.39  | up   | 1.02  | down | ABA |
| Os.55921.1.S1_at   | LOC_Os03g32220 | ZOS3-11 - C2H2 zinc finger protein, expressed                                         | 1.01 | down | 1.72 | up   | 1.14  | down | 1.33 | up   | 1.04  | up   | 10.85 | up   | JA  |
| Os.5593.1.S1_at    | LOC_Os01g32380 | expressed protein                                                                     | 1.05 | up   | 1.16 | down | 2.16  | down | 1.41 | up   | 8.86  | up   | 1.23  | up   | 2   |
| Os.5594.1.S1_at    | LOC_Os05g48340 | proteasome-related, putative, expressed                                               | 1.34 | up   | 1.14 | up   | 5.37  | up   | 1.22 | up   | 1.42  | up   | 1.19  | down | ABA |
| Os.55956.1.S1_at   | LOC_Os03g55380 | oxidoreductase, putative, expressed                                                   | 1.04 | down | 1.01 | up   | 3.90  | up   | 1.12 | up   | 1.21  | up   | 1.05  | down | ABA |
| Os.5599.1.S1_at    | LOC_Os08g31580 | ethylene-responsive transcription factor, putative, expressed                         | 1.23 | up   | 1.09 | up   | 2.69  | up   | 1.04 | up   | 1.20  | up   | 1.04  | down | ABA |
| Os.5599.1.S1_x_at  | LOC_Os08g31580 | ethylene-responsive transcription factor, putative, expressed                         | 1.15 | up   | 1.07 | down | 2.77  | up   | 1.03 | up   | 1.19  | up   | 1.08  | down | ABA |
| Os.5600.1.S1_s_at  | LOC_Os06g03690 | RNA recognition motif containing protein, putative, expressed                         | 1.15 | down | 1.05 | up   | 3.51  | up   | 1.15 | up   | 1.40  | up   | 1.08  | up   | ABA |
| Os.56004.1.S1_at   | LOC_Os03g22590 | nodulin MtN3 family protein, putative, expressed                                      | 1.01 | down | 1.00 | up   | 21.24 | up   | 1.00 | up   | 1.01  | up   | 1.02  | up   | ABA |
| Os.56016.1.S1_at   | LOC_Os03g63620 | tetraspanin family protein, putative, expressed                                       | 3.96 | up   | 1.05 | up   | 2.07  | down | 3.96 | up   | 58.49 | up   | 1.64  | down | 4   |
| Os.56019.1.S1_at   | LOC_Os06g04480 | expressed protein                                                                     | 1.92 | up   | 1.14 | down | 3.77  | up   | 1.62 | down | 1.24  | down | 1.13  | up   | ABA |
| Os.56048.1.S1_s_at | LOC_Os01g68740 | keratin, type I cytoskeletal 9, putative, expressed                                   | 1.82 | down | 1.31 | up   | 29.80 | down | 1.32 | down | 3.59  | down | 1.62  | down | 2   |
| Os.56072.1.S1_at   | LOC_Os11g01550 | DUF260 domain containing protein, putative, expressed                                 | 1.36 | up   | 1.00 | up   | 6.41  | up   | 1.21 | up   | 1.87  | up   | 1.14  | down | ABA |
| Os.56087.1.S1_at   | LOC_Os06g40850 | IQ calmodulin-binding motif family protein, putative, expressed                       | 1.29 | down | 1.43 | down | 2.45  | down | 1.35 | down | 1.06  | down | 1.05  | up   | ABA |
| Os.56093.1.S1_at   | LOC_Os07g03170 | expressed protein                                                                     | 2.33 | down | 1.46 | up   | 2.57  | down | 1.25 | up   | 1.26  | down | 3.02  | up   | 2   |
| Os.56104.1.A1_at   | LOC_Os02g39490 | carbonyl reductase 3, putative, expressed                                             | 1.38 | down | 1.33 | down | 2.15  | down | 1.23 | up   | 1.42  | down | 1.23  | up   | ABA |
| Os.56129.1.S1_at   | NM_001054317   | Oryza sativa (japonica cultivar-group) Os02g0689000 (Os02g0689000) mRNA, complete cds | 1.05 | down | 1.03 | up   | 8.79  | up   | 1.07 | down | 1.62  | up   | 1.02  | up   | ABA |
| Os.56133.1.S1_at   | AK109312       | Oryza sativa Japonica Group cDNA clone:002-188-F07, full insert sequence.             | 1.01 | down | 1.00 | down | 17.92 | up   | 1.00 | up   | 1.00  | down | 1.01  | up   | ABA |

|                    |                |                                                                                       |       |      |      |      |        |      |      |      |       |      |      |      |     |
|--------------------|----------------|---------------------------------------------------------------------------------------|-------|------|------|------|--------|------|------|------|-------|------|------|------|-----|
| Os.56134.1.S1_at   | AK109313       | Oryza sativa Japonica Group cDNA clone:002-188-F12, full insert sequence.             | 1.11  | up   | 1.13 | up   | 2.77   | up   | 1.32 | down | 1.15  | up   | 1.40 | up   | ABA |
| Os.5614.1.S1_x_at  | LOC_Os06g42030 | potassium transporter, putative, expressed                                            | 1.33  | down | 1.01 | up   | 2.35   | up   | 1.01 | up   | 1.26  | up   | 1.04 | down | ABA |
| Os.5616.1.S1_at    | LOC_Os03g18740 | oxidoreductase, short chain dehydrogenase/reductase family, putative, expressed       | 1.51  | up   | 1.53 | up   | 2.98   | down | 1.02 | up   | 1.22  | down | 1.45 | down | ABA |
| Os.56173.1.S1_at   | LOC_Os04g45340 | expressed protein                                                                     | 1.06  | up   | 1.07 | up   | 2.62   | down | 1.07 | down | 1.05  | up   | 1.07 | up   | ABA |
| Os.56193.1.S1_at   | LOC_Os09g30240 | phosphofructokinase, putative, expressed                                              | 1.00  | down | 1.01 | up   | 53.93  | up   | 1.02 | down | 1.04  | down | 1.01 | up   | ABA |
| Os.56210.1.S1_at   | LOC_Os04g42950 | MYB family transcription factor, putative, expressed                                  | 1.34  | up   | 3.39 | down | 487.23 | up   | 1.34 | up   | 1.53  | up   | 1.24 | up   | 2   |
| Os.5622.2.S1_x_at  | LOC_Os10g33140 | hcrVf2 protein, putative, expressed                                                   | 1.13  | down | 1.06 | down | 4.76   | down | 1.04 | down | 1.19  | down | 1.54 | up   | ABA |
| Os.56224.1.S1_at   | LOC_Os01g02010 | expressed protein                                                                     | 1.14  | down | 1.72 | up   | 2.33   | down | 1.36 | down | 2.08  | down | 1.01 | down | 2   |
| Os.56229.1.S1_at   | LOC_Os11g04330 | OsFBK24 - F-box domain and kelch repeat containing protein, expressed                 | 1.05  | down | 1.09 | up   | 3.03   | down | 1.08 | down | 1.42  | down | 1.02 | up   | ABA |
| Os.56257.1.S1_at   | LOC_Os05g46750 | STE_MEKK_ste11_MAP3K.18 - STE kinases include homologs to sterile 7, sterile 11 a     | 1.31  | up   | 1.65 | up   | 21.95  | up   | 1.07 | down | 1.79  | up   | 3.33 | up   | 2   |
| Os.56356.1.S1_at   | LOC_Os11g32100 | inducer of CBF expression 1, putative, expressed                                      | 1.07  | down | 1.38 | down | 2.78   | down | 1.10 | down | 1.18  | down | 1.00 | down | ABA |
| Os.56365.1.S1_at   | LOC_Os03g19370 | CPuORF4 - conserved peptide uORF-containing transcript, expressed                     | 1.64  | up   | 5.24 | down | 1.94   | up   | 2.39 | down | 3.56  | up   | 2.49 | down | 4   |
| Os.56370.1.S1_at   | LOC_Os06g05940 | DTA2, putative, expressed                                                             | 1.11  | down | 1.15 | up   | 4.94   | up   | 1.23 | down | 1.10  | up   | 1.09 | down | ABA |
| Os.56382.1.S1_at   | LOC_Os08g01830 | TKL_IRAK_CR4L6 - The CR4L subfamily has homology with Crinkly4, expressed             | 1.20  | up   | 1.10 | up   | 2.04   | up   | 1.01 | up   | 1.46  | up   | 1.05 | up   | ABA |
| Os.5649.1.S1_at    | LOC_Os05g08480 | cytokinin-O-glucosyltransferase 1, putative, expressed                                | 1.12  | up   | 1.00 | up   | 4.81   | up   | 1.27 | down | 1.22  | down | 1.14 | down | ABA |
| Os.5656.1.S1_at    | LOC_Os02g36520 | OsFBK9 - F-box domain and kelch repeat containing protein, expressed                  | 1.43  | up   | 1.01 | down | 2.07   | up   | 1.10 | up   | 1.22  | up   | 1.07 | down | ABA |
| Os.5657.1.S1_at    | LOC_Os03g06290 | OsSub27 - Putative Subtilisin homologue, expressed                                    | 1.01  | up   | 1.04 | up   | 9.22   | up   | 1.00 | up   | 1.02  | up   | 1.02 | up   | ABA |
| Os.5661.1.S1_s_at  | LOC_Os08g39694 | cytochrome P450, putative, expressed                                                  | 1.19  | up   | 1.53 | down | 6.13   | up   | 1.27 | down | 1.64  | up   | 1.19 | up   | ABA |
| Os.56612.1.A1_x_at | LOC_Os05g11980 | timeless protein, expressed                                                           | 2.30  | down | 2.01 | down | 7.33   | down | 1.49 | down | 1.89  | down | 1.95 | down | 4   |
| Os.56682.1.S1_at   | LOC_Os06g50940 | GDSL-like lipase/acylhydrolase, putative, expressed                                   | 1.28  | up   | 1.53 | down | 1.97   | down | 1.80 | up   | 2.76  | up   | 3.95 | up   | 3   |
| Os.5673.1.S1_at    | LOC_Os05g32330 | endonuclease/exonuclease/phosphatase family domain containing protein, expressed      | 1.06  | up   | 1.01 | down | 2.06   | down | 1.05 | down | 1.21  | down | 1.22 | down | ABA |
| Os.56873.1.S1_at   | LOC_Os03g26044 | CSLA5 - cellulose synthase-like family A; mannan synthase, expressed                  | 1.16  | down | 1.14 | down | 13.35  | up   | 1.07 | up   | 1.04  | down | 1.22 | up   | ABA |
| Os.56873.1.S1_x_at | LOC_Os03g26044 | CSLA5 - cellulose synthase-like family A; mannan synthase, expressed                  | 1.12  | up   | 1.00 | up   | 8.63   | up   | 1.02 | up   | 1.01  | up   | 1.04 | up   | ABA |
| Os.56875.1.S1_at   | LOC_Os08g34390 | retrotransposon protein, putative, unclassified, expressed                            | 1.02  | up   | 1.07 | up   | 498.65 | up   | 1.00 | up   | 1.00  | down | 1.01 | up   | ABA |
| Os.56892.1.S1_at   | LOC_Os09g35850 | RNA recognition motif containing protein, putative, expressed                         | 1.12  | up   | 1.17 | up   | 2.03   | down | 1.19 | down | 1.76  | down | 2.45 | down | 2   |
| Os.5690.1.S1_at    | LOC_Os01g46760 | protein phosphatase 2C, putative, expressed                                           | 1.28  | up   | 1.08 | down | 34.60  | down | 1.49 | down | 1.13  | down | 1.02 | up   | ABA |
| Os.56907.1.S1_at   | LOC_Os09g27510 | cytochrome P450, putative, expressed                                                  | 1.56  | down | 1.16 | down | 41.05  | down | 2.05 | up   | 2.30  | down | 5.31 | down | 4   |
| Os.56918.1.S1_at   | LOC_Os03g62330 | expressed protein                                                                     | 1.23  | up   | 1.12 | down | 3.08   | up   | 1.46 | down | 3.56  | up   | 1.50 | down | 2   |
| Os.5693.1.S1_at    | LOC_Os01g64300 | DUF584 domain containing protein, putative, expressed                                 | 1.15  | down | 1.14 | up   | 2.42   | up   | 1.21 | up   | 1.22  | up   | 1.05 | up   | ABA |
| Os.56930.1.S1_at   | LOC_Os03g17220 | dirigent, putative, expressed                                                         | 1.09  | up   | 1.09 | down | 1.54   | up   | 1.14 | up   | 2.63  | down | 1.09 | up   | SA  |
| Os.56944.1.S1_at   | LOC_Os05g25260 | AP2 domain containing protein, expressed                                              | 1.09  | up   | 1.39 | up   | 4.01   | up   | 1.15 | up   | 1.06  | down | 1.42 | up   | ABA |
| Os.56946.1.S1_at   | LOC_Os11g14910 | NADP-dependent oxidoreductase, putative, expressed                                    | 6.14  | up   | 2.69 | down | 3.06   | up   | 1.03 | down | 13.26 | up   | 1.35 | up   | 4   |
| Os.56959.1.S1_at   | LOC_Os04g47140 | expressed protein                                                                     | 1.12  | up   | 1.92 | down | 15.98  | up   | 1.12 | down | 2.17  | up   | 1.35 | up   | 2   |
| Os.56999.1.S1_at   | LOC_Os03g17940 | phosphatase, putative, expressed                                                      | 1.16  | up   | 1.00 | down | 2.75   | up   | 1.18 | down | 1.09  | down | 1.17 | down | ABA |
| Os.57028.1.S1_at   | LOC_Os04g57380 | acyl-protein thioesterase, putative, expressed                                        | 1.18  | up   | 1.00 | up   | 3.91   | up   | 1.03 | down | 1.09  | up   | 1.02 | down | ABA |
| Os.57033.1.S1_at   | LOC_Os11g37980 | GAUT2/LGT2, putative, expressed                                                       | 1.19  | up   | 1.18 | down | 4.71   | up   | 1.35 | down | 1.64  | up   | 1.04 | up   | ABA |
| Os.57036.1.S1_at   | LOC_Os08g38580 | harpin-induced protein 1 domain containing protein, expressed                         | 1.68  | up   | 1.34 | down | 3.51   | up   | 1.33 | down | 1.24  | up   | 1.26 | up   | ABA |
| Os.57091.1.S1_at   | LOC_Os08g01950 | transferase family protein, putative, expressed                                       | 1.84  | down | 1.10 | down | 3.68   | down | 1.17 | up   | 1.78  | up   | 1.62 | down | ABA |
| Os.57101.1.S1_at   | NM_001071157   | Oryza sativa (japonica cultivar-group) Os10g0420200 (Os10g0420200) mRNA, complete cds | 1.01  | up   | 1.26 | up   | 2.07   | down | 1.01 | up   | 1.25  | down | 1.85 | down | ABA |
| Os.57108.1.S1_at   | LOC_Os12g24330 | expressed protein                                                                     | 2.63  | down | 2.13 | down | 5.73   | down | 2.27 | up   | 4.06  | up   | 2.81 | down | 6   |
| Os.57155.1.S1_at   | LOC_Os08g41080 | expressed protein                                                                     | 1.02  | up   | 1.00 | down | 3.44   | up   | 1.01 | up   | 1.02  | down | 1.00 | up   | ABA |
| Os.5717.1.S1_at    | LOC_Os04g43170 | caleosin related protein, putative, expressed                                         | 1.01  | down | 1.05 | up   | 480.45 | up   | 1.01 | down | 1.00  | up   | 1.02 | up   | ABA |
| Os.57188.1.S1_at   | NM_001064804   | Oryza sativa (japonica cultivar-group) Os06g0660400 (Os06g0660400) mRNA, complete cds | 1.18  | up   | 1.06 | up   | 2.21   | down | 1.34 | down | 1.39  | down | 1.40 | down | ABA |
| Os.57191.1.S1_at   | LOC_Os06g05470 | expressed protein                                                                     | 1.65  | up   | 1.07 | down | 2.08   | up   | 1.01 | down | 4.13  | up   | 1.08 | down | 2   |
| Os.57197.1.S1_at   | AK287807       | Oryza sativa Japonica Group cDNA, clone: J065178H22, full insert sequence.            | 1.04  | down | 1.20 | up   | 3.36   | up   | 1.25 | up   | 1.17  | up   | 1.39 | down | ABA |
| Os.57199.1.S1_at   | LOC_Os09g35870 | OsIAA26 - Auxin-responsive Aux/IAA gene family member, expressed                      | 67.68 | up   | 1.09 | up   | 1.01   | down | 1.00 | up   | 1.13  | up   | 1.01 | up   | IAA |
| Os.5725.1.S1_at    | LOC_Os12g07210 | expressed protein                                                                     | 1.09  | up   | 1.09 | up   | 5.44   | down | 1.59 | down | 1.63  | down | 1.51 | down | ABA |
| Os.57309.1.S1_at   | LOC_Os04g19960 | retrotransposon protein, putative, unclassified, expressed                            | 1.07  | up   | 1.85 | down | 2.50   | down | 1.33 | down | 1.63  | down | 2.45 | down | 2   |
| Os.57316.1.S1_at   | AK111286       | Oryza sativa (japonica cultivar-group) Os05g0465000 (Os05g0465000) mRNA, complete cds | 76.31 | up   | 1.49 | down | 1.67   | down | 1.35 | down | 1.58  | up   | 2.13 | up   | 2   |
| Os.57334.1.S1_at   | LOC_Os11g13720 | expressed protein                                                                     | 1.35  | up   | 1.21 | down | 3.65   | up   | 1.00 | up   | 3.01  | down | 1.85 | down | 2   |
| Os.57338.1.S1_at   | LOC_Os02g53030 | mitogen-activated protein kinase kinase kinase 1, putative, expressed                 | 1.35  | down | 1.02 | down | 12.23  | up   | 1.08 | up   | 1.11  | up   | 1.09 | up   | ABA |
| Os.57343.1.S1_at   | CT833201       | Oryza sativa (indica cultivar-group) cDNA clone:OSIGCP1016E11, full insert sequence.  | 1.25  | up   | 1.18 | up   | 51.75  | up   | 1.22 | up   | 1.85  | up   | 1.92 | up   | ABA |
| Os.57354.1.S1_at   | LOC_Os04g56490 | expressed protein                                                                     | 1.32  | down | 4.08 | down | 1.64   | up   | 1.05 | down | 3.43  | up   | 1.04 | down | 2   |
| Os.5736.1.S1_s_at  | LOC_Os10g26620 | dof zinc finger domain containing protein, putative, expressed                        | 1.11  | down | 1.47 | down | 2.70   | up   | 1.05 | down | 1.03  | up   | 1.18 | down | ABA |
| Os.5736.2.S1_x_at  | LOC_Os10g26620 | dof zinc finger domain containing protein, putative, expressed                        | 3.01  | up   | 1.14 | down | 3.83   | up   | 1.11 | up   | 1.09  | up   | 1.17 | up   | 2   |



|                    |                |                                                                                        |       |      |      |      |       |      |      |      |      |      |      |      |     |
|--------------------|----------------|----------------------------------------------------------------------------------------|-------|------|------|------|-------|------|------|------|------|------|------|------|-----|
| Os.57373.1.S1_at   | LOC_Os06g19630 | steroid nuclear receptor, ligand-binding, putative, expressed                          | 1.06  | up   | 1.05 | down | 75.12 | up   | 1.02 | up   | 1.02 | up   | 1.03 | up   | ABA |
| Os.5739.1.S1_at    | LOC_Os05g49300 | iron-sulfur cluster assembly enzyme ISCU, mitochondrial precursor, putative, expressed | 1.22  | up   | 1.00 | down | 3.62  | up   | 1.32 | down | 1.06 | up   | 1.19 | down | ABA |
| Os.57401.1.S1_at   | LOC_Os07g08500 | C-5 cytosine-specific DNA methylase, putative, expressed                               | 1.48  | down | 1.13 | down | 5.07  | down | 1.22 | down | 2.16 | down | 2.05 | down | 3   |
| Os.57406.1.S1_at   | LOC_Os05g20100 | glycerol-3-phosphate acyltransferase, putative, expressed                              | 1.28  | up   | 1.73 | up   | 9.48  | up   | 1.17 | up   | 1.46 | up   | 1.63 | down | ABA |
| Os.57432.1.S1_a_at | LOC_Os08g07290 | HEAT repeat family protein, putative, expressed                                        | 1.01  | up   | 1.07 | down | 2.13  | down | 1.40 | up   | 1.18 | down | 1.10 | down | ABA |
| Os.57456.1.S1_x_at | LOC_Os01g24710 | jacalin-like lectin domain containing protein, expressed                               | 1.16  | down | 1.08 | up   | 4.90  | up   | 1.31 | up   | 1.73 | up   | 1.85 | up   | ABA |
| Os.57464.1.S1_x_at | LOC_Os11g10480 | dehydrogenase, putative, expressed                                                     | 1.07  | down | 1.14 | up   | 2.68  | up   | 1.68 | up   | 1.95 | up   | 1.20 | up   | ABA |
| Os.57465.1.S1_x_at | LOC_Os03g28330 | sucrose synthase, putative, expressed                                                  | 1.04  | down | 1.01 | down | 2.48  | down | 1.02 | down | 1.21 | down | 1.11 | up   | ABA |
| Os.57499.1.S1_x_at | LOC_Os11g05640 | bZIP transcription factor domain containing protein, expressed                         | 1.15  | up   | 1.05 | down | 16.75 | up   | 1.07 | down | 1.03 | up   | 1.05 | down | ABA |
| Os.5753.1.S1_x_at  | LOC_Os04g56060 | protein kinase domain containing protein, expressed                                    | 1.57  | down | 1.04 | down | 4.08  | down | 1.10 | down | 1.84 | down | 1.83 | down | ABA |
| Os.57531.1.S1_at   | LOC_Os04g48170 | cytochrome P450, putative, expressed                                                   | 15.03 | up   | 1.18 | down | 1.08  | down | 1.00 | down | 1.13 | down | 1.16 | down | IAA |
| Os.57548.1.S1_at   | LOC_Os12g05590 | RCN3 Centroradialis-like1 homologous to TFL1 gene; contains Pfam profile PF01161: F    | 1.27  | down | 3.77 | up   | 3.72  | up   | 1.53 | down | 1.19 | down | 2.00 | down | 3   |
| Os.57569.2.A1_s_at | LOC_Os08g04500 | terpene synthase, putative, expressed                                                  | 1.07  | down | 1.03 | down | 14.70 | down | 3.83 | down | 2.46 | down | 1.06 | up   | 3   |
| Os.5757.1.S1_at    | LOC_Os12g38360 | RALFL31 - Rapid ALkalinization Factor RALF family protein precursor, expressed         | 1.02  | down | 1.02 | down | 7.10  | down | 1.05 | up   | 1.66 | down | 1.11 | up   | ABA |
| Os.57573.1.S1_at   | LOC_Os11g06130 | PHD-finger family protein, expressed                                                   | 1.11  | up   | 1.04 | up   | 8.03  | up   | 1.08 | up   | 1.86 | up   | 1.26 | up   | ABA |
| Os.5767.1.S1_at    | LOC_Os08g01100 | HMG1/2, putative, expressed                                                            | 1.74  | down | 1.02 | up   | 15.93 | down | 1.34 | down | 3.14 | down | 2.54 | down | 3   |
| Os.5768.1.S1_at    | LOC_Os09g15320 | ubiquitin-conjugating enzyme, putative, expressed                                      | 1.04  | down | 1.11 | down | 2.94  | up   | 1.08 | up   | 4.72 | up   | 1.58 | up   | 2   |
| Os.5798.1.S1_at    | LOC_Os02g36500 | expressed protein                                                                      | 1.04  | down | 1.30 | down | 3.29  | down | 1.39 | down | 2.06 | down | 1.38 | down | 2   |
| Os.5808.1.S1_at    | LOC_Os09g16920 | cytochrome b5 protein, putative, expressed                                             | 1.06  | down | 1.16 | down | 2.45  | down | 1.28 | down | 1.34 | down | 1.06 | up   | ABA |
| Os.5830.1.S1_at    | LOC_Os03g21000 | thioredoxin, putative, expressed                                                       | 1.20  | up   | 1.15 | down | 2.38  | up   | 1.07 | down | 1.01 | up   | 1.12 | down | ABA |
| Os.5853.1.S1_at    | LOC_Os12g44230 | expressed protein                                                                      | 1.20  | down | 1.10 | up   | 3.62  | down | 1.30 | up   | 1.86 | down | 1.04 | up   | ABA |
| Os.5853.2.S1_x_at  | LOC_Os12g44230 | expressed protein                                                                      | 1.41  | down | 1.25 | up   | 5.64  | down | 1.31 | up   | 2.04 | down | 1.03 | up   | 2   |
| Os.5860.1.S1_at    | LOC_Os03g04310 | BHLH transcription factor, putative, expressed                                         | 1.12  | up   | 1.83 | up   | 1.53  | down | 1.22 | up   | 2.34 | down | 3.13 | down | 2   |
| Os.5862.1.S1_at    | LOC_Os01g50200 | UDP-glucuronosyl and UDP-glucosyl transferase domain containing protein, expressed     | 3.15  | up   | 1.01 | up   | 1.07  | up   | 1.44 | up   | 4.15 | up   | 1.66 | up   | 2   |
| Os.5869.3.S1_x_at  | LOC_Os04g38410 | chlorophyll A-B binding protein, putative, expressed                                   | 1.22  | up   | 1.08 | up   | 3.45  | down | 1.16 | down | 1.45 | down | 1.24 | down | ABA |
| Os.5881.1.S1_at    | LOC_Os05g19030 | expressed protein                                                                      | 1.32  | down | 1.22 | up   | 2.37  | down | 1.08 | up   | 1.65 | down | 1.21 | down | ABA |
| Os.5890.1.S1_at    | LOC_Os04g45690 | B-box zinc finger family protein, putative, expressed                                  | 1.36  | up   | 2.60 | up   | 1.27  | down | 1.03 | up   | 1.76 | up   | 1.06 | down | BAP |
| Os.5901.1.S1_at    | LOC_Os12g29550 | expressed protein                                                                      | 1.09  | up   | 1.08 | up   | 2.03  | up   | 1.06 | down | 1.02 | down | 1.05 | down | ABA |
| Os.5905.1.S1_at    | LOC_Os06g32990 | peroxidase precursor, putative, expressed                                              | 2.67  | down | 1.14 | up   | 56.43 | down | 2.28 | up   | 2.01 | down | 1.21 | up   | 4   |
| Os.5919.1.S1_at    | LOC_Os03g25040 | GDSL-like lipase/acylhydrolase, putative, expressed                                    | 1.27  | down | 2.86 | up   | 2.30  | down | 1.00 | up   | 2.07 | down | 1.80 | up   | 3   |
| Os.5920.1.S1_at    | LOC_Os01g52660 | POEI51 - Pollen Ole e I allergen and extensin family protein precursor, expressed      | 2.90  | down | 4.10 | down | 5.94  | down | 2.48 | down | 4.85 | down | 3.30 | down | 6   |
| Os.5940.1.S1_at    | LOC_Os01g50370 | STE_MEKK_ste11_MAP3K.4 - STE kinases include homologs to sterile 7, sterile 11 an      | 1.24  | up   | 1.58 | down | 5.96  | up   | 1.45 | up   | 2.69 | up   | 1.51 | up   | 2   |
| Os.5975.1.S1_at    | LOC_Os02g58650 | expressed protein                                                                      | 1.15  | up   | 1.00 | up   | 2.56  | down | 1.03 | down | 1.42 | down | 1.05 | up   | ABA |
| Os.5975.1.S2_at    | LOC_Os02g58650 | expressed protein                                                                      | 1.03  | down | 1.01 | down | 2.46  | down | 1.01 | down | 1.53 | down | 1.08 | down | ABA |
| Os.5983.1.S1_at    | LOC_Os09g23530 | dehydrogenase, putative, expressed                                                     | 1.12  | up   | 1.34 | up   | 9.09  | down | 1.80 | up   | 2.01 | up   | 3.32 | up   | 2   |
| Os.5987.1.S1_at    | LOC_Os05g32500 | expressed protein                                                                      | 1.02  | down | 1.01 | up   | 2.25  | down | 1.12 | down | 1.68 | down | 1.21 | up   | ABA |
| Os.6003.1.S1_x_at  | AK069858       | Oryza sativa (indica cultivar-group) cDNA clone:OSIGCSN011H18, full insert sequence    | 1.09  | up   | 1.17 | down | 4.69  | up   | 1.04 | down | 1.10 | up   | 1.47 | up   | ABA |
| Os.6019.1.S1_at    | LOC_Os11g01570 | PMR5, putative, expressed                                                              | 1.30  | down | 1.03 | up   | 4.28  | down | 1.10 | up   | 1.21 | down | 2.11 | up   | 2   |
| Os.6023.1.S1_s_at  | LOC_Os05g46460 | hydrolase, alpha/beta fold family domain containing protein, expressed                 | 1.19  | up   | 1.16 | down | 2.36  | up   | 1.03 | up   | 1.32 | up   | 1.91 | up   | ABA |
| Os.6031.1.S1_at    | LOC_Os11g36719 | lipoygenase, putative, expressed                                                       | 1.23  | down | 1.36 | down | 6.71  | down | 2.39 | down | 2.96 | down | 1.68 | down | 3   |
| Os.6035.1.S1_at    | LOC_Os07g46350 | OsSCP40 - Putative Serine Carboxypeptidase homologue, expressed                        | 1.64  | down | 1.08 | up   | 3.84  | down | 1.05 | down | 1.02 | up   | 1.72 | up   | ABA |
| Os.6037.2.S1_x_at  | LOC_Os09g27580 | potassium transporter, putative, expressed                                             | 1.13  | down | 1.24 | down | 5.22  | down | 1.65 | down | 1.16 | down | 1.26 | up   | ABA |
| Os.6057.1.A1_at    | LOC_Os08g04810 | serine esterase family protein, putative, expressed                                    | 1.27  | down | 1.28 | down | 4.07  | up   | 1.16 | up   | 1.88 | up   | 1.35 | up   | ABA |
| Os.606.1.S1_at     | LOC_Os06g04220 | expressed protein                                                                      | 8.44  | up   | 1.33 | up   | 4.96  | up   | 1.36 | up   | 1.25 | up   | 1.19 | down | 2   |
| Os.6061.1.S1_at    | LOC_Os04g40540 | protein-L-isoaspartate O-methyltransferase, putative, expressed                        | 1.00  | up   | 1.01 | up   | 2.54  | up   | 1.14 | up   | 1.03 | down | 1.01 | down | ABA |
| Os.6075.1.S1_at    | LOC_Os04g06520 | expressed protein                                                                      | 1.48  | down | 1.35 | down | 1.85  | up   | 1.03 | up   | 4.98 | up   | 1.16 | down | SA  |
| Os.6075.1.S2_at    | LOC_Os04g06520 | expressed protein                                                                      | 1.02  | down | 1.02 | up   | 1.77  | up   | 1.36 | up   | 5.96 | up   | 1.10 | down | SA  |
| Os.6080.1.S1_at    | LOC_Os06g04380 | aminomethyltransferase, putative, expressed                                            | 1.09  | up   | 1.05 | up   | 6.19  | up   | 1.14 | up   | 1.05 | up   | 1.06 | up   | ABA |
| Os.6085.1.S1_at    | LOC_Os05g46760 | STE_MEKK_ste11_MAP3K.19 - STE kinases include homologs to sterile 7, sterile 11 a      | 1.03  | up   | 1.01 | down | 2.52  | up   | 1.00 | up   | 1.01 | up   | 1.02 | up   | ABA |
| Os.609.3.S1_a_at   | LOC_Os08g37670 | plastocyanin-like domain containing protein, putative, expressed                       | 1.42  | up   | 1.11 | up   | 2.21  | down | 1.35 | up   | 1.95 | up   | 1.67 | up   | ABA |
| Os.6090.2.S1_at    | AK101123       | expressed protein                                                                      | 1.01  | down | 1.07 | down | 2.74  | up   | 1.35 | up   | 1.03 | up   | 1.00 | down | ABA |
| Os.6092.1.S1_at    | LOC_Os02g44230 | CPuORF22 - conserved peptide uORF-containing transcript, expressed                     | 1.44  | up   | 1.11 | up   | 7.39  | down | 1.05 | down | 1.17 | up   | 1.11 | up   | ABA |
| Os.6116.1.S1_at    | LOC_Os12g38150 | osmotin, putative, expressed                                                           | 1.22  | up   | 2.33 | up   | 2.23  | up   | 1.07 | up   | 1.57 | up   | 1.50 | up   | 2   |
| Os.6116.1.S1_x_at  | LOC_Os12g38150 | osmotin, putative, expressed                                                           | 1.17  | up   | 2.48 | up   | 2.21  | up   | 1.14 | up   | 1.59 | up   | 1.61 | up   | 2   |
| Os.6118.1.S1_at    | LOC_Os11g05700 | ABC transporter family protein, putative, expressed                                    | 1.26  | up   | 1.22 | down | 1.25  | up   | 1.39 | down | 2.50 | up   | 1.38 | up   | SA  |

|                   |                |                                                                                  |      |      |      |      |        |      |      |      |      |      |      |      |     |
|-------------------|----------------|----------------------------------------------------------------------------------|------|------|------|------|--------|------|------|------|------|------|------|------|-----|
| Os.6125.1.S1_at   | LOC_Os03g29190 | PDI, putative, expressed                                                         | 1.18 | down | 1.32 | down | 3.51   | down | 1.18 | up   | 2.11 | up   | 1.08 | down | 2   |
| Os.6133.1.S1_at   | LOC_Os02g51540 | eukaryotic aspartyl protease domain containing protein, expressed                | 1.13 | up   | 1.26 | down | 2.42   | up   | 1.03 | down | 1.12 | down | 1.19 | down | ABA |
| Os.6149.1.S1_at   | LOC_Os01g04580 | Ser/Thr protein kinase, putative, expressed                                      | 1.18 | down | 1.34 | up   | 3.02   | down | 1.25 | up   | 1.16 | up   | 1.15 | up   | ABA |
| Os.6150.1.S1_s_at | LOC_Os03g29240 | PDI, putative, expressed                                                         | 1.01 | down | 1.22 | up   | 1.43   | down | 1.34 | up   | 2.36 | up   | 1.12 | down | SA  |
| Os.6170.1.S1_at   | LOC_Os02g51060 | CSLA6 - cellulose synthase-like family A; mannan synthase, expressed             | 1.03 | up   | 1.23 | down | 2.45   | down | 1.26 | up   | 1.05 | up   | 1.48 | up   | ABA |
| Os.6176.1.S1_at   | LOC_Os08g43370 | 6-phosphogluconolactonase, putative, expressed                                   | 1.01 | down | 1.13 | down | 3.08   | up   | 1.04 | up   | 1.23 | up   | 1.01 | down | ABA |
| Os.6190.1.S1_at   | LOC_Os04g57890 | oligosaccharyl transferase, putative, expressed                                  | 1.26 | down | 1.21 | down | 2.09   | down | 1.12 | down | 1.26 | down | 1.04 | down | ABA |
| Os.6203.1.S1_at   | LOC_Os09g32250 | DNA repair ATPase-related, putative, expressed                                   | 1.13 | down | 1.04 | down | 2.36   | down | 1.05 | up   | 1.72 | down | 1.41 | down | ABA |
| Os.6207.1.S1_s_at | LOC_Os06g41840 | reductase, putative, expressed                                                   | 1.19 | up   | 1.18 | down | 2.05   | up   | 1.06 | up   | 1.80 | up   | 2.14 | up   | 2   |
| Os.6210.1.S1_at   | LOC_Os03g56270 | receptor protein kinase CLAVATA1 precursor, putative, expressed                  | 1.18 | down | 1.25 | up   | 2.10   | down | 1.30 | down | 1.32 | down | 1.51 | down | ABA |
| Os.623.1.S1_at    | AK102403       | Oryza sativa Japonica Group cDNA clone:J033092K06, full insert sequence.         | 1.71 | up   | 1.18 | up   | 8.10   | up   | 1.02 | up   | 1.24 | up   | 1.03 | up   | ABA |
| Os.623.1.S1_x_at  | LOC_Os01g09640 | Myb transcription factor, putative, expressed                                    | 1.96 | up   | 1.09 | down | 8.31   | up   | 1.32 | down | 1.15 | down | 1.05 | down | ABA |
| Os.623.2.S1_x_at  | LOC_Os01g09640 | Myb transcription factor, putative, expressed                                    | 1.63 | up   | 1.13 | down | 5.71   | up   | 1.21 | down | 1.17 | up   | 1.05 | up   | ABA |
| Os.623.3.S1_x_at  | LOC_Os01g09640 | Myb transcription factor, putative, expressed                                    | 1.75 | up   | 1.15 | down | 7.56   | up   | 1.27 | down | 1.21 | up   | 1.11 | up   | ABA |
| Os.625.1.S1_at    | LOC_Os01g09670 | pollen-specific protein SF21, putative, expressed                                | 1.24 | down | 1.17 | up   | 1.25   | down | 1.49 | down | 1.50 | down | 2.41 | up   | JA  |
| Os.6269.1.S1_at   | LOC_Os03g19090 | expressed protein                                                                | 1.13 | down | 1.07 | up   | 2.10   | up   | 1.01 | up   | 1.14 | up   | 1.08 | up   | ABA |
| Os.6274.1.S1_at   | LOC_Os05g47730 | LTP153 - Protease inhibitor/seed storage/LTP family protein precursor, expressed | 1.83 | up   | 1.33 | up   | 19.58  | up   | 1.40 | down | 1.70 | up   | 1.03 | up   | ABA |
| Os.6291.1.S1_at   | LOC_Os06g47600 | thaumatin family domain containing protein, expressed                            | 1.17 | down | 1.12 | down | 3.16   | down | 1.18 | up   | 1.21 | down | 1.11 | up   | ABA |
| Os.6291.1.S1_x_at | LOC_Os06g47600 | thaumatin family domain containing protein, expressed                            | 1.21 | down | 1.11 | down | 3.89   | down | 1.05 | up   | 1.40 | down | 1.01 | down | ABA |
| Os.6297.1.S1_at   | LOC_Os02g45700 | fringe-related protein, putative, expressed                                      | 1.35 | up   | 1.15 | up   | 5.47   | up   | 1.66 | down | 1.11 | down | 1.17 | down | ABA |
| Os.6297.2.S1_at   | LOC_Os02g45700 | fringe-related protein, putative, expressed                                      | 1.04 | up   | 1.05 | down | 5.76   | up   | 1.02 | up   | 1.04 | up   | 1.00 | down | ABA |
| Os.6310.1.S1_at   | LOC_Os05g11140 | CK1_CaseinKinase_1a.5 - CK1 includes the casein kinase 1 kinases, expressed      | 1.07 | down | 1.06 | down | 2.32   | up   | 1.00 | up   | 1.22 | up   | 1.10 | down | ABA |
| Os.6313.1.S1_at   | LOC_Os04g52370 | UTP--glucose-1-phosphate uridylyltransferase, putative, expressed                | 1.40 | down | 1.12 | down | 2.64   | down | 1.39 | down | 1.51 | down | 1.29 | down | ABA |
| Os.6314.1.S1_at   | LOC_Os04g33820 | OsFBX132 - F-box domain containing protein, expressed                            | 1.16 | down | 1.49 | down | 17.02  | up   | 1.38 | down | 2.38 | up   | 1.94 | up   | 2   |
| Os.6318.1.S1_at   | LOC_Os05g45020 | zinc finger/CCCH transcription factor, putative, expressed                       | 1.00 | down | 1.34 | up   | 9.94   | up   | 2.21 | up   | 1.41 | up   | 2.11 | down | 3   |
| Os.6328.1.S1_at   | LOC_Os04g41570 | ethylene-responsive protein related, putative, expressed                         | 1.55 | up   | 1.02 | up   | 2.71   | up   | 1.11 | down | 1.54 | up   | 1.03 | down | ABA |
| Os.6330.1.S1_at   | LOC_Os03g07180 | embryonic protein DC-8, putative, expressed                                      | 1.30 | down | 1.05 | up   | 292.94 | up   | 1.02 | up   | 1.75 | up   | 1.16 | up   | ABA |
| Os.6335.1.S1_at   | LOC_Os11g13670 | gibberellin receptor GID1L2, putative, expressed                                 | 1.16 | up   | 1.15 | down | 3.35   | up   | 1.06 | up   | 1.13 | up   | 1.14 | down | ABA |
| Os.6345.1.S1_at   | LOC_Os06g36560 | inositol oxygenase, putative, expressed                                          | 1.30 | down | 1.02 | up   | 2.17   | down | 1.05 | up   | 1.24 | down | 1.17 | up   | ABA |
| Os.6363.1.S1_at   | LOC_Os10g38080 | OsSub61 - Putative Subtilisin homologue, expressed                               | 1.53 | up   | 1.09 | down | 10.80  | up   | 1.14 | down | 1.22 | up   | 1.90 | down | ABA |
| Os.6364.1.S1_at   | LOC_Os10g27170 | calmodulin-binding protein, putative, expressed                                  | 4.33 | up   | 1.05 | down | 2.26   | up   | 1.35 | down | 1.27 | down | 1.31 | down | 2   |
| Os.6365.1.S1_at   | LOC_Os05g09380 | AR791, putative, expressed                                                       | 1.17 | up   | 1.16 | down | 2.30   | up   | 1.02 | down | 1.38 | up   | 1.12 | up   | ABA |
| Os.6381.1.S1_at   | LOC_Os08g40590 | oxysterol-binding protein, putative, expressed                                   | 1.46 | up   | 1.30 | up   | 3.50   | up   | 1.09 | up   | 3.58 | up   | 1.32 | up   | 2   |
| Os.6398.1.S1_at   | LOC_Os04g56750 | zinc finger C-x8-C-x5-C-x3-H type family protein, expressed                      | 1.06 | up   | 1.14 | up   | 2.45   | up   | 1.14 | up   | 1.25 | up   | 1.02 | up   | ABA |
| Os.6417.1.S1_at   | LOC_Os07g37850 | expressed protein                                                                | 1.04 | up   | 1.00 | up   | 2.46   | down | 1.10 | down | 1.08 | down | 1.17 | up   | ABA |
| Os.6418.1.S1_at   | LOC_Os01g07530 | uncharacterized glycosyltransferase, putative, expressed                         | 1.16 | down | 1.30 | up   | 3.26   | up   | 1.05 | down | 1.18 | down | 1.17 | up   | ABA |
| Os.6444.2.S1_x_at | LOC_Os10g23100 | ras-related protein, putative, expressed                                         | 1.11 | up   | 1.05 | up   | 2.44   | down | 1.07 | down | 1.47 | down | 1.03 | up   | ABA |
| Os.6450.1.S1_at   | LOC_Os07g09190 | transketolase, putative, expressed                                               | 1.24 | down | 1.12 | down | 1.25   | down | 1.06 | up   | 1.45 | down | 3.72 | up   | JA  |
| Os.6517.1.S1_at   | LOC_Os08g37432 | MATE efflux family protein, putative, expressed                                  | 1.08 | up   | 1.66 | up   | 2.24   | down | 1.26 | up   | 1.43 | up   | 1.85 | up   | ABA |
| Os.6539.1.S1_at   | LOC_Os04g44670 | AP2 domain containing protein, expressed                                         | 1.15 | down | 4.81 | down | 7.25   | down | 1.00 | up   | 1.16 | up   | 1.32 | up   | 2   |
| Os.6561.1.A1_at   | AU165189       |                                                                                  | 1.67 | up   | 1.21 | up   | 5.33   | up   | 1.03 | down | 1.02 | up   | 2.46 | up   | 2   |
| Os.6573.1.S1_at   | LOC_Os11g19100 | retrotransposon protein, putative, unclassified                                  | 1.09 | down | 1.03 | up   | 3.34   | up   | 1.22 | up   | 1.21 | up   | 1.16 | up   | ABA |
| Os.6581.1.S1_at   | LOC_Os10g43060 | expressed protein                                                                | 1.28 | up   | 1.14 | up   | 1.52   | up   | 1.19 | up   | 2.70 | up   | 2.03 | up   | 2   |
| Os.6585.1.S1_at   | LOC_Os04g53210 | hydroxyacid oxidase 1, putative, expressed                                       | 1.01 | up   | 1.28 | down | 2.51   | up   | 1.24 | up   | 2.70 | up   | 1.03 | up   | 2   |
| Os.6617.1.S1_s_at | LOC_Os09g15520 | oleosin, putative, expressed                                                     | 1.01 | down | 1.00 | down | 54.91  | up   | 1.01 | up   | 1.01 | up   | 1.03 | up   | ABA |
| Os.6618.1.S1_at   | LOC_Os04g49980 | late embryogenesis abundant group 1, putative, expressed                         | 1.49 | up   | 1.76 | up   | 30.51  | up   | 1.16 | down | 1.00 | down | 1.47 | down | ABA |
| Os.6625.1.S1_x_at | LOC_Os09g27830 | OsPDIL2-3 protein disulfide isomerase PDIL2-3, expressed                         | 1.44 | down | 1.05 | down | 2.57   | down | 1.12 | up   | 1.32 | down | 1.21 | up   | ABA |
| Os.6633.1.S1_at   | LOC_Os07g10530 | carboxyl-terminal peptidase, putative, expressed                                 | 1.43 | down | 1.29 | down | 2.69   | down | 1.01 | down | 1.24 | down | 1.13 | down | ABA |
| Os.6648.1.S1_at   | LOC_Os03g45420 | armadillo/beta-catenin repeat family protein, putative, expressed                | 1.24 | down | 1.12 | down | 2.38   | up   | 1.71 | up   | 1.18 | up   | 1.07 | up   | ABA |
| Os.6649.1.S1_at   | LOC_Os01g74110 | metal cation transporter, putative, expressed                                    | 1.27 | down | 1.47 | down | 3.31   | down | 1.12 | up   | 1.64 | down | 1.65 | down | ABA |
| Os.6651.1.S1_at   | LOC_Os07g43670 | ribonuclease T2 family domain containing protein, expressed                      | 1.60 | down | 1.07 | down | 12.41  | down | 1.17 | up   | 1.28 | down | 1.22 | down | ABA |
| Os.6652.1.S1_x_at | LOC_Os10g39200 | expressed protein                                                                | 1.05 | up   | 1.05 | down | 2.21   | up   | 1.18 | up   | 1.30 | up   | 1.23 | up   | ABA |
| Os.6656.1.S1_at   | LOC_Os02g18410 | salt stress root protein RS1, putative, expressed                                | 1.03 | down | 1.38 | down | 1.65   | down | 1.30 | up   | 1.40 | down | 3.52 | down | JA  |
| Os.6662.1.S1_at   | LOC_Os05g44900 | expressed protein                                                                | 1.33 | up   | 1.20 | up   | 13.51  | up   | 1.69 | down | 1.05 | down | 1.35 | down | ABA |
| Os.6669.1.S1_at   | LOC_Os07g40890 | igA FC receptor precursor, putative, expressed                                   | 1.24 | up   | 1.21 | up   | 2.56   | up   | 1.11 | down | 1.02 | up   | 1.04 | down | ABA |

|                   |                |                                                                                   |      |      |      |      |       |      |      |      |       |      |      |      |     |
|-------------------|----------------|-----------------------------------------------------------------------------------|------|------|------|------|-------|------|------|------|-------|------|------|------|-----|
| Os.6671.1.S1_a_at | LOC_Os05g39930 | spotted leaf 11, putative, expressed                                              | 1.06 | down | 1.02 | down | 3.66  | up   | 1.12 | up   | 1.49  | up   | 1.91 | up   | ABA |
| Os.6671.2.S1_x_at | LOC_Os05g39930 | spotted leaf 11, putative, expressed                                              | 1.19 | down | 1.00 | down | 3.70  | up   | 1.15 | up   | 1.64  | up   | 1.76 | up   | ABA |
| Os.6763.1.S1_at   | LOC_Os01g48710 | heavy metal-associated domain containing protein, expressed                       | 1.65 | down | 1.08 | up   | 6.16  | down | 1.02 | up   | 1.60  | down | 2.04 | down | 2   |
| Os.6763.1.S1_x_at | LOC_Os01g48710 | heavy metal-associated domain containing protein, expressed                       | 1.82 | down | 1.01 | down | 5.92  | down | 1.03 | up   | 1.56  | down | 1.98 | down | ABA |
| Os.6764.1.S1_at   | AK241357       | Oryza sativa Japonica Group cDNA, clone: J065151B01, full insert sequence.        | 5.30 | down | 1.95 | up   | 7.28  | down | 1.37 | up   | 6.41  | down | 4.46 | down | 4   |
| Os.6764.2.S1_at   | AK241357       | Oryza sativa Japonica Group cDNA, clone: J065151B01, full insert sequence.        | 1.17 | down | 1.07 | down | 4.31  | up   | 1.51 | up   | 1.16  | down | 2.42 | down | 2   |
| Os.6766.1.S1_s_at | LOC_Os04g48840 | expressed protein                                                                 | 1.14 | down | 1.26 | down | 2.60  | down | 1.10 | down | 1.63  | down | 1.03 | down | ABA |
| Os.6767.1.S1_at   | LOC_Os08g16830 | retrotransposon protein, putative, SINE subclass, expressed                       | 1.88 | up   | 1.86 | up   | 4.68  | down | 1.70 | down | 1.49  | down | 1.29 | down | ABA |
| Os.6776.1.S1_at   | LOC_Os07g35480 | glucan endo-1,3-beta-glucosidase precursor, putative, expressed                   | 2.39 | down | 1.06 | up   | 10.51 | down | 2.61 | up   | 1.44  | down | 2.63 | up   | 4   |
| Os.6786.1.S1_a_at | LOC_Os10g40720 | expansin precursor, putative, expressed                                           | 1.33 | up   | 1.54 | up   | 10.88 | down | 1.01 | up   | 1.87  | down | 1.11 | down | ABA |
| Os.6801.2.S1_x_at | LOC_Os02g02040 | protein kinase, putative, expressed                                               | 1.40 | down | 1.39 | down | 2.01  | down | 1.24 | down | 1.26  | down | 1.05 | down | ABA |
| Os.6822.1.S1_at   | LOC_Os08g02670 | ATP binding protein, putative, expressed                                          | 1.28 | down | 1.03 | up   | 3.92  | up   | 1.18 | up   | 1.25  | up   | 1.37 | down | ABA |
| Os.6823.1.S1_at   | LOC_Os01g62350 | 60S ribosomal protein L36-2, putative, expressed                                  | 1.00 | down | 1.08 | up   | 2.48  | down | 1.09 | up   | 1.22  | down | 1.06 | down | ABA |
| Os.6832.1.S1_at   | LOC_Os01g24700 | expressed protein                                                                 | 1.64 | up   | 1.00 | up   | 28.46 | up   | 1.12 | down | 1.68  | up   | 1.12 | down | ABA |
| Os.6838.1.S1_at   | LOC_Os10g40510 | LTP144 - Protease inhibitor/seed storage/LTP family protein precursor, expressed  | 1.28 | down | 1.31 | up   | 2.40  | down | 1.71 | up   | 1.58  | down | 1.19 | down | ABA |
| Os.6840.1.S1_at   | LOC_Os09g31454 | MYB family transcription factor, putative, expressed                              | 1.15 | up   | 1.21 | down | 3.29  | up   | 1.09 | up   | 1.60  | up   | 1.23 | up   | ABA |
| Os.6851.1.S1_at   | LOC_Os02g35590 | glutathione S-transferase, putative, expressed                                    | 1.18 | down | 1.12 | down | 2.74  | up   | 1.11 | up   | 1.38  | up   | 1.57 | up   | ABA |
| Os.6861.1.S1_at   | AK062784       | Oryza sativa Japonica Group cDNA clone:001-107-B06, full insert sequence.         | 1.34 | up   | 1.08 | up   | 4.31  | up   | 1.32 | down | 1.27  | up   | 1.09 | up   | ABA |
| Os.6862.2.A1_at   | LOC_Os09g23550 | dehydrogenase, putative, expressed                                                | 1.06 | up   | 1.25 | up   | 2.64  | down | 1.01 | up   | 1.34  | down | 1.28 | down | ABA |
| Os.6868.1.S1_at   | LOC_Os03g43420 | single-stranded DNA-binding protein, putative, expressed                          | 1.18 | up   | 1.31 | up   | 3.06  | down | 1.05 | down | 1.79  | down | 1.23 | down | ABA |
| Os.6960.1.S1_at   | LOC_Os06g39880 | cytochrome P450 72A1, putative                                                    | 5.45 | up   | 1.53 | down | 2.18  | up   | 1.02 | up   | 1.64  | up   | 1.69 | up   | 2   |
| Os.6965.1.S1_at   | AK099476       | sodium-inducible calcium-binding protein (ACP1)                                   | 2.83 | up   | 1.34 | up   | 1.84  | down | 1.01 | down | 1.60  | up   | 1.24 | down | IAA |
| Os.6998.1.S1_at   | LOC_Os03g37490 | MATE efflux family protein, putative, expressed                                   | 2.08 | up   | 1.11 | down | 3.42  | up   | 1.02 | up   | 8.67  | up   | 2.95 | up   | 4   |
| Os.7028.1.S1_at   | LOC_Os02g45710 | zinc finger, C3HC4 type domain containing protein, expressed                      | 1.06 | down | 1.63 | up   | 7.31  | down | 1.23 | up   | 1.84  | down | 1.02 | down | ABA |
| Os.7052.1.S1_at   | LOC_Os02g58220 | RPA2A - Putative single-stranded DNA binding complex subunit 2, expressed         | 1.25 | down | 1.15 | down | 4.77  | down | 1.26 | down | 2.11  | down | 1.76 | down | 2   |
| Os.7053.1.S1_s_at | LOC_Os01g65380 | patellin protein, putative, expressed                                             | 1.08 | up   | 1.12 | down | 2.55  | up   | 1.22 | up   | 1.09  | up   | 1.06 | up   | ABA |
| Os.7058.1.S1_at   | LOC_Os04g50060 | GRAS family transcription factor domain containing protein, expressed             | 1.15 | down | 1.26 | down | 1.84  | up   | 2.07 | up   | 1.35  | up   | 1.20 | down | ACC |
| Os.7081.1.S1_at   | LOC_Os06g20430 | BPI/LBP family protein At3g20270 precursor, putative, expressed                   | 1.09 | down | 1.12 | down | 2.91  | up   | 1.19 | up   | 1.32  | up   | 1.18 | up   | ABA |
| Os.7087.1.S1_at   | LOC_Os02g12690 | cytochrome P450, putative, expressed                                              | 1.81 | down | 1.27 | down | 63.34 | down | 1.16 | down | 2.95  | down | 1.76 | up   | 2   |
| Os.7088.1.S1_at   | LOC_Os07g01440 | plastocyanin-like domain containing protein, putative, expressed                  | 3.17 | down | 3.06 | down | 5.54  | down | 1.59 | down | 2.69  | down | 2.33 | down | 5   |
| Os.7095.1.S1_at   | LOC_Os04g49210 | naringenin.2-oxoglutarate 3-dioxygenase, putative, expressed                      | 1.30 | up   | 1.02 | down | 2.37  | down | 1.73 | up   | 16.39 | up   | 2.88 | up   | 3   |
| Os.7101.1.S1_at   | LOC_Os12g16200 | glutathione synthetase, chloroplast precursor, putative, expressed                | 1.02 | down | 1.25 | up   | 2.43  | down | 1.43 | down | 2.01  | down | 1.09 | up   | 2   |
| Os.7116.1.S1_at   | LOC_Os03g53020 | helix-loop-helix DNA-binding domain containing protein, expressed                 | 1.05 | down | 1.38 | up   | 2.40  | down | 1.18 | up   | 1.17  | up   | 2.91 | up   | 2   |
| Os.7126.1.S1_at   | LOC_Os01g18050 | tubulin/FtsZ domain containing protein, putative, expressed                       | 1.09 | down | 1.05 | down | 2.58  | down | 1.21 | down | 1.59  | down | 1.44 | down | ABA |
| Os.7132.1.S1_at   | LOC_Os09g39560 | genetic modifier, putative, expressed                                             | 1.07 | up   | 1.35 | down | 2.47  | up   | 1.14 | up   | 1.28  | up   | 1.21 | up   | ABA |
| Os.7136.2.S1_x_at | LOC_Os01g27750 | bifunctional 3-dehydroquinate dehydratase                                         | 1.09 | up   | 1.03 | up   | 1.17  | up   | 1.11 | up   | 2.17  | up   | 1.99 | up   | SA  |
| Os.7140.1.S1_at   | LOC_Os11g16550 | uncharacterized protein ycf53, putative, expressed                                | 1.05 | down | 1.07 | up   | 6.28  | down | 1.31 | down | 1.70  | down | 1.56 | down | ABA |
| Os.7158.1.S1_a_at | LOC_Os07g14270 | calreticulin precursor protein, putative, expressed                               | 1.15 | down | 1.01 | up   | 2.38  | down | 1.07 | up   | 1.18  | down | 1.16 | up   | ABA |
| Os.7189.1.S1_at   | LOC_Os11g04010 | ICE-like protease p20 domain containing protein, putative, expressed              | 1.09 | up   | 1.16 | up   | 6.04  | up   | 1.11 | up   | 1.36  | down | 1.35 | down | ABA |
| Os.7192.1.S1_at   | LOC_Os03g04410 | aconitate hydratase protein, putative, expressed                                  | 1.15 | up   | 1.14 | down | 2.26  | up   | 1.27 | up   | 2.95  | up   | 2.03 | up   | 3   |
| Os.72.1.S1_at     | LOC_Os01g16350 | hydroxymethylglutaryl-CoA lyase, putative, expressed                              | 1.27 | down | 1.08 | down | 4.16  | up   | 1.33 | up   | 1.74  | up   | 1.28 | up   | ABA |
| Os.72.1.S1_s_at   | LOC_Os01g16350 | hydroxymethylglutaryl-CoA lyase, putative, expressed                              | 1.32 | down | 1.02 | down | 3.48  | up   | 1.19 | up   | 1.74  | up   | 1.20 | up   | ABA |
| Os.72.1.S1_x_at   | LOC_Os01g16350 | hydroxymethylglutaryl-CoA lyase, putative, expressed                              | 1.10 | down | 1.13 | down | 5.00  | up   | 1.43 | up   | 1.77  | up   | 1.67 | up   | ABA |
| Os.7203.1.S1_at   | LOC_Os01g63230 | growth regulator related protein, putative, expressed                             | 1.56 | up   | 1.85 | down | 3.35  | up   | 1.48 | down | 1.38  | up   | 1.22 | up   | ABA |
| Os.7203.2.S1_x_at | LOC_Os01g63230 | growth regulator related protein, putative, expressed                             | 1.96 | up   | 2.11 | down | 4.01  | up   | 1.97 | down | 1.39  | up   | 1.27 | up   | 3   |
| Os.7218.2.S1_at   | LOC_Os02g01140 | GDSL-like lipase/acylhydrolase, putative, expressed                               | 1.10 | up   | 1.20 | down | 3.90  | down | 1.23 | down | 1.10  | down | 1.27 | down | ABA |
| Os.7225.1.S1_at   | LOC_Os06g05740 | expressed protein                                                                 | 1.64 | down | 1.14 | up   | 4.07  | down | 1.20 | up   | 1.26  | down | 1.33 | up   | ABA |
| Os.7228.1.S1_at   | LOC_Os02g51970 | phosphate-induced protein 1 conserved region domain containing protein, expressed | 5.93 | up   | 2.57 | up   | 9.80  | up   | 1.07 | down | 1.41  | up   | 3.94 | down | 4   |
| Os.7229.1.S1_at   | LOC_Os02g50210 | erwinia induced protein 2, putative, expressed                                    | 1.03 | up   | 1.02 | up   | 2.75  | up   | 1.12 | down | 1.18  | up   | 1.07 | down | ABA |
| Os.7235.1.S1_at   | LOC_Os03g21030 | no apical meristem protein, putative, expressed                                   | 1.58 | up   | 1.03 | up   | 2.59  | up   | 1.41 | up   | 1.10  | up   | 1.50 | up   | ABA |
| Os.7242.1.S1_at   | LOC_Os07g07930 | LTP178 - Protease inhibitor/seed storage/LTP family protein precursor, expressed  | 1.24 | up   | 1.14 | down | 3.65  | up   | 1.16 | down | 1.73  | up   | 1.09 | down | ABA |
| Os.7243.1.S1_s_at | LOC_Os08g06250 | tetraspanin family protein, putative, expressed                                   | 1.01 | up   | 1.05 | down | 2.23  | up   | 1.01 | down | 1.32  | up   | 1.18 | up   | ABA |
| Os.7246.1.S1_s_at | LOC_Os06g27560 | glycosyltransferase protein, putative, expressed                                  | 1.47 | up   | 1.13 | down | 2.39  | up   | 1.49 | up   | 1.62  | up   | 1.38 | up   | ABA |
| Os.7246.2.S1_s_at | LOC_Os06g27560 | glycosyltransferase protein, putative, expressed                                  | 2.00 | up   | 1.07 | down | 2.57  | up   | 1.40 | up   | 1.61  | up   | 1.57 | up   | ABA |
| Os.7253.1.S1_at   | LOC_Os12g28770 | POE119 - Pollen Ole e I allergen and extensin family protein precursor, expressed | 1.18 | down | 1.09 | up   | 3.89  | down | 1.25 | down | 1.42  | down | 1.98 | down | ABA |

|                   |                |                                                                                      |       |      |      |      |       |      |      |      |       |      |      |      |     |
|-------------------|----------------|--------------------------------------------------------------------------------------|-------|------|------|------|-------|------|------|------|-------|------|------|------|-----|
| Os.7258.1.S1_at   | LOC_Os03g21850 | nucleotidyltransferase, putative, expressed                                          | 1.13  | up   | 1.31 | down | 2.21  | up   | 1.02 | down | 1.06  | up   | 1.01 | down | ABA |
| Os.7269.1.S1_s_at | LOC_Os01g44960 | hydrolase, alpha/beta fold family domain containing protein, expressed               | 2.01  | up   | 1.04 | up   | 5.18  | up   | 2.50 | down | 2.48  | up   | 1.06 | up   | 4   |
| Os.7281.1.S1_at   | LOC_Os01g68730 | RNA-binding protein FUS, putative, expressed                                         | 1.20  | up   | 1.12 | up   | 13.07 | down | 1.87 | up   | 1.22  | up   | 1.83 | up   | ABA |
| Os.7285.1.S1_at   | LOC_Os05g44210 | trehalose-6-phosphate synthase, putative, expressed                                  | 1.00  | up   | 2.33 | up   | 1.25  | down | 1.04 | up   | 1.26  | down | 1.01 | down | BAP |
| Os.7289.2.S1_at   | LOC_Os02g11760 | pleiotropic drug resistance protein, putative, expressed                             | 1.13  | up   | 1.24 | down | 2.41  | up   | 1.01 | up   | 1.17  | up   | 1.09 | up   | ABA |
| Os.7299.1.S1_at   | LOC_Os05g01460 | STIP1 homology and U box-containing protein 1, putative, expressed                   | 1.18  | up   | 1.19 | up   | 3.12  | up   | 1.02 | up   | 1.24  | up   | 1.15 | down | ABA |
| Os.7314.1.S1_at   | LOC_Os10g22520 | cellulase, putative, expressed                                                       | 1.08  | up   | 1.03 | down | 2.48  | up   | 2.47 | up   | 2.39  | up   | 1.52 | up   | 3   |
| Os.7317.2.S1_at   | LOC_Os01g68589 | LTPL39 - Protease inhibitor/seed storage/LTP family protein precursor, expressed     | 1.01  | down | 1.24 | down | 3.98  | down | 1.23 | down | 1.98  | down | 1.87 | down | ABA |
| Os.7335.1.S1_at   | LOC_Os02g36340 | riboflavin biosynthesis protein ribAB, chloroplast precursor, putative, expressed    | 3.00  | up   | 1.26 | up   | 1.00  | down | 1.32 | up   | 2.56  | up   | 1.60 | up   | 2   |
| Os.7337.1.S1_at   | LOC_Os12g32650 | expressed protein                                                                    | 1.01  | up   | 1.04 | down | 1.66  | up   | 1.03 | down | 2.06  | up   | 1.06 | up   | SA  |
| Os.7339.1.S1_at   | LOC_Os10g31850 | RING finger and CHY zinc finger domain-containing protein 1, putative, expressed     | 1.08  | down | 1.04 | up   | 2.80  | up   | 1.15 | down | 1.06  | up   | 1.15 | down | ABA |
| Os.7339.2.S1_at   | LOC_Os10g31850 | RING finger and CHY zinc finger domain-containing protein 1, putative, expressed     | 1.11  | down | 1.24 | up   | 2.41  | up   | 1.13 | down | 1.04  | up   | 1.00 | down | ABA |
| Os.7342.1.S1_at   | LOC_Os02g57490 | DUF260 domain containing protein, putative, expressed                                | 9.70  | up   | 1.76 | down | 1.11  | up   | 1.23 | up   | 2.53  | up   | 1.67 | up   | 2   |
| Os.7343.1.S1_at   | LOC_Os07g02710 | expressed protein                                                                    | 1.11  | up   | 1.04 | down | 19.39 | up   | 1.16 | down | 1.04  | up   | 1.36 | down | ABA |
| Os.7344.1.S1_at   | LOC_Os02g52000 | phosphate-induced protein 1 conserved region domain containing protein, expressed    | 3.59  | up   | 1.68 | up   | 1.50  | up   | 1.17 | down | 2.03  | down | 3.31 | down | 3   |
| Os.7355.1.S1_at   | LOC_Os02g13520 | OslAA7 - Auxin-responsive Aux/IAA gene family member, expressed                      | 1.72  | down | 1.28 | up   | 2.40  | down | 1.57 | down | 1.14  | down | 1.32 | down | ABA |
| Os.7360.1.S1_a_at | LOC_Os01g68370 | B3 DNA binding domain containing protein, expressed                                  | 1.30  | down | 1.27 | down | 18.22 | up   | 1.00 | up   | 1.01  | down | 1.02 | up   | ABA |
| Os.7362.1.S1_at   | LOC_Os07g48550 | no apical meristem protein, putative, expressed                                      | 1.17  | up   | 1.42 | down | 7.85  | up   | 1.43 | up   | 1.51  | up   | 1.61 | up   | ABA |
| Os.7366.1.S1_at   | LOC_Os05g38270 | regulator of chromosome condensation, putative, expressed                            | 1.83  | down | 1.35 | down | 2.52  | up   | 1.26 | down | 1.06  | up   | 1.42 | down | ABA |
| Os.7371.1.S1_s_at | LOC_Os03g02380 | major facilitator superfamily domain-containing protein 5, putative, expressed       | 1.07  | down | 1.05 | down | 2.20  | down | 1.09 | down | 1.01  | down | 1.30 | up   | ABA |
| Os.7381.1.S1_at   | LOC_Os05g02770 | glycine-rich cell wall structural protein precursor, putative, expressed             | 1.11  | down | 1.03 | down | 4.39  | up   | 1.23 | down | 2.19  | up   | 1.10 | up   | 2   |
| Os.7393.1.S1_at   | LOC_Os07g02200 | plastocyanin-like domain containing protein, putative, expressed                     | 1.29  | down | 1.37 | down | 4.20  | down | 1.38 | down | 1.45  | down | 1.34 | down | ABA |
| Os.7428.1.S1_at   | LOC_Os06g44470 | pollen allergen, putative, expressed                                                 | 16.01 | up   | 2.52 | up   | 1.22  | up   | 1.07 | up   | 1.28  | down | 1.26 | down | 2   |
| Os.7439.1.S1_at   | LOC_Os05g32230 | expressed protein                                                                    | 1.38  | down | 1.07 | down | 2.84  | down | 1.04 | down | 1.29  | down | 1.07 | down | ABA |
| Os.7443.1.S1_s_at | LOC_Os03g02020 | stress responsive A/B Barrel domain containing protein, expressed                    | 1.37  | up   | 1.28 | up   | 2.42  | down | 1.25 | down | 1.41  | down | 1.39 | down | ABA |
| Os.7445.1.S1_at   | LOC_Os04g39489 | amino acid transporter, putative, expressed                                          | 1.07  | down | 1.28 | up   | 2.12  | up   | 1.21 | down | 1.44  | down | 1.08 | up   | ABA |
| Os.7457.1.S1_a_at | LOC_Os04g42520 | phosphoribosyl transferase, putative, expressed                                      | 1.06  | down | 2.74 | up   | 3.24  | down | 1.12 | up   | 1.76  | down | 2.21 | down | 3   |
| Os.7459.1.S1_at   | LOC_Os08g02690 | MA3 domain containing protein, expressed                                             | 1.01  | down | 1.03 | up   | 3.36  | up   | 1.00 | down | 1.04  | down | 1.01 | down | ABA |
| Os.7472.1.S1_at   | LOC_Os03g10750 | CUE domain containing protein, expressed                                             | 1.00  | down | 1.02 | up   | 2.50  | up   | 1.28 | up   | 1.53  | up   | 1.46 | up   | ABA |
| Os.7494.1.S1_at   | LOC_Os02g32060 | hydrolase, NUDIX family, domain containing protein, expressed                        | 1.17  | down | 1.12 | up   | 11.03 | down | 1.33 | up   | 1.87  | up   | 2.17 | down | 2   |
| Os.7499.1.S1_at   | LOC_Os07g01660 | dirigent, putative, expressed                                                        | 1.06  | down | 1.01 | down | 2.24  | down | 1.15 | down | 1.28  | down | 1.01 | up   | ABA |
| Os.7506.1.S1_at   | LOC_Os02g47450 | expressed protein                                                                    | 1.04  | down | 1.36 | up   | 2.85  | down | 1.20 | up   | 1.18  | down | 1.31 | down | ABA |
| Os.7507.1.S1_at   | LOC_Os10g02880 | O-methyltransferase, putative, expressed                                             | 1.57  | up   | 1.08 | up   | 31.07 | up   | 5.74 | down | 2.20  | up   | 3.73 | up   | 4   |
| Os.7510.1.S1_at   | LOC_Os10g41020 | flavonol synthase/flavanone 3-hydroxylase, putative, expressed                       | 1.49  | up   | 2.07 | up   | 1.99  | down | 1.49 | up   | 1.92  | up   | 1.53 | up   | BAP |
| Os.7516.1.S1_at   | LOC_Os05g43390 | signal recognition particle 54 kDa protein, putative, expressed                      | 1.28  | up   | 1.17 | up   | 9.98  | up   | 1.10 | down | 1.38  | up   | 3.60 | up   | 2   |
| Os.7531.1.S1_at   | LOC_Os03g46260 | DUF581 domain containing protein, expressed                                          | 1.04  | down | 1.13 | down | 2.02  | down | 1.25 | down | 1.23  | down | 1.71 | down | ABA |
| Os.7535.1.S1_at   | LOC_Os01g32780 | universal stress protein domain containing protein, putative, expressed              | 1.18  | down | 1.24 | down | 10.42 | up   | 1.12 | down | 3.46  | up   | 1.22 | up   | 2   |
| Os.7537.1.S1_at   | LOC_Os04g36750 | hsp20/alpha crystallin family protein, putative, expressed                           | 1.31  | down | 1.46 | down | 1.00  | down | 1.11 | up   | 13.86 | up   | 1.03 | down | SA  |
| Os.7539.1.S1_at   | LOC_Os03g03320 | expressed protein                                                                    | 3.83  | up   | 1.04 | up   | 1.68  | up   | 1.66 | down | 1.02  | up   | 1.53 | down | IAA |
| Os.7583.1.S1_x_at | LOC_Os04g44740 | glycosyltransferase sugar-binding region containing DXD motif, putative, expressed   | 1.05  | down | 1.05 | down | 2.23  | down | 2.17 | down | 2.04  | down | 2.14 | down | 4   |
| Os.7587.1.S1_at   | LOC_Os09g36619 | expressed protein                                                                    | 2.42  | down | 1.27 | down | 4.68  | down | 1.09 | up   | 1.43  | down | 1.73 | up   | 2   |
| Os.7602.1.S1_at   | LOC_Os02g44108 | expansin precursor, putative, expressed                                              | 1.76  | up   | 2.23 | up   | 12.59 | down | 1.06 | up   | 3.18  | down | 1.02 | down | 3   |
| Os.7607.1.S1_at   | LOC_Os07g47480 | heavy metal-associated domain containing protein, expressed                          | 1.23  | down | 1.15 | up   | 1.94  | up   | 1.35 | down | 1.48  | down | 2.21 | down | JA  |
| Os.7609.1.S1_at   | LOC_Os05g32110 | COBRA, putative, expressed                                                           | 1.10  | down | 1.05 | down | 2.15  | down | 1.01 | down | 1.38  | down | 1.48 | up   | ABA |
| Os.7611.1.S1_at   | LOC_Os03g06670 | Core histone H2A/H2B/H3/H4 domain containing protein, putative, expressed            | 1.14  | down | 1.21 | down | 4.24  | down | 1.34 | down | 1.83  | down | 1.51 | down | ABA |
| Os.7614.1.S1_at   | LOC_Os06g13600 | HEAT repeat family protein, putative, expressed                                      | 1.15  | up   | 1.01 | up   | 2.41  | down | 1.09 | down | 1.43  | down | 1.40 | down | ABA |
| Os.7625.1.A1_s_at | LOC_Os06g51360 | lysM domain containing protein, putative, expressed                                  | 1.23  | up   | 1.11 | up   | 2.04  | up   | 1.06 | up   | 1.05  | up   | 1.65 | up   | ABA |
| Os.7631.1.S1_at   | LOC_Os08g37130 | oxidoreductase, short chain dehydrogenase/reductase family domain containing protein | 1.37  | up   | 1.06 | down | 21.01 | up   | 1.20 | up   | 1.33  | up   | 1.05 | down | ABA |
| Os.7644.1.S1_at   | LOC_Os06g09630 | 3-oxoacyl-synthase, putative, expressed                                              | 1.07  | down | 1.09 | down | 2.13  | down | 1.08 | up   | 1.22  | down | 1.00 | up   | ABA |
| Os.7662.1.S1_at   | LOC_Os02g10350 | MLO domain containing protein, putative, expressed                                   | 1.58  | up   | 1.29 | up   | 2.52  | down | 2.02 | down | 1.67  | down | 1.28 | down | 2   |
| Os.7665.1.S1_at   | LOC_Os04g56240 | lipase, putative, expressed                                                          | 1.49  | down | 1.88 | up   | 4.83  | down | 1.29 | down | 1.60  | down | 1.50 | down | ABA |
| Os.7668.2.S1_x_at | LOC_Os04g17479 | expressed protein                                                                    | 1.07  | down | 1.12 | down | 2.06  | down | 1.60 | down | 1.25  | down | 1.04 | up   | ABA |
| Os.767.1.S1_at    | LOC_Os01g43700 | cytochrome P450 72A1, putative, expressed                                            | 2.72  | up   | 1.13 | up   | 4.56  | up   | 1.08 | up   | 3.41  | up   | 1.76 | up   | 3   |
| Os.7674.1.S1_at   | LOC_Os06g19070 | cytochrome P450, putative, expressed                                                 | 1.15  | up   | 1.49 | up   | 4.75  | down | 1.69 | up   | 1.04  | down | 1.24 | up   | ABA |
| Os.7680.1.S1_at   | LOC_Os07g04020 | expressed protein                                                                    | 1.51  | up   | 1.04 | up   | 2.07  | up   | 1.05 | down | 1.10  | up   | 1.31 | down | ABA |

|                   |                |                                                                                       |      |      |      |      |       |      |      |      |      |      |      |      |     |
|-------------------|----------------|---------------------------------------------------------------------------------------|------|------|------|------|-------|------|------|------|------|------|------|------|-----|
| Os.7692.1.S1_at   | LOC_Os04g55230 | tetratricopeptide repeat domain containing protein, putative, expressed               | 1.21 | up   | 1.24 | up   | 2.65  | down | 1.03 | down | 1.38 | down | 1.02 | down | ABA |
| Os.7694.1.S1_at   | LOC_Os04g41229 | helix-loop-helix DNA-binding domain containing protein, expressed                     | 1.32 | down | 1.30 | up   | 6.19  | down | 2.71 | up   | 1.47 | up   | 1.33 | down | 2   |
| Os.7699.1.S1_at   | AK120490       | Oryza sativa Japonica Group cDNA clone:J013118H09, full insert sequence.              | 1.08 | down | 1.12 | down | 3.93  | up   | 1.12 | down | 1.18 | down | 1.47 | down | ABA |
| Os.7705.1.S1_at   | LOC_Os04g54300 | wound induced protein, putative, expressed                                            | 1.79 | down | 1.04 | down | 2.20  | up   | 1.22 | up   | 1.23 | down | 2.20 | down | 2   |
| Os.7707.1.S1_at   | LOC_Os04g54320 | expressed protein                                                                     | 1.02 | down | 1.13 | up   | 3.41  | down | 1.15 | down | 1.69 | down | 1.61 | down | ABA |
| Os.7710.1.S1_a_at | LOC_Os09g29780 | expressed protein                                                                     | 1.01 | up   | 1.12 | up   | 2.09  | up   | 1.09 | down | 1.07 | down | 1.16 | down | ABA |
| Os.7727.1.S1_at   | LOC_Os05g11910 | GDSL-like lipase/acylhydrolase, putative, expressed                                   | 1.22 | up   | 1.04 | down | 3.31  | up   | 1.24 | up   | 1.64 | up   | 1.64 | up   | ABA |
| Os.7740.1.S1_at   | LOC_Os03g43650 | uncharacterized protein At4g06744 precursor, putative, expressed                      | 1.34 | up   | 1.62 | up   | 14.77 | down | 1.16 | down | 1.56 | down | 1.16 | up   | ABA |
| Os.7745.1.S1_at   | LOC_Os05g37700 | periplasmic beta-glucosidase precursor, putative, expressed                           | 1.21 | down | 1.26 | down | 2.70  | up   | 1.39 | down | 1.33 | up   | 1.43 | up   | ABA |
| Os.7750.1.S1_at   | LOC_Os02g06430 | DUF292 domain containing protein, expressed                                           | 1.24 | up   | 1.08 | down | 2.44  | up   | 1.11 | up   | 1.14 | up   | 1.04 | down | ABA |
| Os.7751.1.S1_at   | LOC_Os02g47660 | basic helix-loop-helix, putative, expressed                                           | 1.78 | up   | 1.08 | up   | 1.72  | up   | 1.64 | up   | 1.33 | up   | 2.90 | down | JA  |
| Os.7756.1.S1_at   | LOC_Os10g36500 | invertase/pectin methylesterase inhibitor family protein, putative, expressed         | 1.29 | down | 1.21 | up   | 4.03  | down | 1.05 | up   | 1.84 | down | 1.04 | down | ABA |
| Os.7756.2.S1_at   | LOC_Os10g36500 | invertase/pectin methylesterase inhibitor family protein, putative, expressed         | 1.50 | down | 1.11 | up   | 5.52  | down | 1.02 | down | 1.26 | down | 1.17 | down | ABA |
| Os.7756.2.S1_x_at | LOC_Os10g36500 | invertase/pectin methylesterase inhibitor family protein, putative, expressed         | 1.32 | down | 1.20 | up   | 7.50  | down | 1.09 | down | 1.52 | down | 1.24 | down | ABA |
| Os.7758.1.S1_at   | LOC_Os02g10480 | stromal membrane-associated protein, putative, expressed                              | 1.13 | down | 1.05 | up   | 2.09  | up   | 1.03 | down | 1.04 | down | 1.13 | up   | ABA |
| Os.7770.1.S1_at   | LOC_Os05g05030 | expressed protein                                                                     | 1.01 | down | 1.39 | down | 1.52  | up   | 1.35 | down | 1.00 | up   | 2.32 | up   | JA  |
| Os.7771.1.S1_at   | LOC_Os06g43600 | LTP129 - Protease inhibitor/seed storage/LTP family protein precursor, expressed      | 1.19 | up   | 1.34 | up   | 1.13  | down | 2.12 | up   | 1.03 | down | 1.29 | up   | ACC |
| Os.7773.1.S1_at   | LOC_Os09g32960 | expressed protein                                                                     | 1.05 | down | 1.00 | up   | 2.08  | up   | 1.13 | down | 1.17 | up   | 2.23 | up   | 2   |
| Os.7779.1.S1_x_at | LOC_Os05g01570 | auxin-induced protein 5NG4, putative, expressed                                       | 1.40 | down | 1.19 | down | 11.54 | down | 1.25 | up   | 1.95 | down | 2.72 | down | 2   |
| Os.7793.1.S1_at   | LOC_Os11g31570 | expressed protein                                                                     | 1.46 | down | 1.12 | up   | 4.73  | down | 1.01 | up   | 2.00 | down | 1.11 | up   | 2   |
| Os.7794.1.S1_at   | LOC_Os10g38489 | glutathione S-transferase GSTU6, putative, expressed                                  | 3.41 | up   | 1.73 | up   | 4.33  | up   | 1.41 | up   | 6.56 | up   | 2.91 | up   | 4   |
| Os.7800.1.S1_at   | LOC_Os01g58620 | expressed protein                                                                     | 1.10 | up   | 1.02 | down | 5.28  | up   | 1.06 | up   | 1.74 | up   | 1.37 | up   | ABA |
| Os.7801.1.S1_at   | LOC_Os12g05050 | stem-specific protein TSJT1, putative, expressed                                      | 1.14 | up   | 1.15 | down | 2.04  | up   | 1.04 | up   | 2.73 | up   | 1.30 | up   | 2   |
| Os.7805.1.S1_a_at | LOC_Os10g35110 | alpha-galactosidase precursor, putative, expressed                                    | 1.08 | down | 1.03 | up   | 2.87  | down | 1.35 | down | 1.52 | down | 1.57 | down | ABA |
| Os.7806.1.S1_at   | LOC_Os04g39980 | gibberellin 20 oxidase 2, putative, expressed                                         | 4.81 | up   | 1.07 | up   | 2.20  | up   | 1.13 | down | 2.04 | up   | 1.13 | up   | 3   |
| Os.7809.1.S1_at   | LOC_Os09g19890 | expressed protein                                                                     | 1.14 | up   | 1.17 | down | 4.07  | up   | 1.17 | up   | 1.31 | up   | 1.03 | down | ABA |
| Os.7826.2.A1_at   | LOC_Os05g10730 | ABC transporter, ATP-binding protein, putative, expressed                             | 1.25 | down | 1.15 | down | 1.97  | up   | 1.12 | down | 2.02 | up   | 1.34 | up   | SA  |
| Os.7830.1.S1_at   | LOC_Os04g16970 | zinc finger, C3HC4 type domain containing protein, expressed                          | 1.42 | up   | 1.31 | up   | 2.02  | down | 1.44 | down | 1.48 | down | 1.07 | down | ABA |
| Os.7831.1.S1_at   | LOC_Os06g11980 | DUF581 domain containing protein, expressed                                           | 1.30 | up   | 1.51 | down | 5.30  | up   | 1.35 | down | 1.57 | up   | 1.25 | up   | ABA |
| Os.7838.1.S1_at   | LOC_Os09g20930 | expressed protein                                                                     | 1.10 | down | 1.95 | down | 13.22 | up   | 1.01 | up   | 1.16 | up   | 1.07 | up   | ABA |
| Os.7853.1.S1_at   | LOC_Os01g58459 | expressed protein                                                                     | 1.15 | down | 1.23 | down | 2.66  | up   | 1.05 | up   | 1.12 | down | 1.24 | down | ABA |
| Os.7859.1.S1_at   | LOC_Os11g07916 | nifU, putative, expressed                                                             | 1.13 | down | 1.08 | up   | 2.51  | up   | 1.06 | up   | 1.65 | up   | 1.05 | up   | ABA |
| Os.7862.1.S1_at   | LOC_Os03g13840 | senescence-associated protein, putative, expressed                                    | 1.27 | up   | 1.43 | down | 7.84  | up   | 1.38 | down | 1.03 | down | 1.09 | down | ABA |
| Os.7868.1.S1_at   | LOC_Os01g17170 | magnesium-protoporphyrin IX monomethyl ester cyclase, chloroplast precursor, putative | 1.16 | down | 1.07 | up   | 4.53  | down | 1.27 | down | 2.59 | down | 1.73 | down | 2   |
| Os.7902.1.S1_at   | LOC_Os06g46950 | EF hand family protein, putative, expressed                                           | 3.15 | up   | 1.73 | up   | 5.16  | up   | 1.09 | down | 1.27 | up   | 1.66 | up   | 2   |
| Os.7911.1.S1_at   | LOC_Os01g27210 | glutathione S-transferase, putative, expressed                                        | 1.49 | up   | 1.11 | down | 1.73  | up   | 1.01 | down | 3.57 | up   | 2.91 | up   | 2   |
| Os.7928.1.S1_at   | LOC_Os03g48970 | nuclear transcription factor Y subunit, putative, expressed                           | 1.37 | up   | 1.47 | down | 4.72  | up   | 1.17 | down | 1.22 | up   | 1.01 | down | ABA |
| Os.7929.1.S1_a_at | LOC_Os02g12480 | expressed protein                                                                     | 1.08 | down | 1.05 | up   | 2.35  | down | 1.03 | down | 1.20 | down | 1.13 | down | ABA |
| Os.7929.4.S1_x_at | LOC_Os02g12480 | expressed protein                                                                     | 1.11 | down | 1.04 | down | 4.92  | down | 1.59 | down | 1.64 | down | 1.98 | down | ABA |
| Os.7932.1.S1_at   | LOC_Os09g26880 | aldehyde dehydrogenase, putative, expressed                                           | 1.01 | up   | 1.03 | down | 2.54  | up   | 1.09 | up   | 1.72 | up   | 1.11 | up   | ABA |
| Os.7938.1.S1_at   | LOC_Os04g59190 | peroxidase precursor, putative, expressed                                             | 1.09 | up   | 1.38 | up   | 6.53  | down | 1.32 | up   | 4.93 | down | 3.54 | up   | 3   |
| Os.7972.1.S1_at   | LOC_Os02g39790 | CPuORF9 - conserved peptide uORF-containing transcript, expressed                     | 1.11 | up   | 1.12 | down | 2.49  | up   | 1.02 | up   | 1.14 | up   | 1.04 | up   | ABA |
| Os.7979.1.S1_at   | LOC_Os03g63480 | ankyrin repeat domain containing protein, expressed                                   | 1.10 | down | 1.15 | up   | 2.84  | down | 1.32 | down | 1.49 | down | 1.37 | down | ABA |
| Os.7985.1.S1_at   | LOC_Os03g18070 | omega-3 fatty acid desaturase, chloroplast precursor, putative, expressed             | 1.09 | down | 1.10 | up   | 11.17 | down | 1.25 | down | 1.89 | down | 1.14 | up   | ABA |
| Os.7994.1.S1_at   | LOC_Os04g45490 | elongation factor, putative, expressed                                                | 1.42 | up   | 1.10 | up   | 3.57  | down | 1.25 | down | 1.72 | down | 1.17 | down | ABA |
| Os.7995.1.S1_x_at | LOC_Os01g12690 | plant-specific domain TIGR01568 family protein, expressed                             | 1.03 | down | 1.41 | up   | 10.63 | up   | 1.20 | up   | 1.03 | up   | 1.21 | down | ABA |
| Os.7999.1.S1_at   | LOC_Os07g43380 | zinc finger, C3HC4 type domain containing protein, expressed                          | 1.08 | up   | 1.16 | down | 2.07  | up   | 1.07 | up   | 1.35 | up   | 1.26 | up   | ABA |
| Os.8007.1.S1_at   | LOC_Os12g17910 | T-complex protein, putative, expressed                                                | 1.02 | up   | 1.06 | down | 3.25  | down | 1.15 | down | 1.65 | down | 1.16 | down | ABA |
| Os.8014.1.S1_at   | LOC_Os10g10180 | methyltransferase domain containing protein, putative, expressed                      | 1.03 | up   | 1.06 | up   | 3.44  | down | 1.19 | down | 1.96 | down | 1.45 | down | ABA |
| Os.8014.2.S1_x_at | LOC_Os10g10180 | methyltransferase domain containing protein, putative, expressed                      | 1.21 | up   | 1.06 | up   | 3.30  | down | 1.07 | down | 1.72 | down | 1.21 | down | ABA |
| Os.8017.1.S1_at   | LOC_Os03g55850 | cold acclimation protein WCOR413, putative, expressed                                 | 1.04 | up   | 1.08 | down | 4.31  | up   | 1.22 | down | 1.14 | up   | 1.21 | up   | ABA |
| Os.802.1.S1_at    | LOC_Os01g01430 | No apical meristem protein, putative, expressed                                       | 1.17 | up   | 1.01 | down | 4.38  | up   | 1.03 | down | 1.60 | down | 1.19 | up   | ABA |
| Os.8024.1.S1_at   | LOC_Os07g30170 | nitrilase, putative, expressed                                                        | 1.10 | up   | 1.04 | down | 3.51  | up   | 1.16 | up   | 1.60 | up   | 1.42 | up   | ABA |
| Os.8032.1.S1_at   | LOC_Os04g57440 | oryzain beta chain precursor, putative, expressed                                     | 1.09 | up   | 1.06 | up   | 3.21  | up   | 1.34 | up   | 1.14 | up   | 1.46 | up   | ABA |
| Os.8039.1.S1_at   | LOC_Os03g46640 | deoxyuridine 5-triphosphate nucleotidohydrolase, putative, expressed                  | 2.18 | up   | 1.08 | down | 5.35  | down | 1.25 | down | 2.02 | down | 1.54 | down | 3   |

|                   |                |                                                                                    |      |      |       |      |       |      |      |      |      |      |      |      |     |
|-------------------|----------------|------------------------------------------------------------------------------------|------|------|-------|------|-------|------|------|------|------|------|------|------|-----|
| Os.8043.1.S1_at   | LOC_Os03g51010 | hydrolase, alpha/beta fold family domain containing protein, expressed             | 1.46 | up   | 1.04  | up   | 5.39  | up   | 1.22 | up   | 1.62 | up   | 1.49 | up   | ABA |
| Os.8051.1.S1_at   | LOC_Os11g47820 | glucan endo-1,3-beta-glucosidase precursor, putative, expressed                    | 1.39 | down | 1.22  | down | 2.52  | up   | 1.09 | up   | 1.21 | up   | 1.01 | up   | ABA |
| Os.8052.1.S1_at   | LOC_Os03g51390 | expressed protein                                                                  | 1.37 | up   | 1.79  | up   | 2.16  | up   | 1.68 | up   | 2.56 | up   | 1.29 | down | 2   |
| Os.8081.1.A1_at   | LOC_Os07g36390 | PPR repeat containing protein, expressed                                           | 1.14 | down | 1.22  | up   | 2.99  | down | 1.15 | down | 1.38 | down | 1.21 | down | ABA |
| Os.8084.1.S1_x_at | AK065049       | expressed protein                                                                  | 1.04 | down | 1.02  | up   | 2.01  | up   | 1.09 | down | 1.20 | down | 1.34 | down | ABA |
| Os.8095.1.S1_at   | LOC_Os03g22050 | CAMK_KIN1/SNF1/Nim1_like.16 - CAMK includes calcium/calmodulin dependent protein   | 1.10 | up   | 1.32  | up   | 3.97  | down | 1.20 | down | 1.61 | down | 1.79 | down | ABA |
| Os.8095.1.S2_at   | LOC_Os03g22050 | CAMK_KIN1/SNF1/Nim1_like.16 - CAMK includes calcium/calmodulin dependent protein   | 1.16 | up   | 1.37  | up   | 4.70  | down | 1.26 | down | 1.73 | down | 1.66 | down | ABA |
| Os.8095.1.S3_at   | LOC_Os03g22050 | CAMK_KIN1/SNF1/Nim1_like.16 - CAMK includes calcium/calmodulin dependent protein   | 1.14 | down | 1.18  | up   | 4.31  | down | 1.33 | down | 1.68 | down | 1.53 | down | ABA |
| Os.8095.1.S4_at   | LOC_Os03g22050 | CAMK_KIN1/SNF1/Nim1_like.16 - CAMK includes calcium/calmodulin dependent protein   | 1.17 | down | 1.36  | up   | 5.56  | down | 1.57 | down | 2.47 | down | 2.51 | down | 3   |
| Os.8097.1.A1_at   | LOC_Os02g28040 | lipase, putative, expressed                                                        | 1.04 | down | 1.07  | down | 4.05  | up   | 1.17 | up   | 1.24 | up   | 1.12 | up   | ABA |
| Os.8098.1.S1_at   | LOC_Os11g18570 | cytochrome P450, putative, expressed                                               | 2.61 | up   | 1.10  | down | 9.73  | up   | 3.10 | down | 2.13 | up   | 2.20 | up   | 5   |
| Os.8107.1.S1_at   | LOC_Os07g49330 | phospholipase C, putative, expressed                                               | 1.01 | up   | 1.22  | down | 2.06  | up   | 1.15 | down | 1.14 | up   | 1.13 | down | ABA |
| Os.8108.1.S1_at   | LOC_Os03g11260 | RING zinc finger protein-like, putative, expressed                                 | 1.03 | down | 1.16  | down | 2.27  | up   | 1.08 | down | 1.19 | up   | 1.15 | down | ABA |
| Os.8110.1.S1_at   | LOC_Os03g14400 | cytochrome P450, putative, expressed                                               | 1.19 | up   | 1.16  | down | 2.46  | up   | 1.16 | up   | 1.01 | up   | 1.24 | up   | ABA |
| Os.8113.1.S1_at   | LOC_Os01g08470 | retrotransposon protein, putative, unclassified, expressed                         | 1.09 | up   | 1.41  | down | 3.10  | up   | 1.24 | up   | 1.32 | up   | 1.05 | down | ABA |
| Os.8114.1.A1_x_at | LOC_Os03g51240 | glycosyl hydrolases family 17, putative, expressed                                 | 1.39 | up   | 1.07  | down | 2.68  | up   | 1.34 | down | 1.08 | up   | 1.06 | down | ABA |
| Os.8115.1.S1_at   | LOC_Os01g68540 | rho GDP-dissociation inhibitor 1, putative, expressed                              | 1.25 | up   | 1.13  | up   | 3.04  | up   | 1.00 | up   | 1.00 | up   | 1.03 | down | ABA |
| Os.8117.1.S1_at   | LOC_Os04g36062 | expressed protein                                                                  | 1.13 | up   | 18.77 | up   | 3.28  | down | 1.60 | down | 3.51 | down | 2.98 | down | 4   |
| Os.8139.1.S1_at   | LOC_Os09g29490 | peroxidase precursor, putative, expressed                                          | 1.84 | up   | 1.26  | up   | 7.74  | down | 1.75 | up   | 1.73 | down | 2.72 | down | 2   |
| Os.8141.1.S1_at   | LOC_Os02g05710 | expressed protein                                                                  | 1.11 | up   | 1.19  | down | 3.46  | up   | 1.08 | down | 1.01 | down | 1.24 | up   | ABA |
| Os.8147.1.S1_a_at | LOC_Os04g48750 | 3-oxo-5-alpha-steroid 4-dehydrogenase, putative, expressed                         | 1.16 | down | 1.10  | down | 3.71  | up   | 1.04 | up   | 1.31 | up   | 1.04 | up   | ABA |
| Os.8149.1.S1_at   | LOC_Os02g46030 | MYB family transcription factor, putative, expressed                               | 1.88 | down | 2.66  | down | 26.22 | up   | 1.03 | down | 1.05 | up   | 1.06 | down | 2   |
| Os.8150.1.S1_a_at | LOC_Os05g42350 | ferredoxin-nitrite reductase, putative, expressed                                  | 1.84 | up   | 1.47  | up   | 2.02  | down | 1.00 | up   | 2.26 | up   | 1.18 | up   | 2   |
| Os.8150.1.S1_at   | LOC_Os05g42350 | ferredoxin-nitrite reductase, putative, expressed                                  | 1.95 | up   | 1.52  | up   | 1.97  | down | 1.07 | down | 2.01 | up   | 1.06 | up   | SA  |
| Os.8150.2.S1_x_at | LOC_Os05g42350 | ferredoxin-nitrite reductase, putative, expressed                                  | 2.30 | up   | 1.64  | up   | 1.93  | down | 1.04 | down | 2.20 | up   | 1.20 | up   | 2   |
| Os.8195.1.S1_at   | AK241299       | Oryza sativa Japonica Group cDNA, clone: J065139L09, full insert sequence.         | 1.51 | up   | 1.15  | down | 61.59 | up   | 1.08 | down | 7.00 | up   | 1.19 | up   | 2   |
| Os.820.1.S1_s_at  | LOC_Os01g19020 | peroxidase precursor, putative, expressed                                          | 1.52 | down | 1.26  | down | 2.55  | down | 1.08 | down | 1.44 | down | 1.08 | down | ABA |
| Os.8201.1.S1_x_at | LOC_Os12g01380 | proteins of unknown function domain containing protein, expressed                  | 1.14 | up   | 1.15  | down | 1.72  | down | 1.08 | up   | 1.06 | down | 2.01 | up   | JA  |
| Os.8208.1.S1_at   | LOC_Os03g57960 | cupin domain containing protein, expressed                                         | 1.02 | down | 1.01  | down | 22.78 | up   | 1.01 | up   | 1.01 | up   | 1.03 | up   | ABA |
| Os.8221.1.S1_a_at | LOC_Os04g35100 | phospholipase C, putative, expressed                                               | 1.58 | up   | 1.28  | down | 18.96 | up   | 1.36 | down | 1.15 | down | 1.11 | down | ABA |
| Os.8240.1.S1_at   | LOC_Os11g26850 | erythronate-4-phosphate dehydrogenase, putative, expressed                         | 1.06 | up   | 1.05  | up   | 2.42  | down | 1.04 | up   | 1.22 | down | 1.39 | up   | ABA |
| Os.8244.1.S1_at   | LOC_Os04g43490 | CK1_CaseinKinase_1.7 - CK1 includes the casein kinase 1 kinases, expressed         | 1.40 | up   | 1.02  | up   | 2.38  | down | 1.01 | down | 1.52 | down | 1.63 | up   | ABA |
| Os.8250.1.S1_at   | AK107488       | expressed protein                                                                  | 1.08 | up   | 1.13  | down | 2.53  | down | 1.34 | up   | 1.02 | up   | 1.00 | down | ABA |
| Os.8252.1.S1_s_at | LOC_Os01g34690 | expressed protein                                                                  | 1.22 | up   | 1.08  | down | 2.23  | down | 1.10 | down | 1.05 | down | 1.03 | down | ABA |
| Os.8259.1.S1_at   | LOC_Os05g31760 | annexin, putative, expressed                                                       | 1.03 | down | 1.18  | down | 2.04  | down | 1.66 | down | 1.18 | down | 2.67 | up   | 2   |
| Os.8260.1.S1_at   | LOC_Os10g28680 | DUF581 domain containing protein, expressed                                        | 1.04 | down | 2.00  | down | 6.05  | up   | 1.68 | down | 1.33 | up   | 1.76 | down | 2   |
| Os.8266.1.A1_at   | LOC_Os03g55800 | cytochrome P450, putative, expressed                                               | 1.08 | up   | 1.06  | down | 2.16  | down | 1.13 | up   | 1.17 | down | 5.78 | up   | 2   |
| Os.8279.1.S1_at   | LOC_Os05g42020 | UDP-glucuronosyl and UDP-glucosyl transferase domain containing protein, expressed | 1.12 | up   | 1.09  | down | 2.32  | up   | 1.18 | up   | 1.06 | down | 1.12 | down | ABA |
| Os.8347.1.S1_at   | LOC_Os09g35680 | OsFBX339 - F-box domain containing protein, expressed                              | 1.13 | down | 1.22  | down | 2.04  | up   | 1.02 | down | 1.11 | up   | 1.06 | down | ABA |
| Os.8360.1.S1_at   | LOC_Os01g24550 | fruit bromelain precursor, putative, expressed                                     | 3.12 | down | 1.41  | up   | 21.55 | down | 1.19 | up   | 6.02 | down | 1.99 | down | 4   |
| Os.8362.1.S1_at   | LOC_Os10g03690 | OsFBX346 - F-box domain containing protein, expressed                              | 1.12 | down | 1.23  | down | 2.09  | up   | 1.06 | down | 1.15 | up   | 1.11 | down | ABA |
| Os.8374.1.S1_at   | LOC_Os04g43910 | auxin response factor, putative, expressed                                         | 3.73 | up   | 1.53  | down | 1.84  | down | 1.69 | down | 1.19 | up   | 1.18 | down | IAA |
| Os.8379.1.S1_at   | LOC_Os07g29190 | expressed protein                                                                  | 1.31 | down | 1.04  | down | 2.82  | down | 1.08 | down | 1.56 | down | 1.55 | down | ABA |
| Os.8427.1.S1_s_at | AK1122041      | DC1 domain-containing protein                                                      | 1.96 | up   | 1.09  | up   | 29.79 | up   | 1.31 | up   | 1.36 | up   | 1.22 | up   | ABA |
| Os.8428.1.S1_at   | LOC_Os05g30530 | 40S ribosomal protein S4, putative, expressed                                      | 1.01 | down | 1.17  | up   | 2.18  | down | 1.10 | up   | 1.21 | down | 1.08 | down | ABA |
| Os.8446.1.S1_at   | LOC_Os09g31230 | expressed protein                                                                  | 1.04 | up   | 1.05  | down | 2.12  | down | 1.27 | down | 1.15 | up   | 1.02 | down | ABA |
| Os.8458.1.S1_s_at | LOC_Os04g05050 | pectate lyase precursor, putative, expressed                                       | 1.15 | down | 1.14  | down | 3.15  | down | 1.18 | down | 1.16 | down | 1.28 | up   | ABA |
| Os.8475.2.S1_at   | LOC_Os08g38170 | methyladenine glycosylase, putative, expressed                                     | 1.13 | up   | 1.30  | up   | 4.80  | down | 1.18 | down | 1.67 | down | 1.15 | down | ABA |
| Os.8483.1.S1_at   | LOC_Os04g39440 | ras-related protein, putative, expressed                                           | 1.20 | up   | 1.01  | up   | 2.99  | up   | 1.03 | down | 1.59 | up   | 1.14 | down | ABA |
| Os.8487.1.S1_at   | LOC_Os05g18470 | CRAL/TRIO domain containing protein, expressed                                     | 1.04 | up   | 1.01  | down | 5.61  | up   | 1.94 | down | 1.48 | up   | 1.38 | up   | ABA |
| Os.8493.1.A1_at   | LOC_Os06g43430 | cytochrome P450, putative, expressed                                               | 1.41 | down | 1.45  | up   | 4.69  | down | 1.10 | up   | 1.57 | down | 1.59 | down | ABA |
| Os.8503.1.S1_at   | LOC_Os06g39110 | expressed protein                                                                  | 1.36 | down | 1.05  | up   | 4.24  | down | 1.25 | down | 1.69 | down | 1.09 | down | ABA |
| Os.8508.1.S1_at   | LOC_Os10g38880 | DUF623 domain containing protein, expressed                                        | 2.36 | down | 2.38  | down | 11.07 | down | 1.04 | down | 1.34 | down | 1.48 | down | 3   |
| Os.8509.1.S1_at   | LOC_Os05g50260 | polygalacturonase, putative, expressed                                             | 1.71 | down | 1.24  | up   | 2.55  | up   | 1.71 | up   | 1.83 | down | 1.67 | down | ABA |
| Os.8517.1.S1_at   | LOC_Os03g62010 | harpin-induced protein 1 domain containing protein, expressed                      | 1.08 | down | 1.15  | up   | 3.42  | down | 1.76 | up   | 1.10 | up   | 1.59 | down | ABA |

|                   |                |                                                                                     |      |      |      |      |        |      |      |      |       |      |      |      |     |
|-------------------|----------------|-------------------------------------------------------------------------------------|------|------|------|------|--------|------|------|------|-------|------|------|------|-----|
| Os.8519.1.S1_a_at | LOC_Os05g51830 | ZOS5-12 - C2H2 zinc finger protein, expressed                                       | 1.06 | down | 1.01 | up   | 2.26   | down | 1.12 | up   | 1.39  | down | 1.05 | down | ABA |
| Os.8522.1.S1_at   | LOC_Os06g45980 | toprim domain-containing protein, putative, expressed                               | 1.21 | up   | 1.21 | up   | 4.38   | down | 1.01 | down | 1.76  | down | 1.66 | down | ABA |
| Os.8527.2.S1_x_at | LOC_Os10g20240 | syntaxin 6, N-terminal domain containing protein, expressed                         | 1.10 | up   | 1.11 | down | 2.51   | up   | 1.03 | up   | 1.33  | up   | 1.32 | up   | ABA |
| Os.8549.1.S1_at   | LOC_Os03g50130 | microsomal glutathione S-transferase 3, putative, expressed                         | 1.15 | up   | 1.42 | up   | 1.67   | down | 1.19 | up   | 2.38  | up   | 1.31 | down | SA  |
| Os.855.1.S1_at    | LOC_Os01g03730 | nuclease PA3, putative, expressed                                                   | 1.25 | up   | 1.46 | down | 7.16   | up   | 1.01 | down | 1.51  | up   | 1.40 | up   | ABA |
| Os.8551.1.S1_s_at | LOC_Os02g04520 | AGG2, putative, expressed                                                           | 1.03 | down | 1.09 | down | 2.02   | down | 1.08 | down | 1.23  | down | 1.09 | down | ABA |
| Os.8554.1.S1_at   | LOC_Os01g74190 | radical SAM enzyme, putative, expressed                                             | 1.21 | up   | 1.09 | up   | 2.69   | down | 1.33 | down | 1.62  | down | 1.34 | down | ABA |
| Os.8554.2.S1_x_at | LOC_Os01g74190 | radical SAM enzyme, putative, expressed                                             | 1.36 | up   | 1.05 | up   | 2.80   | down | 1.19 | down | 1.51  | down | 1.12 | down | ABA |
| Os.8559.1.S1_at   | AK107748       | Oryza sativa (indica cultivar-group) cDNA clone:OSIGCEA020C20, full insert sequence | 1.35 | up   | 1.06 | up   | 165.33 | up   | 1.42 | down | 4.05  | up   | 1.05 | down | 2   |
| Os.8575.1.S1_at   | LOC_Os12g08200 | expressed protein                                                                   | 1.08 | down | 1.02 | down | 2.81   | down | 1.72 | down | 1.68  | down | 1.99 | down | ABA |
| Os.8578.1.S1_at   | LOC_Os06g01350 | transferase family protein, putative, expressed                                     | 1.53 | up   | 1.17 | up   | 1.25   | up   | 1.90 | up   | 4.27  | up   | 1.80 | up   | SA  |
| Os.8593.1.S1_at   | LOC_Os04g53930 | organic cation transporter protein, putative, expressed                             | 1.47 | down | 1.37 | down | 2.63   | up   | 1.31 | up   | 2.62  | up   | 6.32 | up   | 3   |
| Os.8600.1.S1_at   | LOC_Os04g37480 | oxidoreductase, aldo/keto reductase family protein, putative, expressed             | 1.18 | up   | 1.20 | down | 2.38   | down | 1.06 | down | 1.08  | down | 1.26 | down | ABA |
| Os.8615.1.S1_at   | LOC_Os08g38400 | oligopeptide transporter, putative, expressed                                       | 1.43 | down | 1.35 | down | 4.24   | down | 1.04 | up   | 1.27  | down | 1.09 | down | ABA |
| Os.8621.1.S1_a_at | LOC_Os08g37300 | expressed protein                                                                   | 1.15 | up   | 1.01 | down | 2.70   | up   | 1.15 | down | 1.10  | down | 1.25 | down | ABA |
| Os.8622.1.S1_at   | LOC_Os07g08460 | OslAA24 - Auxin-responsive Aux/IAA gene family member, expressed                    | 3.52 | up   | 1.21 | down | 2.28   | up   | 1.18 | down | 1.15  | up   | 1.01 | up   | 2   |
| Os.8633.1.S1_a_at | LOC_Os04g53760 | kinesin motor domain containing protein, putative, expressed                        | 1.18 | down | 1.39 | down | 2.08   | down | 1.53 | down | 1.41  | down | 1.07 | up   | ABA |
| Os.8638.1.S1_at   | LOC_Os10g05950 | POE11 - Pollen Ole e l allergen and extensin family protein precursor, expressed    | 1.09 | down | 1.03 | down | 3.97   | down | 1.17 | up   | 1.07  | up   | 1.12 | down | ABA |
| Os.8638.1.S1_s_at | LOC_Os10g05950 | POE11 - Pollen Ole e l allergen and extensin family protein precursor, expressed    | 1.01 | up   | 1.06 | down | 4.90   | up   | 1.26 | up   | 1.03  | down | 1.04 | down | ABA |
| Os.8639.1.S1_at   | LOC_Os02g24700 | OsSAUR8 - Auxin-responsive SAUR gene family member, expressed                       | 1.15 | up   | 1.09 | down | 7.87   | down | 1.28 | up   | 1.05  | down | 1.50 | down | ABA |
| Os.8648.1.S1_s_at | LOC_Os08g37250 | patatin, putative, expressed                                                        | 1.00 | down | 1.24 | down | 1.62   | up   | 1.70 | up   | 1.81  | up   | 3.13 | up   | JA  |
| Os.8649.1.S1_at   | LOC_Os11g43590 | kelch repeat protein, putative, expressed                                           | 1.01 | down | 1.11 | down | 2.76   | down | 1.45 | down | 1.03  | up   | 1.21 | down | ABA |
| Os.8653.1.S1_at   | LOC_Os02g32610 | protein kinase domain containing protein, expressed                                 | 1.27 | up   | 1.04 | up   | 1.12   | up   | 2.80 | up   | 1.52  | up   | 1.09 | up   | ACC |
| Os.8666.1.S1_at   | LOC_Os02g57110 | GDSL-like lipase/acylhydrolase, putative, expressed                                 | 1.11 | up   | 1.11 | down | 3.72   | down | 1.12 | down | 1.15  | down | 1.01 | down | ABA |
| Os.8668.1.S1_at   | LOC_Os12g36640 | universal stress protein domain containing protein, putative, expressed             | 1.06 | down | 1.08 | down | 2.74   | up   | 1.47 | up   | 1.46  | up   | 1.01 | down | ABA |
| Os.8668.1.S1_x_at | LOC_Os12g36640 | universal stress protein domain containing protein, putative, expressed             | 1.09 | up   | 1.05 | down | 2.33   | up   | 1.40 | up   | 1.37  | up   | 1.07 | down | ABA |
| Os.8681.1.S1_at   | CT829869       | Oryza sativa (indica cultivar-group) cDNA clone:OSIGCFA016C17, full insert sequence | 1.51 | up   | 1.28 | down | 2.66   | up   | 1.10 | up   | 1.14  | down | 1.24 | down | ABA |
| Os.8682.1.S1_a_at | LOC_Os10g08780 | expressed protein                                                                   | 1.49 | up   | 1.82 | down | 4.44   | down | 1.19 | down | 1.94  | down | 2.14 | down | 2   |
| Os.8682.1.S1_at   | LOC_Os10g08780 | expressed protein                                                                   | 1.12 | up   | 1.79 | down | 3.35   | down | 1.01 | up   | 1.47  | down | 1.77 | down | ABA |
| Os.8682.2.S1_x_at | LOC_Os10g08780 | expressed protein                                                                   | 1.32 | up   | 1.62 | down | 3.91   | down | 1.18 | down | 1.82  | down | 1.98 | down | ABA |
| Os.8684.1.S1_a_at | LOC_Os02g09490 | dehydrogenase, putative, expressed                                                  | 1.19 | down | 1.21 | up   | 2.21   | down | 1.16 | down | 1.96  | down | 1.30 | down | ABA |
| Os.8707.2.A1_at   | LOC_Os03g62730 | transposon protein, putative, unclassified, expressed                               | 1.11 | down | 1.14 | down | 3.20   | down | 1.17 | up   | 1.01  | down | 1.09 | up   | ABA |
| Os.8707.3.S1_x_at | LOC_Os03g62730 | transposon protein, putative, unclassified, expressed                               | 1.28 | down | 1.19 | down | 3.11   | down | 1.21 | up   | 1.06  | up   | 1.05 | up   | ABA |
| Os.872.2.S1_at    | LOC_Os01g14580 | dehydrogenase, putative, expressed                                                  | 1.03 | down | 1.49 | down | 3.41   | down | 1.29 | down | 1.15  | up   | 4.04 | up   | 2   |
| Os.8732.1.S1_at   | LOC_Os02g53340 | cyclic nucleotide-gated ion channel, putative, expressed                            | 1.46 | up   | 1.01 | down | 2.04   | up   | 1.06 | down | 1.14  | up   | 1.14 | down | ABA |
| Os.8734.1.S1_a_at | LOC_Os09g35810 | NC domain-containing protein, putative, expressed                                   | 1.29 | down | 1.08 | down | 2.23   | down | 1.04 | down | 1.22  | down | 1.04 | down | ABA |
| Os.8742.1.S1_at   | LOC_Os03g19250 | AMP-binding enzyme, putative, expressed                                             | 1.41 | up   | 1.10 | down | 3.26   | up   | 1.62 | up   | 2.75  | up   | 2.09 | up   | 3   |
| Os.8746.1.S1_at   | LOC_Os05g02670 | kinesin motor domain containing protein, putative, expressed                        | 1.10 | down | 1.07 | down | 2.51   | down | 1.03 | up   | 1.20  | down | 1.04 | up   | ABA |
| Os.8749.1.S1_at   | LOC_Os07g39300 | expressed protein                                                                   | 1.03 | down | 1.02 | down | 3.63   | up   | 1.24 | down | 1.02  | up   | 1.18 | down | ABA |
| Os.8760.1.S1_a_at | LOC_Os09g36600 | nodulin, putative, expressed                                                        | 1.39 | down | 1.08 | down | 6.07   | down | 1.18 | up   | 1.16  | down | 1.16 | down | ABA |
| Os.8760.2.S1_a_at | LOC_Os09g36600 | nodulin, putative, expressed                                                        | 1.06 | down | 1.13 | up   | 5.37   | down | 1.02 | up   | 1.17  | down | 1.02 | down | ABA |
| Os.8762.1.S1_at   | LOC_Os12g25630 | sulfite oxidase, putative, expressed                                                | 2.34 | up   | 1.31 | down | 1.76   | up   | 1.34 | up   | 11.16 | up   | 4.76 | up   | 3   |
| Os.8765.1.S1_a_at | LOC_Os01g47690 | metallo-beta-lactamase family protein, putative, expressed                          | 1.66 | up   | 1.12 | down | 3.53   | up   | 1.39 | up   | 2.86  | up   | 2.63 | up   | 3   |
| Os.8768.1.S1_a_at | LOC_Os02g48630 | expressed protein                                                                   | 1.10 | down | 1.15 | down | 4.98   | up   | 1.32 | up   | 1.86  | up   | 1.32 | up   | ABA |
| Os.8773.2.S1_a_at | LOC_Os06g09679 | chaperonin, putative, expressed                                                     | 1.23 | up   | 1.06 | up   | 2.16   | down | 1.15 | down | 1.32  | down | 1.22 | down | ABA |
| Os.8776.1.S1_at   | LOC_Os03g64219 | OTU-like cysteine protease family protein, putative, expressed                      | 1.08 | up   | 1.02 | up   | 2.99   | up   | 1.32 | up   | 1.81  | up   | 1.36 | up   | ABA |
| Os.8778.1.S1_a_at | LOC_Os06g11290 | 12-oxophytodienoate reductase, putative, expressed                                  | 4.53 | up   | 1.38 | down | 1.25   | up   | 1.10 | up   | 8.10  | up   | 2.03 | up   | 3   |
| Os.8779.1.S1_at   | LOC_Os07g49270 | AMP deaminase, putative, expressed                                                  | 1.03 | up   | 1.02 | up   | 2.60   | up   | 1.07 | up   | 2.00  | up   | 1.14 | up   | 2   |
| Os.8786.1.S1_a_at | AK067371       | leucine-rich repeat transmembrane protein kinase, putative                          | 1.21 | up   | 1.09 | up   | 4.18   | down | 1.18 | up   | 1.35  | down | 1.26 | down | ABA |
| Os.8786.3.S1_x_at | LOC_Os05g40270 | expressed protein                                                                   | 1.27 | up   | 1.13 | up   | 3.86   | down | 1.14 | up   | 1.27  | down | 1.15 | down | ABA |
| Os.8786.4.S1_x_at | AK067371       | leucine-rich repeat transmembrane protein kinase, putative                          | 1.29 | up   | 1.06 | up   | 4.39   | down | 1.15 | up   | 1.47  | down | 1.17 | down | ABA |
| Os.8793.1.S1_at   | LOC_Os06g10520 | pantothenate kinase, putative, expressed                                            | 1.02 | up   | 1.18 | down | 1.35   | up   | 1.04 | up   | 2.00  | up   | 1.60 | up   | SA  |
| Os.8802.1.S1_at   | LOC_Os02g22160 | DNA binding protein, putative, expressed                                            | 1.06 | up   | 1.02 | up   | 3.47   | up   | 1.29 | up   | 1.17  | down | 1.11 | up   | ABA |
| Os.8833.1.S1_at   | LOC_Os04g48070 | homeobox and START domains containing protein, putative, expressed                  | 1.75 | up   | 1.09 | down | 9.84   | up   | 1.17 | down | 1.38  | up   | 1.06 | up   | ABA |
| Os.8840.1.S1_at   | LOC_Os02g48390 | phosphoribosyl transferase, putative, expressed                                     | 1.28 | down | 1.47 | down | 4.60   | down | 1.01 | down | 1.50  | down | 1.38 | down | ABA |

|                   |                |                                                                                       |       |      |      |      |        |      |      |      |       |      |       |      |     |
|-------------------|----------------|---------------------------------------------------------------------------------------|-------|------|------|------|--------|------|------|------|-------|------|-------|------|-----|
| Os.8851.1.S1_at   | LOC_Os08g35630 | MTD1, putative, expressed                                                             | 1.12  | down | 1.01 | down | 9.89   | up   | 1.13 | up   | 2.11  | up   | 1.03  | down | 2   |
| Os.8865.2.S1_x_at | LOC_Os01g61320 | thioredoxin, putative, expressed                                                      | 1.05  | down | 1.00 | up   | 3.40   | down | 1.13 | down | 1.68  | down | 1.44  | down | ABA |
| Os.8868.1.S1_at   | LOC_Os10g38610 | glutathione S-transferase, putative, expressed                                        | 1.01  | up   | 1.14 | down | 1.02   | down | 1.53 | down | 3.36  | up   | 1.33  | down | SA  |
| Os.8870.1.S1_s_at | LOC_Os12g12370 | outer envelope protein, putative, expressed                                           | 1.04  | up   | 1.31 | up   | 2.34   | up   | 1.22 | down | 1.06  | up   | 1.05  | down | ABA |
| Os.8895.1.S1_at   | LOC_Os03g25050 | chaperonin, putative, expressed                                                       | 1.12  | down | 1.09 | up   | 2.32   | down | 1.05 | up   | 1.17  | down | 1.08  | down | ABA |
| Os.8897.1.S1_at   | AK107786       | Oryza sativa Japonica Group cDNA clone:002-133-C12, full insert sequence.             | 1.09  | up   | 1.40 | up   | 81.39  | up   | 1.18 | down | 1.62  | up   | 1.24  | down | ABA |
| Os.8900.1.S1_a_at | LOC_Os03g06139 | ABC-2 type transporter domain containing protein, expressed                           | 1.36  | up   | 1.28 | down | 2.06   | up   | 1.35 | down | 1.02  | down | 1.07  | down | ABA |
| Os.8906.1.S1_at   | LOC_Os04g48480 | exostosin family domain containing protein, expressed                                 | 1.70  | down | 1.43 | up   | 2.50   | down | 1.11 | down | 1.11  | down | 1.16  | down | ABA |
| Os.8908.1.S1_at   | LOC_Os02g53320 | universal stress protein domain containing protein, putative, expressed               | 1.04  | up   | 1.07 | down | 4.38   | up   | 1.75 | down | 1.21  | up   | 1.93  | down | ABA |
| Os.8910.1.S1_at   | LOC_Os02g37830 | protein kinase domain containing protein, expressed                                   | 1.02  | down | 1.17 | down | 2.12   | down | 1.10 | down | 1.04  | up   | 1.44  | up   | ABA |
| Os.8928.1.S1_at   | LOC_Os05g48590 | OslAA19 - Auxin-responsive Aux/IAA gene family member, expressed                      | 2.42  | up   | 1.05 | up   | 1.42   | up   | 1.06 | down | 1.60  | up   | 1.09  | up   | IAA |
| Os.8936.1.S1_at   | LOC_Os08g07390 | m1a1, putative, expressed                                                             | 1.11  | down | 1.06 | down | 3.21   | up   | 1.03 | down | 1.29  | up   | 1.01  | up   | ABA |
| Os.8941.1.S1_at   | LOC_Os06g47840 | ZOS6-08 - C2H2 zinc finger protein, expressed                                         | 1.48  | up   | 1.16 | up   | 1.44   | up   | 1.24 | up   | 2.40  | up   | 1.05  | up   | SA  |
| Os.8942.1.S1_at   | LOC_Os02g53700 | DENN domain containing protein, expressed                                             | 1.18  | up   | 1.13 | up   | 8.76   | up   | 1.03 | up   | 1.35  | up   | 1.10  | down | ABA |
| Os.8942.2.S1_at   | LOC_Os02g53700 | DENN domain containing protein, expressed                                             | 1.03  | down | 1.11 | down | 4.42   | up   | 1.07 | down | 1.15  | up   | 1.36  | down | ABA |
| Os.8945.1.S1_at   | LOC_Os06g39370 | OsFBK16 - F-box domain and kelch repeat containing protein, expressed                 | 1.07  | down | 1.36 | up   | 2.44   | up   | 1.46 | down | 1.33  | down | 2.78  | down | 2   |
| Os.8947.1.S1_at   | LOC_Os03g05910 | expressed protein                                                                     | 16.34 | up   | 1.11 | down | 58.28  | up   | 1.97 | up   | 70.08 | up   | 27.29 | up   | 4   |
| Os.8957.1.S1_a_at | LOC_Os01g63060 | phosphatidic acid phosphatase-related, putative, expressed                            | 1.03  | down | 1.39 | down | 2.23   | up   | 1.06 | up   | 1.44  | up   | 1.11  | up   | ABA |
| Os.8965.1.S1_at   | LOC_Os01g40280 | integral membrane protein, putative, expressed                                        | 1.17  | up   | 1.02 | up   | 6.27   | up   | 1.15 | down | 3.30  | up   | 1.14  | down | 2   |
| Os.8971.1.S1_at   | LOC_Os05g44340 | heat shock protein 101, putative, expressed                                           | 1.16  | down | 1.14 | down | 11.37  | up   | 1.26 | down | 4.97  | up   | 1.11  | down | 2   |
| Os.8982.1.S1_at   | LOC_Os01g58194 | protein disulfide isomerase, putative, expressed                                      | 1.01  | down | 1.06 | up   | 3.95   | up   | 1.02 | up   | 1.65  | up   | 1.01  | up   | ABA |
| Os.8984.1.S1_at   | LOC_Os02g13660 | meiosis 5, putative, expressed                                                        | 1.09  | up   | 1.15 | up   | 2.05   | down | 1.70 | up   | 1.15  | up   | 1.30  | up   | ABA |
| Os.9002.1.S1_at   | AK062691       | Oryza sativa Japonica Group cDNA clone:001-106-A03, full insert sequence.             | 2.23  | up   | 1.11 | up   | 1.29   | up   | 1.10 | down | 1.07  | up   | 1.23  | down | IAA |
| Os.9003.1.S1_at   | LOC_Os11g43620 | LSM domain containing protein, expressed                                              | 1.04  | down | 1.16 | up   | 2.26   | down | 1.12 | down | 1.36  | down | 1.00  | up   | ABA |
| Os.9016.1.S1_x_at | AK287455       | Oryza sativa Japonica Group cDNA, clone: J043019E16, full insert sequence.            | 1.08  | down | 1.13 | down | 2.02   | up   | 1.33 | up   | 10.45 | up   | 1.52  | up   | 2   |
| Os.9017.1.S1_x_at | LOC_Os07g23570 | cytochrome P450 72A1, putative, expressed                                             | 27.16 | up   | 8.66 | up   | 3.18   | up   | 1.65 | down | 13.58 | up   | 2.31  | up   | 5   |
| Os.9022.1.S1_at   | LOC_Os09g15670 | protein phosphatase 2C, putative, expressed                                           | 2.33  | up   | 1.08 | down | 123.44 | up   | 2.14 | down | 2.34  | up   | 1.06  | up   | 4   |
| Os.9039.1.S1_at   | AK066796       | formamidase, putative / formamide amidohydrolase, putative                            | 1.62  | up   | 1.19 | up   | 2.73   | down | 1.38 | down | 1.44  | down | 1.24  | down | ABA |
| Os.9043.1.S1_at   | LOC_Os06g03720 | ribonucleoside-diphosphate reductase small chain, putative, expressed                 | 1.42  | down | 1.02 | down | 6.22   | down | 1.13 | down | 1.95  | down | 1.91  | down | ABA |
| Os.9065.1.S1_at   | LOC_Os04g35130 | expressed protein                                                                     | 1.19  | up   | 1.36 | up   | 2.67   | up   | 1.69 | up   | 2.05  | up   | 1.18  | up   | 2   |
| Os.9067.1.S1_at   | LOC_Os07g44140 | cytochrome P450 72A1, putative, expressed                                             | 3.42  | up   | 1.08 | up   | 2.32   | up   | 1.31 | up   | 9.45  | up   | 2.25  | up   | 4   |
| Os.9069.1.S1_at   | LOC_Os01g08320 | OslAA1 - Auxin-responsive Aux/IAA gene family member, expressed                       | 3.67  | up   | 1.01 | up   | 1.88   | down | 1.11 | down | 1.09  | up   | 1.08  | down | IAA |
| Os.9072.1.S1_at   | LOC_Os11g30360 | expressed protein                                                                     | 1.55  | down | 1.31 | down | 2.23   | down | 1.01 | down | 1.44  | up   | 2.14  | up   | 2   |
| Os.9074.1.S1_s_at | LOC_Os03g02960 | nascent polypeptide-associated complex subunit alpha, putative, expressed             | 1.10  | up   | 1.07 | up   | 2.83   | down | 1.11 | down | 1.43  | down | 1.09  | down | ABA |
| Os.9080.1.S1_at   | LOC_Os03g08550 | STRUBBELIG-RECEPTOR FAMILY 6 precursor, putative, expressed                           | 1.09  | up   | 1.09 | down | 2.54   | up   | 1.37 | down | 1.14  | up   | 1.42  | down | ABA |
| Os.9101.1.S1_at   | LOC_Os10g38780 | glutathione S-transferase, putative, expressed                                        | 1.16  | up   | 1.82 | up   | 3.25   | down | 1.39 | up   | 1.20  | down | 1.47  | down | ABA |
| Os.9105.1.S1_at   | LOC_Os09g33680 | Os9bglu31 - beta-glucosidase, dhurrinase, similar to G. max hydroxyisourate hydrolase | 1.58  | up   | 1.14 | down | 4.03   | up   | 1.26 | down | 6.36  | up   | 2.32  | up   | 3   |
| Os.9108.1.S1_a_at | LOC_Os10g30156 | starch synthase, putative, expressed                                                  | 1.10  | up   | 1.31 | down | 3.43   | up   | 1.14 | down | 1.09  | up   | 1.00  | up   | ABA |
| Os.9116.1.S1_at   | LOC_Os01g28680 | WD domain, G-beta repeat domain containing protein, expressed                         | 3.24  | up   | 1.18 | down | 1.15   | down | 1.13 | down | 1.97  | up   | 1.20  | up   | IAA |
| Os.9121.1.S1_at   | LOC_Os05g29010 | POLA4 - Putative DNA polymerase alpha complex subunit, expressed                      | 1.38  | down | 1.08 | down | 6.53   | down | 1.15 | down | 2.11  | down | 1.82  | down | 2   |
| Os.9159.2.S1_x_at | LOC_Os06g02530 | expressed protein                                                                     | 2.03  | down | 1.24 | down | 11.33  | down | 1.09 | down | 1.90  | down | 2.10  | down | 3   |
| Os.9169.1.S1_x_at | AK058739       | subtilisin/chymotrypsin inhibitor                                                     | 1.21  | down | 1.07 | up   | 1.13   | down | 1.34 | down | 1.03  | up   | 6.16  | up   | JA  |
| Os.9174.1.S1_at   | LOC_Os06g51480 | expressed protein                                                                     | 1.12  | up   | 1.07 | down | 2.11   | up   | 1.04 | down | 1.02  | up   | 1.10  | down | ABA |
| Os.9178.1.S1_at   | LOC_Os11g07670 | dirigent, putative, expressed                                                         | 1.38  | down | 1.04 | up   | 2.32   | down | 1.03 | down | 1.36  | down | 1.01  | down | ABA |
| Os.9199.1.S1_at   | LOC_Os06g50330 | senescence-associated protein, putative, expressed                                    | 1.14  | up   | 1.08 | down | 2.27   | up   | 1.04 | up   | 1.18  | up   | 1.30  | down | ABA |
| Os.9201.2.S1_x_at | LOC_Os02g40010 | phosphoribosyl transferase, putative, expressed                                       | 1.45  | down | 5.85 | up   | 19.27  | down | 1.25 | down | 2.74  | down | 2.28  | down | 4   |
| Os.9207.1.S1_at   | LOC_Os11g48020 | fatty acid hydroxylase, putative, expressed                                           | 1.00  | up   | 1.00 | down | 2.84   | up   | 1.13 | up   | 1.24  | down | 1.05  | down | ABA |
| Os.9217.1.S1_at   | LOC_Os05g48980 | ras-related protein, putative, expressed                                              | 1.09  | up   | 1.09 | up   | 2.02   | down | 1.07 | down | 1.45  | down | 1.07  | up   | ABA |
| Os.9230.1.S1_x_at | LOC_Os10g35370 | oxidoreductase, short chain dehydrogenase/reductase family domain containing family   | 1.11  | down | 1.03 | up   | 3.69   | down | 1.13 | down | 1.68  | down | 1.33  | down | ABA |
| Os.9292.1.S1_at   | LOC_Os11g39370 | BRASSINOSTEROID INSENSITIVE 1-associated receptor kinase 1 precursor, putative        | 1.01  | down | 1.18 | up   | 2.02   | down | 1.25 | up   | 1.03  | down | 1.30  | down | ABA |
| Os.9300.1.S1_at   | LOC_Os05g29710 | RING-H2 finger protein, putative, expressed                                           | 1.26  | down | 1.01 | down | 7.17   | down | 1.09 | up   | 2.13  | down | 1.02  | down | 2   |
| Os.9312.1.S1_at   | LOC_Os03g01270 | expansin precursor, putative, expressed                                               | 1.96  | down | 2.37 | up   | 2.31   | down | 1.34 | up   | 3.30  | down | 7.66  | down | 4   |
| Os.9332.1.S1_at   | LOC_Os06g01934 | homeobox domain containing protein, expressed                                         | 1.02  | up   | 1.02 | down | 5.07   | down | 1.42 | down | 1.52  | down | 1.01  | up   | ABA |
| Os.9333.1.A1_s_at | LOC_Os06g12410 | GDSL-like lipase/acylhydrolase, putative, expressed                                   | 1.17  | up   | 1.59 | up   | 5.10   | up   | 1.53 | down | 1.83  | up   | 1.43  | down | ABA |
| Os.9389.2.S2_a_at | LOC_Os10g38050 | HOTHEAD precursor, putative, expressed                                                | 1.26  | down | 1.04 | down | 2.01   | up   | 1.21 | up   | 1.27  | up   | 1.02  | up   | ABA |



|                   |                |                                                                                              |      |      |      |      |        |      |      |      |      |      |      |      |     |
|-------------------|----------------|----------------------------------------------------------------------------------------------|------|------|------|------|--------|------|------|------|------|------|------|------|-----|
| Os.941.1.S1_at    | LOC_Os01g52830 | DUF1264 domain containing protein, putative, expressed                                       | 1.00 | down | 1.00 | up   | 908.45 | up   | 1.01 | down | 1.01 | down | 1.03 | up   | ABA |
| Os.9416.1.S1_at   | LOC_Os02g33110 | glycosyl hydrolases, putative, expressed                                                     | 1.52 | down | 2.82 | up   | 3.34   | down | 1.03 | down | 1.43 | down | 1.25 | up   | 2   |
| Os.9420.1.S1_at   | LOC_Os07g15370 | metal transporter Nramp6, putative, expressed                                                | 1.37 | down | 1.98 | down | 5.96   | down | 1.35 | down | 1.66 | down | 1.29 | up   | ABA |
| Os.9421.1.S1_at   | LOC_Os10g11500 | SCP-like extracellular protein, expressed                                                    | 1.44 | down | 1.20 | up   | 2.21   | down | 1.15 | down | 1.91 | down | 1.11 | down | ABA |
| Os.9423.1.S1_at   | LOC_Os02g35190 | chloride channel protein, putative, expressed                                                | 1.12 | down | 1.07 | down | 2.18   | up   | 1.21 | up   | 1.09 | up   | 1.73 | up   | ABA |
| Os.9424.1.S1_at   | LOC_Os04g38310 | expressed protein                                                                            | 1.03 | up   | 1.12 | down | 2.01   | down | 1.28 | down | 1.54 | down | 1.38 | down | ABA |
| Os.9431.1.A1_a_at | LOC_Os08g16610 | Rad21 / Rec8 like protein, putative, expressed                                               | 1.59 | down | 1.22 | up   | 3.61   | down | 1.31 | down | 1.69 | down | 1.42 | down | ABA |
| Os.9442.1.S1_s_at | LOC_Os03g50530 | expressed protein                                                                            | 1.03 | up   | 1.04 | down | 2.09   | down | 1.01 | down | 1.47 | down | 1.21 | up   | ABA |
| Os.9456.1.S1_at   | LOC_Os02g28170 | transferase family protein, putative, expressed                                              | 1.03 | down | 1.02 | down | 4.08   | up   | 1.01 | up   | 1.07 | down | 1.06 | up   | ABA |
| Os.9461.1.S1_at   | LOC_Os08g30810 | puromycin-sensitive aminopeptidase, putative, expressed                                      | 1.02 | up   | 1.05 | down | 2.08   | up   | 1.07 | up   | 1.11 | up   | 1.03 | down | ABA |
| Os.9471.1.S1_a_at | LOC_Os08g40790 | DNA repair ATPase-related, putative, expressed                                               | 1.12 | up   | 1.01 | up   | 2.12   | up   | 1.11 | down | 1.10 | up   | 1.09 | up   | ABA |
| Os.9484.1.S1_at   | LOC_Os12g09580 | leafbladeless1, putative, expressed                                                          | 1.26 | down | 1.11 | down | 2.36   | down | 1.03 | up   | 1.39 | down | 1.30 | down | ABA |
| Os.9484.1.S2_at   | LOC_Os12g09580 | leafbladeless1, putative, expressed                                                          | 1.01 | down | 1.14 | down | 2.82   | down | 1.06 | down | 1.66 | down | 1.56 | down | ABA |
| Os.9486.1.S1_at   | LOC_Os06g28124 | glycosyltransferase, putative, expressed                                                     | 1.11 | down | 2.20 | down | 1.45   | down | 1.36 | down | 1.03 | down | 1.60 | up   | BAP |
| Os.9487.1.S1_a_at | LOC_Os01g10250 | hydrolase, alpha/beta fold family domain containing protein, expressed                       | 1.14 | up   | 1.01 | up   | 2.28   | up   | 1.08 | down | 1.40 | up   | 1.10 | up   | ABA |
| Os.9506.1.S1_a_at | LOC_Os02g38020 | inorganic phosphate transporter 2-1, chloroplast precursor, putative, expressed              | 1.16 | up   | 1.17 | up   | 4.84   | down | 1.41 | down | 1.66 | down | 1.65 | down | ABA |
| Os.9523.1.S1_at   | LOC_Os04g32620 | ethylene-responsive transcription factor ERF114, putative, expressed                         | 1.03 | down | 1.11 | down | 4.54   | up   | 1.68 | up   | 3.03 | up   | 2.12 | up   | 3   |
| Os.9527.1.S1_at   | LOC_Os07g41460 | sulfotransferase domain containing protein, expressed                                        | 1.44 | up   | 1.20 | up   | 1.44   | down | 1.47 | up   | 3.03 | up   | 1.62 | down | SA  |
| Os.9530.2.S1_at   | LOC_Os01g40420 | CBS domain containing membrane protein, putative, expressed                                  | 1.08 | up   | 1.01 | down | 2.02   | up   | 1.07 | up   | 1.32 | up   | 1.05 | up   | ABA |
| Os.9530.2.S1_x_at | LOC_Os01g40420 | CBS domain containing membrane protein, putative, expressed                                  | 1.04 | up   | 1.01 | up   | 2.18   | up   | 1.26 | up   | 1.35 | up   | 1.33 | up   | ABA |
| Os.9534.1.S1_at   | LOC_Os01g65830 | acyl-desaturase, chloroplast precursor, putative, expressed                                  | 2.15 | down | 1.54 | up   | 1.38   | up   | 2.12 | up   | 1.53 | down | 1.32 | down | 2   |
| Os.9538.1.S1_s_at | LOC_Os06g39875 | ras-related protein, putative, expressed                                                     | 1.47 | up   | 1.08 | down | 12.45  | up   | 1.13 | up   | 2.60 | up   | 1.95 | down | 3   |
| Os.9544.1.A1_at   | LOC_Os07g07920 | LTP100 - Protease inhibitor/seed storage/LTP family protein precursor, expressed             | 1.25 | up   | 1.18 | up   | 7.84   | up   | 1.19 | down | 1.83 | up   | 1.35 | down | ABA |
| Os.9554.1.S1_at   | LOC_Os04g52504 | adhesive/proline-rich protein, putative, expressed                                           | 1.05 | up   | 1.00 | up   | 1.28   | down | 1.01 | down | 2.07 | up   | 1.57 | up   | SA  |
| Os.9573.1.A1_at   | AK243284       | Oryza sativa Japonica Group cDNA, clone: J100051M17, full insert sequence.                   | 1.16 | down | 1.06 | up   | 2.16   | down | 1.03 | up   | 1.30 | down | 1.08 | down | ABA |
| Os.9581.1.S1_a_at | LOC_Os06g22380 | expressed protein                                                                            | 1.11 | up   | 1.37 | down | 2.77   | down | 1.41 | down | 1.50 | down | 1.46 | down | ABA |
| Os.9594.1.S1_at   | LOC_Os08g05780 | expressed protein                                                                            | 1.02 | up   | 1.30 | up   | 10.24  | up   | 1.02 | up   | 1.54 | up   | 1.23 | up   | ABA |
| Os.9624.1.S1_a_at | LOC_Os08g42420 | expressed protein                                                                            | 1.14 | up   | 1.28 | down | 3.00   | up   | 1.01 | down | 1.16 | up   | 1.06 | down | ABA |
| Os.9626.1.S1_at   | LOC_Os08g44870 | MATE efflux family protein, putative, expressed                                              | 1.15 | up   | 1.10 | down | 6.93   | down | 1.22 | down | 1.39 | down | 1.51 | up   | ABA |
| Os.9638.1.S1_at   | LOC_Os08g01410 | phosphate/phosphoenolpyruvate translocator-related protein, putative, expressed              | 1.03 | down | 1.03 | up   | 4.35   | up   | 1.17 | up   | 1.22 | up   | 1.65 | up   | ABA |
| Os.9653.1.S1_at   | LOC_Os05g04360 | protein phosphatase 2C, putative, expressed                                                  | 1.36 | up   | 1.02 | up   | 3.02   | up   | 1.04 | up   | 1.06 | down | 1.12 | down | ABA |
| Os.9653.1.S1_s_at | LOC_Os05g04360 | protein phosphatase 2C, putative, expressed                                                  | 1.12 | up   | 1.13 | down | 2.92   | up   | 1.01 | up   | 1.08 | up   | 1.07 | down | ABA |
| Os.9654.2.S1_x_at | LOC_Os04g35840 | T-complex protein 11, putative, expressed                                                    | 1.12 | up   | 1.14 | down | 2.33   | up   | 1.14 | down | 1.02 | down | 1.06 | up   | ABA |
| Os.9659.1.S1_at   | LOC_Os08g17680 | stromal cell-derived factor 2-like protein precursor, putative, expressed                    | 2.26 | down | 1.07 | up   | 3.42   | down | 1.23 | up   | 1.24 | down | 1.09 | up   | 2   |
| Os.9661.1.S1_at   | LOC_Os03g04620 | CCT motif family protein, expressed                                                          | 1.01 | up   | 4.10 | up   | 1.23   | down | 1.37 | up   | 1.38 | up   | 1.01 | down | BAP |
| Os.9684.1.S1_at   | LOC_Os06g38960 | expressed protein                                                                            | 1.09 | up   | 1.05 | down | 2.44   | down | 1.31 | down | 1.46 | down | 1.26 | down | ABA |
| Os.9690.1.S1_at   | LOC_Os06g14390 | 1-aminocyclopropane-1-carboxylate oxidase homolog 4, putative, expressed                     | 1.04 | down | 1.06 | up   | 2.86   | down | 1.07 | down | 1.33 | down | 1.02 | down | ABA |
| Os.9704.1.S1_at   | LOC_Os01g12820 | harpin-induced protein, putative, expressed                                                  | 1.05 | down | 1.04 | down | 97.28  | up   | 1.00 | up   | 2.76 | up   | 1.03 | up   | 2   |
| Os.9713.2.S1_at   | LOC_Os05g51690 | CCT motif family protein, expressed                                                          | 1.27 | down | 1.76 | down | 1.46   | up   | 1.47 | up   | 2.44 | up   | 1.39 | down | SA  |
| Os.9729.1.S1_a_at | LOC_Os02g17390 | 3-hydroxyacyl-CoA dehydrogenase, putative, expressed                                         | 1.24 | up   | 1.08 | down | 1.81   | up   | 1.23 | up   | 2.06 | up   | 1.68 | up   | SA  |
| Os.9749.1.S1_at   | LOC_Os08g44340 | monodehydroascorbate reductase, putative, expressed                                          | 1.39 | up   | 1.14 | down | 2.86   | up   | 1.26 | up   | 3.22 | up   | 1.48 | up   | 2   |
| Os.9751.1.S1_at   | LOC_Os11g40090 | A49-like RNA polymerase I associated factor family protein, expressed                        | 1.08 | up   | 1.16 | up   | 2.59   | down | 1.06 | down | 1.64 | down | 1.38 | down | ABA |
| Os.9752.1.S1_a_at | LOC_Os12g03899 | major facilitator superfamily antiporter, putative, expressed                                | 1.11 | up   | 1.25 | down | 2.03   | up   | 1.70 | down | 4.31 | up   | 1.25 | up   | 2   |
| Os.9752.2.S1_x_at | LOC_Os12g03899 | major facilitator superfamily antiporter, putative, expressed                                | 1.47 | up   | 1.12 | down | 2.36   | up   | 1.60 | down | 3.99 | up   | 1.96 | up   | 3   |
| Os.9752.3.S1_x_at | LOC_Os12g03899 | major facilitator superfamily antiporter, putative, expressed                                | 1.36 | up   | 1.09 | down | 2.32   | up   | 1.39 | down | 3.74 | up   | 1.74 | up   | 2   |
| Os.9759.1.S1_x_at | LOC_Os05g46510 | polygalacturonase, putative, expressed                                                       | 1.35 | down | 1.15 | down | 3.24   | up   | 1.24 | up   | 1.67 | up   | 1.35 | up   | ABA |
| Os.9765.2.S1_at   | LOC_Os03g03470 | expressed protein                                                                            | 1.02 | up   | 1.15 | up   | 3.99   | down | 1.35 | down | 2.02 | down | 1.41 | down | 2   |
| Os.9767.1.S1_at   | LOC_Os03g38950 | chloroplast post-illumination chlorophyll fluorescence increase protein, putative, expressed | 1.96 | up   | 1.11 | up   | 2.00   | down | 1.09 | down | 1.23 | down | 1.02 | down | ABA |
| Os.9782.1.S1_at   | LOC_Os09g19930 | HOTHEAD precursor, putative, expressed                                                       | 1.20 | down | 1.15 | down | 2.58   | down | 1.10 | up   | 1.02 | down | 1.06 | down | ABA |
| Os.9788.1.S1_x_at | LOC_Os01g57740 | expressed protein                                                                            | 1.42 | up   | 1.18 | up   | 3.22   | up   | 1.14 | down | 1.07 | up   | 1.03 | down | ABA |
| Os.9790.2.S1_x_at | LOC_Os01g63880 | expressed protein                                                                            | 1.31 | up   | 1.53 | down | 3.11   | down | 1.13 | down | 1.13 | down | 1.23 | up   | ABA |
| Os.9792.1.S1_at   | LOC_Os02g05890 | EMB1303, putative, expressed                                                                 | 1.06 | up   | 1.07 | up   | 2.93   | down | 1.26 | down | 1.53 | down | 1.33 | down | ABA |
| Os.9795.1.S1_at   | LOC_Os05g23924 | glycosyl hydrolase family 10 protein, putative, expressed                                    | 1.02 | up   | 1.34 | down | 4.55   | up   | 1.51 | down | 1.35 | down | 1.04 | up   | ABA |
| Os.9798.1.S1_at   | LOC_Os06g39875 | ras-related protein, putative, expressed                                                     | 1.09 | down | 1.46 | up   | 3.37   | down | 1.27 | up   | 1.11 | up   | 1.17 | down | ABA |
| Os.9811.1.S1_at   | LOC_Os07g44004 | expressed protein                                                                            | 1.03 | down | 1.04 | up   | 2.00   | down | 1.06 | down | 1.30 | down | 1.06 | down | ABA |

|                       |                |                                                                                            |      |      |      |      |        |      |      |      |       |      |      |      |     |
|-----------------------|----------------|--------------------------------------------------------------------------------------------|------|------|------|------|--------|------|------|------|-------|------|------|------|-----|
| Os.9824.1.S2_at       | LOC_Os05g39690 | oxidoreductase, aldo/keto reductase family protein, putative, expressed                    | 1.23 | up   | 1.17 | up   | 105.18 | up   | 1.00 | down | 1.44  | up   | 1.14 | down | ABA |
| Os.9835.1.S1_a_at     | LOC_Os01g62020 | NAD dependent epimerase/dehydratase family domain containing protein, expressed            | 1.13 | up   | 1.04 | down | 2.12   | down | 1.34 | up   | 1.44  | down | 1.48 | up   | ABA |
| Os.9836.1.S1_at       | LOC_Os11g10590 | Hypothetical protein                                                                       | 1.16 | up   | 1.28 | up   | 4.98   | up   | 1.02 | down | 3.41  | up   | 1.70 | up   | 2   |
| Os.9838.1.S1_at       | LOC_Os02g07760 | aldehyde dehydrogenase, putative, expressed                                                | 1.08 | down | 1.00 | up   | 2.50   | up   | 1.01 | down | 1.03  | down | 1.17 | up   | ABA |
| Os.9840.1.S1_at       | LOC_Os10g17489 | UDP-glucuronosyl and UDP-glucosyl transferase domain containing protein, expressed         | 1.07 | up   | 1.31 | down | 3.05   | up   | 1.45 | up   | 2.86  | up   | 2.08 | up   | 3   |
| Os.9842.1.S1_at       | LOC_Os07g34020 | expressed protein                                                                          | 1.13 | up   | 1.28 | down | 6.12   | down | 2.12 | down | 1.11  | up   | 1.84 | down | 2   |
| Os.9848.1.S1_at       | LOC_Os05g10650 | 6-phosphofructokinase, putative, expressed                                                 | 1.60 | up   | 1.34 | up   | 4.52   | up   | 1.16 | down | 10.27 | up   | 2.27 | up   | 3   |
| Os.9858.1.S1_at       | LOC_Os06g35670 | expressed protein                                                                          | 1.09 | down | 1.01 | down | 2.02   | up   | 1.14 | up   | 1.01  | up   | 1.14 | up   | ABA |
| Os.9873.1.S1_at       | LOC_Os05g48416 | lipase-related, putative, expressed                                                        | 1.10 | down | 1.49 | up   | 63.63  | up   | 1.05 | up   | 1.03  | down | 1.09 | down | ABA |
| Os.9875.1.S1_at       | LOC_Os03g11210 | DUF538 domain containing protein, putative, expressed                                      | 1.09 | down | 1.05 | up   | 4.55   | down | 1.31 | down | 1.22  | up   | 1.18 | down | ABA |
| Os.9880.1.S1_a_at     | LOC_Os01g68480 | thioredoxin, putative, expressed                                                           | 1.24 | up   | 1.09 | up   | 2.30   | down | 1.16 | down | 1.44  | down | 1.22 | down | ABA |
| Os.9894.1.S1_at       | LOC_Os02g57120 | HEAT repeat family protein, putative, expressed                                            | 1.08 | up   | 1.23 | down | 6.56   | down | 1.00 | up   | 1.33  | down | 1.04 | down | ABA |
| Os.9923.1.S1_at       | LOC_Os03g08330 | ZIM domain containing protein, putative, expressed                                         | 2.98 | up   | 2.07 | up   | 2.11   | down | 1.31 | down | 1.06  | down | 4.76 | up   | 4   |
| Os.9945.1.S1_at       | LOC_Os03g43410 | OslAA12 - Auxin-responsive Aux/IAA gene family member, expressed                           | 4.59 | up   | 1.56 | up   | 3.83   | down | 1.10 | down | 1.13  | down | 1.43 | down | 2   |
| Os.9946.1.S1_at       | LOC_Os01g14830 | ribosomal protein L3, putative, expressed                                                  | 1.26 | up   | 1.32 | up   | 2.23   | down | 1.16 | up   | 1.41  | down | 1.14 | down | ABA |
| Os.9948.1.S1_at       | LOC_Os08g38880 | WD-40 repeat family protein, putative, expressed                                           | 1.02 | down | 1.01 | up   | 2.24   | up   | 1.02 | down | 1.14  | up   | 1.10 | down | ABA |
| Os.9954.1.S1_at       | LOC_Os03g42840 | calcineurin B, putative, expressed                                                         | 1.29 | up   | 1.04 | up   | 2.15   | up   | 1.04 | up   | 1.59  | up   | 1.30 | up   | ABA |
| Os.996.1.S1_at        | LOC_Os01g01620 | kinase, pfkB family, putative, expressed                                                   | 1.34 | down | 1.08 | up   | 2.37   | up   | 1.24 | up   | 1.12  | down | 1.04 | down | ABA |
| Os.9967.1.S1_at       | LOC_Os07g34580 | glycosyl hydrolases family 16, putative, expressed                                         | 1.53 | down | 1.16 | down | 2.90   | down | 1.15 | down | 1.59  | down | 1.79 | down | ABA |
| Os.9971.1.S1_s_at     | LOC_Os02g42850 | MYB family transcription factor, putative, expressed                                       | 2.07 | down | 1.02 | up   | 1.20   | up   | 1.22 | up   | 1.03  | down | 1.56 | up   | IAA |
| Os.9975.1.S1_at       | AK063845       | Oryza sativa (japonica cultivar-group) Os03g0280400 (Os03g0280400) mRNA, complete cds      | 1.02 | down | 1.08 | down | 10.09  | up   | 1.07 | up   | 1.41  | up   | 1.43 | down | ABA |
| Os.9978.1.S1_at       | AK121200       | Oryza sativa Japonica Group cDNA clone:J023087102, full insert sequence.                   | 1.05 | down | 1.10 | up   | 8.54   | up   | 1.06 | up   | 1.20  | up   | 1.12 | up   | ABA |
| Os.9978.1.S2_at       | AK121200       | Oryza sativa Japonica Group cDNA clone:J023087102, full insert sequence.                   | 1.01 | down | 1.01 | up   | 7.23   | up   | 1.01 | up   | 1.00  | up   | 1.02 | up   | ABA |
| Os.9979.1.S1_at       | LOC_Os09g22440 | expressed protein                                                                          | 1.00 | up   | 1.17 | down | 2.16   | up   | 1.01 | down | 1.09  | up   | 1.05 | up   | ABA |
| Os.9988.1.S1_at       | LOC_Os11g32890 | expressed protein                                                                          | 1.43 | down | 1.64 | up   | 182.06 | up   | 1.20 | up   | 1.48  | up   | 1.10 | down | ABA |
| OsAffx.10060.1.S1_at  | LOC_Os03g12660 | cytochrome P450, putative, expressed                                                       | 1.74 | up   | 4.69 | down | 1.56   | down | 1.04 | up   | 1.69  | down | 1.62 | down | BAP |
| OsAffx.10368.1.S1_at  | LOC_Os06g02250 | MYB family transcription factor, putative                                                  | 1.05 | up   | 1.04 | down | 10.03  | up   | 1.00 | up   | 1.09  | up   | 1.05 | down | ABA |
| OsAffx.10756.1.S1_x_a | LOC_Os02g47200 | transposon protein, putative, unclassified, expressed                                      | 1.48 | up   | 1.02 | down | 13.89  | up   | 1.40 | down | 1.34  | up   | 1.24 | up   | ABA |
| OsAffx.10905.3.S1_at  | LOC_Os01g04360 | hsp20/alpha crystallin family protein, putative, expressed                                 | 1.13 | up   | 1.12 | up   | 2.76   | up   | 1.37 | up   | 1.13  | down | 1.18 | down | ABA |
| OsAffx.10948.1.S1_at  | LOC_Os01g07030 | POEI40 - Pollen Ole e I allergen and extensin family protein precursor, expressed          | 1.12 | up   | 4.90 | up   | 1.11   | down | 1.03 | up   | 1.07  | down | 1.03 | down | BAP |
| OsAffx.10957.1.S1_at  | LOC_Os01g07850 | glyoxalase family protein, putative, expressed                                             | 5.88 | down | 1.06 | up   | 12.90  | down | 1.26 | up   | 3.77  | down | 3.83 | up   | 4   |
| OsAffx.10957.1.S1_x_a | LOC_Os01g07850 | glyoxalase family protein, putative, expressed                                             | 3.48 | down | 1.28 | down | 8.13   | down | 1.64 | up   | 3.96  | down | 3.40 | up   | 4   |
| OsAffx.10962.1.S1_x_a | LOC_Os01g08310 | serine/threonine protein phosphatase 2A 59 kDa regulatory subunit Bgamma isoform, putative | 1.48 | up   | 1.11 | down | 2.03   | down | 1.02 | down | 1.22  | down | 1.04 | up   | ABA |
| OsAffx.10973.1.S1_s_a | LOC_Os01g08760 | choline/ethanolamine kinase, putative                                                      | 1.08 | up   | 1.13 | up   | 2.90   | up   | 1.21 | up   | 1.12  | up   | 1.93 | up   | ABA |
| OsAffx.10973.1.S1_x_a | LOC_Os01g08760 | choline/ethanolamine kinase, putative                                                      | 1.05 | up   | 1.15 | up   | 3.52   | up   | 1.32 | up   | 1.01  | up   | 1.86 | up   | ABA |
| OsAffx.10973.2.S1_at  | LOC_Os01g08760 | choline/ethanolamine kinase, putative                                                      | 1.27 | down | 1.18 | down | 5.24   | up   | 1.32 | up   | 1.13  | up   | 1.97 | up   | ABA |
| OsAffx.10973.2.S1_s_a | LOC_Os01g12160 | OsGH3.3 - Probable indole-3-acetic acid-amido synthetase, expressed                        | 1.03 | up   | 1.21 | up   | 3.19   | up   | 1.27 | up   | 1.16  | up   | 1.67 | up   | ABA |
| OsAffx.10978.1.S1_at  | LOC_Os01g09080 | WRKY DNA-binding domain containing protein, expressed                                      | 1.33 | down | 1.09 | down | 2.13   | down | 1.30 | up   | 1.44  | up   | 1.46 | up   | ABA |
| OsAffx.11003.1.S1_s_a | LOC_Os01g10870 | CAMK_KIN1/SNF1/Nim1_like.7 - CAMK includes calcium/calmodulin dependent protein            | 1.01 | down | 1.00 | up   | 7.17   | up   | 1.00 | down | 1.00  | down | 1.01 | up   | ABA |
| OsAffx.11003.2.S1_at  | LOC_Os01g10870 | CAMK_KIN1/SNF1/Nim1_like.7 - CAMK includes calcium/calmodulin dependent protein            | 1.01 | down | 1.04 | up   | 130.15 | up   | 1.00 | down | 1.01  | down | 1.03 | up   | ABA |
| OsAffx.11075.1.S1_x_a | LOC_Os01g16146 | phenazine biosynthesis protein, putative, expressed                                        | 1.80 | up   | 1.51 | down | 1.58   | up   | 1.26 | down | 2.09  | up   | 1.77 | up   | SA  |
| OsAffx.11172.1.S1_at  | LOC_Os01g23530 | terpene synthase, putative                                                                 | 1.02 | down | 1.00 | up   | 1.03   | down | 1.00 | up   | 3.53  | up   | 1.03 | up   | SA  |
| OsAffx.11193.2.S1_at  | LOC_Os01g24730 | hypothetical protein                                                                       | 1.01 | up   | 1.01 | up   | 3.52   | up   | 1.02 | up   | 1.00  | up   | 1.03 | up   | ABA |
| OsAffx.11437.1.S1_at  | LOC_Os01g42350 | pleiotropic drug resistance protein, putative                                              | 1.61 | down | 2.71 | up   | 2.07   | up   | 1.03 | down | 1.04  | down | 1.02 | up   | 2   |
| OsAffx.11499.1.S1_at  | LOC_Os01g47190 | phosphoglycerate mutase, putative, expressed                                               | 1.49 | up   | 1.09 | up   | 2.54   | up   | 1.05 | up   | 1.04  | up   | 1.06 | down | ABA |
| OsAffx.11501.1.S1_x_a | LOC_Os01g47262 | AMSH-like protease, putative, expressed                                                    | 1.19 | up   | 1.16 | down | 3.06   | up   | 1.16 | down | 1.08  | up   | 1.14 | down | ABA |
| OsAffx.11516.1.S1_x_a | LOC_Os01g48310 | expressed protein                                                                          | 1.08 | down | 1.07 | down | 2.30   | up   | 1.03 | down | 1.18  | up   | 1.12 | up   | ABA |
| OsAffx.11535.1.S1_at  | LOC_Os01g49720 | glutathione S-transferase, putative, expressed                                             | 1.18 | up   | 1.21 | up   | 55.47  | up   | 1.10 | down | 2.98  | up   | 1.10 | up   | 2   |
| OsAffx.11552.1.S1_at  | 9629           | ---                                                                                        | 1.51 | down | 1.10 | down | 31.64  | down | 2.79 | down | 5.35  | down | 2.70 | down | 4   |
| OsAffx.11559.1.S1_at  | LOC_Os01g51420 | calcineurin B, putative, expressed                                                         | 1.21 | down | 1.19 | down | 3.49   | up   | 1.35 | up   | 1.25  | up   | 2.03 | up   | 2   |
| OsAffx.11701.1.S1_s_a | LOC_Os01g62610 | peptidyl-prolyl cis-trans isomerase, FKBP-type, putative, expressed                        | 1.04 | up   | 1.18 | up   | 25.91  | up   | 1.11 | down | 2.19  | up   | 1.04 | down | 2   |
| OsAffx.11734.1.S1_at  | LOC_Os01g64840 | aspartic proteinase nepenthesin-1 precursor, putative, expressed                           | 1.17 | down | 1.27 | down | 1.28   | down | 5.97 | up   | 1.04  | up   | 1.09 | down | ACC |
| OsAffx.11835.1.S1_x_a | LOC_Os01g73000 | copine, putative, expressed                                                                | 1.10 | up   | 1.14 | down | 2.55   | up   | 1.07 | up   | 1.31  | up   | 1.05 | up   | ABA |
| OsAffx.11891.1.S1_at  | LOC_Os02g04630 | sodium/calcium exchanger protein, putative, expressed                                      | 1.05 | down | 1.05 | up   | 5.39   | up   | 1.01 | down | 1.10  | up   | 1.06 | down | ABA |
| OsAffx.11915.1.S1_at  | LOC_Os02g06205 | phytosulfokine receptor precursor, putative, expressed                                     | 1.32 | up   | 1.11 | up   | 3.30   | up   | 1.08 | up   | 1.51  | up   | 1.08 | up   | ABA |

|                       |                |                                                                                  |       |      |      |      |       |      |      |      |       |      |       |      |     |
|-----------------------|----------------|----------------------------------------------------------------------------------|-------|------|------|------|-------|------|------|------|-------|------|-------|------|-----|
| OsAffx.11926.1.S1_s_a | LOC_Os02g07210 | OTU-like cysteine protease family protein, putative, expressed                   | 1.04  | up   | 1.03 | up   | 2.06  | up   | 1.03 | up   | 1.18  | up   | 1.23  | up   | ABA |
| OsAffx.11956.1.S1_at  | LOC_Os02g09480 | myb-like DNA-binding domain containing protein, putative, expressed              | 1.37  | up   | 1.18 | down | 7.35  | up   | 1.20 | down | 1.46  | up   | 1.11  | up   | ABA |
| OsAffx.11963.1.S1_at  | LOC_Os02g09830 | bZIP transcription factor domain containing protein, expressed                   | 2.15  | up   | 1.45 | down | 22.65 | up   | 1.00 | up   | 1.18  | up   | 1.02  | up   | 2   |
| OsAffx.12022.1.S1_s_a | LOC_Os02g13600 | expressed protein                                                                | 1.19  | up   | 1.66 | down | 4.20  | up   | 1.61 | up   | 1.05  | up   | 1.77  | up   | ABA |
| OsAffx.12052.1.S1_at  | LOC_Os02g15280 | VQ domain containing protein, putative, expressed                                | 1.24  | up   | 1.28 | up   | 2.55  | down | 1.07 | up   | 1.45  | down | 1.46  | down | ABA |
| OsAffx.12255.1.S1_at  | LOC_Os02g28720 | spotted leaf 11, putative, expressed                                             | 1.24  | up   | 1.40 | down | 4.93  | up   | 1.01 | up   | 1.58  | up   | 1.35  | up   | ABA |
| OsAffx.12451.1.S1_x_a | LOC_Os02g42220 | transposon protein, putative, unclassified, expressed                            | 1.10  | down | 1.18 | down | 2.02  | up   | 1.14 | down | 1.24  | down | 1.21  | down | ABA |
| OsAffx.12459.1.S1_at  | LOC_Os02g42650 | expansin precursor, putative, expressed                                          | 1.16  | up   | 1.86 | down | 2.41  | down | 1.18 | up   | 1.01  | down | 1.33  | up   | ABA |
| OsAffx.12561.1.S1_s_a | LOC_Os02g49160 | OslAA8 - Auxin-responsive Aux/IAA gene family member, expressed                  | 1.09  | up   | 1.13 | down | 2.62  | down | 1.09 | up   | 1.09  | up   | 1.24  | down | ABA |
| OsAffx.12566.1.S1_at  | LOC_Os02g49560 | bZIP transcription factor domain containing protein, expressed                   | 1.06  | up   | 3.93 | up   | 1.05  | down | 1.04 | down | 1.00  | down | 1.10  | down | BAP |
| OsAffx.12578.1.S1_at  | LOC_Os02g50480 | histidine kinase, putative, expressed                                            | 1.09  | up   | 1.02 | down | 2.20  | down | 1.20 | down | 1.26  | down | 1.05  | up   | ABA |
| OsAffx.12587.1.S1_s_a | LOC_Os02g51320 | helix-loop-helix DNA-binding domain containing protein, expressed                | 4.22  | up   | 1.01 | down | 1.19  | up   | 1.15 | up   | 1.41  | up   | 1.01  | up   | IAA |
| OsAffx.12613.1.S1_at  | 9630           | ---                                                                              | 1.01  | down | 1.02 | up   | 16.74 | up   | 1.00 | up   | 1.00  | down | 1.01  | up   | ABA |
| OsAffx.12626.1.S1_at  | LOC_Os02g53620 | nuclear transcription factor Y subunit, putative, expressed                      | 1.17  | up   | 2.02 | down | 5.24  | down | 1.34 | down | 1.40  | down | 2.44  | down | 3   |
| OsAffx.12634.1.S1_at  | LOC_Os02g54100 | expressed protein                                                                | 1.34  | up   | 1.11 | up   | 4.22  | up   | 1.02 | up   | 1.13  | up   | 1.11  | up   | ABA |
| OsAffx.12645.1.S1_s_a | LOC_Os02g54870 | expressed protein                                                                | 1.28  | down | 1.74 | up   | 4.73  | down | 3.12 | up   | 1.56  | down | 1.10  | down | 2   |
| OsAffx.12655.1.S1_at  | LOC_Os02g55580 | hypothetical protein                                                             | 14.82 | up   | 1.00 | up   | 1.05  | down | 1.00 | down | 1.01  | down | 1.03  | up   | IAA |
| OsAffx.12715.1.S1_at  | Os03g0121600   | ---                                                                              | 1.07  | up   | 2.14 | up   | 3.10  | up   | 1.07 | up   | 1.07  | up   | 16.53 | up   | 3   |
| OsAffx.12715.1.S1_x_a | Os03g0121600   | ---                                                                              | 1.03  | down | 2.25 | up   | 2.77  | up   | 1.10 | down | 1.10  | down | 10.52 | up   | 3   |
| OsAffx.12721.1.S1_at  | LOC_Os03g03510 | CAMK_KIN1/SNF1/Nim1_like.15 - CAMK includes calcium/calmodulin dependet protein  | 1.01  | down | 1.07 | down | 2.35  | up   | 1.12 | down | 1.11  | up   | 1.13  | up   | ABA |
| OsAffx.12778.1.S1_at  | LOC_Os03g08200 | DUF567 domain containing protein, putative, expressed                            | 1.03  | down | 1.01 | down | 16.08 | up   | 1.01 | down | 1.00  | up   | 1.02  | down | ABA |
| OsAffx.12783.1.S1_at  | LOC_Os03g08530 | aminotransferase, classes I and II, domain containing protein, expressed         | 1.27  | up   | 1.28 | down | 5.17  | up   | 1.52 | up   | 15.84 | up   | 4.54  | up   | 3   |
| OsAffx.12799.1.S1_s_a | LOC_Os03g09170 | ethylene-responsive transcription factor, putative, expressed                    | 1.47  | up   | 1.47 | down | 7.86  | up   | 1.09 | down | 1.28  | up   | 1.24  | down | ABA |
| OsAffx.12806.1.S1_x_a | LOC_Os03g10220 | methyladenine glycosylase, putative                                              | 1.19  | up   | 1.25 | down | 2.34  | up   | 1.28 | down | 1.52  | down | 1.47  | down | ABA |
| OsAffx.12855.1.S1_at  | 9631           | ---                                                                              | 1.05  | down | 1.05 | down | 2.19  | up   | 1.04 | down | 1.06  | down | 1.03  | down | ABA |
| OsAffx.12887.2.S1_at  | LOC_Os03g16920 | DnaK family protein, putative, expressed                                         | 1.01  | down | 1.01 | down | 72.18 | up   | 1.14 | up   | 2.33  | up   | 1.00  | down | 2   |
| OsAffx.12887.2.S1_s_a | LOC_Os03g16920 | DnaK family protein, putative, expressed                                         | 1.31  | down | 1.03 | up   | 53.27 | up   | 1.21 | up   | 2.25  | up   | 1.01  | down | 2   |
| OsAffx.12910.1.S1_at  | LOC_Os03g18150 | protein phosphatase 2C, putative, expressed                                      | 1.03  | up   | 1.11 | down | 2.81  | up   | 1.07 | down | 1.06  | up   | 1.19  | down | ABA |
| OsAffx.12915.1.S1_at  | LOC_Os03g18300 | chloroplast unusual positioning protein, putative, expressed                     | 1.25  | down | 1.07 | down | 5.47  | down | 1.36 | down | 1.07  | down | 1.90  | up   | ABA |
| OsAffx.12920.1.S1_at  | LOC_Os03g18490 | RPGR, putative, expressed                                                        | 1.18  | up   | 1.18 | up   | 6.14  | up   | 1.02 | down | 1.03  | up   | 1.02  | down | ABA |
| OsAffx.12938.1.S1_at  | LOC_Os03g19570 | lip1 motif family protein, expressed                                             | 1.18  | up   | 1.08 | up   | 2.36  | down | 1.00 | down | 1.13  | down | 1.12  | down | ABA |
| OsAffx.12954.1.S1_at  | LOC_Os03g20680 | late embryogenesis abundant protein 1, putative, expressed                       | 1.05  | down | 1.15 | down | 2.94  | up   | 1.31 | down | 1.17  | down | 1.12  | down | ABA |
| OsAffx.12962.1.S1_at  | LOC_Os03g21000 | thioredoxin, putative, expressed                                                 | 1.04  | down | 1.42 | down | 2.70  | up   | 1.08 | down | 1.06  | down | 1.07  | down | ABA |
| OsAffx.12986.1.S1_at  | LOC_Os03g22200 | nodulin MtN3 family protein, putative, expressed                                 | 1.08  | up   | 1.22 | up   | 10.58 | up   | 1.67 | down | 2.40  | up   | 1.59  | up   | 2   |
| OsAffx.13014.1.S1_s_a | LOC_Os03g25050 | chaperonin, putative, expressed                                                  | 1.11  | down | 1.05 | down | 2.38  | down | 1.13 | down | 1.20  | down | 1.14  | down | ABA |
| OsAffx.13016.1.S1_at  | LOC_Os03g25150 | transposon protein, putative, unclassified, expressed                            | 1.22  | down | 2.29 | up   | 2.54  | down | 1.11 | up   | 3.02  | down | 1.39  | down | 3   |
| OsAffx.13016.1.S1_x_a | LOC_Os03g25150 | transposon protein, putative, unclassified, expressed                            | 1.14  | down | 2.52 | up   | 2.02  | down | 1.07 | up   | 2.53  | down | 1.74  | down | 3   |
| OsAffx.13360.1.S1_at  | LOC_Os03g45280 | dehydrin, putative, expressed                                                    | 1.03  | up   | 1.12 | down | 3.51  | up   | 1.68 | down | 1.19  | down | 2.91  | down | 2   |
| OsAffx.13377.1.S1_at  | LOC_Os03g46180 | LTPL71 - Protease inhibitor/seed storage/LTP family protein precursor, expressed | 1.25  | up   | 1.48 | up   | 3.60  | up   | 1.02 | down | 1.26  | up   | 1.06  | up   | ABA |
| OsAffx.13380.1.S1_at  | LOC_Os03g46300 | conserved hypothetical protein                                                   | 1.36  | up   | 1.46 | up   | 7.27  | down | 1.34 | down | 1.85  | down | 1.70  | down | ABA |
| OsAffx.13399.1.S1_at  | LOC_Os03g48010 | exostosin, putative, expressed                                                   | 1.03  | down | 1.05 | down | 2.93  | up   | 1.06 | up   | 1.12  | up   | 1.01  | up   | ABA |
| OsAffx.13423.1.S1_at  | LOC_Os03g49485 | expressed protein                                                                | 1.05  | up   | 1.11 | up   | 2.15  | down | 1.07 | down | 1.15  | down | 1.18  | down | ABA |
| OsAffx.13437.1.S1_at  | LOC_Os03g50280 | GLTP domain containing protein, putative, expressed                              | 1.26  | up   | 1.32 | down | 1.75  | up   | 1.18 | down | 1.10  | up   | 2.36  | down | JA  |
| OsAffx.13465.1.S1_at  | LOC_Os03g52180 | 4-hydroxy-3-methylbut-2-enyl diphosphate reductase, putative, expressed          | 1.15  | down | 3.88 | up   | 1.11  | down | 1.04 | down | 1.08  | down | 1.00  | up   | BAP |
| OsAffx.13491.1.S1_at  | LOC_Os03g55180 | DUF1336 domain containing protein, expressed                                     | 1.57  | up   | 1.69 | up   | 3.22  | down | 1.11 | up   | 1.09  | down | 1.61  | up   | ABA |
| OsAffx.13543.1.S1_s_a | LOC_Os03g58850 | uncharacterized PE-PGRS family protein PE_PGRS3 precursor, putative, expressed   | 1.23  | down | 1.15 | up   | 6.83  | up   | 1.21 | down | 1.73  | up   | 1.16  | up   | ABA |
| OsAffx.13553.1.S1_at  | LOC_Os03g59670 | basic helix-loop-helix, putative, expressed                                      | 1.02  | down | 1.24 | up   | 2.42  | down | 1.16 | up   | 1.22  | down | 1.42  | up   | ABA |
| OsAffx.13602.1.S1_at  | LOC_Os03g60430 | AP2 domain containing protein, expressed                                         | 1.26  | up   | 1.79 | down | 4.43  | down | 1.30 | down | 1.07  | down | 1.23  | up   | ABA |
| OsAffx.13615.1.S1_at  | LOC_Os04g01740 | heat shock protein, putative, expressed                                          | 1.03  | down | 1.02 | down | 1.02  | down | 1.00 | down | 2.45  | up   | 1.11  | up   | SA  |
| OsAffx.13765.1.S1_at  | LOC_Os04g11060 | expressed protein                                                                | 1.83  | down | 2.34 | up   | 11.87 | down | 2.15 | down | 11.74 | down | 11.38 | down | 5   |
| OsAffx.13902.1.S1_at  | LOC_Os04g21130 | F-box protein PP2-B1, putative, expressed                                        | 1.16  | up   | 1.01 | up   | 2.42  | down | 1.72 | down | 1.10  | down | 1.06  | down | ABA |
| OsAffx.13941.1.S1_at  | LOC_Os04g23580 | xylosyltransferase, putative, expressed                                          | 1.07  | up   | 1.71 | down | 16.88 | up   | 1.06 | down | 1.32  | up   | 1.71  | up   | ABA |
| OsAffx.13950.2.S1_x_a | LOC_Os04g24170 | RNA recognition motif containing protein, putative, expressed                    | 1.09  | up   | 1.09 | up   | 2.28  | down | 1.13 | down | 1.38  | down | 1.16  | down | ABA |
| OsAffx.13951.2.S1_s_a | LOC_Os04g24310 | retrotransposon protein, putative, unclassified                                  | 1.14  | down | 2.05 | up   | 1.04  | up   | 1.06 | up   | 1.13  | down | 8.92  | up   | 2   |
| OsAffx.14027.1.S1_at  | LOC_Os04g28850 | RALFL36 - Rapid Alkalinization Factor RALF family protein precursor, expressed   | 1.23  | down | 1.66 | up   | 3.38  | down | 1.13 | up   | 2.60  | up   | 1.27  | up   | 2   |

|                       |                |                                                                            |      |      |      |      |        |      |      |      |       |      |      |      |     |
|-----------------------|----------------|----------------------------------------------------------------------------|------|------|------|------|--------|------|------|------|-------|------|------|------|-----|
| OsAffx.14113.1.S1_at  | LOC_Os04g33490 | neutral/alkaline invertase, putative, expressed                            | 1.31 | up   | 1.04 | down | 31.70  | up   | 2.27 | up   | 2.73  | up   | 3.33 | up   | 4   |
| OsAffx.14113.1.S1_s_a | LOC_Os04g33490 | neutral/alkaline invertase, putative, expressed                            | 1.07 | down | 1.36 | down | 11.56  | up   | 1.22 | up   | 1.65  | up   | 1.33 | up   | ABA |
| OsAffx.14149.1.S1_at  | LOC_Os04g35270 | alpha-1,4-fucosyltransferase, putative, expressed                          | 1.12 | down | 1.06 | down | 8.70   | up   | 1.06 | down | 1.11  | up   | 1.07 | down | ABA |
| OsAffx.14165.1.S1_x_a | LOC_Os04g35750 | expressed protein                                                          | 1.42 | down | 1.48 | down | 10.64  | down | 1.04 | down | 9.49  | down | 1.47 | down | 2   |
| OsAffx.14196.1.S1_at  | LOC_Os04g38860 | expressed protein                                                          | 1.73 | up   | 2.26 | down | 2.43   | down | 1.25 | down | 1.19  | down | 1.67 | up   | 2   |
| OsAffx.14201.1.S1_at  | LOC_Os04g39360 | heavy metal transport                                                      | 1.13 | down | 1.38 | down | 11.47  | down | 1.71 | up   | 4.34  | down | 2.28 | up   | 3   |
| OsAffx.14202.1.S1_at  | LOC_Os04g39380 | heavy metal transport/detoxification protein, putative, expressed          | 1.20 | down | 1.58 | down | 4.88   | down | 1.84 | up   | 1.95  | down | 1.39 | up   | ABA |
| OsAffx.14231.1.S1_at  | LOC_Os04g41400 | peptide transporter PTR2, putative, expressed                              | 1.15 | down | 1.72 | up   | 3.85   | down | 1.07 | up   | 1.56  | down | 1.19 | up   | ABA |
| OsAffx.14278.1.S1_at  | LOC_Os04g45590 | glyoxalase family protein, putative, expressed                             | 1.17 | up   | 1.10 | down | 3.87   | up   | 1.27 | up   | 2.41  | up   | 1.01 | up   | 2   |
| OsAffx.14384.1.S1_at  | LOC_Os04g52890 | ATBAG1, putative, expressed                                                | 1.12 | up   | 1.03 | down | 2.20   | up   | 1.11 | up   | 1.33  | up   | 1.11 | up   | ABA |
| OsAffx.14425.1.S1_at  | LOC_Os04g55200 | coatamer subunit epsilon, putative, expressed                              | 1.01 | down | 1.00 | up   | 8.75   | down | 1.00 | up   | 1.03  | up   | 1.02 | up   | ABA |
| OsAffx.14430.1.S1_s_a | LOC_Os04g55980 | glycine-rich RNA-binding, abscisic acid-inducible protein, putative        | 1.17 | up   | 1.34 | up   | 1.29   | up   | 2.86 | up   | 4.99  | up   | 1.17 | up   | 2   |
| OsAffx.14448.1.S1_at  | LOC_Os04g56930 | glycosyl hydrolases, putative, expressed                                   | 1.51 | down | 1.66 | down | 3.28   | down | 1.39 | up   | 2.79  | up   | 1.79 | down | 2   |
| OsAffx.14458.1.S1_x_a | LOC_Os04g57760 | expressed protein                                                          | 2.19 | up   | 1.82 | up   | 4.92   | up   | 1.10 | up   | 1.31  | up   | 1.96 | up   | 3   |
| OsAffx.14464.1.S1_at  | LOC_Os04g58070 | aspartic proteinase nepenthesin precursor, putative, expressed             | 1.00 | down | 1.01 | down | 3.62   | up   | 1.01 | down | 1.01  | up   | 1.01 | up   | ABA |
| OsAffx.14473.1.S1_at  | LOC_Os04g58740 | expressed protein                                                          | 5.33 | up   | 1.04 | up   | 1.05   | down | 1.01 | down | 1.01  | down | 1.03 | up   | IAA |
| OsAffx.14474.1.S1_at  | LOC_Os04g58890 | expressed protein                                                          | 1.55 | up   | 1.07 | down | 2.94   | up   | 1.19 | up   | 1.63  | up   | 1.62 | up   | ABA |
| OsAffx.14519.1.S1_s_a | LOC_Os05g03070 | transporter, putative, expressed                                           | 1.02 | up   | 1.18 | down | 3.24   | up   | 1.11 | down | 1.06  | up   | 1.30 | up   | ABA |
| OsAffx.14523.1.S1_s_a | LOC_Os05g03130 | OsRC12-7 - Putative low temperature and salt responsive protein, expressed | 1.02 | up   | 1.03 | up   | 796.78 | up   | 1.02 | down | 1.10  | down | 1.08 | down | ABA |
| OsAffx.14631.1.S1_at  | LOC_Os05g11130 | cytochrome P450, putative, expressed                                       | 2.12 | down | 1.88 | down | 1.74   | down | 1.01 | down | 1.21  | down | 1.30 | down | IAA |
| OsAffx.14641.1.S1_at  | LOC_Os05g11620 | expressed protein                                                          | 3.32 | up   | 1.83 | down | 36.19  | up   | 1.00 | up   | 1.02  | down | 1.02 | up   | 2   |
| OsAffx.14656.1.S1_at  | LOC_Os05g12320 | nodulin MtN3 family protein, putative, expressed                           | 1.25 | up   | 2.39 | down | 1.14   | down | 2.16 | down | 3.46  | down | 1.19 | down | 3   |
| OsAffx.14689.1.S1_at  | LOC_Os05g14370 | WRKY DNA-binding domain containing protein, expressed                      | 1.09 | up   | 1.11 | up   | 1.17   | down | 1.04 | up   | 34.58 | up   | 1.10 | down | SA  |
| OsAffx.14759.1.S1_s_a | LOC_Os05g19270 | MSH-like DNA mismatch repair protein, putative, expressed                  | 1.07 | down | 1.01 | down | 3.12   | down | 1.08 | down | 1.95  | down | 1.14 | down | ABA |
| OsAffx.14766.1.S1_at  | LOC_Os05g20020 | polygalacturonase, putative, expressed                                     | 1.66 | down | 2.13 | down | 1.13   | up   | 1.15 | down | 1.05  | down | 1.05 | down | BAP |
| OsAffx.14810.1.S1_at  | LOC_Os05g24684 | structural constituent of ribosome, putative, expressed                    | 1.15 | up   | 1.21 | down | 2.73   | up   | 1.14 | up   | 1.62  | up   | 1.47 | up   | ABA |
| OsAffx.14929.1.S1_x_a | LOC_Os05g32810 | expressed protein                                                          | 1.09 | up   | 1.13 | up   | 2.88   | down | 1.19 | down | 1.37  | down | 1.10 | down | ABA |
| OsAffx.14937.1.S1_at  | LOC_Os05g33320 | expressed protein                                                          | 1.32 | up   | 1.05 | down | 2.98   | up   | 1.23 | up   | 2.15  | up   | 1.07 | up   | 2   |
| OsAffx.14981.1.S1_at  | LOC_Os05g36050 | serine/threonine-protein kinase, putative, expressed                       | 1.11 | down | 1.20 | up   | 2.21   | down | 1.20 | down | 1.44  | down | 1.25 | down | ABA |
| OsAffx.14990.1.S1_at  | LOC_Os05g37050 | MYB family transcription factor, putative, expressed                       | 1.40 | down | 2.43 | up   | 1.17   | down | 1.16 | up   | 1.06  | up   | 1.35 | up   | BAP |
| OsAffx.14991.1.S1_at  | LOC_Os05g37210 | eukaryotic protein of unknown function DUF914 domain containing protein    | 1.03 | down | 1.02 | down | 3.48   | up   | 1.01 | up   | 1.01  | down | 1.02 | up   | ABA |
| OsAffx.15013.1.S1_at  | LOC_Os05g38670 | cation efflux family protein, putative                                     | 1.04 | down | 1.00 | up   | 4.92   | up   | 1.09 | up   | 1.01  | up   | 1.02 | down | ABA |
| OsAffx.15019.1.S1_s_a | LOC_Os05g39060 | expressed protein                                                          | 1.32 | up   | 1.25 | down | 4.62   | up   | 1.16 | down | 1.44  | up   | 1.08 | up   | ABA |
| OsAffx.15020.1.S1_at  | LOC_Os05g39070 | NLI interacting factor-like phosphatase, putative, expressed               | 1.04 | up   | 1.11 | down | 2.87   | up   | 1.04 | up   | 1.19  | up   | 1.17 | up   | ABA |
| OsAffx.15035.1.S1_at  | LOC_Os05g40070 | WRKY DNA-binding domain containing protein, expressed                      | 1.09 | up   | 1.14 | down | 1.64   | down | 2.12 | up   | 32.01 | up   | 1.67 | down | 2   |
| OsAffx.15081.1.S1_at  | LOC_Os05g43230 | oryzain alpha chain precursor, putative, expressed                         | 1.15 | down | 1.13 | down | 1.14   | up   | 1.02 | up   | 1.16  | down | 2.05 | up   | JA  |
| OsAffx.15116.1.S1_at  | LOC_Os05g45740 | mitochondrial ATP synthase g subunit family protein, putative, expressed   | 1.01 | up   | 1.14 | up   | 2.33   | down | 1.01 | up   | 1.17  | down | 1.07 | down | ABA |
| OsAffx.15138.1.S1_at  | LOC_Os05g47660 | lipid phosphatase protein, putative, expressed                             | 1.04 | down | 1.17 | down | 2.46   | up   | 1.13 | up   | 1.11  | up   | 1.43 | down | ABA |
| OsAffx.15154.1.S1_at  | LOC_Os05g48650 | transcription factor HBP-1b, putative, expressed                           | 1.22 | down | 1.06 | up   | 40.14  | up   | 1.69 | down | 2.26  | up   | 1.46 | up   | 2   |
| OsAffx.15155.1.S1_at  | LOC_Os05g48730 | hypothetical protein                                                       | 3.28 | up   | 1.25 | down | 1.15   | down | 1.05 | up   | 1.05  | up   | 1.14 | down | IAA |
| OsAffx.15160.1.S1_at  | LOC_Os05g48890 | fasciclin domain containing protein, expressed                             | 2.61 | down | 1.19 | down | 4.86   | down | 1.37 | down | 2.45  | down | 1.50 | down | 3   |
| OsAffx.15160.1.S1_s_a | LOC_Os05g48890 | fasciclin domain containing protein, expressed                             | 1.85 | down | 1.04 | up   | 3.73   | down | 1.18 | down | 2.23  | down | 1.17 | down | 2   |
| OsAffx.15177.1.S1_at  | LOC_Os05g50260 | polygalacturonase, putative, expressed                                     | 1.71 | down | 1.12 | up   | 2.31   | up   | 1.80 | up   | 1.87  | down | 1.41 | down | ABA |
| OsAffx.15177.1.S1_x_a | LOC_Os05g50260 | polygalacturonase, putative, expressed                                     | 1.69 | down | 1.21 | up   | 2.40   | up   | 1.77 | up   | 1.95  | down | 1.53 | down | ABA |
| OsAffx.15178.1.S1_s_a | AK241528       | myb family transcription factor                                            | 1.23 | up   | 3.74 | up   | 13.98  | down | 1.88 | down | 5.00  | down | 3.43 | down | 4   |
| OsAffx.15193.1.S1_at  | LOC_Os05g51390 | uncharacterized protein PA4923, putative, expressed                        | 3.29 | up   | 1.06 | up   | 1.83   | up   | 1.14 | up   | 2.29  | up   | 1.49 | up   | 2   |
| OsAffx.15279.1.S1_x_a | LOC_Os06g05860 | 6-phosphofructokinase, putative, expressed                                 | 1.00 | up   | 1.24 | down | 2.58   | down | 1.16 | up   | 1.48  | down | 1.10 | down | ABA |
| OsAffx.15312.1.S1_at  | LOC_Os06g08540 | formin-like protein 13, putative, expressed                                | 1.08 | up   | 1.16 | down | 3.64   | down | 1.19 | up   | 1.01  | down | 1.14 | down | ABA |
| OsAffx.15319.1.S1_at  | LOC_Os06g08830 | UDP-glucuronosyl and UDP-glucosyl transferase, putative, expressed         | 1.41 | down | 2.67 | up   | 9.25   | down | 1.09 | down | 1.57  | down | 1.33 | down | 2   |
| OsAffx.15384.1.S1_at  | LOC_Os06g12290 | glutathione S-transferase GSTU6, putative                                  | 1.07 | up   | 1.03 | up   | 30.63  | up   | 1.01 | down | 1.28  | up   | 1.02 | down | ABA |
| OsAffx.15391.1.S1_at  | LOC_Os06g12500 | membrane associated DUF588 domain containing protein, putative, expressed  | 9.93 | up   | 6.01 | up   | 1.08   | down | 1.02 | down | 1.02  | down | 1.01 | up   | 2   |
| OsAffx.15442.1.S1_at  | LOC_Os06g15600 | plastocyanin-like domain containing protein, putative, expressed           | 3.18 | up   | 1.12 | down | 1.02   | down | 2.23 | down | 1.23  | up   | 1.47 | down | 2   |
| OsAffx.15474.1.S1_s_a | LOC_Os06g17450 | expressed protein                                                          | 1.46 | up   | 1.34 | up   | 5.41   | up   | 1.05 | down | 1.04  | down | 1.06 | down | ABA |
| OsAffx.15484.1.S1_at  | LOC_Os06g18820 | serine threonine kinase, putative, expressed                               | 1.00 | up   | 1.02 | up   | 3.21   | up   | 1.02 | down | 1.03  | up   | 1.28 | up   | ABA |
| OsAffx.15485.1.S1_at  | LOC_Os06g18900 | cadmium tolerance factor, putative, expressed                              | 1.06 | up   | 1.09 | down | 4.80   | down | 1.30 | up   | 1.18  | down | 1.22 | up   | ABA |

|                       |                |                                                                                      |      |      |      |      |       |      |      |      |       |      |       |      |     |
|-----------------------|----------------|--------------------------------------------------------------------------------------|------|------|------|------|-------|------|------|------|-------|------|-------|------|-----|
| OsAffx.15523.1.S1_at  | LOC_Os06g20610 | seven in absentia protein family domain containing protein, expressed                | 1.12 | up   | 1.23 | down | 3.34  | up   | 1.08 | up   | 1.12  | up   | 1.03  | up   | ABA |
| OsAffx.15533.1.S1_at  | LOC_Os06g21140 | glycine-rich cell wall structural protein precursor, putative, expressed             | 1.08 | down | 1.47 | up   | 1.79  | down | 1.70 | down | 2.32  | down | 1.77  | down | SA  |
| OsAffx.15538.1.S1_at  | LOC_Os06g21570 | Os6bglu24 - beta-glucosidase homologue, similar to G. max isohydroxyurate hydrolase  | 1.45 | up   | 1.40 | up   | 25.70 | down | 1.46 | down | 24.46 | down | 23.37 | down | 3   |
| OsAffx.15562.1.S1_s_a | LOC_Os06g22870 | OslAA21 - Auxin-responsive Aux/IAA gene family member, expressed                     | 1.33 | up   | 1.32 | down | 2.05  | down | 1.35 | down | 1.41  | down | 1.19  | down | ABA |
| OsAffx.15898.1.S1_s_a | LOC_Os06g42700 | zinc finger, C3HC4 type domain containing protein, expressed                         | 1.11 | up   | 1.09 | up   | 2.03  | up   | 1.07 | up   | 1.08  | up   | 1.02  | up   | ABA |
| OsAffx.15903.1.S1_s_a | LOC_Os06g43044 | GDLS-like lipase/acylhydrolase, putative, expressed                                  | 1.14 | down | 1.41 | down | 2.57  | down | 1.38 | down | 1.80  | down | 1.06  | down | ABA |
| OsAffx.15908.1.S1_x_a | LOC_Os06g43410 | cytochrome P450, putative, expressed                                                 | 1.01 | down | 1.00 | down | 2.36  | up   | 1.00 | down | 1.02  | up   | 1.00  | up   | ABA |
| OsAffx.15951.1.S1_at  | LOC_Os06g46350 | PLA IIIA/PLP7, putative, expressed                                                   | 1.25 | up   | 1.40 | up   | 3.73  | up   | 1.78 | down | 1.04  | up   | 1.47  | up   | ABA |
| OsAffx.16008.1.S1_at  | LOC_Os06g50420 | plastocyanin-like domain containing protein, putative, expressed                     | 2.05 | up   | 1.49 | down | 4.10  | down | 1.04 | down | 2.46  | up   | 1.04  | down | 3   |
| OsAffx.16059.1.S1_at  | LOC_Os07g03120 | expressed protein                                                                    | 1.04 | up   | 1.91 | down | 6.76  | up   | 1.39 | down | 1.31  | up   | 2.49  | up   | 2   |
| OsAffx.16082.1.S1_at  | LOC_Os07g04560 | no apical meristem protein, putative                                                 | 1.76 | up   | 3.79 | up   | 1.65  | up   | 1.60 | down | 1.96  | up   | 1.07  | up   | BAP |
| OsAffx.16108.1.S1_at  | LOC_Os07g05740 | receptor-like protein kinase 2 precursor, putative, expressed                        | 1.15 | down | 1.21 | down | 2.95  | down | 1.15 | down | 1.01  | down | 1.19  | up   | ABA |
| OsAffx.16154.1.S1_at  | LOC_Os07g08320 | RNA recognition motif containing protein, expressed                                  | 1.00 | down | 1.02 | down | 3.04  | up   | 1.01 | up   | 1.01  | up   | 1.02  | up   | ABA |
| OsAffx.16482.1.S1_at  | LOC_Os07g29750 | glycosyl hydrolases family 16, putative, expressed                                   | 1.56 | up   | 1.02 | up   | 5.02  | down | 1.03 | down | 1.22  | up   | 1.95  | up   | ABA |
| OsAffx.16482.1.S1_x_a | LOC_Os07g29750 | glycosyl hydrolases family 16, putative, expressed                                   | 1.42 | up   | 1.13 | up   | 5.84  | down | 1.18 | down | 1.12  | down | 1.53  | up   | ABA |
| OsAffx.16631.1.S1_at  | LOC_Os07g39210 | expressed protein                                                                    | 1.50 | up   | 1.11 | down | 3.80  | down | 1.16 | up   | 1.45  | down | 1.49  | down | ABA |
| OsAffx.16669.1.S1_at  | LOC_Os07g41160 | protein of unknown function DUF1675 domain containing protein, expressed             | 1.92 | up   | 1.93 | up   | 40.79 | up   | 1.05 | up   | 1.05  | up   | 1.07  | down | ABA |
| OsAffx.16677.1.S1_at  | LOC_Os07g41600 | proline-rich protein, putative, expressed                                            | 1.10 | up   | 1.07 | down | 3.36  | up   | 1.15 | down | 1.61  | up   | 2.18  | up   | 2   |
| OsAffx.16682.1.S1_at  | LOC_Os07g42220 | expressed protein                                                                    | 1.02 | down | 1.02 | down | 3.11  | up   | 1.10 | up   | 1.70  | down | 1.03  | up   | ABA |
| OsAffx.16693.1.S1_x_a | LOC_Os07g43322 | expressed protein                                                                    | 1.25 | up   | 1.08 | up   | 2.03  | up   | 1.07 | up   | 1.06  | up   | 1.12  | up   | ABA |
| OsAffx.16695.1.S1_s_a | LOC_Os07g43440 | expressed protein                                                                    | 1.02 | down | 1.00 | down | 7.03  | up   | 1.00 | up   | 1.03  | down | 1.02  | down | ABA |
| OsAffx.16697.1.S1_at  | LOC_Os07g43540 | ORC6 - Putative origin recognition complex subunit 6, expressed                      | 1.36 | down | 1.01 | up   | 6.48  | down | 1.15 | down | 2.09  | down | 1.98  | down | 3   |
| OsAffx.16752.1.S1_at  | LOC_Os07g47540 | DUF567 domain containing protein, putative, expressed                                | 1.12 | down | 1.56 | down | 1.54  | down | 1.08 | up   | 1.09  | up   | 13.98 | up   | JA  |
| OsAffx.16767.1.S1_at  | LOC_Os07g48890 | expressed protein                                                                    | 1.35 | down | 1.21 | down | 2.50  | up   | 1.01 | up   | 1.25  | up   | 1.13  | down | ABA |
| OsAffx.16767.2.S1_x_a | LOC_Os07g48890 | expressed protein                                                                    | 1.13 | down | 1.01 | up   | 2.72  | up   | 1.01 | down | 1.03  | up   | 1.03  | up   | ABA |
| OsAffx.16770.1.S1_at  | LOC_Os07g49390 | P-protein, putative, expressed                                                       | 1.06 | down | 1.13 | down | 1.38  | down | 1.17 | up   | 1.02  | up   | 2.49  | up   | JA  |
| OsAffx.16770.1.S1_x_a | LOC_Os07g49390 | P-protein, putative, expressed                                                       | 1.08 | up   | 1.05 | down | 1.49  | down | 1.08 | up   | 1.01  | up   | 2.32  | up   | JA  |
| OsAffx.16772.1.S1_at  | LOC_Os08g01190 | ATOPF18/OPF18, putative, expressed                                                   | 1.08 | down | 3.78 | up   | 1.11  | down | 1.01 | down | 1.14  | up   | 1.00  | up   | BAP |
| OsAffx.16792.1.S1_at  | LOC_Os08g02500 | ACT domain containing protein, putative                                              | 2.14 | up   | 1.50 | down | 1.43  | up   | 1.43 | down | 1.28  | up   | 1.04  | down | IAA |
| OsAffx.16875.1.S1_x_a | LOC_Os08g07390 | mla1, putative, expressed                                                            | 1.08 | down | 1.13 | down | 4.62  | up   | 1.01 | down | 1.18  | up   | 1.01  | up   | ABA |
| OsAffx.16911.1.S1_at  | LOC_Os08g09240 | autophagy-related protein, putative, expressed                                       | 1.13 | down | 1.09 | down | 2.03  | up   | 1.04 | down | 1.04  | up   | 1.07  | down | ABA |
| OsAffx.17113.1.S1_at  | LOC_Os08g23290 | serine/threonine-protein kinase BR11-like 2 precursor, putative                      | 2.00 | up   | 1.98 | down | 1.15  | down | 1.02 | up   | 1.34  | up   | 1.17  | up   | IAA |
| OsAffx.17216.1.S1_at  | LOC_Os08g28880 | patatin, putative, expressed                                                         | 1.37 | up   | 1.24 | up   | 1.56  | down | 1.29 | up   | 1.23  | up   | 3.50  | up   | JA  |
| OsAffx.17267.1.S1_at  | LOC_Os08g31280 | DC1, putative, expressed                                                             | 1.00 | up   | 1.02 | down | 1.02  | down | 1.17 | up   | 10.71 | up   | 1.03  | up   | SA  |
| OsAffx.17347.1.S1_at  | LOC_Os08g35470 | exo70 exocyst complex subunit, putative, expressed                                   | 1.06 | down | 1.18 | down | 3.14  | up   | 1.19 | up   | 1.06  | up   | 1.08  | up   | ABA |
| OsAffx.17364.1.S1_at  | LOC_Os08g36820 | expressed protein                                                                    | 2.85 | up   | 1.02 | down | 1.01  | down | 1.02 | down | 1.04  | down | 1.00  | up   | IAA |
| OsAffx.17366.1.S1_at  | LOC_Os08g36920 | AP2 domain containing protein, expressed                                             | 1.29 | down | 1.01 | down | 39.15 | up   | 1.17 | down | 3.38  | up   | 1.02  | up   | 2   |
| OsAffx.17389.1.S1_s_a | LOC_Os08g37930 | beta-expansin precursor, putative, expressed                                         | 1.97 | down | 1.46 | up   | 4.42  | down | 1.46 | down | 1.08  | down | 1.14  | down | ABA |
| OsAffx.17457.1.S1_at  | LOC_Os08g41420 | expressed protein                                                                    | 1.00 | down | 1.46 | down | 3.97  | up   | 1.08 | up   | 1.34  | up   | 1.01  | up   | ABA |
| OsAffx.17463.1.S1_at  | LOC_Os08g41750 | OsFBX303 - F-box domain containing protein, expressed                                | 1.01 | down | 1.00 | up   | 3.23  | up   | 1.02 | up   | 1.00  | up   | 1.03  | up   | ABA |
| OsAffx.17468.1.S1_s_a | LOC_Os08g42080 | ACR5, putative, expressed                                                            | 2.46 | down | 3.38 | up   | 4.61  | down | 1.30 | up   | 1.81  | down | 1.51  | down | 3   |
| OsAffx.17505.1.S1_at  | LOC_Os08g43770 | carrier, putative                                                                    | 5.15 | up   | 1.39 | down | 1.41  | down | 1.41 | down | 1.34  | down | 1.40  | down | IAA |
| OsAffx.17506.1.S1_at  | LOC_Os08g43900 | carrier, putative, expressed                                                         | 2.05 | up   | 1.02 | down | 1.04  | down | 1.01 | down | 1.01  | down | 1.01  | up   | IAA |
| OsAffx.17516.1.S1_at  | LOC_Os08g44940 | DUF260 domain containing protein, putative, expressed                                | 9.15 | up   | 1.49 | down | 1.42  | down | 1.13 | down | 1.42  | down | 2.75  | down | 2   |
| OsAffx.17894.1.S1_at  | LOC_Os09g25650 | GEX2, putative, expressed                                                            | 1.01 | down | 1.00 | up   | 2.21  | up   | 1.01 | up   | 1.03  | up   | 1.02  | up   | ABA |
| OsAffx.17906.1.S1_x_a | LOC_Os09g26210 | ZOS9-12 - C2H2 zinc finger protein, expressed                                        | 1.58 | down | 1.22 | up   | 1.90  | down | 2.56 | down | 1.03  | down | 2.51  | up   | 2   |
| OsAffx.17922.1.S1_x_a | LOC_Os01g59250 | expressed protein                                                                    | 2.10 | up   | 2.73 | up   | 6.59  | down | 1.04 | up   | 1.32  | down | 1.21  | down | 3   |
| OsAffx.17972.1.S1_at  | LOC_Os09g31270 | polygalacturonase, putative, expressed                                               | 1.21 | down | 1.00 | down | 6.99  | up   | 1.04 | up   | 1.26  | up   | 1.21  | up   | ABA |
| OsAffx.17976.1.S1_at  | LOC_Os09g31410 | Os9bglu29 - beta-glucosidase homologue, similar to Os4bglu12 exoglucanase, expressed | 1.68 | down | 1.22 | up   | 5.00  | down | 1.71 | down | 2.24  | down | 1.32  | down | 2   |
| OsAffx.18005.1.S1_at  | LOC_Os09g36070 | cytochrome P450, putative                                                            | 1.20 | down | 1.04 | up   | 4.34  | down | 1.04 | down | 3.31  | down | 3.20  | down | 3   |
| OsAffx.18042.1.S1_at  | LOC_Os09g38100 | phosphate carrier protein, mitochondrial precursor, putative, expressed              | 2.56 | up   | 1.65 | up   | 2.03  | up   | 1.05 | up   | 2.87  | up   | 1.54  | up   | 3   |
| OsAffx.18050.2.S1_at  | LOC_Os02g56370 | OsWAK20 - OsWAK receptor-like protein kinase, expressed                              | 1.05 | up   | 1.02 | down | 6.23  | down | 1.88 | up   | 1.30  | down | 1.11  | down | ABA |
| OsAffx.18298.1.S1_at  | LOC_Os10g19160 | receptor kinase, putative, expressed                                                 | 1.03 | down | 1.00 | up   | 34.46 | up   | 1.03 | down | 1.01  | down | 1.00  | up   | ABA |
| OsAffx.18396.1.S1_at  | LOC_Os10g25450 | OsSub60 - Putative Subtilisin homologue, expressed                                   | 1.11 | down | 1.45 | down | 3.46  | down | 1.07 | down | 1.46  | down | 1.01  | up   | ABA |
| OsAffx.18575.1.S1_x_a | LOC_Os10g39140 | flavonol synthase/flavanone 3-hydroxylase, putative, expressed                       | 1.02 | up   | 1.10 | down | 3.06  | down | 1.28 | up   | 1.23  | up   | 1.54  | up   | ABA |

|                       |                |                                                                                       |       |      |      |      |        |      |       |      |       |      |       |      |     |
|-----------------------|----------------|---------------------------------------------------------------------------------------|-------|------|------|------|--------|------|-------|------|-------|------|-------|------|-----|
| OsAffx.18586.1.S1_at  | LOC_Os10g40020 | oxidoreductase, short chain dehydrogenase/reductase family domain containing family   | 1.17  | down | 1.09 | down | 3.78   | up   | 1.28  | down | 1.30  | up   | 1.12  | up   | ABA |
| OsAffx.18589.1.S1_s_a | LOC_Os10g40480 | LTPL143 - Protease inhibitor/seed storage/LTP family protein precursor, expressed     | 1.17  | down | 1.59 | up   | 1.12   | up   | 1.15  | up   | 1.78  | down | 5.08  | down | JA  |
| OsAffx.18681.1.S1_s_a | LOC_Os11g05170 | expressed protein                                                                     | 1.90  | up   | 2.33 | up   | 13.13  | up   | 1.29  | up   | 3.39  | up   | 1.07  | down | 3   |
| OsAffx.18737.1.S1_at  | LOC_Os11g07911 | expressed protein                                                                     | 1.03  | down | 1.09 | down | 714.33 | up   | 1.06  | down | 1.71  | up   | 1.13  | down | ABA |
| OsAffx.18758.1.S1_at  | LOC_Os11g09110 | receptor-like protein kinase 5 precursor, putative                                    | 1.00  | up   | 1.00 | up   | 4.16   | up   | 1.01  | up   | 1.22  | up   | 1.02  | up   | ABA |
| OsAffx.18836.1.S1_at  | LOC_Os11g13890 | chlorophyll A-B binding protein, putative, expressed                                  | 1.34  | down | 1.43 | down | 11.49  | down | 2.01  | down | 1.75  | down | 2.16  | down | 3   |
| OsAffx.1887.1.S1_x_at | LOC_Os10g39470 | expressed protein                                                                     | 1.54  | up   | 1.53 | down | 2.14   | up   | 2.05  | down | 1.50  | up   | 1.34  | down | 2   |
| OsAffx.19111.1.S1_s_a | LOC_Os11g31900 | acyl carrier protein, putative, expressed                                             | 1.05  | up   | 1.02 | up   | 3.16   | down | 1.09  | down | 1.43  | down | 1.21  | down | ABA |
| OsAffx.19165.1.S1_at  | LOC_Os11g35040 | aminotransferase, classes I and II, domain containing protein, expressed              | 2.25  | up   | 3.62 | up   | 2.51   | up   | 1.37  | up   | 8.64  | up   | 4.31  | up   | 5   |
| OsAffx.19171.1.S1_s_a | LOC_Os11g35274 | protein kinase domain containing protein, expressed                                   | 1.08  | down | 1.34 | down | 4.31   | down | 1.14  | down | 1.15  | down | 1.18  | up   | ABA |
| OsAffx.193.1.S1_x_at  | LOC_Os10g25020 | red chlorophyll catabolite reductase, putative                                        | 1.09  | up   | 1.02 | down | 4.40   | up   | 1.01  | up   | 1.20  | up   | 1.09  | up   | ABA |
| OsAffx.19332.1.S1_at  | LOC_Os11g42430 | transporter family protein, putative, expressed                                       | 2.72  | down | 1.53 | down | 24.44  | down | 1.89  | down | 2.39  | down | 5.35  | up   | 4   |
| OsAffx.19357.1.S1_at  | LOC_Os11g43790 | DUF581 domain containing protein, expressed                                           | 1.00  | down | 1.00 | down | 237.39 | up   | 1.00  | up   | 1.00  | up   | 1.02  | up   | ABA |
| OsAffx.19438.1.S1_at  | LOC_Os11g01030 | conserved hypothetical protein                                                        | 1.79  | down | 6.02 | down | 1.11   | down | 1.06  | down | 1.07  | down | 1.06  | down | BAP |
| OsAffx.19451.3.S1_x_a | LOC_Os02g13190 | F-box family protein, putative, expressed                                             | 1.05  | down | 1.06 | up   | 2.39   | down | 1.06  | up   | 1.40  | down | 1.03  | down | ABA |
| OsAffx.19478.1.S1_at  | LOC_Os11g04150 | major facilitator superfamily antiporter, putative, expressed                         | 1.06  | down | 2.23 | up   | 4.57   | up   | 1.62  | down | 1.01  | down | 1.04  | down | 2   |
| OsAffx.19515.1.S1_s_a | LOC_Os12g06080 | hypothetical protein                                                                  | 2.93  | up   | 1.33 | up   | 1.62   | up   | 2.53  | down | 1.08  | down | 1.57  | up   | 2   |
| OsAffx.19632.1.S1_at  | LOC_Os12g12590 | NADP-dependent oxidoreductase, putative, expressed                                    | 2.12  | up   | 1.19 | down | 1.14   | down | 1.28  | down | 1.17  | up   | 1.34  | up   | IAA |
| OsAffx.19633.1.S1_at  | LOC_Os12g12600 | dirigent, putative, expressed                                                         | 4.37  | down | 1.47 | down | 33.99  | down | 10.26 | down | 18.00 | down | 3.84  | up   | 5   |
| OsAffx.19635.1.S1_at  | LOC_Os12g12720 | jasmonate-induced protein, putative, expressed                                        | 1.16  | down | 1.47 | down | 3.79   | down | 1.66  | down | 4.33  | down | 20.27 | up   | 3   |
| OsAffx.19698.1.S1_at  | LOC_Os12g15920 | laccase precursor protein, putative, expressed                                        | 3.92  | down | 1.10 | up   | 4.67   | down | 1.45  | down | 4.20  | down | 1.92  | down | 3   |
| OsAffx.19817.2.S1_at  | LOC_Os01g69010 | MATE efflux protein, putative                                                         | 1.15  | up   | 1.01 | up   | 7.52   | up   | 1.00  | down | 1.00  | down | 1.01  | up   | ABA |
| OsAffx.19841.1.S1_at  | LOC_Os12g26880 | plastocyanin-like domain containing protein, putative, expressed                      | 1.07  | down | 1.01 | up   | 2.59   | down | 1.46  | down | 2.19  | down | 1.15  | up   | 2   |
| OsAffx.20067.1.S1_s_a | LOC_Os12g41090 | CAMK_KIN1/SNF1/Nim1_like.38 - CAMK includes calcium/calmodulin dependent protein      | 1.87  | down | 1.07 | down | 2.56   | down | 1.20  | down | 1.12  | down | 1.68  | down | ABA |
| OsAffx.20100.1.S1_x_a | LOC_Os03g05410 | hypothetical protein                                                                  | 1.01  | down | 1.02 | up   | 6.04   | up   | 1.03  | up   | 1.02  | up   | 1.01  | up   | ABA |
| OsAffx.20100.2.S1_x_a | LOC_Os04g33120 | retrotransposon protein, putative, unclassified                                       | 1.01  | up   | 1.01 | up   | 4.53   | up   | 1.04  | up   | 1.01  | down | 1.03  | up   | ABA |
| OsAffx.20109.1.S1_at  | LOC_Os12g43820 | GCRP5 - Glycine and cysteine rich family protein precursor, expressed                 | 1.01  | down | 1.01 | up   | 2.25   | up   | 1.01  | down | 1.01  | up   | 1.05  | down | ABA |
| OsAffx.20116.1.S1_at  | LOC_Os12g44290 | cytochrome P450, putative, expressed                                                  | 1.09  | down | 1.07 | down | 1.02   | down | 1.01  | up   | 1.50  | up   | 12.76 | up   | JA  |
| OsAffx.20132.1.S1_at  | 9638           | ---                                                                                   | 1.20  | up   | 1.18 | up   | 11.96  | up   | 1.03  | up   | 1.00  | down | 1.12  | up   | ABA |
| OsAffx.20242.2.S1_at  | LOC_Os10g34040 | nodulin, putative, expressed                                                          | 1.03  | down | 1.02 | down | 1.01   | down | 3.96  | up   | 1.19  | up   | 1.02  | up   | ACC |
| OsAffx.20285.2.S1_at  | LOC_Os05g43530 | CSLC7 - cellulose synthase-like family C, expressed                                   | 1.02  | up   | 1.07 | down | 2.19   | down | 1.18  | down | 1.19  | down | 1.41  | up   | ABA |
| OsAffx.20360.1.S1_x_a | LOC_Os10g26410 | bHLH family protein, putative, expressed                                              | 11.70 | up   | 1.32 | up   | 1.31   | down | 1.10  | down | 1.09  | down | 1.09  | down | IAA |
| OsAffx.2070.2.S1_at   | LOC_Os01g23850 | transposon protein, putative, CACTA, En/Spm sub-class, expressed                      | 1.34  | down | 1.19 | down | 3.01   | down | 1.00  | up   | 1.17  | down | 1.47  | down | ABA |
| OsAffx.20724.2.S1_s_a | LOC_Os10g07010 | 3-ketoacyl-CoA synthase, putative, expressed                                          | 1.83  | down | 1.16 | down | 3.71   | up   | 1.33  | up   | 1.54  | up   | 5.96  | up   | 2   |
| OsAffx.20736.2.S1_at  | LOC_Os01g73100 | retrotransposon protein, putative, unclassified                                       | 1.03  | up   | 1.00 | up   | 2.21   | up   | 1.02  | up   | 1.02  | up   | 1.05  | up   | ABA |
| OsAffx.21062.1.S1_at  | NM_001053028   | Oryza sativa (japonica cultivar-group) Os02g0263300 (Os02g0263300) mRNA, complete cds | 1.01  | down | 1.01 | down | 2.24   | up   | 1.00  | up   | 1.00  | down | 1.04  | up   | ABA |
| OsAffx.21077.1.S1_at  | NM_194147      | ---                                                                                   | 1.34  | down | 2.01 | up   | 4.08   | down | 1.40  | down | 3.92  | down | 3.76  | down | 4   |
| OsAffx.21102.2.S1_x_a | LOC_Os01g25660 | hypothetical protein                                                                  | 1.03  | up   | 1.12 | up   | 1.66   | down | 1.13  | up   | 1.35  | down | 2.19  | up   | JA  |
| OsAffx.21410.1.S1_x_a | LOC_Os01g40560 | hypersensitive-induced response protein, putative, expressed                          | 1.71  | down | 1.59 | down | 6.54   | down | 1.74  | up   | 6.43  | down | 5.86  | down | 3   |
| OsAffx.21591.1.S1_at  | LOC_Os01g56660 | expressed protein                                                                     | 3.42  | up   | 1.09 | down | 1.03   | down | 1.00  | down | 1.00  | down | 1.05  | up   | IAA |
| OsAffx.21616.1.S1_s_a | LOC_Os01g54890 | ethylene-responsive transcription factor 2, putative, expressed                       | 2.26  | up   | 1.40 | down | 1.98   | up   | 1.38  | up   | 3.45  | up   | 1.54  | up   | 3   |
| OsAffx.2170.1.S1_s_at | LOC_Os01g36880 | hypothetical protein                                                                  | 2.46  | up   | 1.02 | down | 1.13   | down | 1.08  | up   | 1.02  | down | 1.01  | down | IAA |
| OsAffx.2171.1.S1_at   | LOC_Os01g36950 | N-rich protein, putative, expressed                                                   | 2.27  | up   | 1.14 | down | 4.51   | up   | 1.04  | down | 2.54  | up   | 1.61  | up   | 3   |
| OsAffx.21742.2.S1_at  | LOC_Os01g62780 | hypothetical protein                                                                  | 1.07  | up   | 1.18 | up   | 2.10   | up   | 1.36  | up   | 1.24  | up   | 1.54  | up   | ABA |
| OsAffx.21844.1.S1_at  | LOC_Os01g70150 | hypothetical protein                                                                  | 1.01  | down | 1.00 | up   | 1.02   | down | 1.00  | up   | 1.23  | up   | 16.57 | up   | JA  |
| OsAffx.21963.1.S1_s_a | LOC_Os01g19770 | mitochondrial import inner membrane translocase subunit Tim17, putative, expressed    | 1.01  | down | 1.00 | up   | 323.85 | up   | 1.00  | down | 1.00  | up   | 1.03  | up   | ABA |
| OsAffx.21988.1.S1_at  | LOC_Os08g06190 | berberine and berberine like domain containing protein, expressed                     | 1.08  | down | 1.27 | down | 2.60   | up   | 1.05  | down | 2.31  | up   | 1.41  | down | 2   |
| OsAffx.22181.1.S1_s_a | LOC_Os01g17050 | VQ domain containing protein, putative, expressed                                     | 1.04  | down | 1.05 | down | 2.96   | down | 1.25  | down | 1.30  | down | 1.66  | down | ABA |
| OsAffx.22225.2.S1_at  | LOC_Os01g14990 | GCRP6 - Glycine and cysteine rich family protein precursor, putative, expressed       | 1.01  | down | 1.00 | up   | 6.38   | up   | 1.00  | down | 1.00  | up   | 1.00  | up   | ABA |
| OsAffx.22225.2.S1_s_a | LOC_Os01g14990 | GCRP6 - Glycine and cysteine rich family protein precursor, expressed                 | 1.01  | down | 1.00 | up   | 9.64   | up   | 1.00  | down | 1.01  | up   | 1.01  | up   | ABA |
| OsAffx.22469.1.S1_x_a | LOC_Os07g07040 | erythrocyte binding protein 3, putative, expressed                                    | 1.09  | down | 1.22 | down | 14.83  | up   | 1.01  | down | 1.13  | up   | 1.24  | up   | ABA |
| OsAffx.22529.1.S1_s_a | LOC_Os07g46830 | sex determination protein tasselseed-2, putative, expressed                           | 1.01  | down | 5.11 | up   | 1.03   | down | 1.00  | up   | 1.00  | down | 1.01  | up   | BAP |
| OsAffx.22569.1.S1_x_a | LOC_Os06g07914 | hydroxylase, putative, expressed                                                      | 1.01  | down | 2.21 | up   | 1.01   | down | 1.00  | up   | 1.00  | down | 1.01  | up   | BAP |
| OsAffx.22569.2.S1_x_a | LOC_Os06g07914 | hydroxylase, putative, expressed                                                      | 1.01  | up   | 3.95 | up   | 1.11   | down | 1.08  | down | 1.11  | down | 1.06  | down | BAP |
| OsAffx.22584.1.S1_at  | LOC_Os06g06390 | NBS-LRR type disease resistance protein, putative, expressed                          | 1.00  | down | 1.01 | down | 2.05   | up   | 1.00  | down | 1.12  | up   | 1.01  | up   | ABA |

|                       |                |                                                                                   |       |      |      |      |       |      |      |      |       |      |      |      |     |
|-----------------------|----------------|-----------------------------------------------------------------------------------|-------|------|------|------|-------|------|------|------|-------|------|------|------|-----|
| OsAffx.22650.1.S1_x_a | LOC_Os03g61480 | uncharacterized Cys-rich domain containing protein, putative                      | 1.28  | up   | 1.23 | up   | 2.17  | down | 1.48 | up   | 1.10  | down | 1.65 | up   | ABA |
| OsAffx.22650.2.S1_x_a | LOC_Os03g61470 | uncharacterized Cys-rich domain containing protein, putative, expressed           | 1.28  | up   | 1.48 | up   | 2.23  | down | 1.71 | up   | 1.09  | down | 1.05 | up   | ABA |
| OsAffx.22754.1.S1_s_a | LOC_Os01g07410 | growth regulator related protein, putative, expressed                             | 1.06  | down | 1.58 | up   | 2.21  | down | 1.17 | down | 1.43  | down | 1.13 | down | ABA |
| OsAffx.22754.1.S1_x_a | LOC_Os01g07410 | growth regulator related protein, putative, expressed                             | 1.17  | down | 1.37 | up   | 2.33  | down | 1.10 | down | 1.43  | down | 1.00 | up   | ABA |
| OsAffx.2280.1.S1_at   | LOC_Os01g49280 | zinc finger family protein, putative, expressed                                   | 1.09  | down | 1.30 | down | 4.89  | up   | 1.41 | down | 1.10  | down | 1.00 | down | ABA |
| OsAffx.23005.1.S1_x_a | AK108349       | Oryza sativa Japonica Group cDNA clone:002-142-B10, full insert sequence.         | 2.19  | up   | 1.01 | up   | 2.93  | down | 1.12 | up   | 1.04  | down | 1.14 | down | 2   |
| OsAffx.2304.1.S1_s_at | LOC_Os01g51780 | auxin efflux carrier component, putative, expressed                               | 3.17  | up   | 1.07 | down | 1.02  | down | 1.07 | up   | 1.00  | down | 1.01 | up   | IAA |
| OsAffx.23051.1.S1_x_a | LOC_Os01g02000 | phosphate transporter 1, putative, expressed                                      | 1.03  | down | 1.19 | up   | 2.65  | up   | 1.39 | down | 1.34  | down | 1.42 | down | ABA |
| OsAffx.23090.1.S1_x_a | AK243318       | receptor serine/threonine kinase, putative                                        | 1.25  | up   | 1.10 | up   | 2.84  | up   | 1.08 | down | 1.71  | up   | 1.34 | up   | ABA |
| OsAffx.23090.4.S1_x_a | LOC_Os01g02460 | receptor kinase LRK10, putative                                                   | 1.10  | up   | 1.05 | down | 2.35  | up   | 1.02 | down | 1.40  | up   | 1.28 | up   | ABA |
| OsAffx.2315.1.S1_at   | LOC_Os01g52540 | B3 DNA binding domain containing protein, expressed                               | 1.09  | down | 1.02 | up   | 2.28  | up   | 1.23 | up   | 1.06  | up   | 1.02 | up   | ABA |
| OsAffx.23156.1.S1_at  | LOC_Os01g07800 | thiol-disulphide oxidoreductase DCC, putative, expressed                          | 1.04  | up   | 1.28 | down | 2.09  | up   | 1.14 | down | 1.08  | up   | 1.00 | down | ABA |
| OsAffx.23175.1.S1_x_a | LOC_Os01g09880 | harpin-induced protein 1 domain containing protein, expressed                     | 1.05  | up   | 1.12 | down | 2.31  | down | 1.23 | down | 1.76  | down | 1.36 | up   | ABA |
| OsAffx.23225.1.S1_at  | LOC_Os01g13425 | expressed protein                                                                 | 1.03  | down | 1.09 | down | 9.80  | up   | 1.20 | up   | 1.40  | up   | 1.09 | up   | ABA |
| OsAffx.23248.1.S1_at  | LOC_Os01g14710 | conserved hypothetical protein                                                    | 2.66  | down | 1.51 | down | 8.95  | down | 1.15 | up   | 2.22  | down | 4.14 | down | 4   |
| OsAffx.2326.1.S1_x_at | LOC_Os01g53800 | glutamate carboxypeptidase 2, putative, expressed                                 | 1.48  | down | 1.79 | down | 3.24  | down | 1.24 | down | 1.96  | down | 1.69 | down | ABA |
| OsAffx.2326.2.S1_at   | LOC_Os01g53800 | glutamate carboxypeptidase 2, putative, expressed                                 | 1.36  | down | 1.34 | down | 2.06  | down | 1.25 | down | 1.40  | down | 1.24 | down | ABA |
| OsAffx.23292.1.S1_at  | LOC_Os01g18584 | OsWRKY9 - Superfamily of TFs having WRKY and zinc finger domains, expressed       | 2.32  | down | 1.43 | down | 1.30  | up   | 1.07 | up   | 1.14  | up   | 1.37 | up   | IAA |
| OsAffx.2348.1.S1_at   | LOC_Os01g57050 | expressed protein                                                                 | 1.10  | up   | 1.84 | up   | 1.64  | down | 1.56 | down | 2.22  | down | 1.18 | down | SA  |
| OsAffx.23482.1.S1_x_a | LOC_Os01g32980 | mitochondrial carrier protein, putative, expressed                                | 1.09  | up   | 1.00 | down | 2.65  | up   | 1.07 | up   | 1.06  | down | 1.26 | up   | ABA |
| OsAffx.23482.2.S1_at  | LOC_Os01g32980 | mitochondrial carrier protein, putative, expressed                                | 1.21  | up   | 1.06 | up   | 2.27  | up   | 1.03 | down | 1.09  | up   | 1.06 | down | ABA |
| OsAffx.23594.1.S1_at  | LOC_Os01g40094 | protein phosphatase 2C, putative, expressed                                       | 1.52  | up   | 1.60 | down | 31.38 | up   | 2.06 | down | 2.69  | up   | 1.08 | up   | 3   |
| OsAffx.23595.1.S1_at  | LOC_Os01g40094 | protein phosphatase 2C, putative, expressed                                       | 1.04  | up   | 1.05 | down | 4.79  | up   | 1.02 | up   | 1.01  | down | 1.05 | up   | ABA |
| OsAffx.2361.1.S1_x_at | LOC_Os01g58850 | circadian clock coupling factor-related, putative, expressed                      | 1.00  | down | 1.01 | down | 9.80  | up   | 1.01 | down | 1.10  | up   | 1.05 | up   | ABA |
| OsAffx.2362.1.S1_at   | LOC_Os01g59000 | cytochrome P450, putative, expressed                                              | 1.07  | down | 1.12 | up   | 3.09  | up   | 1.32 | down | 2.18  | up   | 1.94 | up   | 2   |
| OsAffx.2362.1.S1_s_at | LOC_Os01g59000 | cytochrome P450, putative, expressed                                              | 1.07  | up   | 1.77 | up   | 2.12  | up   | 1.23 | down | 1.41  | up   | 1.10 | down | ABA |
| OsAffx.23652.1.S1_at  | LOC_Os01g43890 | OsSCP4 - Putative Serine Carboxypeptidase homologue, expressed                    | 4.29  | up   | 1.23 | up   | 3.22  | down | 1.02 | up   | 3.21  | up   | 1.84 | up   | 3   |
| OsAffx.23673.1.S1_at  | LOC_Os01g45670 | expressed protein                                                                 | 1.72  | down | 1.23 | down | 2.49  | up   | 1.15 | up   | 1.01  | down | 1.38 | up   | ABA |
| OsAffx.23718.2.S1_x_a | LOC_Os05g48330 | aspartyl protease family protein, putative, expressed                             | 1.04  | up   | 1.59 | up   | 5.91  | up   | 1.17 | up   | 1.17  | up   | 1.41 | down | ABA |
| OsAffx.23744.1.S1_s_a | LOC_Os01g51310 | expressed protein                                                                 | 1.50  | down | 1.26 | down | 12.80 | up   | 1.03 | up   | 1.23  | down | 1.22 | down | ABA |
| OsAffx.23754.1.S1_x_a | LOC_Os01g51870 | methyltransferase, putative, expressed                                            | 1.03  | down | 1.01 | down | 2.12  | up   | 1.02 | down | 5.22  | up   | 1.74 | up   | 2   |
| OsAffx.23787.2.S1_at  | LOC_Os01g54360 | hypothetical protein                                                              | 1.13  | down | 1.21 | down | 1.05  | down | 1.02 | down | 1.02  | down | 3.04 | up   | JA  |
| OsAffx.23810.1.S1_at  | LOC_Os01g56560 | cyclase/dehydrase family protein, expressed                                       | 1.19  | up   | 1.03 | down | 2.99  | up   | 1.09 | up   | 1.44  | up   | 1.44 | up   | ABA |
| OsAffx.23819.1.S1_at  | LOC_Os01g57370 | cyclic nucleotide-gated ion channel 2, putative, expressed                        | 1.04  | up   | 1.05 | up   | 2.24  | up   | 1.01 | up   | 1.03  | up   | 1.16 | up   | ABA |
| OsAffx.23927.2.S1_at  | LOC_Os01g65550 | RNA recognition motif containing protein, putative, expressed                     | 1.17  | up   | 1.06 | down | 2.07  | down | 1.10 | down | 1.47  | down | 1.13 | up   | ABA |
| OsAffx.23951.1.S1_x_a | LOC_Os01g67100 | expressed protein                                                                 | 1.18  | down | 1.07 | down | 4.08  | down | 1.28 | down | 2.33  | down | 1.50 | down | 2   |
| OsAffx.23951.3.S1_x_a | LOC_Os01g67100 | expressed protein                                                                 | 1.24  | down | 1.10 | down | 9.77  | down | 1.06 | up   | 2.46  | down | 1.55 | down | 2   |
| OsAffx.23978.1.S1_at  | LOC_Os01g68960 | conserved hypothetical protein                                                    | 1.01  | down | 1.00 | up   | 2.75  | up   | 1.07 | up   | 1.10  | up   | 1.05 | up   | ABA |
| OsAffx.24050.1.S1_at  | LOC_Os02g01700 | RNA recognition motif containing protein, putative                                | 1.13  | down | 1.19 | up   | 4.00  | up   | 1.07 | up   | 1.08  | down | 1.43 | down | ABA |
| OsAffx.24089.1.S1_x_a | LOC_Os02g03870 | periplasmic beta-glucosidase precursor, putative, expressed                       | 1.82  | down | 1.00 | up   | 3.69  | down | 1.31 | down | 2.19  | down | 1.23 | down | 2   |
| OsAffx.24138.1.S1_s_a | AK242133       | Oryza sativa Japonica Group cDNA, clone: J075149F15, full insert sequence.        | 1.43  | up   | 2.42 | down | 9.56  | up   | 1.03 | down | 1.11  | down | 1.12 | up   | 2   |
| OsAffx.24153.1.S1_s_a | LOC_Os02g07690 | VQ domain containing protein, putative, expressed                                 | 1.81  | up   | 1.27 | up   | 2.09  | up   | 1.16 | up   | 1.17  | up   | 1.44 | up   | ABA |
| OsAffx.24157.1.S1_s_a | LOC_Os02g07930 | B-box zinc finger family protein, putative, expressed                             | 1.08  | up   | 1.05 | down | 3.67  | up   | 2.01 | up   | 1.13  | down | 1.13 | down | 2   |
| OsAffx.24166.1.S1_at  | LOC_Os02g08440 | OsWRKY71 - Superfamily of TFs having WRKY and zinc finger domains, expressed      | 1.40  | up   | 1.20 | up   | 1.09  | down | 1.15 | up   | 1.01  | down | 2.32 | up   | JA  |
| OsAffx.24189.1.S1_at  | LOC_Os02g10730 | expressed protein                                                                 | 1.47  | up   | 1.22 | down | 2.51  | up   | 1.27 | up   | 1.48  | up   | 1.06 | up   | ABA |
| OsAffx.24237.1.S1_x_a | LOC_Os06g35900 | BES1/BZR1 homolog protein, putative, expressed                                    | 2.32  | up   | 1.16 | down | 1.30  | up   | 1.14 | down | 1.18  | up   | 1.37 | down | IAA |
| OsAffx.24317.1.S1_x_a | LOC_Os01g14040 | transposon protein, putative, unclassified                                        | 1.03  | down | 1.08 | up   | 3.81  | up   | 1.10 | down | 1.12  | down | 1.23 | down | ABA |
| OsAffx.2442.1.S1_x_at | LOC_Os01g69830 | OsSPL2 - SBP-box gene family member, expressed                                    | 1.06  | up   | 1.74 | down | 3.24  | up   | 1.32 | down | 1.07  | up   | 1.52 | up   | ABA |
| OsAffx.24484.1.S1_at  | LOC_Os02g28850 | Kinesin motor domain domain containing protein, expressed                         | 1.24  | down | 1.24 | down | 4.51  | up   | 1.26 | down | 1.55  | down | 1.05 | up   | ABA |
| OsAffx.24492.1.S1_at  | LOC_Os02g29210 | ankyrin, putative, expressed                                                      | 1.17  | down | 1.09 | down | 3.40  | up   | 1.18 | up   | 1.32  | up   | 1.30 | down | ABA |
| OsAffx.24599.1.S1_s_a | LOC_Os02g36510 | ethylene-insensitive 3, putative, expressed                                       | 1.00  | down | 1.00 | up   | 3.50  | up   | 1.00 | up   | 1.00  | down | 1.01 | up   | ABA |
| OsAffx.24603.1.S1_at  | LOC_Os02g36810 | cytokinin-O-glucosyltransferase 2, putative                                       | 64.57 | up   | 1.30 | up   | 2.35  | up   | 1.51 | up   | 18.75 | up   | 4.69 | up   | 4   |
| OsAffx.24603.1.S1_x_a | LOC_Os02g36810 | cytokinin-O-glucosyltransferase 2, putative                                       | 21.77 | up   | 1.08 | down | 2.84  | up   | 1.08 | up   | 12.55 | up   | 2.91 | up   | 4   |
| OsAffx.24612.1.S1_at  | LOC_Os02g37300 | heavy metal associated domain containing protein, expressed                       | 1.57  | down | 1.16 | up   | 2.74  | down | 1.15 | down | 1.04  | down | 1.70 | down | ABA |
| OsAffx.24626.1.S1_at  | LOC_Os02g38120 | BTBN3 - Bric-a-Brac, Tramtrack, Broad Complex BTB domain with non-phototropic hyp | 3.14  | up   | 1.14 | down | 1.98  | up   | 1.50 | down | 1.04  | up   | 1.71 | down | IAA |

|                       |                |                                                                                   |       |      |      |      |        |      |      |      |      |      |      |      |     |
|-----------------------|----------------|-----------------------------------------------------------------------------------|-------|------|------|------|--------|------|------|------|------|------|------|------|-----|
| OsAffx.24626.1.S1_x_a | LOC_Os02g38120 | BTBN3 - Bric-a-Brac, Tramtrack, Broad Complex BTB domain with non-phototropic hyd | 3.05  | up   | 1.10 | down | 1.39   | up   | 1.34 | down | 1.08 | up   | 2.03 | down | 2   |
| OsAffx.24629.1.S1_at  | LOC_Os02g38230 | high affinity nitrate transporter, putative, expressed                            | 1.23  | up   | 1.37 | down | 1.46   | down | 2.46 | down | 1.72 | down | 3.38 | down | 2   |
| OsAffx.24631.1.S1_at  | LOC_Os02g38410 | ubiquitin family protein, putative, expressed                                     | 1.03  | up   | 1.79 | up   | 2.43   | down | 1.05 | down | 1.09 | down | 1.14 | up   | ABA |
| OsAffx.24631.1.S1_s_a | LOC_Os02g38410 | ubiquitin family protein, putative, expressed                                     | 1.07  | up   | 1.75 | up   | 3.07   | down | 1.17 | down | 1.18 | down | 1.15 | down | ABA |
| OsAffx.24657.1.S1_at  | LOC_Os02g40110 | expressed protein                                                                 | 1.00  | up   | 1.12 | down | 2.09   | down | 1.12 | up   | 1.38 | up   | 1.05 | down | ABA |
| OsAffx.24672.1.S1_at  | LOC_Os02g41770 | uncharacterized protein PA4923, putative                                          | 2.46  | up   | 1.21 | down | 1.00   | up   | 1.01 | up   | 1.01 | up   | 1.02 | up   | IAA |
| OsAffx.24682.1.S1_s_a | LOC_Os02g41954 | gibberellin 2-beta-dioxygenase 7, putative, expressed                             | 2.29  | up   | 1.89 | down | 1.01   | up   | 1.02 | up   | 1.02 | up   | 1.00 | down | IAA |
| OsAffx.24694.1.S1_x_a | LOC_Os02g42920 | DTA2, putative, expressed                                                         | 1.08  | down | 1.44 | down | 4.55   | up   | 1.57 | up   | 1.54 | up   | 1.50 | up   | ABA |
| OsAffx.24732.1.S1_x_a | LOC_Os02g44900 | expressed protein                                                                 | 1.15  | down | 1.14 | up   | 2.09   | up   | 1.05 | down | 1.02 | up   | 1.22 | down | ABA |
| OsAffx.24733.1.S1_s_a | LOC_Os02g44940 | RALFL8 - Rapid ALKalinization Factor RALF family protein precursor, expressed     | 1.11  | down | 1.01 | up   | 2.01   | down | 1.03 | down | 1.10 | down | 1.15 | up   | ABA |
| OsAffx.24862.1.S1_at  | LOC_Os02g54240 | OsFBX62 - F-box domain containing protein                                         | 1.48  | down | 1.55 | down | 22.21  | up   | 1.12 | down | 1.16 | down | 1.78 | up   | ABA |
| OsAffx.24890.1.S1_at  | LOC_Os02g56250 | GATA zinc finger domain containing protein, expressed                             | 1.08  | up   | 1.07 | down | 2.42   | down | 1.44 | down | 1.63 | down | 1.05 | up   | ABA |
| OsAffx.24953.1.S1_s_a | LOC_Os03g03370 | fatty acid hydroxylase, putative, expressed                                       | 1.13  | up   | 1.19 | down | 16.93  | up   | 1.17 | up   | 1.82 | up   | 1.63 | up   | ABA |
| OsAffx.24980.1.S1_at  | LOC_Os03g05510 | DUF260 domain containing protein, putative, expressed                             | 13.93 | up   | 1.01 | down | 1.21   | down | 1.03 | up   | 1.05 | down | 1.03 | down | IAA |
| OsAffx.24981.1.S1_at  | LOC_Os03g05530 | nodulin, putative, expressed                                                      | 1.16  | down | 1.02 | down | 15.99  | down | 1.36 | down | 2.80 | down | 1.80 | down | 2   |
| OsAffx.25002.1.S1_at  | LOC_Os03g07120 | expressed protein                                                                 | 1.05  | up   | 1.04 | down | 2.22   | down | 1.17 | down | 1.47 | down | 1.41 | down | ABA |
| OsAffx.25008.1.S1_s_a | LOC_Os03g07510 | expressed protein                                                                 | 11.98 | down | 5.41 | down | 14.19  | down | 2.69 | down | 6.11 | down | 1.45 | down | 5   |
| OsAffx.25011.1.S1_at  | LOC_Os03g07660 | conserved hypothetical protein                                                    | 1.16  | down | 1.19 | down | 2.09   | up   | 1.06 | down | 1.12 | down | 1.12 | down | ABA |
| OsAffx.25038.1.S1_at  | LOC_Os03g10440 | glycosyl hydrolase family 10 protein, putative, expressed                         | 1.15  | down | 2.81 | down | 6.28   | up   | 1.05 | up   | 1.14 | down | 1.34 | down | 2   |
| OsAffx.25045.1.S1_at  | LOC_Os03g10810 | HLS, putative, expressed                                                          | 1.04  | up   | 1.01 | up   | 4.90   | up   | 1.01 | up   | 1.01 | up   | 1.01 | up   | ABA |
| OsAffx.25079.1.S1_at  | LOC_Os03g12940 | OsFBO13 - F-box and other domain containing protein, expressed                    | 1.05  | up   | 1.18 | up   | 2.87   | up   | 1.04 | up   | 1.05 | up   | 1.04 | up   | ABA |
| OsAffx.2509.1.S1_at   | LOC_Os02g04810 | auxin response factor 5, putative, expressed                                      | 1.69  | up   | 1.29 | down | 2.07   | up   | 1.35 | up   | 1.29 | up   | 2.05 | down | 2   |
| OsAffx.25137.1.S1_at  | LOC_Os03g19010 | peroxisomal biogenesis factor 11, putative, expressed                             | 1.36  | up   | 1.19 | up   | 4.44   | up   | 1.50 | up   | 1.59 | up   | 1.52 | up   | ABA |
| OsAffx.25137.1.S1_s_a | LOC_Os03g19010 | peroxisomal biogenesis factor 11, putative, expressed                             | 1.02  | up   | 1.08 | down | 4.16   | up   | 1.48 | up   | 1.69 | up   | 1.81 | up   | ABA |
| OsAffx.25178.1.S1_at  | LOC_Os03g21260 | 2,3-bisphosphoglycerate-independent phosphoglycerate mutase, putative             | 1.23  | down | 1.21 | down | 248.46 | up   | 1.01 | up   | 1.01 | up   | 1.02 | up   | ABA |
| OsAffx.25245.1.S1_at  | LOC_Os03g27110 | hydrolase protein, putative, expressed                                            | 1.01  | down | 1.01 | up   | 39.95  | up   | 1.01 | up   | 1.04 | down | 1.01 | down | ABA |
| OsAffx.2528.1.S1_at   | LOC_Os02g06950 | no apical meristem protein, putative                                              | 1.01  | down | 1.00 | up   | 2.21   | up   | 1.01 | up   | 1.00 | up   | 1.02 | up   | ABA |
| OsAffx.25290.1.S1_at  | LOC_Os03g29960 | DEK C terminal domain containing protein, expressed                               | 1.10  | down | 1.11 | down | 3.05   | up   | 1.10 | down | 1.10 | up   | 1.07 | up   | ABA |
| OsAffx.2537.1.S1_at   | LOC_Os02g07440 | DEFL78 - Defensin and Defensin-like DEFL family                                   | 1.17  | down | 1.22 | up   | 4.42   | down | 1.70 | down | 2.20 | down | 3.50 | down | 3   |
| OsAffx.25443.1.S1_at  | LOC_Os03g39980 | expressed protein                                                                 | 32.65 | up   | 1.00 | down | 1.07   | up   | 1.00 | up   | 1.01 | up   | 1.02 | up   | IAA |
| OsAffx.25463.1.S1_at  | LOC_Os03g41100 | cyclin, putative, expressed                                                       | 1.27  | down | 1.24 | down | 3.10   | down | 1.05 | up   | 2.13 | down | 1.02 | down | 2   |
| OsAffx.25498.1.S1_at  | LOC_Os03g42710 | WD-40 repeat family protein, putative, expressed                                  | 1.01  | down | 1.00 | up   | 23.58  | up   | 1.01 | down | 1.06 | down | 1.19 | up   | ABA |
| OsAffx.25512.1.S1_s_a | LOC_Os03g43400 | OsiIAA11 - Auxin-responsive Aux/IAA gene family member, expressed                 | 3.61  | up   | 1.52 | up   | 6.62   | down | 1.54 | down | 2.32 | down | 1.97 | down | 4   |
| OsAffx.25512.1.S1_x_a | LOC_Os03g43400 | OsiIAA11 - Auxin-responsive Aux/IAA gene family member, expressed                 | 2.94  | up   | 1.48 | up   | 2.64   | down | 1.23 | down | 1.40 | down | 1.29 | down | 2   |
| OsAffx.25668.1.S1_at  | LOC_Os03g50780 | PHD-finger domain containing protein, putative, expressed                         | 1.01  | down | 1.11 | down | 2.22   | up   | 1.19 | up   | 1.06 | up   | 1.00 | up   | ABA |
| OsAffx.25749.1.S1_at  | LOC_Os03g57880 | glucan endo-1,3-beta-glucosidase precursor, putative, expressed                   | 1.06  | up   | 1.12 | up   | 5.07   | up   | 1.14 | down | 1.06 | up   | 1.09 | up   | ABA |
| OsAffx.25749.1.S1_s_a | LOC_Os03g57880 | glucan endo-1,3-beta-glucosidase precursor, putative, expressed                   | 1.02  | up   | 1.07 | up   | 5.25   | up   | 1.41 | down | 1.25 | up   | 1.21 | down | ABA |
| OsAffx.25751.1.S1_at  | LOC_Os03g57980 | LTPL99 - Protease inhibitor/seed storage/LTP family protein precursor, expressed  | 1.36  | up   | 1.98 | up   | 10.53  | up   | 1.99 | down | 1.38 | up   | 2.19 | down | 4   |
| OsAffx.25751.1.S1_s_a | LOC_Os03g57980 | LTPL99 - Protease inhibitor/seed storage/LTP family protein precursor, expressed  | 1.16  | up   | 1.53 | up   | 10.09  | up   | 1.38 | down | 1.64 | up   | 1.43 | down | ABA |
| OsAffx.25760.1.S1_at  | LOC_Os03g58800 | ATPase, putative, expressed                                                       | 1.94  | up   | 1.03 | down | 2.23   | down | 1.13 | down | 2.18 | up   | 1.58 | up   | 2   |
| OsAffx.25760.1.S1_x_a | LOC_Os03g58800 | ATPase, putative, expressed                                                       | 1.63  | up   | 1.02 | down | 2.26   | down | 1.09 | down | 2.14 | up   | 1.80 | up   | 2   |
| OsAffx.25764.1.S1_at  | LOC_Os03g59110 | pheophorbide a oxygenase, chloroplast precursor, putative, expressed              | 1.02  | down | 1.00 | up   | 16.91  | up   | 1.00 | down | 1.01 | up   | 1.09 | up   | ABA |
| OsAffx.25767.1.S1_s_a | LOC_Os03g59380 | LTPL28 - Protease inhibitor/seed storage/LTP family protein precursor, expressed  | 1.36  | down | 1.06 | up   | 2.03   | up   | 1.12 | up   | 1.33 | up   | 1.00 | up   | ABA |
| OsAffx.25809.1.S1_at  | LOC_Os03g63580 | phosphoesterase family protein, putative, expressed                               | 1.01  | down | 1.00 | up   | 20.33  | up   | 1.00 | up   | 1.00 | down | 1.01 | up   | ABA |
| OsAffx.25809.1.S1_x_a | LOC_Os03g63580 | phosphoesterase family protein, putative, expressed                               | 1.03  | down | 1.02 | down | 19.97  | up   | 1.01 | down | 1.38 | up   | 1.01 | up   | ABA |
| OsAffx.25830.1.S1_at  | LOC_Os04g01980 | receptor protein kinase, putative, expressed                                      | 1.06  | down | 1.00 | up   | 1.84   | down | 1.10 | up   | 1.02 | up   | 2.56 | up   | JA  |
| OsAffx.25840.1.S1_at  | LOC_Os04g02560 | expressed protein                                                                 | 4.48  | up   | 1.42 | up   | 1.28   | down | 1.10 | up   | 1.18 | up   | 1.11 | down | IAA |
| OsAffx.25891.1.S1_at  | LOC_Os04g06590 | expressed protein                                                                 | 1.27  | up   | 1.17 | up   | 1.06   | up   | 1.08 | up   | 6.23 | up   | 1.27 | up   | SA  |
| OsAffx.2594.1.S1_at   | LOC_Os02g13300 | mitochondrial carrier protein, putative, expressed                                | 1.31  | up   | 1.02 | up   | 5.41   | up   | 1.14 | down | 1.94 | up   | 1.33 | up   | ABA |
| OsAffx.25959.2.S1_at  | LOC_Os04g10460 | amidase, putative, expressed                                                      | 1.19  | down | 1.19 | down | 2.19   | down | 1.61 | down | 1.14 | down | 1.77 | up   | ABA |
| OsAffx.25975.1.S1_at  | LOC_Os04g11040 | expressed protein                                                                 | 1.11  | down | 1.05 | up   | 7.24   | down | 1.41 | down | 5.39 | down | 6.10 | down | 3   |
| OsAffx.25978.1.S1_at  | LOC_Os04g11120 | expressed protein                                                                 | 1.42  | down | 1.08 | down | 8.74   | down | 1.53 | down | 1.90 | down | 2.55 | down | 2   |
| OsAffx.26050.5.S1_at  | LOC_Os08g18974 | expressed protein                                                                 | 1.00  | down | 1.34 | up   | 23.20  | up   | 1.06 | up   | 1.02 | down | 1.10 | up   | ABA |
| OsAffx.26103.1.S1_at  | LOC_Os04g20070 | tropinone reductase 2, putative, expressed                                        | 1.43  | up   | 1.07 | up   | 4.50   | up   | 1.06 | up   | 1.04 | up   | 1.09 | up   | ABA |
| OsAffx.26111.1.S1_at  | LOC_Os02g14910 | bZIP transcription factor family protein, putative, expressed                     | 1.13  | down | 1.16 | up   | 2.45   | down | 1.22 | down | 1.32 | down | 1.46 | down | ABA |



|                       |                |                                                                                   |       |      |      |      |        |      |      |      |       |      |      |      |     |
|-----------------------|----------------|-----------------------------------------------------------------------------------|-------|------|------|------|--------|------|------|------|-------|------|------|------|-----|
| OsAffx.2612.1.S1_at   | LOC_Os02g14980 | calcium-binding EF hand family protein, putative, expressed                       | 1.08  | down | 1.25 | down | 15.83  | up   | 1.15 | up   | 1.05  | up   | 2.05 | up   | 2   |
| OsAffx.26128.1.S1_at  | LOC_Os04g24340 | phytase, putative                                                                 | 1.68  | down | 1.97 | up   | 2.13   | down | 1.57 | down | 2.28  | down | 2.37 | up   | 4   |
| OsAffx.2622.1.S1_at   | LOC_Os02g15440 | hypothetical protein                                                              | 1.25  | up   | 3.26 | down | 3.09   | up   | 1.20 | down | 2.14  | up   | 1.74 | down | 3   |
| OsAffx.26295.2.S1_at  | LOC_Os04g32830 | expressed protein                                                                 | 1.73  | down | 1.54 | down | 6.41   | down | 1.21 | up   | 2.08  | down | 3.64 | down | 3   |
| OsAffx.26304.1.S1_x_a | LOC_Os04g33310 | expressed protein                                                                 | 1.09  | down | 1.37 | down | 3.19   | down | 1.08 | up   | 1.56  | down | 1.06 | up   | ABA |
| OsAffx.26317.1.S2_at  | LOC_Os04g33920 | LTPL102 - Protease inhibitor/seed storage/LTP family protein precursor, expressed | 1.51  | down | 1.63 | down | 68.61  | up   | 1.28 | down | 1.36  | up   | 1.23 | down | ABA |
| OsAffx.26343.1.S1_x_a | LOC_Os04g35490 | expressed protein                                                                 | 1.01  | down | 1.00 | up   | 68.38  | up   | 1.00 | up   | 1.00  | down | 1.05 | up   | ABA |
| OsAffx.26385.1.S1_at  | LOC_Os04g39170 | expressed protein                                                                 | 1.06  | up   | 1.03 | down | 6.60   | up   | 1.02 | down | 1.20  | up   | 1.01 | up   | ABA |
| OsAffx.26423.1.S1_at  | LOC_Os04g41970 | endoglucanase, putative, expressed                                                | 1.80  | down | 1.21 | down | 3.98   | down | 1.09 | down | 1.64  | down | 2.81 | up   | 2   |
| OsAffx.26451.1.S1_at  | LOC_Os04g44130 | DEF12 - Defensin and Defensin-like DEFL family, expressed                         | 1.28  | down | 2.78 | down | 1.06   | down | 1.02 | down | 1.66  | down | 1.37 | down | BAP |
| OsAffx.26497.1.S1_at  | LOC_Os04g47170 | ATROPGEF7/ROPGEF7, putative, expressed                                            | 1.30  | up   | 1.11 | up   | 2.67   | up   | 1.20 | down | 1.13  | up   | 1.13 | up   | ABA |
| OsAffx.26509.1.S1_s_a | LOC_Os04g47770 | cis-zeatin O-glucosyltransferase, putative, expressed                             | 1.19  | up   | 1.09 | up   | 2.69   | down | 1.42 | up   | 1.21  | down | 1.21 | down | ABA |
| OsAffx.26540.1.S1_s_a | LOC_Os04g49550 | RING-H2 finger protein ATL2A, putative, expressed                                 | 1.00  | down | 1.69 | up   | 1.47   | up   | 1.23 | up   | 1.13  | down | 2.65 | up   | JA  |
| OsAffx.26601.1.S1_x_a | LOC_Os04g54500 | POLGAMMA2, putative, expressed                                                    | 1.35  | up   | 1.15 | up   | 2.50   | down | 1.10 | down | 1.38  | down | 1.08 | down | ABA |
| OsAffx.26635.1.S1_at  | LOC_Os04g56570 | heavy metal-associated domain containing protein, expressed                       | 1.03  | down | 1.02 | down | 18.65  | up   | 1.05 | down | 1.05  | down | 1.08 | up   | ABA |
| OsAffx.26636.1.S1_x_a | LOC_Os04g56580 | inositol 1,3,4,5,6-pentakisphosphate 2-kinase, putative, expressed                | 1.20  | up   | 1.05 | up   | 4.01   | up   | 1.22 | up   | 1.23  | up   | 1.05 | up   | ABA |
| OsAffx.26728.1.S1_at  | LOC_Os05g04470 | peroxidase precursor, putative, expressed                                         | 1.80  | down | 1.82 | down | 8.10   | down | 1.60 | down | 2.72  | down | 1.98 | down | 3   |
| OsAffx.26738.1.S1_at  | LOC_Os05g05040 | expressed protein                                                                 | 1.00  | down | 1.08 | up   | 2.02   | down | 2.26 | down | 1.39  | down | 1.27 | up   | 2   |
| OsAffx.26801.1.S1_x_a | LOC_Os05g09480 | OslAA16 - Auxin-responsive Aux/IAA gene family member, expressed                  | 2.35  | down | 1.32 | up   | 6.67   | down | 1.38 | up   | 2.03  | down | 3.02 | up   | 3   |
| OsAffx.26826.1.S1_at  | LOC_Os05g11210 | lachrymatory factor synthase, putative, expressed                                 | 1.87  | up   | 5.46 | up   | 26.76  | down | 1.24 | up   | 2.42  | down | 2.23 | down | 4   |
| OsAffx.26937.3.S1_at  | LOC_Os05g16930 | protein kinase domain containing protein, expressed                               | 1.24  | down | 2.91 | down | 9.47   | down | 1.04 | down | 2.34  | up   | 1.05 | down | 3   |
| OsAffx.26937.4.S1_x_a | LOC_Os05g17810 | SHR5-receptor-like kinase, putative                                               | 1.28  | down | 1.02 | up   | 5.70   | down | 1.11 | up   | 1.02  | up   | 1.89 | up   | ABA |
| OsAffx.26991.1.S1_at  | LOC_Os05g23924 | glycosyl hydrolase family 10 protein, putative, expressed                         | 1.22  | up   | 1.12 | down | 2.98   | up   | 2.70 | down | 1.94  | down | 2.09 | down | 3   |
| OsAffx.27033.1.S1_at  | LOC_Os05g26940 | CAMK_KIN1/SNF1/Nim1_like.23 - CAMK includes calcium/calmodulin dependent protein  | 2.09  | down | 1.18 | up   | 3.79   | up   | 1.11 | down | 1.33  | up   | 1.34 | up   | 2   |
| OsAffx.27033.2.S1_s_a | LOC_Os05g26940 | CAMK_KIN1/SNF1/Nim1_like.23 - CAMK includes calcium/calmodulin dependent protein  | 1.16  | up   | 1.36 | up   | 3.51   | up   | 1.13 | down | 1.11  | up   | 1.24 | up   | ABA |
| OsAffx.2707.1.S1_at   | LOC_Os05g21300 | transposon protein, putative, unclassified, expressed                             | 10.69 | up   | 1.77 | up   | 15.75  | up   | 3.60 | up   | 19.12 | up   | 1.95 | up   | 4   |
| OsAffx.27091.1.S1_at  | LOC_Os05g30820 | protein kinase, putative, expressed                                               | 1.06  | up   | 1.28 | down | 6.24   | down | 1.08 | down | 1.11  | down | 1.05 | up   | ABA |
| OsAffx.27219.1.S1_at  | LOC_Os05g38290 | protein phosphatase 2C, putative, expressed                                       | 2.51  | up   | 1.58 | down | 73.05  | up   | 1.88 | down | 2.83  | up   | 1.94 | up   | 3   |
| OsAffx.27222.1.S1_at  | LOC_Os05g38350 | glycerol-3-phosphate acyltransferase 8, putative, expressed                       | 1.25  | up   | 1.23 | down | 5.64   | up   | 1.11 | up   | 1.44  | up   | 1.04 | down | ABA |
| OsAffx.27222.1.S1_x_a | LOC_Os05g38350 | glycerol-3-phosphate acyltransferase 8, putative, expressed                       | 1.28  | up   | 1.12 | down | 5.68   | up   | 1.16 | up   | 1.55  | up   | 1.15 | up   | ABA |
| OsAffx.27244.1.S1_x_a | LOC_Os05g39850 | MCM3 - Putative minichromosome maintenance MCM complex subunit 3, expressed       | 1.31  | down | 1.18 | down | 5.64   | down | 1.08 | down | 2.85  | down | 1.84 | down | 2   |
| OsAffx.27267.1.S1_at  | LOC_Os05g40960 | Myb transcription factor, putative, expressed                                     | 1.23  | down | 1.08 | up   | 17.09  | down | 1.64 | down | 1.03  | down | 1.25 | up   | ABA |
| OsAffx.27278.1.S1_x_a | LOC_Os05g41760 | AP2 domain containing protein, expressed                                          | 3.02  | up   | 1.01 | up   | 1.77   | up   | 1.07 | down | 1.78  | up   | 1.35 | up   | IAA |
| OsAffx.27281.1.S1_at  | AK240824       | UDP-glucuronosyl/UDP-glucosyl transferase family protein                          | 1.18  | up   | 1.07 | down | 4.45   | up   | 1.57 | down | 2.33  | down | 1.07 | up   | 2   |
| OsAffx.27319.2.S1_s_a | LOC_Os05g45380 | hypothetical protein                                                              | 1.08  | down | 3.11 | down | 1.04   | down | 1.01 | down | 1.02  | down | 1.00 | up   | BAP |
| OsAffx.27322.1.S1_s_a | LOC_Os05g45480 | POEI45 - Pollen Ole e l allergen and extensin family protein precursor, expressed | 1.85  | down | 2.00 | down | 3.30   | down | 1.73 | down | 1.97  | down | 2.01 | down | 4   |
| OsAffx.27338.1.S1_s_a | LOC_Os05g46395 | expressed protein                                                                 | 1.19  | down | 1.19 | down | 2.92   | up   | 1.01 | up   | 1.31  | up   | 1.01 | down | ABA |
| OsAffx.27339.1.S1_s_a | LOC_Os05g47830 | expressed protein                                                                 | 1.14  | down | 1.31 | up   | 17.26  | up   | 1.01 | up   | 1.06  | down | 1.06 | down | ABA |
| OsAffx.27360.1.S1_s_a | LOC_Os05g48570 | expressed protein                                                                 | 1.15  | down | 1.06 | down | 3.86   | up   | 1.30 | up   | 1.25  | up   | 1.03 | down | ABA |
| OsAffx.27370.1.S1_at  | LOC_Os05g50940 | conserved hypothetical protein                                                    | 1.74  | up   | 2.77 | up   | 1.11   | down | 1.48 | down | 1.11  | down | 1.22 | down | BAP |
| OsAffx.27398.1.S1_at  | LOC_Os06g05000 | early nodulin 93 ENOD93 protein, putative, expressed                              | 1.00  | up   | 1.01 | up   | 3.81   | up   | 1.00 | up   | 1.00  | down | 1.01 | up   | ABA |
| OsAffx.27459.2.S1_s_a | LOC_Os06g05010 | early nodulin 93 ENOD93 protein, putative, expressed                              | 1.30  | down | 1.36 | up   | 3.22   | up   | 1.24 | up   | 3.02  | up   | 1.35 | down | 2   |
| OsAffx.27459.3.S1_at  | LOC_Os06g05010 | early nodulin 93 ENOD93 protein, putative, expressed                              | 2.05  | down | 1.05 | up   | 2.74   | down | 1.06 | down | 2.76  | up   | 3.75 | down | 4   |
| OsAffx.27459.3.S1_x_a | LOC_Os09g39730 | Core histone H2A                                                                  | 2.38  | down | 1.10 | up   | 2.31   | down | 1.22 | up   | 3.17  | up   | 2.74 | down | 4   |
| OsAffx.27508.10.S1_s  | LOC_Os10g36924 | aquaporin protein, putative, expressed                                            | 1.28  | up   | 1.03 | down | 198.87 | up   | 1.38 | up   | 1.01  | up   | 1.02 | up   | ABA |
| OsAffx.27508.100.S1_s | LOC_Os07g38380 | transmembrane protein 49, putative, expressed                                     | 1.42  | down | 1.90 | down | 2.43   | down | 1.21 | up   | 1.51  | up   | 1.20 | up   | ABA |
| OsAffx.27508.54.S1_s  | LOC_Os07g38380 | transmembrane protein 49, putative, expressed                                     | 1.05  | up   | 1.06 | down | 3.13   | up   | 1.02 | up   | 1.10  | up   | 1.07 | down | ABA |
| OsAffx.27513.1.S1_s_a | LOC_Os06g08640 | transferase family protein, putative, expressed                                   | 1.30  | down | 1.47 | down | 3.81   | down | 1.16 | up   | 1.13  | down | 2.45 | up   | 2   |
| OsAffx.27525.1.S1_at  | LOC_Os06g09340 | pectinesterase, putative, expressed                                               | 1.12  | up   | 1.05 | down | 2.89   | down | 1.07 | up   | 1.43  | down | 1.00 | down | ABA |
| OsAffx.27555.1.S1_at  | LOC_Os06g10580 | cyclic nucleotide-gated ion channel, putative, expressed                          | 1.01  | down | 1.00 | up   | 2.08   | down | 1.48 | up   | 1.14  | up   | 1.01 | up   | ABA |
| OsAffx.27557.1.S1_at  | 9630           | ---                                                                               | 7.14  | up   | 1.00 | up   | 1.53   | up   | 1.00 | up   | 1.01  | down | 1.11 | down | IAA |
| OsAffx.2760.1.S1_at   | LOC_Os02g26470 | expressed protein                                                                 | 1.01  | down | 1.04 | up   | 241.16 | up   | 1.11 | down | 1.07  | down | 1.10 | down | ABA |
| OsAffx.27605.1.S1_s_a | LOC_Os06g13190 | expressed protein                                                                 | 1.60  | up   | 1.01 | down | 1.07   | up   | 1.17 | down | 3.15  | up   | 1.05 | down | SA  |
| OsAffx.27608.1.S1_at  | LOC_Os06g13280 | O-methyltransferase, putative                                                     | 1.89  | up   | 1.22 | up   | 4.60   | up   | 1.11 | up   | 1.90  | up   | 2.50 | up   | 2   |
| OsAffx.27633.1.S1_at  | LOC_Os06g14280 | cysteine-rich repeat secretory protein precursor, putative, expressed             | 1.32  | down | 1.06 | down | 2.13   | down | 1.43 | down | 1.59  | down | 1.47 | down | ABA |

|                       |                |                                                                                    |       |      |      |      |       |      |      |      |       |      |      |      |     |
|-----------------------|----------------|------------------------------------------------------------------------------------|-------|------|------|------|-------|------|------|------|-------|------|------|------|-----|
| OsAffx.27652.1.S1_x_a | LOC_Os06g15620 | GASR7 - Gibberellin-regulated GASA                                                 | 1.91  | up   | 1.10 | up   | 7.54  | down | 1.24 | up   | 1.09  | down | 1.47 | down | ABA |
| OsAffx.27660.1.S1_at  | LOC_Os06g15910 | potassium transporter, putative, expressed                                         | 1.22  | up   | 1.19 | down | 3.54  | up   | 1.35 | down | 1.44  | up   | 1.07 | down | ABA |
| OsAffx.27693.1.S1_at  | LOC_Os06g18850 | cadmium tolerance factor, putative, expressed                                      | 1.07  | up   | 1.28 | up   | 8.03  | down | 1.48 | up   | 1.73  | down | 1.67 | down | ABA |
| OsAffx.27718.1.S1_at  | LOC_Os06g19740 | expressed protein                                                                  | 2.04  | down | 2.44 | up   | 1.29  | down | 1.00 | up   | 1.20  | down | 1.57 | up   | 2   |
| OsAffx.27815.1.S1_s_a | LOC_Os06g24990 | xylanase inhibitor protein 1 precursor, putative, expressed                        | 1.07  | down | 1.30 | up   | 2.68  | up   | 1.29 | down | 1.95  | up   | 1.27 | up   | ABA |
| OsAffx.27905.1.S1_at  | LOC_Os06g32730 | eukaryotic initiation factor iso-4F subunit p82-34, putative, expressed            | 1.02  | up   | 1.12 | down | 2.29  | up   | 1.03 | up   | 1.13  | down | 1.46 | down | ABA |
| OsAffx.27946.1.S1_at  | LOC_Os06g35060 | heavy metal-associated domain containing protein, expressed                        | 1.55  | up   | 1.28 | up   | 4.90  | down | 1.86 | up   | 1.51  | down | 3.53 | down | 2   |
| OsAffx.27959.1.S1_x_a | LOC_Os06g36080 | kinesin motor domain containing protein, expressed                                 | 1.14  | up   | 1.21 | down | 2.15  | up   | 1.30 | up   | 1.51  | up   | 1.99 | up   | ABA |
| OsAffx.28017.1.S1_at  | LOC_Os06g39960 | bZIP transcription factor domain containing protein, expressed                     | 1.16  | up   | 1.23 | down | 4.61  | down | 1.63 | up   | 1.80  | up   | 2.65 | up   | 2   |
| OsAffx.28093.1.S1_at  | LOC_Os06g44040 | DOMON domain containing protein, expressed                                         | 1.35  | up   | 1.13 | down | 3.28  | up   | 1.23 | down | 1.38  | up   | 1.36 | up   | ABA |
| OsAffx.28099.1.S1_at  | LOC_Os06g44410 | histidine kinase, putative, expressed                                              | 1.15  | down | 2.46 | down | 4.33  | down | 1.17 | down | 1.37  | down | 1.22 | down | 2   |
| OsAffx.28152.1.S1_s_a | LOC_Os06g47530 | TKL_IRAK_DUF26-lh.6 - DUF26 kinases have homology to DUF26 containing loci, exp    | 1.51  | up   | 1.30 | down | 1.54  | up   | 1.18 | up   | 2.00  | up   | 1.10 | up   | SA  |
| OsAffx.28161.1.S1_at  | LOC_Os06g47850 | zinc finger family protein, putative, expressed                                    | 8.39  | up   | 1.34 | up   | 3.49  | up   | 1.36 | up   | 17.53 | up   | 2.56 | up   | 4   |
| OsAffx.28164.1.S1_at  | LOC_Os06g48030 | peroxidase precursor, putative, expressed                                          | 1.05  | up   | 1.82 | up   | 4.58  | up   | 1.25 | up   | 1.11  | up   | 1.51 | down | ABA |
| OsAffx.28187.1.S1_s_a | LOC_Os06g49390 | NBS-LRR disease resistance protein, putative, expressed                            | 1.29  | down | 1.19 | up   | 3.18  | down | 1.37 | up   | 1.86  | down | 1.22 | down | ABA |
| OsAffx.28203.1.S1_at  | LOC_Os06g50990 | conserved hypothetical protein                                                     | 2.42  | up   | 1.00 | up   | 1.02  | down | 1.02 | down | 1.01  | down | 1.10 | up   | IAA |
| OsAffx.28211.1.S1_at  | LOC_Os06g51360 | lysM domain containing protein, putative, expressed                                | 1.12  | up   | 1.09 | up   | 2.13  | up   | 1.17 | up   | 1.07  | up   | 1.66 | up   | ABA |
| OsAffx.2825.1.S1_x_at | LOC_Os02g32140 | AP2 domain containing protein, expressed                                           | 1.12  | down | 1.73 | up   | 6.91  | up   | 1.53 | up   | 2.72  | up   | 1.51 | up   | 2   |
| OsAffx.28258.1.S1_at  | LOC_Os07g04220 | wound and phytochrome signaling involved receptor like kinase, putative, expressed | 1.07  | down | 1.25 | down | 2.87  | up   | 1.13 | up   | 1.68  | up   | 1.16 | up   | ABA |
| OsAffx.28335.1.S1_at  | LOC_Os07g07790 | LTPL75 - Protease inhibitor/seed storage/LTP family protein precursor, expressed   | 2.34  | up   | 1.53 | up   | 4.97  | up   | 1.03 | up   | 1.33  | up   | 2.23 | down | 3   |
| OsAffx.28337.1.S1_at  | LOC_Os07g07860 | LTPL76 - Protease inhibitor/seed storage/LTP family protein precursor, expressed   | 1.83  | up   | 1.04 | up   | 6.42  | up   | 1.04 | down | 1.35  | up   | 1.19 | down | ABA |
| OsAffx.28364.1.S1_at  | LOC_Os07g09520 | expressed protein                                                                  | 1.11  | down | 1.09 | down | 8.40  | down | 1.31 | down | 1.50  | down | 1.28 | up   | ABA |
| OsAffx.28364.1.S1_x_a | LOC_Os07g09520 | expressed protein                                                                  | 1.27  | down | 1.45 | down | 5.97  | down | 1.14 | down | 1.69  | down | 1.25 | up   | ABA |
| OsAffx.28379.1.S1_at  | LOC_Os07g10230 | glucosyltransferase, putative, expressed                                           | 1.16  | down | 6.26 | up   | 1.07  | down | 1.05 | down | 1.05  | down | 1.01 | down | BAP |
| OsAffx.28454.1.S1_s_a | LOC_Os07g15130 | hypothetical protein                                                               | 1.02  | down | 1.06 | up   | 8.06  | down | 1.15 | down | 1.59  | down | 1.57 | down | ABA |
| OsAffx.28664.1.S1_at  | LOC_Os07g29810 | disease resistant protein, identical, putative, expressed                          | 2.09  | up   | 1.05 | down | 1.01  | down | 1.00 | up   | 1.03  | down | 1.01 | up   | IAA |
| OsAffx.28670.1.S1_s_a | LOC_Os07g30150 | phosphoribosyl transferase, putative, expressed                                    | 1.35  | down | 3.75 | up   | 6.08  | down | 2.22 | up   | 1.70  | down | 1.11 | up   | 3   |
| OsAffx.28717.1.S1_at  | LOC_Os07g32660 | monocopper oxidase, putative, expressed                                            | 1.09  | down | 1.43 | down | 2.37  | down | 1.06 | down | 1.77  | down | 2.15 | up   | 2   |
| OsAffx.28727.1.S1_at  | LOC_Os07g33320 | expressed protein                                                                  | 2.20  | up   | 2.67 | down | 3.69  | up   | 1.45 | down | 3.65  | up   | 4.55 | down | 5   |
| OsAffx.2874.1.S1_at   | LOC_Os02g35870 | galactosyltransferase, putative, expressed                                         | 1.24  | up   | 1.13 | down | 2.51  | up   | 1.46 | down | 1.30  | down | 1.01 | up   | ABA |
| OsAffx.28754.2.S1_at  | AK241373       | receptor-like protein kinase 4, putative                                           | 1.00  | up   | 1.22 | down | 2.79  | up   | 1.26 | down | 1.06  | up   | 1.27 | down | ABA |
| OsAffx.28857.1.S1_at  | LOC_Os07g41320 | COBRA-like protein precursor, putative, expressed                                  | 1.03  | up   | 1.18 | up   | 1.29  | down | 1.29 | down | 2.48  | down | 1.35 | down | SA  |
| OsAffx.28867.2.S1_at  | LOC_Os07g42070 | DC1 domain-containing protein, putative, expressed                                 | 17.36 | down | 1.22 | down | 29.83 | down | 1.71 | up   | 7.18  | down | 7.70 | down | 4   |
| OsAffx.28880.1.S1_s_a | LOC_Os07g42910 | cytochrome c oxidase subunit, putative, expressed                                  | 1.09  | down | 1.02 | down | 5.38  | up   | 1.32 | up   | 1.07  | up   | 1.38 | up   | ABA |
| OsAffx.28888.1.S1_x_a | LOC_Os07g43450 | conserved hypothetical protein                                                     | 1.15  | down | 1.02 | up   | 3.68  | up   | 1.11 | up   | 1.02  | up   | 1.04 | up   | ABA |
| OsAffx.28901.3.S1_at  | LOC_Os03g52880 | BTBN9 - Bric-a-Brac, Tramtrack, Broad Complex BTB domain with non-phototropic hyp  | 1.02  | up   | 1.08 | up   | 2.18  | down | 1.07 | up   | 1.05  | down | 1.17 | down | ABA |
| OsAffx.28906.1.S1_x_a | LOC_Os07g44850 | gibberellin receptor GID1L2, putative, expressed                                   | 1.00  | down | 1.00 | down | 5.37  | up   | 1.01 | up   | 1.05  | up   | 1.04 | up   | ABA |
| OsAffx.28929.1.S1_at  | LOC_Os07g46220 | SNARE associated Golgi protein, putative, expressed                                | 1.06  | up   | 1.04 | down | 3.66  | up   | 1.05 | down | 1.04  | down | 1.08 | up   | ABA |
| OsAffx.28948.1.S1_at  | LOC_Os07g47960 | basic helix-loop-helix domain containing protein, expressed                        | 1.04  | up   | 1.03 | up   | 1.61  | up   | 2.69 | down | 2.49  | down | 2.59 | down | 3   |
| OsAffx.28967.1.S1_x_a | LOC_Os07g08500 | C-5 cytosine-specific DNA methylase, putative, expressed                           | 1.18  | down | 1.18 | down | 6.75  | down | 1.03 | down | 2.90  | down | 2.00 | down | 3   |
| OsAffx.2905.1.S1_at   | LOC_Os02g38320 | BTBZ3 - Bric-a-Brac, Tramtrack, Broad Complex BTB domain with TAZ zinc finger and  | 1.17  | down | 1.06 | down | 1.45  | up   | 1.03 | down | 1.06  | up   | 5.32 | up   | JA  |
| OsAffx.29101.1.S1_at  | LOC_Os08g08440 | hypothetical protein                                                               | 1.17  | down | 1.02 | up   | 2.85  | up   | 1.00 | down | 1.34  | up   | 1.00 | up   | ABA |
| OsAffx.29133.1.S1_x_a | LOC_Os08g10330 | SHR5-receptor-like kinase, putative, expressed                                     | 1.03  | down | 1.30 | down | 3.59  | down | 1.18 | down | 1.55  | up   | 1.62 | down | ABA |
| OsAffx.2917.1.S1_at   | LOC_Os02g39620 | ATOZ11, putative, expressed                                                        | 6.02  | down | 1.39 | down | 1.61  | down | 1.19 | up   | 1.08  | down | 1.91 | down | IAA |
| OsAffx.2917.1.S1_s_at | LOC_Os02g39620 | ATOZ11, putative, expressed                                                        | 3.09  | down | 1.18 | up   | 2.47  | down | 1.01 | down | 1.39  | down | 3.48 | down | 3   |
| OsAffx.29230.1.S1_at  | LOC_Os08g16030 | expressed protein                                                                  | 1.10  | up   | 1.08 | down | 2.78  | down | 1.20 | up   | 1.06  | up   | 1.63 | up   | ABA |
| OsAffx.29241.1.S1_s_a | LOC_Os08g16820 | retrotransposon protein, putative, SINE subclass, expressed                        | 2.68  | up   | 1.38 | up   | 2.33  | down | 2.01 | down | 1.53  | down | 1.42 | down | 3   |
| OsAffx.2928.1.S1_at   | LOC_Os02g40500 | OsGrx_C2.1 - glutaredoxin subgroup I, expressed                                    | 5.05  | up   | 1.12 | down | 5.80  | up   | 1.31 | up   | 11.42 | up   | 5.07 | up   | 4   |
| OsAffx.29286.1.S1_at  | LOC_Os08g20200 | male sterility protein, putative, expressed                                        | 1.00  | up   | 1.01 | down | 33.36 | up   | 1.14 | up   | 1.21  | up   | 1.16 | up   | ABA |
| OsAffx.29494.1.S1_at  | LOC_Os08g33670 | no apical meristem protein, putative, expressed                                    | 1.00  | down | 1.01 | down | 23.41 | up   | 1.00 | up   | 1.00  | down | 1.03 | up   | ABA |
| OsAffx.2952.1.S1_at   | LOC_Os02g43912 | ceramide kinase-related, putative                                                  | 1.22  | up   | 1.01 | up   | 3.41  | up   | 1.28 | up   | 1.41  | up   | 1.15 | up   | ABA |
| OsAffx.29543.1.S1_x_a | LOC_Os08g35860 | cytokinin dehydrogenase precursor, putative, expressed                             | 1.43  | up   | 1.92 | up   | 4.64  | up   | 1.45 | up   | 1.04  | up   | 1.14 | down | ABA |
| OsAffx.29557.1.S1_at  | 9636           | ---                                                                                | 1.01  | down | 1.10 | up   | 2.99  | up   | 1.04 | up   | 1.05  | up   | 1.10 | up   | ABA |
| OsAffx.29571.1.S1_at  | LOC_Os08g37432 | MATE efflux family protein, putative, expressed                                    | 1.21  | up   | 1.49 | up   | 1.45  | down | 1.52 | up   | 3.50  | up   | 2.50 | up   | 2   |
| OsAffx.29578.1.S1_at  | LOC_Os08g37970 | MYB family transcription factor, putative, expressed                               | 2.60  | up   | 1.07 | down | 1.01  | down | 1.05 | down | 1.00  | down | 1.00 | down | IAA |

|                       |                |                                                                                             |       |      |      |      |        |      |      |      |       |      |      |      |     |
|-----------------------|----------------|---------------------------------------------------------------------------------------------|-------|------|------|------|--------|------|------|------|-------|------|------|------|-----|
| OsAffx.29599.2.S1_at  | LOC_Os04g42820 | hypothetical protein                                                                        | 1.00  | down | 1.00 | up   | 6.43   | up   | 1.00 | up   | 1.00  | up   | 1.01 | up   | ABA |
| OsAffx.29627.2.S1_at  | LOC_Os08g41820 | exo70 exocyst complex subunit domain containing protein, expressed                          | 1.44  | down | 1.82 | up   | 4.78   | down | 1.88 | up   | 1.18  | down | 1.00 | down | ABA |
| OsAffx.29632.1.S1_at  | LOC_Os08g42390 | glycerophosphoryl diester phosphodiesterase family protein, putative, expressed             | 1.01  | down | 1.03 | down | 2.63   | down | 1.31 | up   | 1.13  | up   | 1.60 | up   | ABA |
| OsAffx.29650.1.S1_at  | LOC_Os08g43760 | carrier, putative, expressed                                                                | 5.64  | up   | 1.01 | up   | 2.45   | up   | 1.00 | down | 1.00  | down | 1.01 | down | 2   |
| OsAffx.2974.1.S1_s_at | LOC_Os02g45890 | sulfotransferase domain containing protein, expressed                                       | 10.18 | down | 2.30 | up   | 61.91  | down | 1.15 | down | 20.91 | down | 2.77 | down | 5   |
| OsAffx.29871.1.S1_x_a | LOC_Os09g16330 | pleiotropic drug resistance protein, putative, expressed                                    | 3.13  | up   | 1.33 | down | 1.98   | up   | 1.23 | down | 6.06  | up   | 1.45 | up   | 3   |
| OsAffx.29875.1.S1_at  | LOC_Os09g16520 | cytochrome b5-like Heme/Steroid binding domain containing protein, expressed                | 1.51  | down | 1.31 | down | 4.44   | down | 1.21 | down | 2.17  | down | 1.18 | down | 2   |
| OsAffx.29875.1.S1_s_a | LOC_Os09g16520 | cytochrome b5-like Heme/Steroid binding domain containing protein, expressed                | 1.21  | down | 1.17 | down | 4.53   | down | 1.18 | down | 2.25  | down | 1.62 | down | 2   |
| OsAffx.29955.1.S1_at  | LOC_Os09g21120 | armadillo/beta-catenin repeat family protein, putative, expressed                           | 1.10  | down | 1.09 | down | 27.23  | up   | 1.01 | down | 1.01  | down | 1.01 | up   | ABA |
| OsAffx.29958.1.S1_at  | LOC_Os09g21180 | homeobox associated leucine zipper, putative, expressed                                     | 1.24  | up   | 1.43 | up   | 15.80  | up   | 1.96 | down | 2.25  | up   | 1.31 | up   | 3   |
| OsAffx.29958.1.S1_x_a | LOC_Os09g21180 | homeobox associated leucine zipper, putative, expressed                                     | 1.67  | up   | 1.70 | up   | 17.02  | up   | 1.87 | down | 2.21  | up   | 1.25 | up   | 2   |
| OsAffx.30020.1.A1_at  | LOC_Os09g25740 | expressed protein                                                                           | 1.00  | up   | 1.01 | up   | 2.09   | up   | 1.04 | down | 1.04  | down | 1.01 | down | ABA |
| OsAffx.30039.1.S1_at  | LOC_Os09g26500 | CXE carboxylesterase, putative, expressed                                                   | 1.02  | down | 1.01 | down | 2.00   | up   | 1.72 | up   | 2.65  | up   | 1.06 | up   | 2   |
| OsAffx.30042.1.S1_at  | 9637           | ---                                                                                         | 1.15  | down | 1.23 | down | 6.78   | up   | 1.08 | up   | 1.70  | up   | 1.25 | up   | ABA |
| OsAffx.30042.1.S1_x_a | LOC_Os09g26570 | CAAX amino terminal protease family protein, putative, expressed                            | 1.11  | down | 1.46 | down | 10.57  | up   | 1.07 | down | 1.38  | up   | 1.05 | down | ABA |
| OsAffx.30049.1.S1_at  | LOC_Os09g26920 | OsSub57 - Putative Subtilisin homologue, expressed                                          | 1.00  | up   | 1.17 | down | 19.36  | up   | 1.34 | down | 1.02  | down | 1.20 | down | ABA |
| OsAffx.30049.1.S1_x_a | LOC_Os09g26920 | OsSub57 - Putative Subtilisin homologue, expressed                                          | 1.06  | up   | 1.00 | down | 16.69  | up   | 1.09 | down | 1.09  | down | 1.08 | down | ABA |
| OsAffx.30069.1.S1_at  | LOC_Os09g28910 | carbonic anhydrase, chloroplast precursor, putative, expressed                              | 1.02  | down | 1.08 | up   | 5.04   | up   | 1.03 | down | 1.04  | down | 1.03 | up   | ABA |
| OsAffx.30080.1.S1_at  | LOC_Os09g29510 | OsWAK80 - OsWAK receptor-like protein kinase, expressed                                     | 1.19  | up   | 1.17 | down | 1.37   | down | 3.93 | up   | 1.82  | up   | 6.23 | up   | 2   |
| OsAffx.30127.1.S1_at  | LOC_Os09g33650 | expressed protein                                                                           | 3.52  | down | 1.22 | up   | 3.24   | down | 1.80 | down | 1.57  | down | 5.93 | up   | 3   |
| OsAffx.30152.1.S1_s_a | LOC_Os09g36490 | expressed protein                                                                           | 1.20  | down | 1.03 | up   | 1.03   | down | 1.05 | up   | 2.34  | down | 1.02 | down | SA  |
| OsAffx.30169.1.S1_at  | LOC_Os09g37430 | OsSAUR48 - Auxin-responsive SAUR gene family member                                         | 10.70 | up   | 1.62 | down | 1.02   | down | 1.01 | up   | 1.00  | down | 1.02 | up   | IAA |
| OsAffx.30176.1.S1_at  | LOC_Os09g37710 | NIN, putative, expressed                                                                    | 1.05  | up   | 2.68 | down | 2.14   | down | 1.73 | down | 1.09  | up   | 1.19 | down | 2   |
| OsAffx.30183.1.S1_at  | LOC_Os09g37930 | expressed protein                                                                           | 1.06  | up   | 1.10 | down | 2.37   | up   | 1.17 | up   | 2.09  | up   | 1.21 | up   | 2   |
| OsAffx.30365.1.S1_at  | LOC_Os10g09920 | LTPL132 - Protease inhibitor/seed storage/LTP family protein precursor, putative, expressed | 1.01  | down | 1.00 | up   | 395.45 | up   | 1.01 | up   | 1.00  | down | 1.01 | up   | ABA |
| OsAffx.30368.1.S1_at  | LOC_Os10g10030 | OsWAK111 - OsWAK receptor-like protein kinase, expressed                                    | 1.01  | down | 1.00 | up   | 19.46  | up   | 1.00 | up   | 1.01  | up   | 1.02 | up   | ABA |
| OsAffx.3043.1.S1_s_at | LOC_Os02g52190 | helix-loop-helix DNA-binding protein, putative, expressed                                   | 1.22  | down | 3.95 | up   | 2.01   | up   | 1.44 | up   | 1.05  | down | 1.35 | down | 2   |
| OsAffx.30613.1.S1_x_a | LOC_Os02g14250 | transposon protein, putative, unclassified                                                  | 1.52  | up   | 2.59 | down | 5.83   | up   | 1.05 | up   | 1.46  | up   | 1.13 | up   | 2   |
| OsAffx.30613.3.S1_x_a | LOC_Os07g34120 | transposon protein, putative, unclassified                                                  | 1.84  | up   | 2.69 | down | 10.12  | up   | 1.29 | up   | 2.28  | up   | 1.35 | up   | 3   |
| OsAffx.30647.1.S1_x_a | LOC_Os10g32940 | expressed protein                                                                           | 1.72  | up   | 2.93 | up   | 1.11   | down | 1.18 | down | 1.91  | down | 1.62 | down | BAP |
| OsAffx.30689.1.S1_at  | LOC_Os10g36390 | monocopper oxidase, putative                                                                | 1.13  | up   | 1.00 | up   | 11.14  | down | 1.03 | down | 2.63  | down | 1.45 | down | 2   |
| OsAffx.3069.1.S1_at   | LOC_Os02g54450 | hypro1, putative, expressed                                                                 | 1.60  | down | 1.58 | down | 4.79   | down | 2.17 | down | 3.42  | down | 4.23 | down | 4   |
| OsAffx.3071.1.S1_at   | LOC_Os02g54520 | MYB family transcription factor, putative, expressed                                        | 1.15  | down | 1.12 | down | 4.84   | up   | 1.13 | down | 1.15  | down | 1.15 | down | ABA |
| OsAffx.30714.1.S1_x_a | LOC_Os10g38800 | leucine-rich repeat transmembrane protein kinase, putative, expressed                       | 1.19  | down | 1.23 | down | 2.55   | down | 1.08 | up   | 1.02  | up   | 1.01 | down | ABA |
| OsAffx.30751.1.S1_at  | LOC_Os12g16350 | enoyl-CoA hydratase/isomerase family protein, putative, expressed                           | 1.57  | up   | 1.22 | up   | 2.72   | up   | 1.44 | down | 1.27  | up   | 1.05 | up   | ABA |
| OsAffx.30751.2.S1_at  | LOC_Os10g42210 | enoyl-CoA-hydratase, putative, expressed                                                    | 1.20  | down | 1.11 | down | 3.44   | up   | 1.07 | down | 1.58  | up   | 1.07 | up   | ABA |
| OsAffx.30855.1.S1_x_a | LOC_Os11g07140 | receptor kinase, putative, expressed                                                        | 1.33  | up   | 1.27 | up   | 2.13   | down | 1.39 | down | 1.85  | up   | 1.46 | up   | ABA |
| OsAffx.30930.1.S1_at  | LOC_Os11g11530 | ZmEBE-1 protein, putative, expressed                                                        | 1.01  | down | 1.02 | up   | 2.86   | up   | 1.00 | down | 1.03  | up   | 1.14 | up   | ABA |
| OsAffx.30969.1.S1_at  | LOC_Os11g14050 | leucine-rich repeat family protein, putative, expressed                                     | 1.25  | down | 1.24 | down | 7.74   | down | 2.24 | down | 7.35  | down | 7.11 | down | 4   |
| OsAffx.31049.1.S1_at  | LOC_Os11g18870 | osFTL11 FT-Like11 homologous to Flowering Locus T gene; contains Pfam profile PF            | 1.08  | down | 1.81 | up   | 5.07   | up   | 1.10 | down | 1.56  | up   | 1.83 | up   | ABA |
| OsAffx.31060.1.S1_s_a | LOC_Os11g19460 | haloacid dehalogenase-like hydrolase family protein, putative, expressed                    | 1.11  | up   | 1.09 | up   | 2.65   | up   | 1.17 | up   | 1.22  | up   | 1.15 | down | ABA |
| OsAffx.31123.1.S1_x_a | LOC_Os11g25030 | mitochondrial 2-oxoglutarate/malate translocator, putative                                  | 1.10  | up   | 1.11 | down | 2.21   | down | 1.44 | down | 1.53  | down | 1.13 | down | ABA |
| OsAffx.31140.1.S1_at  | LOC_Os11g26570 | dehydrin, putative, expressed                                                               | 1.22  | down | 1.58 | down | 199.34 | up   | 1.28 | down | 1.01  | up   | 1.07 | up   | ABA |
| OsAffx.3120.1.S1_at   | LOC_Os03g03000 | helix-loop-helix DNA-binding domain containing protein, expressed                           | 1.86  | down | 2.82 | down | 1.06   | down | 1.00 | down | 1.19  | up   | 1.09 | up   | BAP |
| OsAffx.31237.1.S1_at  | LOC_Os11g31090 | transferase family protein, putative, expressed                                             | 2.22  | up   | 1.46 | up   | 5.67   | up   | 1.33 | down | 1.77  | up   | 1.55 | down | 2   |
| OsAffx.3129.1.S1_x_at | LOC_Os03g04470 | expressed protein                                                                           | 1.25  | up   | 1.04 | up   | 2.15   | down | 1.10 | down | 1.34  | down | 1.06 | down | ABA |
| OsAffx.31296.1.S1_at  | LOC_Os11g34440 | phospholipase A2, putative, expressed                                                       | 1.02  | up   | 1.05 | up   | 7.02   | up   | 1.00 | down | 1.04  | up   | 1.02 | up   | ABA |
| OsAffx.31336.1.S1_at  | LOC_Os11g36940 | glucan endo-1,3-beta-glucosidase precursor, putative, expressed                             | 1.11  | up   | 1.13 | down | 2.68   | down | 1.13 | down | 1.15  | down | 1.36 | up   | ABA |
| OsAffx.31339.1.S1_s_a | LOC_Os11g37080 | hACA ribonucleoprotein complex subunit 1-like protein 1, putative, expressed                | 1.02  | down | 1.13 | up   | 2.01   | down | 1.20 | up   | 1.34  | down | 1.18 | down | ABA |
| OsAffx.3135.1.S1_at   | LOC_Os03g04900 | MYB family transcription factor, putative, expressed                                        | 1.38  | down | 1.52 | up   | 38.67  | up   | 1.51 | down | 1.55  | down | 1.45 | down | ABA |
| OsAffx.31356.1.S1_at  | LOC_Os11g37880 | stripe rust resistance protein Yr10, putative, expressed                                    | 1.24  | down | 1.12 | down | 10.02  | up   | 1.05 | down | 1.03  | down | 1.03 | up   | ABA |
| OsAffx.31409.1.S1_s_a | LOC_Os03g19270 | Universal stress domain protein containing protein                                          | 1.56  | down | 1.11 | up   | 38.66  | up   | 1.81 | up   | 2.84  | up   | 1.14 | down | 2   |
| OsAffx.31420.1.S1_at  | LOC_Os11g41150 | nitrilase-associated protein, putative, expressed                                           | 1.93  | down | 1.30 | up   | 4.09   | down | 1.02 | down | 1.84  | down | 1.03 | up   | ABA |
| OsAffx.31457.1.S1_at  | LOC_Os11g43480 | Leucine Rich Repeat family protein, expressed                                               | 1.52  | up   | 1.00 | down | 1.04   | down | 1.01 | up   | 6.22  | up   | 1.01 | up   | SA  |
| OsAffx.3147.1.S1_s_at | LOC_Os03g06250 | retrotransposon protein, putative, unclassified, expressed                                  | 1.07  | down | 1.17 | down | 4.36   | up   | 1.04 | down | 1.02  | up   | 1.12 | down | ABA |

|                       |                |                                                                                         |       |      |      |      |       |      |      |      |       |      |      |      |     |
|-----------------------|----------------|-----------------------------------------------------------------------------------------|-------|------|------|------|-------|------|------|------|-------|------|------|------|-----|
| OsAffx.31531.1.S1_s_a | LOC_Os11g48060 | laccase-22 precursor, putative, expressed                                               | 1.56  | down | 1.23 | up   | 5.39  | down | 1.72 | down | 5.78  | down | 3.73 | down | 3   |
| OsAffx.31567.1.S1_at  | LOC_Os11g03880 | D-mannose binding lectin family protein, expressed                                      | 1.03  | down | 1.01 | up   | 17.78 | up   | 1.15 | up   | 1.07  | down | 1.07 | down | ABA |
| OsAffx.31572.1.S1_at  | LOC_Os11g04320 | phosphoglycerate mutase, putative, expressed                                            | 1.50  | up   | 1.29 | up   | 1.10  | up   | 2.03 | down | 1.12  | down | 1.14 | down | ACC |
| OsAffx.31574.2.S1_at  | LOC_Os12g04320 | sulfotransferase domain containing protein, expressed                                   | 13.07 | down | 1.77 | up   | 54.13 | down | 1.17 | down | 9.54  | down | 8.12 | down | 4   |
| OsAffx.31633.1.S1_s_a | LOC_Os12g07480 | TCP family transcription factor, putative, expressed                                    | 2.00  | down | 1.19 | down | 1.14  | up   | 1.25 | up   | 1.12  | down | 1.08 | down | IAA |
| OsAffx.31649.1.S1_at  | LOC_Os12g08700 | expressed protein                                                                       | 1.77  | up   | 1.35 | down | 49.76 | up   | 1.00 | down | 1.00  | up   | 1.01 | up   | ABA |
| OsAffx.31710.1.S1_x_a | LOC_Os12g12260 | diacylglycerol kinase 1, putative, expressed                                            | 1.65  | up   | 1.08 | down | 2.67  | up   | 1.24 | down | 1.06  | down | 1.37 | up   | ABA |
| OsAffx.31974.1.S1_at  | LOC_Os12g32200 | expressed protein                                                                       | 1.03  | down | 1.03 | down | 9.92  | up   | 1.00 | up   | 1.00  | down | 1.02 | up   | ABA |
| OsAffx.31986.1.S1_at  | LOC_Os12g32610 | expressed protein                                                                       | 1.36  | up   | 1.33 | up   | 18.85 | up   | 1.15 | down | 1.14  | up   | 1.06 | down | ABA |
| OsAffx.32171.3.S1_at  | LOC_Os12g43490 | thaumatin, putative, expressed                                                          | 1.17  | up   | 1.31 | up   | 5.24  | up   | 1.15 | down | 1.08  | up   | 1.03 | up   | ABA |
| OsAffx.32172.1.S1_s_a | LOC_Os12g43580 | expressed protein                                                                       | 1.13  | up   | 1.20 | up   | 2.82  | up   | 1.12 | up   | 1.25  | up   | 1.09 | down | ABA |
| OsAffx.32182.1.S1_at  | LOC_Os12g43880 | DNA binding protein, putative, expressed                                                | 1.40  | up   | 1.07 | down | 3.68  | up   | 1.13 | up   | 1.33  | up   | 1.10 | down | ABA |
| OsAffx.32225.1.S1_x_a | LOC_Os01g57966 | photosystem I assembly protein ycf3, putative                                           | 1.07  | down | 1.21 | down | 1.04  | down | 1.14 | down | 2.63  | up   | 1.93 | up   | SA  |
| OsAffx.32247.1.A1_at  | LOC_Os12g34012 | cytochrome c biosynthesis ccmC-like mitochondrial protein, putative                     | 1.03  | down | 1.41 | up   | 2.19  | up   | 1.72 | up   | 1.34  | up   | 1.19 | up   | ABA |
| OsAffx.32297.1.A1_at  | BA000029       | ---                                                                                     | 1.17  | down | 1.02 | down | 1.63  | up   | 2.09 | up   | 1.02  | up   | 1.03 | up   | ACC |
| OsAffx.32318.1.A1_at  | AK242621       | Oryza sativa Japonica Group cDNA, clone: J090019C07, full insert sequence.              | 1.00  | down | 1.01 | up   | 2.50  | up   | 1.34 | up   | 1.00  | up   | 1.02 | up   | ABA |
| OsAffx.3240.1.S1_s_at | LOC_Os03g14370 | ACT domain containing protein, expressed                                                | 1.86  | up   | 1.12 | up   | 3.23  | up   | 1.03 | down | 1.27  | up   | 1.74 | up   | ABA |
| OsAffx.3268.1.S1_x_at | LOC_Os03g18360 | BTBT1 - Bric-a-Brac, Tramtrack, Broad Complex BTB domain with tetratricopeptide rep     | 2.34  | up   | 1.07 | down | 1.10  | up   | 1.72 | up   | 1.06  | up   | 1.08 | up   | IAA |
| OsAffx.3275.1.S1_at   | LOC_Os03g19400 | expressed protein                                                                       | 1.15  | up   | 1.23 | down | 3.88  | up   | 1.25 | down | 1.29  | up   | 1.21 | down | ABA |
| OsAffx.3427.1.S1_at   | LOC_Os03g37960 | acyl CoA binding protein, putative                                                      | 1.11  | up   | 1.07 | up   | 3.95  | down | 1.08 | down | 1.23  | up   | 1.34 | up   | ABA |
| OsAffx.3461.1.S1_at   | LOC_Os03g40550 | kinase, pfkB family, putative, expressed                                                | 1.34  | up   | 1.29 | up   | 3.89  | down | 1.04 | down | 2.06  | down | 1.27 | down | 2   |
| OsAffx.3504.1.S1_at   | LOC_Os03g43720 | transporter family protein, putative, expressed                                         | 1.22  | down | 1.48 | down | 13.67 | up   | 1.01 | up   | 1.01  | up   | 1.02 | up   | ABA |
| OsAffx.3504.1.S1_x_at | LOC_Os03g43720 | transporter family protein, putative, expressed                                         | 1.06  | up   | 1.51 | down | 20.18 | up   | 1.63 | up   | 2.86  | up   | 1.22 | up   | 2   |
| OsAffx.3569.1.S1_at   | LOC_Os03g50960 | LTPL118 - Protease inhibitor/seed storage/LTP family protein precursor, expressed       | 1.12  | up   | 1.16 | down | 2.64  | up   | 2.23 | down | 2.89  | up   | 1.16 | up   | 3   |
| OsAffx.3569.1.S1_x_at | LOC_Os03g50960 | LTPL118 - Protease inhibitor/seed storage/LTP family protein precursor, expressed       | 1.20  | up   | 1.18 | down | 2.74  | up   | 2.14 | down | 3.02  | up   | 1.18 | up   | 3   |
| OsAffx.3602.1.S1_at   | LOC_Os03g53390 | expressed protein                                                                       | 1.02  | up   | 1.06 | down | 5.59  | up   | 1.08 | up   | 1.04  | up   | 1.06 | up   | ABA |
| OsAffx.3606.1.S1_s_at | AK105937       | Oryza sativa Japonica Group cDNA clone:001-205-B08, full insert sequence.               | 1.21  | down | 1.03 | down | 2.19  | up   | 1.00 | down | 1.10  | up   | 1.50 | up   | ABA |
| OsAffx.3640.1.S1_at   | LOC_Os03g58940 | LTPL83 - Protease inhibitor/seed storage/LTP family protein precursor, putative, expres | 1.04  | down | 1.25 | down | 2.71  | down | 1.14 | down | 1.25  | down | 1.30 | up   | ABA |
| OsAffx.3672.1.S1_at   | LOC_Os03g62270 | MATE efflux family protein, putative, expressed                                         | 1.78  | up   | 2.05 | up   | 1.34  | down | 1.18 | up   | 3.47  | down | 1.69 | down | 2   |
| OsAffx.3952.1.S1_s_at | LOC_Os04g30420 | dehydrogenase, putative, expressed                                                      | 1.30  | up   | 1.03 | up   | 1.83  | up   | 1.12 | down | 2.71  | up   | 1.06 | up   | SA  |
| OsAffx.3967.1.S1_s_at | LOC_Os04g31520 | RALFL21 - Rapid Alkalinization Factor RALF family protein precursor, expressed          | 1.30  | down | 1.25 | down | 3.73  | down | 1.27 | down | 1.52  | down | 1.30 | down | ABA |
| OsAffx.3968.1.S1_at   | LOC_Os04g31710 | expressed protein                                                                       | 1.00  | up   | 1.00 | up   | 62.50 | up   | 1.01 | up   | 1.00  | down | 1.02 | up   | ABA |
| OsAffx.3994.1.S1_at   | LOC_Os04g34250 | serine/threonine-protein kinase receptor precursor, putative, expressed                 | 1.17  | up   | 2.22 | down | 6.93  | up   | 2.00 | down | 1.40  | up   | 1.65 | up   | 3   |
| OsAffx.4035.1.S1_x_at | LOC_Os04g40070 | GRAM and C2 domains containing protein, putative, expressed                             | 1.04  | down | 1.03 | down | 49.26 | up   | 1.01 | down | 1.02  | up   | 1.01 | up   | ABA |
| OsAffx.4107.1.S1_s_at | LOC_Os04g46350 | homeobox associated leucine zipper, putative, expressed                                 | 3.43  | up   | 1.14 | down | 1.42  | up   | 1.06 | up   | 1.63  | up   | 1.18 | down | IAA |
| OsAffx.4157.1.S1_x_at | LOC_Os04g52614 | SHR5-receptor-like kinase, putative, expressed                                          | 1.03  | down | 1.08 | down | 2.19  | down | 1.28 | up   | 1.09  | up   | 1.36 | up   | ABA |
| OsAffx.4158.1.S1_at   | LOC_Os04g52720 | Cupin domain containing protein, expressed                                              | 1.03  | down | 1.11 | up   | 1.92  | down | 1.35 | up   | 1.93  | down | 9.86 | up   | JA  |
| OsAffx.4159.1.S1_x_at | LOC_Os04g52730 | NAD dependent epimerase/dehydratase family domain containing protein, expressed         | 1.13  | up   | 1.39 | down | 1.67  | up   | 1.03 | up   | 1.31  | up   | 2.46 | up   | JA  |
| OsAffx.4161.1.S1_at   | LOC_Os04g52900 | ABC transporter family protein, putative, expressed                                     | 1.60  | up   | 1.13 | up   | 1.25  | down | 1.08 | down | 2.11  | up   | 1.30 | up   | SA  |
| OsAffx.4168.1.S1_s_at | LOC_Os04g53560 | expressed protein                                                                       | 1.53  | down | 2.74 | up   | 30.99 | down | 1.12 | down | 7.92  | down | 1.25 | down | 3   |
| OsAffx.4180.1.S1_at   | LOC_Os04g55100 | expressed protein                                                                       | 34.79 | up   | 1.19 | down | 1.13  | down | 1.04 | down | 1.03  | down | 1.00 | up   | IAA |
| OsAffx.4219.1.S1_at   | LOC_Os05g01100 | expressed protein                                                                       | 1.19  | up   | 1.03 | down | 3.34  | up   | 1.13 | up   | 1.02  | up   | 1.03 | up   | ABA |
| OsAffx.4250.1.S1_at   | LOC_Os05g04440 | peroxidase precursor, putative, expressed                                               | 2.76  | down | 1.95 | down | 9.22  | down | 1.41 | down | 4.21  | down | 1.86 | down | 3   |
| OsAffx.4276.1.S1_s_at | LOC_Os05g08360 | rRNA 2-O-methyltransferase fibrillarzin 2, putative, expressed                          | 1.01  | up   | 1.12 | up   | 2.29  | down | 1.20 | up   | 1.25  | down | 1.11 | down | ABA |
| OsAffx.4296.1.S1_at   | LOC_Os05g10930 | OsGrx_C15 - glutaredoxin subgroup III, expressed                                        | 1.89  | up   | 2.02 | down | 2.34  | up   | 1.07 | up   | 1.63  | up   | 1.40 | up   | 3   |
| OsAffx.4511.1.S1_at   | LOC_Os05g33900 | auxin-induced protein 5NG4, putative, expressed                                         | 1.83  | up   | 1.29 | down | 2.86  | up   | 1.03 | up   | 1.01  | up   | 1.03 | up   | ABA |
| OsAffx.4557.1.S1_s_at | LOC_Os05g39250 | phosphatidylethanolamine-binding protein, putative, expressed                           | 1.19  | down | 1.21 | up   | 85.66 | up   | 1.59 | down | 1.20  | up   | 1.03 | down | ABA |
| OsAffx.4567.1.S1_at   | LOC_Os05g40080 | OsWRKY54 - Superfamily of TFs having WRKY and zinc finger domains                       | 1.01  | down | 1.00 | up   | 1.00  | up   | 1.01 | up   | 14.85 | up   | 1.02 | up   | SA  |
| OsAffx.4639.1.S1_at   | LOC_Os05g46610 | myb-like DNA-binding domain containing protein, putative, expressed                     | 1.20  | down | 1.34 | up   | 4.12  | down | 1.45 | down | 1.56  | down | 1.30 | up   | ABA |
| OsAffx.4672.1.S1_at   | LOC_Os05g49810 | armadillo/beta-catenin-like repeat containing protein                                   | 1.03  | down | 1.15 | down | 1.46  | up   | 1.03 | down | 1.01  | up   | 3.00 | up   | JA  |
| OsAffx.4676.1.S1_s_at | LOC_Os05g50450 | hypothetical protein                                                                    | 1.12  | down | 1.05 | down | 2.22  | up   | 1.01 | up   | 1.24  | up   | 1.03 | up   | ABA |
| OsAffx.4696.1.S1_at   | LOC_Os06g02390 | ADP-ribosylation factor 1, putative                                                     | 1.22  | down | 1.20 | down | 2.10  | down | 1.91 | down | 1.94  | down | 1.75 | down | ABA |
| OsAffx.4762.1.S1_at   | LOC_Os06g08130 | hypothetical protein                                                                    | 14.28 | up   | 1.00 | up   | 1.04  | down | 1.01 | down | 1.01  | down | 1.06 | up   | IAA |
| OsAffx.5019.1.S1_at   | LOC_Os06g35630 | reticuline oxidase-like protein precursor, putative, expressed                          | 1.52  | up   | 2.29 | up   | 1.19  | down | 1.52 | up   | 1.97  | down | 2.43 | down | 3   |
| OsAffx.5050.1.S1_at   | LOC_Os06g38750 | proline-rich family protein, putative, expressed                                        | 1.23  | down | 1.65 | up   | 2.16  | down | 1.02 | up   | 1.39  | down | 1.80 | down | ABA |

|                       |                |                                                                                     |       |      |       |      |        |      |      |      |       |      |      |      |     |
|-----------------------|----------------|-------------------------------------------------------------------------------------|-------|------|-------|------|--------|------|------|------|-------|------|------|------|-----|
| OsAffx.5079.1.S1_at   | LOC_Os06g41880 | OsSub51 - Putative Subtilisin homologue, expressed                                  | 3.67  | up   | 1.04  | down | 1.02   | down | 1.01 | up   | 1.03  | up   | 1.02 | up   | IAA |
| OsAffx.5098.1.S1_at   | LOC_Os06g43950 | expressed protein                                                                   | 1.15  | up   | 1.10  | up   | 2.88   | up   | 1.01 | up   | 1.28  | up   | 1.08 | up   | ABA |
| OsAffx.5153.1.S1_at   | CT832798       | Oryza sativa (indica cultivar-group) cDNA clone:OSIGCFA009A02, full insert sequence | 1.05  | up   | 1.06  | down | 2.12   | up   | 1.06 | up   | 1.21  | up   | 1.05 | up   | ABA |
| OsAffx.5232.1.S1_s_at | LOC_Os07g06460 | expressed protein                                                                   | 1.43  | down | 1.00  | down | 1.40   | up   | 1.57 | up   | 3.14  | up   | 2.07 | up   | 2   |
| OsAffx.5257.1.S1_at   | LOC_Os07g08970 | uncharacterized protein ycf45, putative, expressed                                  | 1.47  | up   | 1.73  | down | 6.19   | up   | 1.15 | up   | 1.31  | up   | 1.20 | up   | ABA |
| OsAffx.5423.1.S1_at   | LOC_Os07g23970 | zinc finger, C3HC4 type domain containing protein, expressed                        | 1.06  | down | 1.16  | down | 2.12   | down | 1.20 | down | 1.27  | down | 1.26 | down | ABA |
| OsAffx.5522.1.S1_s_at | LOC_Os07g34110 | integral membrane protein DUF6 containing protein, expressed                        | 2.09  | up   | 1.47  | down | 5.92   | up   | 1.15 | down | 1.86  | up   | 1.54 | down | 2   |
| OsAffx.5607.1.S1_x_at | LOC_Os07g42280 | von Willebrand factor type A domain containing protein, expressed                   | 1.07  | down | 1.11  | down | 3.40   | up   | 1.09 | down | 1.78  | up   | 1.13 | up   | ABA |
| OsAffx.5699.1.S1_at   | LOC_Os08g04470 | U box protein 8, putative, expressed                                                | 1.08  | up   | 1.06  | up   | 2.41   | up   | 1.12 | up   | 1.15  | up   | 1.17 | up   | ABA |
| OsAffx.5702.1.S1_s_at | LOC_Os08g04560 | decarboxylase, putative, expressed                                                  | 1.24  | down | 1.03  | down | 2.45   | up   | 1.30 | down | 1.83  | up   | 1.55 | up   | ABA |
| OsAffx.5729.1.S1_at   | LOC_Os08g07070 | expressed protein                                                                   | 15.60 | up   | 1.04  | down | 1.53   | down | 1.48 | down | 1.51  | down | 1.48 | down | IAA |
| OsAffx.5859.1.S1_x_at | LOC_Os08g17680 | stromal cell-derived factor 2-like protein precursor, putative, expressed           | 1.19  | down | 1.20  | up   | 3.13   | down | 1.16 | up   | 1.20  | down | 1.13 | up   | ABA |
| OsAffx.6015.1.S1_at   | LOC_Os08g33740 | CSLA11 - cellulose synthase-like family A, expressed                                | 1.05  | down | 1.19  | down | 3.55   | down | 1.39 | down | 1.44  | down | 1.26 | up   | ABA |
| OsAffx.6051.1.S1_at   | LOC_Os08g37010 | gibberellin receptor GID1L2, putative, expressed                                    | 1.32  | down | 1.90  | up   | 16.22  | up   | 1.17 | up   | 2.16  | down | 1.14 | down | 2   |
| OsAffx.6128.1.S1_at   | LOC_Os08g43850 | carrier, putative                                                                   | 3.32  | up   | 1.06  | up   | 1.66   | down | 1.20 | down | 1.58  | down | 1.08 | down | IAA |
| OsAffx.6132.1.S1_s_at | LOC_Os08g44190 | ZOS8-13 - C2H2 zinc finger protein, expressed                                       | 1.42  | up   | 1.50  | up   | 3.31   | up   | 2.50 | up   | 3.38  | up   | 1.44 | down | 3   |
| OsAffx.6250.1.S1_at   | LOC_Os09g12400 | hypothetical protein                                                                | 2.77  | down | 1.71  | down | 10.98  | down | 1.29 | down | 4.92  | down | 3.04 | down | 4   |
| OsAffx.6270.1.S1_at   | LOC_Os09g14450 | pollen signalling protein with adenyl cyclase activity, putative, expressed         | 2.37  | down | 1.59  | up   | 1.85   | down | 2.01 | up   | 1.17  | up   | 1.12 | up   | 2   |
| OsAffx.6292.1.S1_at   | LOC_Os09g16090 | UDP-glucuronosyl/UDP-glucosyl transferase, putative, expressed                      | 1.69  | down | 1.25  | up   | 17.31  | down | 1.25 | down | 2.15  | down | 4.22 | down | 3   |
| OsAffx.6325.1.S1_at   | LOC_Os09g18450 | flavonol synthase/flavanone 3-hydroxylase, putative, expressed                      | 1.74  | down | 1.88  | down | 5.69   | down | 1.50 | down | 1.92  | down | 1.25 | down | ABA |
| OsAffx.6397.1.S1_at   | LOC_Os09g25690 | retrotransposon protein, putative, unclassified                                     | 1.03  | down | 1.11  | up   | 39.43  | up   | 1.27 | up   | 1.53  | up   | 1.14 | up   | ABA |
| OsAffx.6404.1.S1_at   | LOC_Os09g26170 | MYB family transcription factor, putative, expressed                                | 1.82  | down | 2.21  | down | 11.99  | down | 1.22 | up   | 1.18  | down | 1.07 | up   | 2   |
| OsAffx.6406.1.S1_at   | LOC_Os09g26490 | alpha/beta hydrolase fold, putative                                                 | 1.36  | up   | 1.05  | down | 8.24   | up   | 1.20 | up   | 1.85  | up   | 1.58 | up   | ABA |
| OsAffx.6408.1.S1_at   | LOC_Os09g26610 | OsSAUR38 - Auxin-responsive SAUR gene family member, expressed                      | 2.33  | down | 1.07  | down | 1.95   | up   | 1.16 | down | 1.13  | up   | 1.34 | down | IAA |
| OsAffx.6455.1.S1_at   | LOC_Os09g30474 | BPI/LBP family protein At3g20270 precursor, putative, expressed                     | 1.12  | up   | 1.19  | down | 3.04   | up   | 1.16 | up   | 1.47  | up   | 1.01 | up   | ABA |
| OsAffx.6464.1.S1_at   | LOC_Os09g31990 | expressed protein                                                                   | 12.36 | up   | 1.00  | down | 1.07   | down | 1.03 | down | 16.45 | up   | 1.04 | up   | 2   |
| OsAffx.6497.1.S1_s_at | LOC_Os09g36850 | expressed protein                                                                   | 3.39  | up   | 1.04  | up   | 1.05   | down | 1.10 | up   | 1.16  | up   | 1.06 | up   | IAA |
| OsAffx.6501.1.S1_x_at | LOC_Os09g37120 | pyridoxal-dependent decarboxylase protein, putative, expressed                      | 1.12  | down | 1.76  | up   | 7.06   | down | 1.09 | down | 2.78  | down | 1.59 | down | 2   |
| OsAffx.6505.1.S1_at   | LOC_Os09g37440 | OsSAUR49 - Auxin-responsive SAUR gene family member                                 | 12.71 | up   | 1.17  | down | 1.10   | down | 1.14 | up   | 1.35  | up   | 1.02 | up   | IAA |
| OsAffx.6534.1.S1_at   | LOC_Os09g39620 | protein kinase family protein, putative, expressed                                  | 1.83  | up   | 1.82  | down | 2.96   | up   | 1.31 | up   | 3.31  | up   | 1.76 | down | 2   |
| OsAffx.6703.1.S1_s_at | LOC_Os10g19925 | conserved hypothetical protein                                                      | 1.01  | up   | 1.00  | up   | 1.12   | up   | 1.02 | up   | 17.44 | up   | 1.03 | up   | SA  |
| OsAffx.6920.1.S1_at   | LOC_Os10g39990 | short-chain dehydrogenase/reductase SDR, putative                                   | 1.00  | down | 1.01  | up   | 6.51   | up   | 1.01 | up   | 1.01  | up   | 1.02 | down | ABA |
| OsAffx.7025.1.S1_at   | LOC_Os11g06770 | ethylene-responsive transcription factor ERF110, putative, expressed                | 1.64  | up   | 1.54  | down | 3.69   | up   | 1.11 | down | 10.28 | up   | 1.71 | up   | 2   |
| OsAffx.7132.1.S1_at   | LOC_Os11g17380 | protein kinase domain containing protein                                            | 1.35  | down | 1.67  | down | 29.52  | down | 1.02 | down | 3.21  | down | 4.26 | down | 3   |
| OsAffx.7243.1.S1_s_at | LOC_Os11g29210 | resistance-gene-interacting protein, putative, expressed                            | 1.26  | down | 1.22  | down | 8.54   | down | 1.52 | up   | 1.68  | up   | 1.27 | up   | ABA |
| OsAffx.7265.1.S1_at   | LOC_Os11g31380 | no apical meristem protein, putative                                                | 1.01  | down | 1.00  | up   | 124.52 | up   | 1.01 | up   | 1.00  | down | 1.01 | up   | ABA |
| OsAffx.7376.1.S1_at   | LOC_Os11g41650 | adenyllyl-sulfate kinase, putative, expressed                                       | 1.01  | down | 6.46  | down | 2.74   | up   | 1.35 | up   | 1.04  | up   | 1.35 | down | 2   |
| OsAffx.7517.1.S1_x_at | LOC_Os12g07580 | dirigent, putative, expressed                                                       | 1.20  | up   | 1.05  | up   | 2.50   | down | 1.46 | down | 1.46  | down | 1.08 | down | ABA |
| OsAffx.7625.1.S1_at   | LOC_Os12g17860 | retrotransposon protein, putative, Ty3-gypsy subclass                               | 1.01  | down | 1.00  | up   | 1.02   | down | 1.01 | up   | 21.93 | up   | 1.02 | up   | SA  |
| OsAffx.7704.1.S1_at   | LOC_Os12g26030 | FACT complex subunit SPT16, putative, expressed                                     | 1.17  | up   | 1.58  | down | 2.33   | up   | 1.70 | up   | 1.61  | up   | 1.60 | up   | ABA |
| OsAffx.7733.1.S1_at   | LOC_Os12g29330 | no apical meristem protein, putative, expressed                                     | 1.50  | up   | 1.56  | up   | 2.06   | up   | 1.17 | up   | 1.40  | up   | 1.08 | up   | ABA |
| OsAffx.7735.1.S1_at   | LOC_Os12g29430 | OsWAK125 - OsWAK receptor-like protein OsWAK-RLP, expressed                         | 1.12  | up   | 1.04  | up   | 1.02   | down | 1.00 | up   | 1.00  | up   | 8.07 | up   | JA  |
| OsAffx.7876.1.S1_s_at | LOC_Os12g43140 | late embryogenesis abundant protein D-34, putative, expressed                       | 1.00  | down | 1.09  | up   | 469.85 | up   | 1.28 | up   | 1.17  | up   | 1.50 | up   | ABA |
| OsAffx.8033.1.S1_at   | LOC_Os10g33060 | hcr2-5D, putative                                                                   | 1.15  | down | 1.87  | down | 5.46   | up   | 1.06 | down | 1.06  | up   | 1.40 | down | ABA |
| OsAffx.9161.1.S1_at   | LOC_Os01g41720 | conserved hypothetical protein                                                      | 1.01  | down | 1.00  | up   | 12.28  | up   | 1.00 | up   | 1.00  | up   | 1.01 | up   | ABA |
| OsAffx.9457.1.S1_at   | LOC_Os01g60330 | inactive receptor kinase At2g26730 precursor, putative, expressed                   | 1.03  | down | 1.12  | down | 2.28   | down | 1.28 | down | 1.60  | down | 1.20 | down | ABA |
| OsAffx.9523.1.S1_x_at | LOC_Os01g64820 | POLA1 - Putative DNA polymerase alpha catalytic subunit, expressed                  | 1.43  | down | 1.24  | down | 3.73   | down | 1.05 | up   | 2.07  | down | 1.45 | down | 2   |
| OsAffx.9698.1.S1_x_at | LOC_Os01g09260 | cytokinin dehydrogenase precursor, putative, expressed                              | 1.03  | down | 12.22 | up   | 1.05   | up   | 1.39 | down | 1.48  | down | 1.48 | up   | BAP |
| OsAffx.9719.1.S1_x_at | LOC_Os01g08380 | transferase family protein, putative, expressed                                     | 1.01  | up   | 1.43  | up   | 2.54   | down | 1.69 | up   | 1.24  | up   | 4.65 | up   | 2   |
| OsAffx.9740.1.S1_s_at | LOC_Os01g73240 | expressed protein                                                                   | 1.18  | down | 1.14  | down | 2.66   | down | 1.65 | down | 2.19  | down | 1.81 | down | 2   |
| OsAffx.985.1.S1_x_at  | LOC_Os01g59580 | retrotransposon protein, putative, unclassified                                     | 1.96  | down | 2.73  | up   | 1.57   | down | 1.23 | down | 1.51  | down | 1.64 | down | BAP |

**Supplementary Table S2.** Number of rice genes showing similar and opposite regulation by any two hormones is indicated.

|            | <b>IAA</b> | <b>BAP</b> | <b>ABA</b> | <b>ACC</b> | <b>SA</b> | <b>JA</b> |
|------------|------------|------------|------------|------------|-----------|-----------|
| <b>IAA</b> | -          | 26/14      | 114/92     | 12/4       | 102/47    | 48/37     |
| <b>BAP</b> | 20         | -          | 49/31      | 7/6        | 18/14     | 28/14     |
| <b>ABA</b> | 50         | 105        | -          | 34/27      | 317/239   | 136/134   |
| <b>ACC</b> | 22         | 9          | 60         | -          | 35/22     | 29/17     |
| <b>SA</b>  | 15         | 58         | 53         | 23         | -         | 124/95    |
| <b>JA</b>  | 37         | 50         | 142        | 25         | 31        | -         |

The number of rice genes showing similar regulation by any two hormones [up- (left) or down- (right) regulated by both hormones] are indicated on the upper (above the blank cells) side of the table. The number of rice genes showing opposite regulation by any two hormones (up-regulated by one hormone and down-regulated by other hormones) are indicated on the lower (below the blank cells) side of the table. IAA, auxin; BAP, cytokinin; ABA, abscisic acid; ACC, ethylene derivative; SA, salicylic acid; JA, jasmonic acid.

**Supplementary Table S3.** Primers sequences used for real-time PCR analysis.

| <b>Gene ID</b> | <b>Primer sequence</b>  |
|----------------|-------------------------|
| Os01g07030_F   | GGTGGAGGGCATGGTGTACT    |
| Os01g07030_R   | CCATTGAGGCTATGCGTG TTC  |
| Os01g18360_F   | TCAACAAGTTCCTGGCCAGAA   |
| Os01g18360_R   | CCCGTCCTGGTCTTCATAGG    |
| Os01g73200_F   | TTCTTCAACGCAACCACCAA    |
| Os01g73200_R   | TCGATCATGCCCATCTTGAC    |
| Os04g44280_F   | AGGAGATCCCTGTGGTGATCAT  |
| Os04g44280_R   | TCCAAGCACCTGTTGATCCTT   |
| Os04g44354_F   | AGTTCATCAATTGCGCGTACAT  |
| Os04g44354_R   | TCTCGATGCAGTCACGTACGA   |
| Os05g14370_F   | CGGGAGCATACTGGATTGCT    |
| Os05g14370_R   | CCGACGTAGCGAGAATTCAGA   |
| Os09g35870_F   | TTCGTGAAGGTGAGCATGGA    |
| Os09g35870_R   | GGAGCAGTAGAACATGTCGTTGA |
| Os10g09920_F   | GGTACATGCCCCATCAATGTG   |
| Os10g09920_R   | GGAACATTTAAGCTGAGCACGTT |
| Os10g34040_F   | GGCTGTCGTCGACTACGAGAT   |
| Os10g34040_R   | CCGGTTGTACAGCTCCCAGTT   |
| Os12g44290_F   | AGATCAGGGATGCGTTTCATG   |
| Os12g44290_R   | GTCACGAGCCCGAAGATCAG    |
